# Supplementary material for: Extent of the annual Gulf of Mexico hypoxic zone influences microbial community structure
Source: PLoS One. 2019 Apr 25;14(4):e0209055. doi: 10.1371/journal.pone.0209055 (PMC6483191; doi:10.1371/journal.pone.0209055)
Supplement: S2 File — Table A. 2014 nGOM hypoxic zone sample metadata and in situ chemistry. Table B. Wilcoxon B-H corrected p-values for diversity statistics and environmental variables for all datasets. Table C. Operational taxonomic unit (OTU) table for all samples collected in 2014. Table D. P-values (B-H corrected) for Spearman's correlation coefficients for Y14 surface and bottom samples. Table E. Spearman's Correlation coefficients (ρ) for Y14 surface and bottom samples. Table F. P-values (B-H corrected) for Spearman's correlation coefficients for Y14 bottom samples only. Table G. Spearman's Correlation coefficients (ρ) for Y14 bottom samples only. Table H. Envfit B-H corrected p-values for NMDS ordinations. Table I. P-values (B-H corrected) for Spearman's correlation coefficients for Y13 same samples only. Table J. Spearman's Correlation coefficients (ρ) for Y13 same samples only. Table K. P-values (B-H corrected) for Spearman's correlation coefficients for Y14 same samples only. Table L. Spearman's Correlation coefficients (ρ) for Y14 same samples only. (XLSX) [file pone.0209055.s002.xlsx]

## Sheet: Table A
Table A. 2014 nGOM hypoxic zone sample metadata and in situ chemistry.
Sample name	Date sampled	Latitude	Longitude	Depth (m)	DO (mg/L)	NH4 (μM)	NO3+NO2 (μM)	PO4 (μM)	Salinity (ppt)	Temperature (°C)	pH	Chlorophyll a (μg/L)		Key:
A'2B	2014-07-27	29.0917	-89.5	8.81	0.31	0.3	14.9	1.5	34.5	27	6.91	0.92		Surface
A'4B	2014-07-27	28.9833	-89.5667	30.78	1.53	0.3	10.7	1.2	36.2	22	5.66	0.16		Hypoxic Bottom
A'4S	2014-07-27	28.9833	-89.5667	0.7	9.4	0.6	2.2	0.5	16.5	31	8.44	22.78		Oxic Bottom
A'5B	2014-07-27	28.95	-89.575	50.4	3.28	0.6	11	1.1	36.3	19.8	5.83	0.18
A'5S	2014-07-27	28.95	-89.575	0.6	7.1	0.4	0.4	0.6	18.9	29.6	8.53	15.05
A1B	2014-07-28	29.29	-89.75	4.3	0.81	1.9	13.6	1.6	28.8	28.9	7.35	4.44
A1S	2014-07-28	29.29	-89.75	0.7	5.8	0.2	1.2	0.7	22.1	29.6	7.86	12.05
A3B	2014-07-28	29.1783	-89.75	13.8	0.99	0.4	13	1.7	35.7	25.9	7.11	0.78
A3S	2014-07-28	29.1783	-89.75	0.79	6.45	0.5	0.4	0.8	27.2	29.4	7.91	2.81
A5B	2014-07-28	29.07	-89.75	28.6	1.64	0.9	14.6	1.5	36.3	20.6	6.16	0.76
A5S	2014-07-28	29.07	-89.75	1.11	7.58	0.2	0.3	0.7	25.1	29.8	8.13	2.41
A7B	2014-07-28	28.9418	-89.7497	47.2	2.83	0.5	13.5	1.3	36.4	19.5	5.91	0.15
A7S	2014-07-28	28.9418	-89.7497	0.83	9.03	0.2	0.3	0.6	24.4	30.06	8.17	3.58
B2S	2014-07-28	29.0717	-90.1902	0.7	5.61	0.7	1.9	1.1	30.78	29	7.59	8.81
B2B	2014-07-28	29.0717	-90.1902	8.4	0.19	1.6	13.3	2.9	35.3	26.4	6.96	3.86
B6B	2014-07-28	28.9933	-90.0767	19.8	0.64	0.3	9.6	1.1	36.2	22.6	6.49	1.41
B6S	2014-07-28	28.9933	-90.0767	0.7	6.7	0.3	0.3	0.8	25.2	29.6	7.88	12.95
B8B	2014-07-28	28.9247	-90.0317	28.2	2.1	0.4	9	1.1	36.3	21.4	6.55	0.47
B8S	2014-07-28	28.9247	-90.0317	0.8	8.8	0.2	0.3	0.9	22	30.2	8.21	19.66
B9B	2014-07-28	28.8326	-90.0031	36.1	1.97	0.4	11.5	1.2	36.3	20.3	5.73	0.3
C3B	2014-07-29	28.9907	-90.5208	9.54	1.56	3.8	5.8	1.9	35.4	25.6	7.22	1.55
C3S	2014-07-29	28.9907	-90.5208	0.97	4.59	0.3	3.7	1.3	29.5	28.2	7.63	9.34
C6CB	2014-07-29	28.8686	-90.4903	17	1.06	2.6	11.6	1.5	35.8	24.8	6.84	0.9
C6CS	2014-07-29	28.8686	-90.4903	1.62	7.06	0.4	4.2	0.7	23.8	24.4	8.06	13.26
C7B	2014-07-29	28.8322	-90.3922	18.7	1.01	2.4	10.9	1.3	35.9	24.4	7.06	0.68
C9B	2014-07-28	28.7602	-90.2357	27.7	2.89	0.7	8	1.1	36.3	21.2	6.23	0.43
C9S	2014-07-28	28.7602	-90.2357	1.05	8	0.5	0.3	0.6	20.1	30.3	8.43	5.72
D'1B	2014-07-29	28.775	-90.5283	16.4	1.66	1.5	11.4	1.4	35.5	25.2	7.67	1.21
D'1S	2014-07-29	28.775	-90.5283	1.5	7.22	0.9	40.3	1	17.5	29.7	8.4	22.17
D'3B	2014-07-29	28.6417	-90.5333	23.4	1.21	0.7	10.8	1.3	36.1	23.4	7.07	0.62
D'3S	2014-07-29	28.6417	-90.5333	1.5	7.96	1.1	10.8	0.7	19.7	30.1	8.58	26.87
D'5B	2014-07-29	28.53	-90.5417	33.5	2.75	0.6	7.3	1.2	36.3	21.6	6.75	0.75
D'5S	2014-07-29	28.53	-90.5417	1.4	8.1	0.6	6.5	0.6	20	30.3	8.6	20.41
D1B	2014-07-29	28.9833	-90.8333	6.9	0.7	5.451	7.89869	2.55502	35	26	7.03	4.04
D1S	2014-07-29	28.9833	-90.8333	1.3	7.86	0.897	4.06863	1.47226	30.2	28.4	7.74	22.76
D2B	2014-07-29	28.8417	-90.8333	14.5	0.13	1.472	11.9137	1.83732	35.5	25	6.8	0.57
D2S	2014-07-29	28.8417	-90.8333	1.36	5.4	0.92	42.5	1.29475	19.8	29.8	7.88	7.7
D3B	2014-07-29	28.7167	-90.8333	16.3	0.99	0.989	11.5385	1.39916	35.8	24.36	6.67	1.32
D3S	2014-07-29	28.7167	-90.8333	1.4	10.5	0.8625	26.0638	0.816527	15.63	30.66	8.34	25.51
D5B	2014-07-29	28.5003	-90.8327	31.7	4.13	0.7	4.7	1	36.3	21.4	6.24	0.98
D5S	2014-07-29	28.5003	-90.8327	1.46	8.1	0.7	0.5	0.7	19.3	30.7	8.29	15.69
E2AB	2014-07-30	28.7417	-91.25	14.4	1.92	1.2	8	1.3	35.5	24.9	7.13	1.84
E2AS	2014-07-30	28.7417	-91.25	1.53	7.28	0.7	4.2	0.7	21.5	29.8	8.07	8.58
E2B	2014-07-30	28.8583	-91.25	7.55	1.71	3.4	6.3	1.4	34.8	26.1	7.19	2.22
E2S	2014-07-30	28.8583	-91.25	1.33	5.82	2.4	56.6	1.8	20.4	29.3	7.72	3.11
E4B	2014-07-30	28.5833	-91.25	29.9	3.8	0.6496	4.82353	1.11724	36.3	21.9	6.93	1.33
E4S	2014-07-30	28.5833	-91.25	1.44	6.42	0.56	0.352941	0.820704	28.4	29.6	7.95	0.63
F1B	2014-07-30	29.1833	-91.6167	6.15	1.51	1.716	2.28431	1.21122	34.3	26.7	6.58	16.01
F1S	2014-07-30	29.1833	-91.6167	1.2	13.4	0.869	2.7549	0.808174	23.1	30.6	7.94	32.52
F2AB	2014-07-30	28.9482	-91.5788	14.5	0.96	0.6496	8.8743	1.25298	35.7	24.1	6.43	2.85
F2AS	2014-07-30	28.9482	-91.5788	1.7	6.68	0.6832	0.362745	0.822792	28.5	30.2	7.66	0.69
F4B	2014-07-30	28.7833	-91.6167	23.2	3.35	0.8624	4.78431	1.14857	36.1	23.5	6.77	2.95
F4S	2014-07-30	28.7833	-91.6167	1.7	6.51	0.672	0.373529	0.843675	29.2	29.8	7.74	0.51
F6B	2014-07-30	28.5833	-91.6167	38.4	4.49	0.7952	3.68627	1.07548	36.3	21.5	6.41	1.81
F6S	2014-07-30	28.5833	-91.6167	1.95	6.35	0.6384	0.37451	0.843675	29.7	29.5	7.67	0.49
G2B	2014-07-31	29.1333	-92	10.4	2.62	0.704	1.53922	1.16945	35.6	24.9	6.98	9.84
G2S	2014-07-31	29.1333	-92	1.52	6.65	0.616	0.380392	0.916766	28.8	29.7	7.91	1.07
G3B	2014-07-31	28.9833	-92	19.6	3.16	0.847	3.01961	1.1068	35.8	24.6	7.18	1.58
G3S	2014-07-31	28.9833	-92	1.64	6.56	0.583	0.369608	0.83219	29.3	29.8	7.94	0.42
G5B	2014-07-31	28.7917	-92	29.2	4.16	0.918595	2.66185	1.11836	36.2	22.9	6.95	2.66
G5S	2014-07-31	28.7917	-92	1.49	6.43	0.844685	0.348998	0.881135	30.9	29.6	7.92	0.3
H1B	2014-07-31	29.4088	-92.3831	8.1	1.99	5.17369	4.85048	1.42105	32.2	28.2	6.56	6.25
H1S	2014-07-31	29.4088	-92.3831	1.4	6.7	0.95027	0.326323	0.856842	31	31	7.23	1.9
H3B	2014-07-31	29.1583	-92.3833	13.45	2.03	1.2987	4.60401	1.11579	35.27	25.47	6.85	3.98
H3S	2014-07-31	29.1583	-92.3833	1.5	6.4	0.834126	0.281959	0.749671	28.7	29.9	7.69	0.53
H4B	2014-07-31	29.0333	-92.3833	21.8	4.5	1.01362	1.1929	1.03621	35.7	24.9	7.46	2.25
H4S	2014-07-31	29.0333	-92.3833	1.65	6.5	0.834126	0.292803	0.74856	30.7	29.4	7.92	0.43
H5B	2014-07-31	28.9083	-92.3833	27.4	4.73	1.28814	0.717713	1.05953	36.1	23.8	8.09	2.2
H5S	2014-07-31	28.9083	-92.3833	1.67	6.39	0.834126	0.336181	0.917362	31.8	29.7	8.38	0.24
I1B	2014-07-31	29.533	-92.75	10	0.37	1.18256	7.38416	1.47368	32.9	27.9	6.68	5.19
I1S	2014-07-31	29.533	-92.75	1.4	6.3	1.72105	0.32928	0.789474	30.5	28.3	7.53	0.6
I2B	2014-07-31	29.4083	-92.75	14.1	2.12	1.28814	2.98718	1.06316	34.3	27	5.56	3.98
I2S	2014-07-31	29.4083	-92.75	1.6	6.6	1.06641	0.328294	0.742105	29.5	30.3	6.89	0.63
I3B	2014-07-31	29.295	-92.75	16.2	1.46	1.00772	0.662504	0.948421	34.65	26.5	5.95	1.11
I3S	2014-07-31	29.295	-92.75	1.6	6.5	0.960829	0.337167	0.802105	31.5	29.7	7.04	0.49
I5B	2014-08-01	29.05	-92.7503	23.4	4.67	1.51666	0.469274	0.994737	35.7	24	6.7	1.59
I5S	2014-08-01	29.05	-92.7503	1.52	6.42	0.905926	0.337167	0.844211	32.3	29.6	7.63	0.29
J1B	2014-08-01	29.6333	-93.0833	9	0.41	1.75078	1.9323	1.00421	30.8	29.4	7.2	2.94
J1S	2014-08-01	29.6333	-93.0833	1.8	6.26	1.34362	0.336181	0.809474	28.5	29.9	7.72	0.58
J3B	2014-08-01	29.3917	-93.0833	14.1	2.96	1.84239	1.14361	1.00421	34	28.2	7.34	2.68
J3S	2014-08-01	29.3917	-93.0833	1.64	6.45	0.916105	0.313506	0.773684	28.4	30.1	7.79	0.39
J5B	2014-08-01	29.1167	-93.0833	19.2	3.52	0.916105	0.371673	0.948421	35.2	26.3	6.99	0.55
J5S	2014-08-01	29.1167	-93.0833	1.75	6.33	0.844852	0.340125	0.829474	31.2	29.8	7.67	0.25
K2B	2014-08-01	29.6417	-93.4167	9.8	0.57	2.30284	1.37036	0.895789	30.9	29.7	7.29	0.62
K2S	2014-08-01	29.6417	-93.4167	2	5.56	2.29026	1.05488	0.877895	30	29.7	7.67	0.56
K3B	2014-08-01	29.4883	-93.4167	10.6	1.14	1.04853	3.59842	1.07368	31.7	29.4	7.49	1.76
K3S	2014-08-01	29.4883	-93.4167	1.9	6.1	1.17592	0.32928	0.771579	30.1	29.6	7.84	0.62
K4B	2014-08-01	29.325	-93.4167	15.3	1.56	6.69294	0.889254	1.04421	34.08	28.17	7.56	4.35
K4S	2014-08-01	29.325	-93.4167	1.8	6.25	1.15632	0.344068	0.847368	31.4	29.6	7.86	0.39
K6B	2014-08-01	29	-93.4167	23.3	5.73	1.09753	0.425895	0.971579	35.8	26.1	7.11	1.28
K6S	2014-08-01	29	-93.4167	1.5	6.3	0.960334	0.342097	0.86	33	30	7.55	0.37
P2B	2014-08-02	29.518	-94.0173	10.5	4.18	1.32291	0.411107	0.918947	32.8	29.9	7.68	0.98
P2S	2014-08-02	29.518	-94.0173	1.67	5.89	1.37191	0.397305	0.925263	32.8	29.9	7.74	0.9
P4B	2014-08-02	29.325	-93.4167	13.6	3.39	1.03873	0.450542	0.941053	34.2	28.8	7.11	1.36
P4S	2014-08-02	29.325	-93.4167	1.73	6.2	0.88194	0.360828	0.886316	32.8	30.2	7.48	0.33
P6B	2014-08-02	29.0015	-93.7099	18.6	5.64	0.970134	0.433782	0.970526	35.9	27	7.12	1.3
P6S	2014-08-02	29.0015	-93.7099	1.3	6.34	0.87214	0.358856	0.853684	33.1	30.2	7.46	0.31
R2	2014-07-27	28.5157	-89.2817	0	N.D.	0.9	71.7	2.2	10.5	N.D.	N.D.	18.59
R4	2014-07-27	28.5444	-89.258	0	N.D.	2.7	194	6.1	2	N.D.	N.D.	1.82

## Sheet: Table B
Table B. Wilcoxon B-H corrected p-values for diversity statistics and environmental variables for all datasets.
2014 ALL samples	Variable	Wilcoxon test p-value	B-H corrected p-value
Surface vs Bottom	Shannon	2.057e-05	2.884e-05
	Equitability	0.03608	0.0388554
	Observed	1.385e-09	3.24333e-09
	qPCR Thaumarchaeota (copy/L)	3.135e-09	6.28e-09
	qPCR amoA (copy/L)	1.677e-07	2.94e-07
	G oligotype (CSS normalized)	0.001818	0.00231382
	NO2+NO3 (μM)	3.115e-07	4.85333e-07
	NH4 (μM)	0.003751	0.00437617
	PO4 (μM)	4.263e-11	1.1928e-10
	Dissolved Oxygen (DO) (mg/L)	2.2e-16	1.54e-15
	Salinity (ppt)	3.523e-16	1.64267e-15
	Temperature (°C)	2.803e-15	9.8e-15
	Depth (m)	2.2e-16	1.54e-15
	Chlorophyll a (μg/L)	0.56	0.56
2014 Bottom only samples	Variable	Wilcoxon test p-value	B-H corrected p-value
Hypoxic vs Oxic	Shannon	0.8622	0.8622
	Equitability	0.524	0.666909
	Observed	0.111	0.1554
	qPCR Thaumarchaeota (copy/L)	0.0002828	0.0009898
	qPCR amoA (copy/L)	0.0006332	0.001464
	G oligotype (CSS normalized)	1.873e-05	0.0001309
	NO2+NO3 (μM)	0.0003816	0.00106848
	NH4 (μM)	0.04187	0.0651311
	PO4 (μM)	4.676e-05	0.0002184
	DO (mg/L)	1.594e-09	2.226e-08
	Salinity (ppt)	0.01048	0.018375
	Depth (m)	0.0007316	0.001464
	Temperature (°C)	0.59	0.688333
	Chlorophyll a (μg/L)	0.67	0.721538
Y13 and Y14 same samples	Variable	Wilcoxon test p-value	B-H corrected p-value
Y13 vs Y14	Shannon	0.2819	0.438511
	Equitability	0.3327	0.46578
	Observed	0.8155	0.8155
	qPCR Thaumarchaeota (copy/L)	0.0003728	0.0013048
	qPCR amoA (copy/L)	0.001555	0.00362833
	G oligotype (CSS normalized)	8.357e-07	1.1704e-05
	NO2+NO3 (μM)	0.5502	0.6419
	NH4 (μM)	0.0005445	0.0015246
	PO4 (μM)	0.04055	0.0811
	DO	0.2622	0.438511
	Salinity	0.0003683	0.0013048
	Temperature (°C)	0.0001698	0.0011886
	Depth (m)	0.41	0.521818
	Chlorophyll a (μg/L)	0.7	0.753846
Y14 only same samples	Variable	Wilcoxon test p-value	B-H corrected p-value
Hypoxic vs Oxic	Shannon	0.5261	0.5261
	Equitability	0.04857	0.0849975
	Observed	0.097	0.123455
	qPCR Thaumarchaeota (copy/L)	0.05898	0.0917467
	qPCR amoA (copy/L)	0.1308	0.1526
	G oligotype (CSS normalized)	0.008841	0.024752
	NO2+NO3 (μM)	0.001088	0.00507733
	NH4 (μM)	0.0926	0.123455
	PO4 (μM)	0.0008766	0.00507733
	DO (mg/L)	1.616e-06	2.268e-05
	Salinity (ppt)	0.02742	0.05484
	Temperature (°C)	0.02014	0.0469933
	Depth (m)	0.003638	0.012733
	Chlorophyll a (μg/L)	0.2417	0.260292
Y13 only same samples	Variable	Wilcoxon test p-value	B-H corrected p-value
Hypoxic vs Oxic	Shannon	0.0008785	0.00307475
	Equitability	0.001421	0.0039788
	Observed	0.195	0.248182
	qPCR Thaumarchaeota (copy/L)	0.0126	0.0252
	qPCR amoA (copy/L)	0.0259	0.045325
	G oligotype (CSS normalized)	7.691e-05	0.0005383
	NO2+NO3 (μM)	0.09894	0.138516
	NH4 (μM)	0.9097	0.9097
	PO4 (μM)	0.0004146	0.0019348
	DO (mg/L)	2.36e-06	3.304e-05
	Salinity (ppt)	0.04198	0.0653022
	Temperature (°C)	0.003324	0.007756
	Depth (m)	0.7336	0.790031
	Chlorophyll a (μg/L)	0.6228	0.7266

## Sheet: Table C
Table C. Operational taxonomic unit (OTU) table for all samples collected in 2014.
Sample	A'2B	A'4B	A'4S	A'5B	A'5S	A1B	A1S	A3B	A3S	A5B	A5S	A7B	A7S	B2S	B2B	B6B	B6S	B8B	B8S	B9B	C3B	C3S	C6CB	C6CS	C7B	C9B	C9S	D'1B	D'1S	D'3B	D'3S	D'5B	D'5S	D1B	D1S	D2B	D2S	D3B	D3S	D5B	D5S	E2AB	E2AS	E2B	E2S	E4B	E4S	F1B	F1S
OTU4369009	45268	96444	7	35634	5	10140	246	55305	170	16504	46	27759	14	2373	44700	48803	787	25928	25	20943	25112	7355	45973	1110	26951	24200	27	5807	319	23627	9	17424	9	15966	12589	52311	3060	20848	125	34181	12	7150	111	10378	21	12987	2	5261	130
OTU557211	229	378	392	77	390	1789	607	1900	5025	155	4647	206	19463	6860	1836	756	2261	645	1948	262	389	518	683	265	489	740	922	1540	586	741	456	934	1185	300	167	367	2622	4031	724	1575	575	4346	3289	12099	70	3790	29816	2527	1347
OTU404788	4983	2750	50313	1060	31819	9683	14619	3209	4654	1489	3697	1237	16169	20595	3187	1901	20571	1153	47675	689	6523	24858	3867	26531	3094	1028	25120	2647	18623	709	17490	1176	25508	3284	17951	6197	62845	1146	30580	322	33714	474	15991	2054	89	53	6833	1106	5986
OTU1141722	2974	2440	37778	968	26512	6984	15042	1994	1875	1562	1943	1114	2627	9861	1669	1407	13648	851	25482	542	3192	14113	2858	9527	2239	895	22108	1227	5529	511	11937	370	14207	1207	3117	1821	18772	357	14788	159	25622	15	5507	171	49	10	33	201	1424
OTU691149	296	802	193	336	251	767	643	1203	400	270	482	161	544	748	459	626	1414	1664	474	1353	286	1782	901	4088	792	1505	829	544	549	795	271	1221	674	182	489	71	550	711	195	2084	182	657	1838	2107	43	1042	10353	1858	1020
OTU4404499	1568	2344	415	1564	584	1648	752	4783	694	836	275	1424	333	1371	1854	1597	2026	3636	106	2735	1544	2487	2913	902	3581	1863	271	1662	1054	2870	157	3549	185	1236	1305	1401	504	4480	107	5161	62	3341	1270	7615	58	2939	2140	2830	990
OTU592269	818	517	2610	141	3395	2002	1177	555	1489	105	561	93	796	1015	459	726	4095	288	1333	161	746	3645	860	2703	472	454	1941	491	2255	363	1623	441	5036	356	1765	492	2742	571	2449	651	1037	969	6532	3209	54	616	6393	1329	2170
OTU3996107	3144	3866	5299	1100	7451	8843	7849	3906	3140	3669	1639	1500	417	5836	2415	4589	11966	1911	2562	1002	3454	6885	5107	1582	2642	2057	4998	2664	4701	645	5833	356	10349	1975	1906	2406	7520	613	5415	116	10135	47	4570	798	154	35	9	1889	581
OTU639502	1189	1018	133	368	307	5260	541	3463	1641	316	585	336	569	2279	3411	2421	4940	1071	257	1033	1074	2844	1420	1300	1415	1367	675	505	735	1446	174	1546	386	1491	1813	1528	1048	2749	323	2510	229	869	734	9062	19	441	3636	2498	457
OTUNew.ReferenceOTU4	1003	812	17749	345	11732	3329	6883	950	1004	575	1137	359	1590	4690	767	455	6657	329	11757	158	968	6308	858	4958	655	264	11189	242	2172	98	3223	126	4626	403	1459	554	6098	105	4658	21	5087	6	2218	59	13	7	26	65	852
OTU3156804	1116	2335	5	1649	6	402	12	5334	83	601	42	867	26	190	1670	1685	354	3145	18	2752	1733	1273	1733	251	1932	2425	24	741	51	2254	3	3402	24	1354	1030	3146	214	3971	34	4951	11	2118	290	6889	12	2456	595	2475	308
OTU427495	746	517	4974	324	3221	4733	2419	1195	9627	445	10677	691	16544	3793	2031	992	2876	474	3235	324	583	1682	644	691	529	438	2471	980	513	215	395	139	842	294	509	286	2279	601	597	262	745	247	478	1375	30	210	3103	666	317
OTU266046	1780	2060	251	1564	516	2252	1228	5959	1589	1678	2728	2088	3064	2692	3106	1864	4710	1592	432	1672	2792	2808	3024	1936	1798	1747	711	3579	2536	745	611	1954	698	2748	4260	4113	3072	1993	937	1604	264	248	1507	1079	308	360	427	2614	947
OTU1584736	1453	16137	1	7718	1	1	3	3010	5	4257	4	9632	3	17	1189	3834	13	3723	2	5356	906	154	1671	4	1251	5496	2	358	1	3264	0	8807	3	594	202	696	17	5317	1	4566	1	2234	0	2198	2	1815	0	680	0
OTU779927	177	63	1716	35	2469	922	390	51	5474	21	7927	2	12814	1111	121	140	1267	17	1394	1	113	821	197	4184	129	12	1801	2032	5000	36	2445	86	4257	131	1490	92	1909	88	572	4	850	110	12163	297	390	1	1153	520	3198
OTU585063	1958	1045	618	400	801	6486	1998	2439	11775	306	5693	394	5043	2733	3772	1120	4095	576	554	331	1601	2629	1404	1117	1129	439	1150	3416	1507	664	497	525	830	1588	1312	1304	1637	829	772	434	707	71	1104	1178	214	52	765	1556	342
OTU678713	345	99	1619	26	2405	833	2052	524	1310	38	2303	30	3968	883	625	208	2061	125	2579	60	396	3844	584	3819	380	104	4724	488	2716	214	1568	306	2892	282	1750	839	2796	466	1950	252	520	169	1989	446	40	102	3811	522	675
OTU837775	1607	1190	11	563	96	6769	783	3818	11277	370	2356	664	2775	1044	2633	1525	620	2088	174	1642	1552	835	1575	475	1601	986	188	505	130	1311	19	1336	42	1296	760	3109	387	1677	44	2737	68	50	73	734	1	156	1323	1124	19
OTU819670	266	3196	3	3162	1	4	1	2543	9	1834	1	3725	2	7	663	3358	13	2995	0	3142	555	169	2733	3	2597	3685	0	573	2	1886	1	3475	0	219	135	252	7	3348	1	3665	3	863	0	1436	5	1633	0	794	1
OTU346431	75	35	453	6	708	390	535	103	2328	27	4435	23	13942	1468	159	98	2361	41	1619	22	157	1085	379	2724	135	23	2553	670	1781	52	573	78	1310	132	374	520	1296	78	718	19	431	51	2110	191	45	3	4140	526	707
OTU60638	904	3583	1	2217	1	133	7	4849	21	1138	10	1646	0	94	1252	777	61	2762	3	2750	823	359	1229	12	1878	2248	0	474	4	1839	2	3568	2	696	369	451	28	3847	0	4989	3	1239	1	3803	1	1638	26	880	12
OTU230774	182	224	1	103	4	556	40	496	171	40	153	68	161	125	274	200	234	426	82	300	71	220	204	336	346	341	87	126	120	286	36	347	61	128	46	48	92	531	29	609	50	638	377	2300	6	491	879	1228	230
OTU4414717	57	4	22	20	268	2779	351	34	9426	9	3265	0	5962	643	78	36	848	8	239	2	48	167	55	818	32	4	318	872	639	5	121	17	173	28	45	40	244	9	109	0	161	150	1791	450	182	4	1334	257	1007
OTU152417	137	204	4	108	19	198	14	475	249	77	488	122	539	443	324	527	689	365	83	269	183	188	861	538	472	487	200	293	167	393	32	697	106	118	58	115	245	866	65	844	90	564	800	2414	18	237	2457	1041	314
OTU227717	514	1631	0	1021	8	540	13	1834	68	562	44	675	52	192	785	840	362	1557	37	1739	519	441	1124	121	1065	942	46	381	43	1451	4	2147	25	615	403	299	70	2287	10	3366	11	1254	157	3078	5	1221	383	815	86
OTU104364	1565	4271	2	1281	0	125	0	4286	41	776	9	1070	2	154	993	3489	141	2253	3	1549	618	257	2725	4	2107	2382	3	215	2	2161	0	2562	8	212	231	888	27	1835	0	5464	0	990	0	2921	0	1845	61	282	0
OTU99933	885	198	1	38	16	7883	389	1278	2393	41	124	29	206	650	560	180	295	64	137	55	236	233	545	859	553	127	98	247	124	388	25	308	74	351	248	205	271	966	32	466	44	451	340	1224	8	288	803	655	159
OTU344865	60	21	50	8	240	2337	483	112	20842	7	9993	16	19021	324	79	50	380	31	214	29	36	63	96	486	57	24	382	430	390	22	138	33	232	12	14	37	166	55	100	9	89	20	286	96	41	4	366	105	163
OTU319272	13	17	765	3	797	1547	6676	15	85	3	0	1	26	32	3	1	734	3	222	1	130	5103	11	1658	7	1	924	991	3058	2	3253	53	4125	61	3182	24	4410	22	10789	30	4540	3	2129	28	48	0	0	30	1207
OTU341734	122	191	92	10	188	652	218	229	2369	45	2323	5	3415	261	107	577	504	137	512	37	84	109	519	853	303	174	390	417	309	146	106	102	353	86	65	28	358	195	119	93	81	104	550	343	24	65	3428	1019	174
OTU347569	255	706	1	189	7	39	7	1213	28	303	9	209	33	48	378	1411	56	1056	13	808	330	229	1355	103	784	811	26	194	31	780	3	986	49	199	168	443	100	1393	4	1561	7	604	159	2661	4	443	1628	1311	60
OTU1111501	570	725	1	364	19	4061	130	1450	614	190	84	289	125	349	1170	1059	292	603	82	729	364	383	610	382	716	643	75	217	118	615	29	693	109	491	255	381	351	1413	46	897	104	358	245	4269	3	145	1622	852	126
OTU234927	749	545	887	171	1439	523	2154	2493	553	356	1631	212	1342	1410	1064	438	3613	384	821	268	391	3175	896	1234	583	294	2109	661	1534	413	1052	838	1296	250	1223	891	1959	426	1033	578	294	52	672	307	32	39	1500	606	219
OTU563843	463	528	239	110	393	1655	514	1568	2715	109	2579	78	1963	604	541	1191	713	665	393	278	373	425	1286	1086	696	628	455	755	519	694	140	461	379	223	207	317	622	1127	318	759	273	260	489	1052	40	237	1476	641	152
OTU1104793	541	376	248	231	343	1340	1739	1810	652	96	211	132	258	881	1688	658	2322	315	264	355	913	4410	357	2125	357	424	604	420	4480	388	833	385	1058	1292	3450	1935	1707	707	1482	783	291	131	592	1727	20	80	453	655	811
OTUNew.ReferenceOTU0	2	10	0	10	1	7	0	45	3	3	7	0	0	25	11	20	2	86	0	54	8	2	68	4	26	53	0	19	0	30	0	67	0	4	0	1	1	287	0	437	0	217	4	450	3	259	45	81	3
OTU4462888	247	132	42	75	677	2741	159	381	16614	11	2699	47	8604	542	167	296	349	132	52	47	49	35	687	171	644	40	42	2135	65	217	27	35	28	38	18	14	59	252	13	77	20	210	105	1105	85	50	719	95	9
OTU216695	74	38	1900	13	2616	434	1030	106	565	35	466	22	1754	944	75	110	1027	41	1317	17	137	1439	138	4286	135	26	2817	483	2776	108	2152	175	2944	162	1891	76	3218	76	3539	24	2147	17	1326	42	45	0	1691	365	733
OTU4475220	205	81	24	22	42	905	313	417	510	22	288	9	274	419	155	72	693	114	172	51	204	628	281	853	183	70	253	176	318	198	49	119	136	131	314	95	239	481	69	165	89	631	1265	2160	27	159	1427	377	527
OTU275493	1742	1325	418	381	651	1099	1176	3255	551	346	357	203	449	1970	1485	487	2958	709	431	577	292	3332	430	1866	378	441	644	439	1742	375	462	392	552	342	3105	218	1193	893	749	312	80	323	901	839	49	149	129	524	1140
OTU533688	158	123	516	46	344	363	167	233	986	59	593	102	1233	1057	508	232	787	194	1322	101	153	154	233	230	169	213	485	287	73	212	106	194	236	84	101	134	383	700	134	881	152	449	173	853	3	525	1576	458	187
OTU3134564	4160	3904	0	2172	0	237	3	6096	5	1735	1	2162	1	150	3682	1210	10	1247	0	2210	3502	351	1243	2	708	1268	1	55	0	373	0	135	1	375	284	8006	10	322	2	61	0	394	0	2340	1	36	1	254	0
OTU571236	1102	7945	2	4748	1	69	0	1594	4	2579	5	6153	5	21	598	3516	8	2796	1	3817	802	136	2367	6	844	2800	1	202	1	967	2	1673	1	308	115	1090	25	1264	3	1678	4	252	0	251	0	491	0	34	0
OTU4438688	16	4	228	4	680	613	667	9	5574	5	8863	1	4715	838	72	8	788	19	225	11	36	218	35	1831	43	8	396	2349	380	30	155	41	180	11	205	35	332	29	64	11	130	144	1084	1508	252	2	434	135	256
OTU267884	399	264	251	99	489	2084	811	1290	2128	176	1991	126	1878	1000	838	1376	1367	341	601	140	556	905	1938	1966	1033	277	575	1558	760	483	205	816	303	448	567	425	943	1276	466	183	226	105	378	1187	68	42	537	1029	141
OTU4462887	317	407	36	213	584	2153	88	359	6676	93	1033	116	1363	557	146	715	398	235	25	97	50	50	1074	85	684	166	22	10901	58	593	11	363	50	73	9	26	60	500	7	375	22	153	223	1170	377	217	1365	86	31
OTU233801	136	67	41	16	46	277	127	276	166	24	132	10	170	336	220	27	528	49	79	8	118	508	209	224	90	39	90	146	116	100	18	60	42	108	136	32	146	190	37	129	24	327	334	1093	11	141	466	656	290
OTU228455	67	87	0	34	11	1678	27	210	438	22	419	11	440	242	114	136	177	223	57	94	119	129	185	333	177	131	74	177	39	107	30	55	45	67	28	39	118	182	11	60	33	577	589	1812	21	107	850	346	239
OTU257395	238	1941	2	1344	9	23	17	908	20	804	38	1106	33	288	154	1094	360	1684	5	2090	217	107	872	4	1056	1487	1	309	6	1254	1	1721	1	170	67	112	20	2231	1	3378	0	633	1	1130	1	1404	3	379	10
OTU592771	26	5	4	0	76	642	119	33	8060	0	6910	1	8365	206	45	13	287	17	86	1	16	27	57	276	29	4	224	1197	187	4	50	14	80	4	7	12	54	31	23	0	28	172	544	815	268	7	502	218	233
OTU676853	329	1027	218	227	330	2150	585	2510	1765	919	2145	652	2680	906	1188	3399	949	815	577	300	767	732	3691	1372	1492	464	490	1382	768	397	240	855	394	450	602	435	612	826	314	323	172	25	190	259	46	77	122	723	79
OTU579841	331	1110	0	422	1	185	2	1061	66	276	16	192	14	84	366	543	96	1279	15	925	386	205	696	174	962	743	37	257	26	1070	4	1880	19	284	135	252	139	1858	22	2055	15	626	201	2479	4	539	422	519	122
OTU4455242	186	231	2	191	43	910	70	3813	5343	231	5953	322	5177	306	284	630	226	455	78	328	763	130	888	551	1315	401	74	700	196	442	22	805	31	299	125	368	99	553	27	1079	43	132	153	609	55	250	63	146	26
OTUNew.ReferenceOTU2	113	60	1015	39	562	722	304	157	1249	49	1248	55	3858	1422	329	90	568	64	2226	61	139	236	185	297	110	83	1321	742	304	65	339	66	630	80	123	97	1403	197	484	102	529	199	138	498	27	185	361	244	316
OTU727834	134	3141	1	972	1	23	2	73	3	1333	0	3734	2	7	549	3558	3	1091	3	2045	1001	48	2111	0	929	992	2	527	1	2287	0	2707	4	247	20	3336	2	1577	0	2725	1	84	0	149	0	1427	1	32	0
OTU4253236	982	589	1873	198	1186	294	553	177	74	223	56	140	80	267	113	118	309	94	2295	61	298	588	180	793	209	75	1515	286	1652	61	1596	77	2138	122	256	366	2508	90	2163	38	3710	4	762	24	8	1	17	31	96
OTUNew.ReferenceOTU1	2711	14082	1	3864	1	419	4	3450	18	5414	5	5219	0	9	1290	1789	6	137	0	637	107	34	330	0	20	4	2	2	0	3	1	1	0	54	23	15	0	1	1	1	0	0	0	0	0	1	0	0	0
OTU545350	438	1592	0	830	0	81	1	1658	16	1105	13	1781	6	79	945	1557	52	1090	31	1372	1410	652	2110	221	1001	1003	56	272	4	709	5	1690	5	524	431	2751	177	1563	7	1663	4	135	39	414	0	337	161	796	23
OTU240435	79	33	1665	5	2073	371	969	27	403	8	206	3	197	553	155	27	1303	13	420	0	49	1210	25	2128	24	10	1396	149	2001	4	1935	70	3757	98	1661	21	2306	40	4233	11	4023	0	690	9	16	0	20	26	323
OTU349161	100	53	141	10	265	2037	455	190	7838	10	2340	47	4793	389	97	122	301	134	282	66	57	314	195	643	182	122	421	131	283	86	104	161	223	41	219	66	278	105	225	138	156	30	359	126	9	52	532	106	143
OTU330662	27	38	63	59	86	35	23	48	46	9	23	49	62	36	26	26	85	35	104	37	23	42	24	40	26	65	69	1	48	21	53	37	80	12	42	25	174	21	44	289	105	25	3	54	0	81	444	5	15
OTU148456	14	4	15	4	52	13349	6073	1553	9119	49	206	73	94	3002	648	333	98	89	19	11	94	180	49	12	128	66	2	126	4	28	3	12	1	23	156	18	67	45	20	9	2	15	7	18	46	14	1	68	26
OTU542517	281	460	397	100	576	1655	905	828	1443	93	1531	119	1836	1106	646	781	1220	492	438	196	239	890	863	1645	587	425	320	1174	565	275	162	549	290	196	659	182	760	769	473	522	240	85	308	607	60	101	116	371	130
OTU4345058	5	13	0	0	3	34	156	4	5	1	2	0	2	2	0	1	6	1	4	3	1	43	0	31	1	1	6	112	432	3	52	1	56	4	51	2	703	0	388	2	43	10	130	6	9	0	0	4	59
OTU118018	991	1705	1	1070	0	204	5	2257	6	846	2	853	4	55	1072	1247	26	1941	0	1397	2194	317	881	1	795	989	2	107	0	617	1	964	2	1056	567	6279	14	815	0	628	1	195	5	732	1	148	0	431	4
OTU147038	312	1250	0	964	3	638	3	1264	361	225	7	761	2	277	277	1426	21	1221	0	812	308	60	1710	2	698	1494	1	55	0	458	0	1050	4	125	30	122	8	589	2	2706	1	183	1	1054	0	769	211	25	0
OTU578211	50	574	0	180	41	704	32	557	2577	416	2495	34	4825	257	343	1799	244	170	631	95	427	76	1095	581	1168	216	360	379	141	431	64	762	157	178	45	659	73	320	8	27	42	58	504	336	38	13	433	404	48
OTU274874	98	50	3288	8	5738	277	647	112	158	40	339	12	98	795	150	43	2083	52	1180	30	89	571	52	1243	49	14	3036	21	1474	17	1334	44	1623	94	226	63	810	21	1401	4	1434	1	60	5	2	0	5	113	68
OTU4306324	35	14	344	0	517	240	287	55	697	2	339	2	753	528	80	5	536	13	190	2	15	204	25	477	12	4	523	28	397	9	252	17	437	11	426	16	251	29	302	2	205	14	259	28	5	3	1029	97	144
OTUNew.ReferenceOTU3	0	24	0	9	0	0	0	61	0	13	0	0	1	0	68	112	0	193	0	51	25	1	100	0	65	202	0	28	1	148	0	509	1	6	5	0	0	858	1	985	0	225	2	478	1	452	0	361	0
OTU541531	91	56	483	69	720	788	710	784	1108	169	1901	51	1147	1100	657	311	1612	38	226	36	330	1606	219	2396	172	23	367	456	407	111	119	151	163	98	370	228	200	178	62	16	22	13	902	245	56	4	256	919	212
OTU1807238	232	288	3	324	36	3796	126	2187	3205	310	1030	97	868	836	974	2358	151	701	14	382	223	34	1411	129	2113	574	16	207	17	733	4	2963	1	107	32	222	1	771	1	114	0	19	5	52	1	8	17	30	1
OTU347853	222	187	0	111	22	1392	117	503	2358	35	389	42	638	94	168	218	77	316	98	208	119	83	374	217	315	187	112	58	61	160	9	241	70	78	29	71	70	189	16	194	79	66	237	188	0	59	1167	120	57
OTU252615	138	125	14	21	19	608	335	467	312	62	198	27	321	178	122	264	423	217	194	127	127	295	507	594	345	187	108	192	301	182	22	270	60	65	392	72	253	343	102	134	29	104	168	448	9	90	981	354	209
OTU91792	740	516	1414	150	1890	1254	385	539	475	313	281	126	133	773	684	495	1110	128	754	68	876	734	337	945	373	111	604	507	704	64	702	66	1783	435	571	373	1090	75	1064	12	475	9	636	79	48	11	1	339	107
OTU317827	100	77	35	48	48	645	45	274	352	32	111	45	248	113	118	135	126	165	32	103	100	113	291	209	215	139	117	102	86	138	26	227	61	48	88	74	107	176	42	220	48	81	223	242	4	85	1105	283	87
OTU171189	15	0	0	0	46	2309	265	5	8700	1	6553	0	4600	241	17	6	173	1	37	1	4	5	3	56	1	5	47	183	5	0	6	0	14	8	4	4	10	1	4	1	7	7	155	13	27	0	99	19	63
OTU232889	33	14	0	2	2	560	42	68	201	4	27	1	35	27	39	21	42	7	18	3	11	7	34	262	33	15	63	24	28	25	16	20	105	6	12	10	41	33	10	42	41	45	189	122	1	9	1127	49	68
OTU2361051	1	7	23	0	45	42	51	7	112	0	159	0	668	137	22	22	365	19	415	26	18	288	24	431	42	20	175	96	903	51	266	23	391	15	404	10	236	105	204	31	154	87	830	325	16	17	2187	394	189
OTU1109043	97	66	1046	28	1332	939	733	47	783	16	225	5	171	954	177	41	1415	20	279	15	55	763	46	860	14	11	900	84	782	12	579	62	1245	65	770	23	683	13	1198	8	799	3	188	63	6	1	276	26	114
OTU306016	36	54	0	52	0	158	6	286	74	14	6	10	2	30	21	119	25	99	4	109	30	13	127	28	119	137	10	37	5	102	0	165	20	21	5	13	16	209	1	478	5	111	60	236	0	143	604	54	3
OTU313980	23	2	83	2	120	238	185	10	167	2	94	1	86	262	27	2	604	5	83	0	8	232	6	174	18	6	335	15	176	2	64	0	184	19	106	9	56	18	41	5	35	20	409	15	2	4	1075	32	107
OTU4369319	114	66	13	12	60	622	62	211	2702	27	1052	5	1689	178	114	115	200	140	145	75	43	83	92	261	88	83	160	124	158	107	35	181	55	42	33	34	113	113	70	219	61	32	258	141	7	21	923	212	86
OTU341049	171	127	2744	31	3305	649	1462	120	92	55	21	17	14	558	70	83	642	9	387	7	177	921	146	296	53	35	640	150	517	18	807	3	1478	89	343	116	1127	24	1494	7	1097	6	663	18	12	1	0	33	101
OTU1137066	638	815	1	145	1	468	47	1776	41	415	33	118	72	160	708	242	39	23	7	56	3652	799	3054	195	184	31	0	724	40	35	2	44	1	2060	883	4055	348	179	8	2	2	3	7	66	55	0	0	598	21
OTU232905	110	32	783	17	1008	297	480	146	428	42	355	1	185	301	198	31	296	16	46	20	74	483	28	840	38	17	92	108	230	30	141	84	157	63	393	70	166	67	129	55	27	28	388	124	25	21	598	55	227
OTU535135	975	5807	0	3678	2	0	0	2231	2	745	2	1920	1	3	690	454	0	580	1	443	82	3	1291	0	671	1137	1	5	0	130	2	590	0	11	0	1	0	144	0	1091	2	7	0	2	0	68	0	1	0
OTU4325003	18	29	130	3	93	118	68	76	220	11	246	13	781	288	113	62	135	27	162	17	22	82	41	22	24	29	80	53	25	24	26	49	61	15	28	25	102	136	34	73	51	161	78	386	3	107	910	86	50
OTU263082	169	42	535	25	641	470	701	149	171	10	123	14	91	709	282	19	958	10	207	4	136	966	47	890	37	2	536	202	1426	19	892	27	1102	154	1293	198	1606	44	1521	5	603	9	355	168	13	0	319	131	315
OTU119137	88	175	0	66	4	2177	96	287	682	25	109	43	133	131	99	154	59	302	5	211	66	38	186	100	158	176	23	43	1	135	2	205	13	64	11	48	33	184	8	453	4	67	100	330	0	154	203	230	39
OTU322759	24	2238	1	1855	1	1	0	189	2	1159	0	2713	1	1	31	918	2	1106	0	1816	185	2	1055	2	543	1310	0	206	1	703	1	582	1	19	2	102	1	331	1	1368	0	75	0	74	0	836	0	11	0
OTU536800	297	130	246	76	355	361	368	584	180	125	125	80	89	349	376	435	375	190	291	103	1393	756	775	463	616	117	873	326	565	281	277	160	292	723	841	1588	425	259	103	21	150	28	330	156	31	5	105	298	152
OTU4327197	84	44	3	50	14	459	44	264	633	12	481	59	364	21	89	145	85	182	48	113	128	75	123	187	71	136	66	124	41	136	20	107	41	62	12	74	97	78	57	169	79	55	419	181	13	41	1083	257	95
OTU569884	10	18	1	1	28	1025	131	26	3990	4	1596	0	2026	92	11	29	210	63	116	39	10	36	39	476	57	19	120	207	106	75	7	0	10	21	34	9	30	87	34	12	0	90	33	159	36	11	92	69	50
OTU826306	327	218	0	233	11	1830	80	397	432	116	400	56	282	171	213	58	201	256	6	300	97	61	184	63	241	150	23	142	1	163	1	579	4	117	19	82	22	513	12	756	9	229	134	639	19	288	85	58	49
OTU231129	161	299	0	206	2	193	0	1103	14	71	7	88	2	64	112	215	16	310	0	246	182	22	766	14	616	178	1	195	1	265	0	847	8	89	17	82	10	414	1	725	1	211	13	763	0	187	54	74	4
OTU585911	7	7	49	16	95	363	684	95	99	16	41	20	19	262	8	31	35	28	49	8	20	92	11	14	7	11	95	0	75	18	128	0	32	5	14	11	32	4	22	1	202	5	45	5	1	7	1608	8	9
OTU354725	81	43	2	10	20	1004	101	236	1992	19	538	1	621	156	86	51	208	63	28	18	31	58	93	100	56	31	46	56	27	50	3	52	31	57	20	41	27	82	24	77	22	17	124	78	1	19	699	65	20
OTU1134862	817	809	0	309	0	8	0	4743	3	404	0	566	0	5	298	399	0	1131	0	551	160	21	1223	3	676	587	0	128	0	694	0	532	0	70	10	242	9	1539	0	1760	0	69	0	260	2	321	0	31	0
OTU252313	137	217	1	198	13	336	83	1729	313	225	523	202	594	308	889	939	289	229	68	131	1097	578	1250	327	733	217	28	1244	112	361	25	382	23	423	367	666	209	262	36	51	47	9	785	105	158	14	9	800	181
OTU262657	57	38	376	22	466	258	208	54	740	4	558	5	536	204	23	21	346	3	137	7	20	171	12	600	7	9	479	73	519	20	266	9	490	18	191	18	85	19	122	2	80	17	159	42	8	3	1031	183	115
OTU4365069	9	50	0	1	0	728	13	170	163	14	23	12	10	156	44	126	72	129	0	66	132	87	302	12	360	104	0	129	14	178	1	40	10	65	71	44	30	114	5	59	2	225	41	772	3	80	151	119	14
OTU3346542	3	10	11	15	11	6	2	13	12	2	7	1	18	4	4	9	9	14	11	36	4	9	0	5	3	20	6	0	6	4	2	8	9	2	5	3	14	6	4	244	5	11	3	28	0	105	208	1	2
OTU833871	8	65	0	13	0	0	0	236	0	23	0	76	0	4	133	345	0	404	0	171	70	54	403	0	550	364	0	129	0	235	0	536	0	2	6	7	0	1608	0	718	0	33	0	95	0	381	0	11	0
OTU112246	68	183	3	154	33	203	18	109	2103	28	372	148	666	48	45	342	46	157	1	159	48	21	718	20	672	84	9	610	1	429	0	60	7	40	11	24	11	435	1	80	7	266	21	926	19	146	191	24	9
OTU785565	191	31	2	23	10	1221	170	1924	1189	40	6415	64	2986	90	50	67	36	38	23	28	642	53	54	390	106	16	6	145	371	12	42	36	16	103	7	91	93	30	6	26	14	12	60	41	12	11	13	52	21
OTUNew.ReferenceOTU5	43	62	8107	14	6384	12	49	5	6	5	2	4	1	287	4	0	129	0	0	0	0	2	0	1	0	0	0	0	1	0	1	1	1	0	0	0	0	0	0	0	0	0	0	0	0	0	0	0	0
OTU591130	66	35	140	13	237	226	624	102	40	10	12	13	13	68	66	11	242	25	153	10	22	745	22	1137	28	11	302	267	2791	21	954	26	1103	46	1202	7	1567	59	1209	2	117	7	934	23	47	1	5	27	1332
OTU304520	49	52	0	62	1	21	0	343	3	8	1	8	5	13	40	65	3	100	2	73	30	26	39	21	77	128	0	42	1	116	1	119	3	35	21	4	5	211	0	264	1	207	14	455	1	125	168	69	10
OTU62928	51	50	1129	31	593	151	136	46	41	27	87	13	48	125	95	21	205	40	1581	19	44	101	31	343	17	34	1600	22	148	21	223	52	480	26	61	26	311	183	199	135	497	44	14	68	0	295	11	34	21
OTU754800	10	29	112	13	126	2204	1631	358	4013	80	2563	24	1901	1375	217	411	1325	32	26	16	148	552	35	12	31	23	16	99	27	6	5	6	5	40	48	38	55	8	27	1	29	2	10	11	50	1	1	30	4
OTU4325239	1	2	6	0	12	8	9	7	75	0	326	0	509	26	3	3	68	9	127	11	4	40	4	629	5	6	413	37	236	3	106	0	171	2	118	6	44	5	49	1	30	23	552	45	13	1	362	71	134
OTU4390091	1390	164	1	3	1	95	1	3985	2	2	1	5	0	34	2751	0	0	0	2	0	917	125	44	8	0	0	1	0	0	0	0	0	0	7169	694	212	54	17	1	1	0	0	0	2	0	0	0	10	0
OTU1915223	208	927	98	142	73	486	114	202	2229	486	566	261	861	195	264	467	379	226	129	159	398	152	739	76	301	172	122	527	274	113	66	87	139	172	99	191	282	81	160	111	52	55	369	155	68	19	434	388	88
OTU583231	67	13	52	6	61	171	137	96	58	7	31	0	99	134	76	40	241	55	69	31	19	206	59	254	101	15	110	66	93	36	41	16	105	19	88	15	148	51	56	25	43	23	244	88	3	4	1731	288	121
OTU315011	53	123	0	94	1	247	7	225	96	39	5	57	12	23	89	141	12	202	2	165	71	34	222	41	179	152	8	36	7	107	0	148	11	37	11	47	5	99	0	176	3	44	26	91	0	80	363	69	14
OTU4408386	30	29	1622	9	1864	264	1366	44	21	22	27	2	26	434	52	19	316	18	474	11	44	641	44	484	24	10	1828	46	545	11	1015	12	983	27	663	51	475	35	647	4	617	1	76	0	1	0	0	7	28
OTU228487	29	58	2	12	0	709	18	128	297	5	9	12	13	73	45	53	16	80	2	31	72	19	101	32	117	49	5	46	2	72	0	60	18	36	8	42	11	68	0	65	9	157	36	593	1	64	172	56	13
OTU79134	130	285	0	329	1	1027	6	673	93	105	1	187	2	106	221	613	19	849	3	638	143	32	645	4	569	749	0	53	4	466	0	1267	0	102	37	33	2	863	0	1663	0	66	0	887	1	126	21	51	0
OTU314474	3	3	7	1	51	433	102	29	1900	2	846	23	2166	26	7	13	24	4	138	20	4	5	24	385	16	3	164	202	90	8	57	21	62	4	3	15	51	5	29	8	50	8	170	11	17	3	921	48	25
OTUNew.ReferenceOTU6	184	100	921	73	1527	36	105	64	19	79	32	4	11	42	159	32	206	38	776	27	110	352	30	831	32	17	1778	31	567	7	760	28	1229	76	157	66	451	60	907	5	3216	0	280	0	1	0	0	59	16
OTU232223	25	127	1	53	0	17	1	415	5	10	0	3	2	5	93	147	1	110	0	144	72	26	80	2	118	171	3	48	0	208	0	301	1	63	13	44	5	374	0	579	0	147	8	324	0	275	28	89	6
OTU4400517	111	138	0	83	3	21	9	559	8	156	37	91	220	130	702	66	131	45	251	30	2355	527	288	438	395	120	89	480	400	201	43	313	21	1749	762	2153	1140	285	189	63	42	16	99	121	28	3	16	576	55
OTU4335825	120	195	37	99	27	150	32	387	96	268	39	118	14	210	201	339	174	319	44	192	138	133	563	123	451	269	39	126	32	187	11	833	40	113	44	152	136	331	41	198	32	69	118	971	3	22	455	393	51
OTU249226	16	5	0	4	3	88	2	50	10	0	1	5	0	11	46	8	85	11	4	8	11	26	20	30	9	11	10	14	8	19	12	26	26	12	9	8	199	58	56	48	61	96	665	345	1	21	577	908	162
OTU795623	2	0	0	0	0	48	2	8	316	0	34	2	38	3	1	0	8	6	117	6	1	4	6	730	3	4	357	6	45	5	79	10	57	1	2	7	5	3	2	1	13	6	58	11	0	1	556	37	38
OTUNew.ReferenceOTU7	473	1697	0	245	59	784	29	1690	622	1110	43	63	34	46	289	502	22	77	14	37	210	62	1272	34	811	62	1	1687	69	300	1	222	2	191	118	686	49	83	4	32	4	34	138	504	384	4	0	148	6
OTU796961	128	172	2	43	19	1449	64	474	5396	125	1162	192	2443	297	203	131	105	99	13	60	170	45	358	42	255	148	8	618	52	99	6	162	2	100	74	187	24	124	3	82	6	8	15	51	11	2	37	79	3
OTU4347253	25	37	24	8	42	2011	784	328	4858	110	1910	84	1325	1391	333	243	579	82	13	30	187	550	62	14	79	25	3	31	54	1	1	5	0	60	89	59	11	7	3	0	3	0	2	1	4	1	0	16	0
OTU1111111	95	117	84	27	131	88	40	170	68	36	18	5	36	45	82	237	178	105	38	52	67	95	113	113	127	145	52	37	87	111	65	64	141	30	69	38	68	152	72	127	28	99	199	293	2	133	337	122	65
OTUNew.ReferenceOTU12	229	255	0	130	0	84	0	649	8	29	0	52	4	11	134	486	2	340	0	92	142	10	873	0	602	230	1	81	0	469	1	440	0	37	2	23	3	303	0	879	2	97	1	241	0	432	59	19	1
OTU3490	40	31	15	24	26	1461	535	319	5780	51	1005	87	1206	2307	593	320	307	116	23	17	289	411	63	10	92	52	0	21	19	4	0	0	2	62	43	23	0	0	2	0	0	0	0	2	1	0	0	5	0
OTU1105792	3	0	10	0	26	383	89	10	405	0	598	1	773	46	3	0	33	21	55	11	3	45	12	411	5	0	71	47	83	5	38	2	65	2	13	1	50	13	13	3	36	58	498	144	7	8	1407	25	109
OTU556808	23	26	426	7	585	91	212	30	236	19	263	0	141	106	35	26	131	23	262	0	42	213	39	935	13	12	722	110	328	7	246	15	351	31	192	40	244	23	119	5	122	111	594	282	14	10	605	156	210
OTU316494	12	8	386	4	572	103	355	10	130	0	137	0	132	242	11	5	207	3	78	1	12	170	9	1036	2	0	310	136	2158	2	1549	34	1600	13	238	12	708	10	473	3	459	2	886	5	23	0	0	9	654
OTU4362093	682	258	140	56	186	516	96	435	163	105	31	91	49	324	260	349	417	261	172	146	345	189	873	116	774	258	390	339	173	272	128	105	73	418	156	1728	147	187	106	13	65	10	135	95	6	4	147	388	51
OTU1543166	114	148	29	65	48	120	35	1022	9	149	22	38	54	58	41	246	96	285	36	230	151	182	622	133	607	169	60	109	113	160	34	200	57	53	109	98	184	325	51	279	19	32	29	244	1	59	192	179	45
OTU124774	76	95	2	29	13	937	116	266	2310	19	427	43	760	96	85	152	55	208	29	97	56	33	227	135	162	78	68	68	43	118	11	48	24	30	27	53	52	137	7	76	16	32	68	139	5	18	293	168	28
OTU116756	33	197	0	148	0	21	0	395	15	18	0	102	0	20	24	232	1	324	0	293	55	34	108	0	158	303	4	92	0	246	0	429	6	48	26	11	9	418	0	728	0	245	5	632	0	370	38	64	2
OTUNew.ReferenceOTU9	186	28	1445	17	2617	228	673	182	137	34	88	6	6	187	221	33	263	5	439	5	35	618	66	566	13	5	1243	41	471	1	658	12	499	43	356	81	476	11	499	0	609	0	46	4	5	0	1	32	26
OTU1107534	335	65	0	6	0	84	3	1097	5	8	1	1	2	165	1511	1	27	0	0	2	4051	515	43	19	2	1	0	0	0	0	0	0	1	1929	855	3439	93	17	0	0	1	0	1	0	0	0	0	1	0
OTU817309	1	0	3	0	3	965	99	10	6766	0	617	0	1298	35	6	9	27	5	58	0	1	1	12	241	0	0	132	2	111	0	5	0	7	0	4	4	18	0	1	0	4	5	123	5	1	0	57	8	30
OTU761504	473	594	581	118	499	714	387	290	750	295	397	96	150	308	353	357	836	112	357	70	334	242	398	198	138	105	617	130	282	67	240	69	501	228	112	318	315	75	288	11	376	9	212	53	5	2	11	117	16
OTU126871	20	58	9	122	29	443	425	108	269	17	648	75	796	156	42	0	80	184	93	165	51	93	56	241	158	126	59	93	216	68	27	99	36	110	67	24	248	444	84	284	74	45	63	377	3	141	54	126	117
OTU262076	171	78	1657	61	2373	172	903	211	67	83	151	70	50	595	126	105	1059	34	434	13	69	453	49	202	53	12	1273	18	365	5	312	4	357	35	70	41	93	4	115	2	167	0	7	0	0	0	0	42	5
OTU230612	23	35	2	18	3	21	6	102	16	25	16	16	53	103	26	109	107	124	43	44	50	121	296	81	264	117	44	46	122	159	30	161	89	13	31	18	117	167	20	154	23	22	202	179	1	45	1018	413	45
OTU541327	215	222	33	102	67	473	95	555	1597	107	525	102	833	597	221	180	350	137	28	83	303	205	339	44	306	115	38	987	94	122	68	198	61	177	146	250	121	157	38	71	25	8	38	90	36	20	297	163	19
OTU229462	29	2	0	0	20	502	20	28	1835	0	451	0	698	48	23	2	60	8	67	3	17	2	10	162	15	9	67	36	100	26	32	7	33	6	0	7	63	3	17	16	25	47	231	111	12	1	418	35	85
OTU106179	39	36	2	16	4	820	39	142	228	3	7	11	17	52	66	51	17	30	26	1	16	22	48	88	40	33	13	17	11	48	12	65	68	26	3	16	15	136	6	99	7	70	91	219	1	43	632	75	24
OTUNew.ReferenceOTU20	21	24	949	13	1235	129	565	22	41	15	21	0	5	237	35	3	320	3	249	3	21	424	2	352	7	1	879	95	281	1	757	10	977	20	188	8	601	11	1011	1	781	0	552	7	12	0	0	4	343
OTUNew.ReferenceOTU15	7	9	2005	0	3100	38	223	10	17	12	9	0	9	111	13	3	181	2	125	1	14	280	17	127	19	1	380	11	203	0	500	2	702	5	243	23	419	9	702	1	613	0	124	0	2	0	0	0	29
OTU327275	30	49	240	32	248	495	282	39	538	11	201	8	455	263	77	124	528	77	185	54	20	603	81	431	59	47	419	36	277	25	218	87	333	33	374	13	186	36	161	77	65	3	219	30	9	25	427	25	102
OTUNew.ReferenceOTU14	289	1177	165	243	111	498	61	287	1972	625	421	334	315	231	323	689	360	305	62	190	315	143	622	40	321	256	122	376	93	148	41	137	116	156	87	251	70	98	71	93	61	9	71	67	31	13	12	85	19
OTU568731	101	6	55	0	64	80	107	123	42	0	29	0	79	136	49	3	337	0	86	7	50	220	51	256	14	0	122	23	319	2	96	24	169	25	253	54	186	6	85	0	68	10	255	49	1	0	1972	85	69
OTU230061	0	5	0	1	2	8	0	6	7	0	0	0	0	7	0	0	0	0	1	5	0	0	0	1	0	3	4	6	24	3	15	0	55	0	0	0	19	2	13	5	18	21	430	23	0	13	2539	3	17
OTUNew.ReferenceOTU13	6	8	11	5	25	1073	350	170	2179	19	1719	19	1957	1030	187	170	285	14	7	12	55	260	34	6	37	6	1	28	16	0	0	1	1	44	80	21	61	7	7	6	4	2	3	22	10	10	43	32	4
OTUNew.ReferenceOTU22	128	90	17	18	22	123	6	438	51	30	33	10	9	88	88	184	86	159	20	37	93	93	204	114	285	145	26	65	20	178	7	268	41	72	35	34	98	224	26	288	29	79	108	925	2	54	563	255	31
OTU92209	106	572	11	221	24	23	6	605	9	255	6	356	15	23	111	379	30	518	5	528	139	80	701	7	506	468	1	87	2	226	0	394	0	278	95	832	8	360	4	490	0	28	4	83	5	110	0	140	3
OTU101015	204	538	0	287	0	1	0	1279	1	147	3	190	1	13	158	563	0	602	0	364	82	49	405	0	533	487	0	98	1	269	0	375	0	50	31	30	2	403	1	792	1	65	1	215	0	169	4	34	0
OTU4032754	52	368	0	73	0	14	0	289	2	36	1	24	0	19	31	655	4	470	0	200	54	18	392	0	481	454	0	33	1	351	0	314	0	21	6	15	0	223	0	624	0	203	0	681	0	220	2	22	0
OTU92016	5	31	674	2	821	161	766	2	7	1	1	1	1	16	0	1	53	0	183	0	12	373	6	276	1	6	894	86	436	4	907	26	894	1	153	9	1086	2	1245	8	1424	0	146	2	4	0	0	0	58
OTU581343	20	85	0	77	0	3	0	210	4	23	1	162	0	2	17	154	0	198	0	139	38	8	96	16	114	207	7	45	1	174	0	159	6	18	25	22	1	187	0	303	0	167	5	325	1	115	70	48	8
OTU318309	258	170	208	57	292	119	333	636	13	103	9	52	12	97	232	75	160	11	86	3	281	704	163	301	211	3	63	142	470	24	205	69	212	432	577	927	1038	93	596	14	285	0	214	51	9	1	24	254	48
OTUNew.ReferenceOTU24	304	84	1	15	0	45	0	796	2	6	0	0	0	34	4026	6	1	2	0	1	405	161	2	2	2	3	0	6	0	5	0	1	0	2711	464	2169	30	0	0	0	0	0	0	16	1	1	0	35	0
OTU338106	0	0	0	0	1	0	0	1	32	0	6	0	18	2	0	0	0	23	3	0	1	0	0	20	6	1	6	5	8	4	19	5	18	0	0	0	1	4	0	7	13	1	25	3	1	9	770	23	0
OTU699385	243	893	0	241	1	228	0	552	1326	288	91	106	176	34	101	416	24	71	0	23	127	37	640	4	421	79	1	282	3	126	0	247	0	67	12	149	5	45	0	11	3	17	13	91	30	2	8	42	1
OTU1050284	44	10	460	11	430	170	258	15	47	2	26	8	26	116	94	3	117	10	52	7	39	200	7	50	32	5	96	38	14	8	2	0	4	49	49	31	31	0	16	1	8	2	19	12	5	0	10	27	32
OTU588835	50	203	0	59	0	13	0	363	5	202	12	65	7	19	257	571	21	290	10	172	192	170	971	63	486	284	13	117	23	274	0	74	2	120	107	331	80	82	3	53	0	34	25	140	2	20	65	508	36
OTU1112570	168	810	0	379	0	0	0	656	2	93	2	292	1	0	82	648	0	706	0	569	159	29	469	0	348	553	0	81	0	435	1	359	0	94	21	56	1	332	0	767	0	139	0	239	0	408	0	13	0
OTUNew.ReferenceOTU21	14	0	16	0	19	36	75	16	25	0	14	0	20	45	6	7	45	5	38	0	7	85	15	208	15	15	17	9	97	28	12	22	32	10	70	0	55	295	29	8	18	156	221	517	1	79	152	254	66
OTU165731	2	0	0	0	24	294	50	5	2573	0	955	0	1243	14	0	0	24	1	15	0	0	0	4	17	1	0	37	92	8	0	5	1	17	0	1	1	2	16	1	0	6	24	104	51	21	0	361	33	39
OTUNew.ReferenceOTU16	85	123	2	53	22	878	17	64	1673	20	489	31	470	124	32	72	102	73	24	54	14	6	113	12	86	38	1	67	3	64	1	54	5	10	0	2	4	44	2	184	0	31	0	240	1	39	111	2	0
OTU665088	2	0	5	0	6	8	7	0	15	0	77	0	191	23	2	0	53	5	133	0	2	98	11	150	1	3	49	21	293	15	38	0	92	3	42	5	40	0	38	0	31	8	87	31	5	0	1226	85	39
OTU4400016	402	814	7	276	12	348	9	688	746	295	311	153	470	66	138	588	72	178	19	92	500	78	583	51	864	146	2	350	88	126	0	300	2	131	31	266	109	109	10	47	7	15	32	50	40	21	4	36	6
OTU427025	11	23	573	7	636	100	392	10	68	7	37	1	524	99	13	12	169	11	273	6	14	299	31	570	14	3	737	66	516	11	476	80	848	15	231	17	777	45	1008	2	754	2	175	3	3	0	10	1	60
OTU689576	0	2	2	0	6	7	3	1	68	0	70	0	220	76	10	6	150	3	115	3	20	181	7	140	7	14	56	31	366	38	49	0	91	6	97	2	73	7	66	0	24	17	93	155	4	0	742	178	70
OTU833556	662	615	0	197	0	291	1	927	6	189	0	103	0	24	343	446	26	636	0	341	321	64	533	2	194	579	0	49	3	410	0	514	0	137	65	347	29	177	0	537	0	61	3	147	0	143	0	33	1
OTUNew.ReferenceOTU26	0	1	4	0	7	6	11	0	20	0	93	0	135	12	0	0	59	0	19	0	5	23	2	61	6	1	38	14	41	3	27	0	120	0	3	1	12	1	5	0	6	16	286	47	2	0	843	45	45
OTUNew.ReferenceOTU30	94	58	1461	25	2289	154	932	116	117	50	68	1	32	431	27	29	382	21	248	5	26	453	13	120	22	1	603	23	192	3	213	8	250	12	54	17	99	14	109	0	135	0	20	2	1	0	0	7	8
OTU227610	16	37	12	12	28	201	164	104	90	0	93	1	121	86	24	26	109	25	65	1	8	198	58	244	50	13	125	66	161	28	53	25	42	7	42	18	360	148	138	42	40	44	118	185	3	26	402	296	84
OTUNew.ReferenceOTU8	12	3	152	3	185	92	382	9	7	3	10	1	1	145	7	2	186	8	454	2	17	285	0	821	4	0	671	22	1159	1	500	10	342	0	113	1	208	4	1145	0	68	0	234	1	3	0	0	0	52
OTU551347	0	0	181	2	186	286	113	1	199	1	316	0	387	58	11	0	69	5	37	2	9	93	2	410	1	1	46	44	72	1	44	1	43	3	122	4	80	8	43	2	7	27	186	37	14	4	202	22	126
OTU232612	2	0	0	0	0	49	4	1	105	0	168	0	141	47	15	5	204	4	145	3	23	30	3	990	4	0	150	22	124	8	15	2	11	20	48	3	131	6	4	0	7	9	65	59	3	3	99	268	23
OTU4350498	17	2	24	25	79	1475	3393	152	1184	7	156	20	46	804	35	168	28	38	8	10	25	56	14	12	18	107	1	100	58	3	69	6	29	11	145	9	95	2	343	3	28	5	76	7	54	22	16	4	58
OTUNew.ReferenceOTU77	156	62	1003	30	498	130	345	43	18	17	5	6	26	161	55	25	98	8	479	3	90	183	42	195	29	14	303	48	164	6	166	24	265	44	68	148	1444	23	1293	8	778	0	284	4	4	0	3	17	69
OTUNew.ReferenceOTU543	11	53	4388	19	4065	39	229	7	11	0	0	1	0	16	0	0	53	1	0	0	5	112	0	0	1	0	3	3	1	0	0	0	0	0	0	1	0	0	0	0	0	0	3	0	0	0	0	0	0
OTU251878	0	12	23	2	112	109	88	19	2155	0	1644	0	2199	57	4	6	137	1	13	2	12	12	3	37	17	0	26	801	12	0	7	0	17	6	1	3	13	8	17	1	3	1	196	34	167	0	46	24	19
OTU551717	194	98	890	22	425	282	730	73	47	74	31	128	6	350	78	98	248	43	552	15	126	372	81	186	61	24	365	80	177	7	374	5	351	52	82	59	405	28	764	8	655	0	276	5	0	4	3	3	23
OTU632923	43	19	0	3	0	394	2	239	3639	24	1846	20	1372	93	85	35	23	8	16	6	9	11	34	77	37	12	40	61	5	14	1	46	2	17	4	21	4	10	1	5	0	4	6	38	3	1	20	22	2
OTU229118	26	400	0	386	3	28	37	148	7	175	10	430	2	60	92	224	89	394	7	667	61	71	145	48	172	244	2	54	167	167	0	486	2	35	339	20	18	216	5	678	1	76	74	138	4	196	3	42	155
OTU275936	0	2	43	0	169	76	43	4	1390	1	1038	0	850	131	12	6	220	15	148	6	7	39	6	565	1	0	94	274	549	0	145	12	210	10	8	44	180	0	95	1	104	5	550	18	35	0	317	162	81
OTU4458640	14	17	2	14	14	32	39	33	8	10	13	3	17	21	15	28	54	42	18	38	12	54	37	156	32	45	28	19	21	33	15	40	32	7	28	8	32	25	9	81	13	16	83	90	4	42	436	83	37
OTU709642	33	94	440	33	612	180	220	297	129	114	105	58	73	177	231	115	461	28	81	5	117	572	90	887	40	4	144	134	157	28	123	36	162	28	81	29	120	24	143	8	70	10	347	119	24	2	6	336	70
OTU135260	131	130	0	8	0	31	1	430	5	46	1	4	5	6	143	10	5	0	0	7	3037	73	133	37	55	9	1	210	5	23	0	19	3	624	128	2870	88	118	0	2	0	2	2	26	9	0	0	260	1
OTUNew.ReferenceOTU18	9	4	1	0	4	0	7	43	3	7	0	0	2	16	295	2	28	0	8	0	1618	65	18	14	0	0	6	9	16	3	5	0	11	652	291	5314	47	6	4	1	1	1	8	1	0	3	6	5	5
OTU575540	143	108	168	218	326	151	202	526	103	203	102	400	32	184	136	334	85	228	151	61	95	197	261	86	280	202	267	121	65	29	97	89	86	32	46	47	182	92	114	43	94	16	79	37	6	11	151	95	41
OTU4388412	7	8	411	1	574	30	256	11	21	0	1	2	28	18	1	2	75	5	172	1	3	154	2	249	5	0	538	26	201	2	352	20	844	1	66	0	872	3	1319	5	1300	0	209	0	2	0	6	2	104
OTU551207	25	42	0	3	0	21	2	80	2	14	1	11	0	4	5	45	3	44	0	43	26	23	139	19	144	46	2	27	4	118	1	174	9	9	22	11	24	169	1	124	6	22	36	113	1	34	190	156	12
OTU708851	2	0	5	0	6	71	232	106	6	0	0	0	2	68	54	274	102	87	11	3	48	294	35	4	16	64	3	9	73	26	19	2	28	27	55	3	9	139	24	96	33	34	12	69	4	104	5	21	8
OTU652209	363	172	104	117	138	316	90	317	18	115	3	217	1	10	126	211	26	496	104	310	265	66	521	91	408	504	182	176	72	357	37	226	26	65	84	263	71	138	115	480	11	3	4	12	0	110	0	24	2
OTUNew.ReferenceOTU31	29	66	0	20	0	106	0	181	3	19	0	85	0	0	12	57	1	179	0	379	313	1	680	0	86	165	0	128	4	336	0	1002	0	332	6	619	0	438	0	1400	1	257	0	194	0	243	1	3	0
OTU239948	14	82	1	46	0	14	1	41	54	41	23	179	14	17	49	371	2	505	2	370	690	11	1060	12	2257	553	5	292	1	412	0	234	1	84	19	123	0	77	1	129	1	3	0	9	0	19	4	5	0
OTU318624	273	354	0	61	1	24	0	751	8	30	1	13	0	10	137	342	3	255	0	146	144	45	253	6	244	183	0	41	0	285	0	119	0	76	14	52	0	124	0	414	0	122	0	323	0	207	35	17	1
OTUNew.ReferenceOTU160	14	0	4	0	5	46	10	14	36	0	15	2	34	17	25	4	76	4	11	0	5	57	13	34	9	3	13	21	15	4	5	2	10	13	29	3	16	2	16	10	4	59	74	147	3	21	67	91	61
OTUNew.ReferenceOTU37	22	134	0	37	0	4	0	88	0	15	5	87	22	22	40	99	33	166	5	131	80	24	217	20	176	121	4	37	10	78	1	53	6	42	4	66	3	51	0	45	6	44	100	136	0	41	181	95	24
OTUNew.ReferenceOTU495	91	43	545	34	255	68	118	47	20	34	9	18	6	30	47	52	78	46	996	10	75	211	58	340	70	25	463	64	144	11	251	14	434	55	195	68	886	19	479	5	896	0	340	8	2	0	2	9	100
OTU1123461	118	347	0	212	0	37	14	671	17	250	8	215	0	24	84	569	45	503	0	305	86	35	467	7	334	446	0	33	17	204	4	436	0	64	48	276	9	280	0	665	0	16	0	152	0	91	1	52	1
OTU117231	8	82	0	66	0	0	0	58	1	28	0	11	0	1	4	95	0	138	0	77	28	3	52	7	83	129	0	20	0	140	0	221	0	25	16	11	10	189	0	461	0	92	0	162	0	246	3	39	2
OTUNew.ReferenceOTU75	668	209	0	117	0	109	29	1507	7	381	1	196	0	37	451	167	8	88	1	186	129	177	78	21	96	12	1	46	15	123	3	7	4	220	247	1201	136	215	31	19	2	3	26	72	2	1	0	421	11
OTU267325	12	30	1033	1	1337	133	723	11	50	5	22	0	34	165	29	5	390	1	207	6	12	282	5	210	0	4	746	0	322	0	251	6	330	2	197	6	94	3	148	0	209	0	14	2	0	0	2	3	2
OTU103709	34	119	2	200	0	80	0	344	9	70	1	132	1	18	34	131	13	173	0	153	32	23	80	9	117	106	2	45	0	42	0	113	3	34	4	29	5	173	0	314	1	61	2	106	0	111	45	36	0
OTU4447845	22	23	0	0	3	547	27	106	587	1	20	0	50	24	14	6	21	2	34	5	12	1	29	54	23	7	33	2	17	8	6	0	1	4	2	9	2	14	3	15	1	10	5	18	0	18	149	14	3
OTUNew.ReferenceOTU115	27	15	3	11	15	751	304	137	2955	27	476	56	586	1011	286	189	212	58	7	24	151	215	49	2	27	11	1	16	12	6	1	0	0	36	24	20	2	0	2	0	0	0	0	0	1	2	0	3	0
OTU569946	37	52	2	0	6	244	12	98	39	1	6	19	11	31	57	59	7	48	6	31	79	28	89	38	173	55	1	91	13	81	2	4	7	29	18	67	64	51	8	32	7	26	186	82	3	73	298	429	104
OTU231973	0	0	0	0	0	0	6	10	0	0	0	0	2	5	0	15	2	22	0	2	1	1	20	8	26	4	5	1	2	0	0	1	5	3	8	0	1	31	0	9	0	30	24	193	1	11	186	9	2
OTU823845	36	165	0	68	0	90	0	710	473	128	137	143	227	69	62	198	11	141	3	128	166	7	268	19	492	107	5	69	14	141	2	171	3	22	3	120	7	289	1	221	2	16	14	53	2	51	62	34	3
OTU278770	162	263	0	108	4	99	13	478	84	382	20	247	2	64	463	796	30	118	4	72	154	95	719	21	625	173	8	274	10	213	5	218	0	83	33	219	34	315	0	35	0	6	7	88	14	24	0	27	2
OTU578750	12	2	226	2	305	190	661	8	10	3	1	0	3	77	1	2	199	3	44	0	19	501	1	155	1	1	216	27	432	0	379	4	558	10	356	3	428	9	819	6	511	0	150	2	5	0	0	1	146
OTU104864	11	1	335	1	357	40	203	6	58	1	51	0	55	109	26	5	162	6	161	2	14	277	11	721	7	3	470	89	587	7	569	14	715	9	368	2	364	16	367	4	390	2	141	0	6	0	0	8	90
OTUNew.ReferenceOTU38	169	29	16	0	39	211	35	292	36	4	26	2	8	123	733	15	82	5	89	0	373	435	28	379	30	5	200	54	100	9	76	2	115	468	226	856	463	52	137	3	24	4	77	98	6	0	6	929	50
OTU229691	63	70	0	10	0	0	0	190	0	5	0	22	0	2	77	71	8	167	0	24	89	9	94	13	59	111	2	36	0	303	0	72	1	33	17	86	1	213	0	59	0	24	1	30	0	61	113	18	1
OTU271012	10	0	313	1	386	104	382	10	20	1	8	0	1	276	37	1	355	0	73	3	18	369	6	163	3	0	161	25	483	1	373	22	434	17	564	10	499	4	576	2	286	0	100	1	1	0	0	1	106
OTU324381	11	16	333	4	480	189	810	4	111	3	40	0	19	307	10	5	374	2	105	2	11	632	3	184	2	5	447	24	164	4	226	7	465	7	290	3	274	7	466	15	391	0	71	0	0	7	9	3	36
OTU3310570	69	181	0	166	0	74	0	239	0	32	0	87	0	19	67	314	14	318	0	309	47	22	229	1	238	213	0	64	0	239	0	430	0	23	8	18	1	495	0	591	0	89	0	227	0	173	6	56	1
OTU318340	10	263	1	157	0	3	0	369	4	67	0	165	0	0	36	220	0	302	0	292	23	24	95	4	84	280	0	50	0	157	0	307	0	25	4	16	0	170	0	590	0	41	1	77	0	171	14	12	2
OTU307760	9	2	129	0	157	127	675	0	16	0	0	0	0	16	14	0	71	1	34	0	9	408	0	227	2	4	134	50	305	0	272	0	324	13	382	0	377	1	739	2	395	1	201	1	6	0	0	1	83
OTUNew.ReferenceOTU10	100	8	297	15	444	52	314	22	3	10	1	0	3	23	16	18	81	13	140	2	34	490	14	153	16	7	390	64	231	4	690	3	451	34	144	33	788	9	750	4	404	0	128	3	11	0	0	5	47
OTUNew.ReferenceOTU36	29	21	2	2	26	509	97	173	2979	18	578	45	953	683	82	217	163	21	4	7	77	110	29	2	34	12	0	9	0	7	0	0	1	13	35	4	2	1	0	0	0	0	3	0	3	0	0	3	0
OTUNew.ReferenceOTU281	65	145	0	29	1	599	19	217	95	61	6	11	3	46	69	60	12	160	2	123	59	29	177	7	89	129	8	35	0	78	0	79	1	53	10	27	5	157	0	130	0	54	3	175	0	96	93	50	2
OTU542548	191	148	118	52	325	179	343	549	56	75	20	16	1	58	88	184	172	31	73	6	143	135	628	103	236	19	40	231	79	104	27	2	18	81	44	281	153	10	356	0	37	2	505	13	14	0	1	50	54
OTU681073	1	0	0	0	2	13	6	0	490	0	134	3	81	5	1	3	7	0	9	0	0	0	0	48	0	0	35	89	6	0	5	0	9	0	5	0	8	0	0	0	6	5	34	8	19	1	111	21	12
OTUNew.ReferenceOTU245	79	1139	0	166	0	0	0	424	2	658	1	1372	0	1	259	1092	0	144	0	367	20	0	347	0	81	22	1	9	0	32	0	13	0	3	1	1	0	182	0	0	0	3	0	20	0	2	0	3	0
OTUNew.ReferenceOTU43	211	576	0	106	1	30	4	722	5	117	4	166	1	36	28	237	10	224	0	49	46	10	783	0	247	481	2	125	0	78	1	227	0	2	6	9	0	70	0	248	2	4	0	16	1	186	0	1	2
OTU676181	319	432	0	327	67	447	46	704	167	242	50	99	32	73	399	168	35	144	8	139	219	30	241	32	223	76	0	67	17	103	2	211	4	207	23	334	11	125	2	46	1	7	8	94	6	15	2	19	0
OTU228443	31	227	1	144	0	0	0	417	0	47	0	127	0	1	40	92	2	138	0	145	50	20	107	6	77	144	5	40	1	85	1	127	3	20	3	16	3	131	0	90	3	29	1	64	0	22	87	25	3
OTU561467	0	2	7	0	95	74	44	11	1817	3	915	7	2074	25	4	13	64	5	7	0	4	11	8	13	1	1	11	359	10	5	9	8	5	8	2	9	9	0	1	0	5	3	88	12	96	0	36	22	14
OTU4327352	5	61	419	8	539	111	316	13	26	21	0	10	10	12	6	20	88	11	472	21	129	334	21	301	15	4	826	23	282	13	444	12	525	45	418	41	67	19	47	2	84	0	40	3	0	0	0	8	4
OTU778530	0	0	0	4	0	0	0	1	438	2	1035	0	2114	311	4	34	280	0	10	3	0	5	3	24	14	8	8	5	3	5	1	3	0	0	0	0	2	6	0	3	0	1	32	6	0	2	341	3	1
OTU4369122	10	8	247	0	242	39	181	6	35	0	14	0	1	144	5	0	76	4	41	0	10	149	7	153	0	0	117	67	456	0	258	0	324	11	167	5	697	6	730	4	107	1	345	4	13	0	0	13	196
OTU746239	3	0	10	0	24	0	19	21	0	0	3	0	0	7	0	2	5	0	1	0	3	16	7	29	0	5	8	1	8	2	0	0	10	2	31	0	21	7	11	0	18	0	18	0	0	0	241	33	14
OTU549386	7	8	287	0	327	27	83	7	44	11	45	0	66	33	2	5	66	55	375	7	6	73	8	1067	1	1	538	1	804	0	339	25	439	1	21	2	263	6	283	4	497	0	30	3	0	0	10	2	2
OTU509548	355	141	0	82	1	271	15	1110	3	60	0	58	0	60	693	84	20	128	1	80	243	100	211	20	119	166	0	48	1	80	0	131	0	244	142	553	28	94	0	49	3	32	0	181	0	11	0	124	7
OTU252268	126	403	159	56	122	428	231	150	1001	255	95	89	77	90	76	127	150	67	25	39	189	75	358	16	158	76	69	199	39	59	27	65	58	90	45	110	39	58	32	17	24	7	82	22	17	2	1	28	10
OTU346694	21	17	0	7	0	138	3	49	31	13	3	11	5	17	24	11	0	18	6	16	2	9	12	3	18	15	9	3	6	28	2	80	9	11	6	5	15	23	6	49	8	8	50	16	0	14	352	8	6
OTU831845	69	803	0	296	0	1	0	186	1	363	0	346	0	2	98	413	0	897	0	1048	14	0	181	1	77	535	0	2	0	24	1	136	0	11	3	3	1	41	0	73	0	12	0	9	0	13	3	1	1
OTU344629	13	73	0	45	0	19	0	325	181	142	142	52	238	5	36	1213	6	192	9	42	44	5	366	47	468	78	24	116	10	233	2	891	3	19	0	33	5	199	0	11	3	1	3	27	0	1	6	15	2
OTUNew.ReferenceOTU114	2	3	19	0	21	742	371	182	1550	8	612	14	685	829	66	283	66	28	1	10	77	97	42	0	46	15	2	9	4	2	0	7	0	38	32	11	0	0	4	0	0	0	0	0	2	0	0	2	0
OTU320696	63	71	0	45	0	683	9	302	33	17	1	47	9	46	86	67	23	144	3	129	36	18	127	23	166	105	0	22	0	121	0	123	1	31	9	10	8	205	0	340	5	29	3	306	0	39	138	18	1
OTU262661	0	0	0	0	0	0	0	0	0	0	1	0	5	0	4	0	3	1	5	0	0	0	0	15	4	0	14	0	2	0	1	0	23	0	0	0	0	0	0	0	0	1	85	9	0	0	446	7	16
OTUNew.ReferenceOTU17	7	525	0	329	0	0	0	43	1	376	1	1059	0	1	0	126	0	455	0	537	0	1	26	0	23	628	0	4	0	16	1	907	0	0	0	0	0	64	0	645	0	1	0	0	0	24	0	0	0
OTU1121123	154	338	23	458	62	77	90	220	66	45	153	113	281	91	342	82	254	19	47	64	107	236	27	245	23	19	74	66	302	0	43	6	84	113	263	131	248	15	206	1	45	2	79	31	9	1	2	90	113
OTU4306293	2	0	0	0	1	453	34	1	3535	0	741	0	489	18	1	1	1	0	6	4	0	0	0	125	0	2	60	16	7	0	1	0	0	0	0	0	10	1	0	0	1	1	36	7	8	0	11	2	20
OTU312974	31	92	0	39	1	0	0	232	1	11	0	10	0	4	31	99	0	213	0	93	44	7	82	0	110	133	2	43	1	142	0	137	0	19	5	25	0	196	0	270	0	105	0	125	0	138	11	21	0
OTU836974	0	0	0	0	0	0	0	7	0	0	0	1	0	0	1	2	0	21	0	10	3	1	3	0	24	49	0	4	0	27	0	31	0	0	0	4	0	37	0	190	0	42	0	13	0	474	0	0	0
OTU242050	137	169	7	116	4	21	4	392	2	68	0	77	1	14	93	169	12	135	5	140	59	60	101	8	100	210	8	34	3	64	1	232	4	24	13	95	13	66	1	192	0	10	4	17	0	29	68	22	3
OTU315098	204	1396	1	950	1	0	0	475	0	640	1	881	1	1	65	180	0	190	0	384	2	0	47	0	24	198	0	0	0	12	0	38	0	3	1	3	0	1	0	20	0	1	0	7	0	0	0	0	0
OTU327084	111	344	6	125	30	140	326	362	115	165	108	48	47	63	143	373	50	184	3	93	62	77	220	43	222	156	2	374	35	40	3	85	4	48	9	139	89	100	27	18	7	8	61	146	25	13	0	40	10
OTU813271	4	12	0	47	0	53	0	803	655	13	858	41	795	19	67	9	0	3	0	7	12	3	14	3	147	7	8	13	0	72	0	127	0	0	0	5	0	14	0	18	2	0	9	11	0	1	47	3	0
OTU351207	147	90	13	38	9	20	45	297	12	21	9	12	12	69	106	116	85	75	42	36	84	144	160	78	81	47	35	49	143	64	32	65	19	42	310	80	106	81	25	119	4	22	10	186	0	20	32	232	16
OTU4418192	92	372	0	201	0	0	0	388	2	37	0	79	2	8	30	253	0	159	0	157	8	6	170	1	116	267	0	8	0	178	0	315	0	16	0	26	1	319	1	653	1	76	0	237	0	233	0	5	0
OTU559632	55	13	0	7	2	567	9	446	1404	27	910	5	1265	31	21	63	59	14	35	10	96	87	70	25	71	5	16	64	20	20	2	6	1	24	28	30	15	6	3	2	3	5	9	23	5	2	0	2	6
OTU560293	74	53	15	50	32	28	23	10	5	19	4	8	57	12	29	0	55	3	175	4	23	64	9	345	22	4	94	424	828	15	119	12	132	26	218	148	814	8	196	0	28	0	546	12	59	0	1	12	260
OTU1132833	30	21	411	35	525	29	168	23	40	53	6	13	7	48	23	27	17	21	45	0	16	126	15	92	35	22	190	23	73	1	179	32	214	9	26	11	380	22	598	6	1360	1	55	1	1	0	0	3	8
OTU849612	26	229	0	301	1	0	0	516	1	65	0	165	0	8	22	257	0	361	0	257	58	11	208	0	165	230	0	14	0	156	0	329	0	23	8	16	0	255	0	566	0	20	0	92	0	47	0	15	0
OTU3017479	3	10	69	5	24	23	91	38	20	0	21	3	7	20	36	103	96	1	92	4	22	230	54	104	12	2	81	40	454	10	146	2	96	8	340	2	651	7	145	0	25	1	800	4	4	0	0	7	155
OTU261198	10	1	174	0	193	90	308	6	137	0	60	0	162	163	15	7	252	2	53	0	9	416	6	299	3	1	244	79	270	1	297	1	330	6	608	0	202	0	338	0	131	1	27	0	1	0	15	5	46
OTU4475224	0	0	0	0	6	2	22	1	6	1	22	0	7	14	0	0	15	2	28	0	8	36	2	21	3	0	44	20	43	5	17	0	23	3	21	1	19	0	3	2	10	5	235	11	7	0	87	10	23
OTU142393	9	2	226	18	295	25	78	17	79	3	41	37	114	124	11	11	152	6	72	6	15	237	23	311	10	4	138	32	275	2	200	30	479	13	221	15	268	30	357	23	336	3	72	21	2	1	34	8	29
OTUNew.ReferenceOTU46	19	15	314	5	376	61	322	14	64	6	17	0	38	264	36	17	274	10	103	9	13	231	22	103	4	7	474	33	150	6	225	27	396	20	299	11	143	1	135	2	75	0	29	1	1	0	6	3	12
OTUNew.ReferenceOTU205	87	106	137	48	244	256	119	131	74	134	67	52	12	177	91	195	331	58	77	35	80	125	200	48	85	55	155	84	157	30	186	2	325	68	50	74	201	25	147	6	331	0	110	28	5	1	3	77	11
OTU667312	51	56	201	8	256	356	546	70	82	30	22	4	10	79	125	11	552	11	58	1	57	491	21	87	4	1	128	200	170	9	94	3	123	107	158	44	123	9	127	0	176	0	60	11	13	0	0	5	25
OTU403231	15	2	396	0	488	68	191	17	14	2	13	1	0	101	16	2	143	0	59	1	11	208	0	163	0	0	244	19	163	0	272	2	403	8	80	0	186	3	331	10	410	0	170	0	1	0	0	2	136
OTU314251	204	207	1	148	13	53	2	312	5	160	1	71	0	11	219	214	9	504	0	409	69	27	111	3	75	484	4	34	0	139	0	77	2	58	14	71	8	25	0	321	0	2	0	16	1	183	0	15	0
OTU711271	103	70	4	11	16	30	14	307	5	25	1	14	0	33	54	93	35	111	4	56	96	36	145	19	62	122	10	23	15	95	20	131	18	27	28	78	30	47	10	175	3	11	31	25	0	29	270	21	10
OTUNew.ReferenceOTU286	74	102	1	34	0	135	2	464	679	72	67	13	138	17	57	329	21	14	2	3	313	22	366	1	166	26	0	163	8	52	0	111	0	114	38	284	1	70	0	14	0	16	9	62	13	0	5	24	0
OTU812914	0	0	27	0	44	27	35	22	5	5	1	0	0	6	1	2	35	0	25	4	23	66	1	63	0	0	47	88	80	1	60	5	150	6	142	9	264	11	182	2	437	42	1412	49	9	0	139	1214	299
OTU320613	12	50	0	27	1	24	0	123	16	26	3	66	0	2	21	64	6	43	0	25	17	5	37	14	22	71	0	18	1	16	0	36	8	11	3	15	7	24	0	75	0	17	10	26	0	22	149	9	2
OTUNew.ReferenceOTU33	39	112	0	127	0	6	0	160	1	45	4	103	1	1	24	91	7	187	0	122	129	19	524	0	361	95	0	113	0	103	0	37	0	14	9	18	0	56	2	328	0	14	0	25	0	226	0	0	0
OTU4357330	6	4	3	5	10	20	111	23	101	6	156	1	27	34	21	22	29	2	27	1	9	184	48	65	34	25	9	11	112	16	67	5	34	9	133	0	57	16	18	28	4	1	77	1	3	35	60	10	13
OTU2380278	32	8	0	1	1	833	55	33	2018	0	43	0	15	98	34	12	38	0	0	6	5	7	22	8	19	0	0	54	0	8	0	5	6	7	1	1	2	15	0	8	0	20	0	169	0	9	45	12	0
OTU557602	194	150	143	79	121	249	171	142	212	37	122	14	112	263	187	75	345	22	68	10	105	182	90	94	63	10	127	207	125	6	54	27	90	124	127	68	110	7	64	1	103	0	54	24	8	1	3	39	16
OTUNew.ReferenceOTU49	72	29	0	6	0	264	50	115	127	9	130	0	41	179	80	63	135	34	0	7	32	320	45	0	67	10	0	1729	0	74	0	40	0	16	45	2	0	10	0	20	9	5	23	108	308	3	1	14	10
OTU140967	164	277	2	105	4	40	0	307	223	136	396	92	304	26	98	271	11	53	1	30	243	16	241	16	275	61	0	51	5	86	4	217	6	48	7	223	7	67	0	20	0	2	9	16	4	8	6	10	0
OTUNew.ReferenceOTU269	6	1	19	0	5	460	58	67	886	5	924	11	1101	185	62	55	143	5	1	0	13	57	14	4	6	2	0	9	1	1	1	1	0	22	26	8	23	2	0	4	0	0	4	3	0	7	8	10	2
OTU320447	8	190	0	184	0	0	0	60	0	80	1	112	0	0	0	232	0	291	0	199	37	0	123	0	84	254	0	34	0	64	0	448	0	2	0	11	1	169	0	521	0	16	0	48	0	100	3	19	0
OTU4383664	86	162	0	17	0	5	0	199	0	29	0	7	0	20	1301	26	11	0	0	0	552	161	69	2	14	2	0	0	0	4	0	0	0	1588	170	274	67	14	5	0	0	0	0	1	0	1	0	3	0
OTU137356	36	65	0	53	0	214	2	185	29	22	4	75	4	33	61	68	21	117	0	76	52	31	120	1	60	41	0	24	1	109	0	44	0	32	8	27	2	126	0	188	0	43	3	141	0	85	54	27	2
OTU312248	1	8	79	1	74	122	473	5	20	0	3	0	28	85	22	3	369	0	27	0	12	755	0	213	1	0	55	52	213	0	120	0	137	20	424	0	390	2	308	3	41	0	143	1	3	0	5	8	165
OTU318061	2	141	0	230	0	0	1	20	1	52	0	245	0	0	6	58	0	312	0	286	5	2	29	0	64	262	0	15	0	106	0	168	0	0	4	1	0	125	1	390	0	60	0	34	0	189	0	3	0
OTU548737	6	0	4	0	4	34	7	0	45	0	70	0	224	18	2	3	21	3	10	2	0	9	0	49	2	0	12	6	16	0	0	0	3	0	0	0	10	13	0	0	0	41	9	184	1	0	28	33	10
OTU242585	30	7	148	12	163	21	61	6	19	1	29	6	11	116	71	8	178	6	65	0	13	251	10	356	1	0	224	8	225	0	217	8	310	19	524	21	350	0	315	0	135	0	41	9	0	0	15	17	48
OTUNew.ReferenceOTU25	270	137	0	84	0	5	0	942	1	75	0	141	0	7	204	2	0	30	0	119	688	28	24	0	8	25	1	0	0	0	0	2	0	123	20	1788	0	0	0	6	1	0	0	4	0	0	0	0	0
OTU237689	0	1	0	0	0	0	0	3	0	0	0	0	0	0	0	13	0	12	0	8	0	0	0	0	4	4	1	0	0	14	0	5	1	0	0	0	0	9	0	4	0	5	2	6	0	2	133	4	0
OTU110119	9	983	0	634	0	0	1	35	1	423	0	724	2	0	8	285	0	493	1	581	0	0	32	1	38	284	0	0	0	1	0	75	1	0	1	0	1	8	1	39	0	0	0	3	0	0	0	0	0
OTUNew.ReferenceOTU319	17	40	584	11	915	63	221	9	55	7	117	0	48	164	13	7	257	1	95	0	8	182	5	172	13	0	233	3	99	0	109	0	80	6	48	4	27	5	28	0	29	0	21	3	1	0	1	2	11
OTU4036860	13	10	0	17	1	110	7	478	2193	39	164	22	933	13	56	18	5	37	0	18	25	1	32	2	64	19	0	54	5	16	0	8	0	20	3	7	6	19	2	10	0	0	2	6	2	2	4	3	1
OTU4432819	10	22	0	18	2	81	2	91	351	35	323	24	352	44	47	96	17	99	6	41	32	11	48	24	116	67	14	47	0	176	0	210	1	8	1	37	9	160	3	67	1	7	26	25	0	11	49	158	14
OTUNew.ReferenceOTU431	264	249	0	120	24	419	85	420	271	135	215	49	52	51	107	55	77	31	7	39	92	22	219	57	83	14	0	363	26	47	0	107	0	114	23	93	26	57	5	19	8	5	44	122	49	0	1	20	1
OTU228252	4	0	0	1	0	0	23	1	0	0	2	0	5	0	0	0	10	0	0	0	0	15	0	11	0	0	0	0	7	0	1	0	3	0	4	0	17	6	13	1	7	7	63	23	0	0	121	141	24
OTU581843	31	20	0	3	0	373	9	76	64	22	1	0	25	33	122	2	55	1	0	1	607	244	36	19	52	5	1	92	16	15	0	11	0	202	219	534	101	48	3	7	0	14	9	43	5	12	51	220	22
OTUNew.ReferenceOTU63	10	62	1	31	0	0	0	172	1	19	0	7	0	0	11	91	0	135	0	76	16	0	48	2	22	84	1	19	0	66	0	118	0	9	4	13	0	63	0	152	1	17	1	19	0	72	22	0	0
OTUNew.ReferenceOTU58	29	202	0	304	0	75	0	11	13	93	0	524	0	6	5	291	0	484	0	351	2	2	199	0	101	516	0	2	1	101	0	227	0	2	1	1	0	64	0	396	0	1	0	15	0	38	3	3	0
OTU4393300	73	804	0	152	0	0	0	488	0	429	0	216	0	0	1	207	0	157	0	232	1	0	90	0	13	132	0	13	0	53	1	392	0	1	1	4	0	298	0	166	0	25	0	34	0	71	0	0	0
OTU206605	3	5	137	5	211	74	213	6	164	2	175	6	546	43	3	3	69	0	142	0	2	366	4	310	6	2	250	41	264	3	108	1	218	11	160	2	144	3	137	1	60	0	63	3	2	0	1	0	28
OTU308318	7	80	25	91	39	52	159	70	8	25	0	122	2	13	7	41	61	94	3	168	22	217	49	124	38	46	14	52	498	30	33	102	13	12	149	17	64	52	51	119	0	45	133	66	9	88	0	14	240
OTU674956	32	30	46	18	47	20	89	95	13	15	6	0	13	67	19	2	133	7	14	9	15	95	14	79	18	20	99	10	101	48	71	48	107	5	106	7	35	38	41	69	12	9	50	16	2	7	183	6	15
OTUNew.ReferenceOTU330	33	52	2	11	3	264	7	127	1644	28	263	70	498	56	35	22	11	89	3	46	38	14	125	7	88	103	1	116	4	51	0	86	0	18	9	65	4	25	3	94	1	6	4	26	2	4	17	15	0
OTUNew.ReferenceOTU336	83	634	0	319	0	4	0	86	0	153	1	462	0	3	23	284	0	271	0	246	64	5	167	0	102	364	0	21	0	53	0	179	0	14	4	77	0	117	0	164	0	20	0	20	0	52	0	3	0
OTU264786	33	31	16	2	37	127	83	61	438	22	407	47	281	30	28	85	31	7	37	5	32	23	143	72	70	13	40	69	59	2	27	0	40	13	5	29	203	16	38	0	58	7	500	12	7	0	85	147	66
OTU234071	14	16	0	10	1	59	0	69	16	5	4	19	0	12	15	6	5	10	0	14	14	1	9	11	28	28	2	12	0	15	7	17	3	19	6	8	2	33	0	17	0	31	24	67	0	22	133	5	6
OTU809876	74	86	1	68	14	35	31	327	7	50	4	43	0	21	50	105	65	135	3	48	53	40	206	26	102	75	25	59	3	59	3	123	5	30	40	176	8	89	3	250	1	7	12	10	1	43	24	74	3
OTUNew.ReferenceOTU81	17	12	32	8	50	51	37	18	97	5	49	6	82	116	22	4	104	1	8	2	32	66	27	70	21	0	16	45	131	1	19	0	7	29	69	42	40	8	12	0	3	7	159	80	11	1	11	89	199
OTU3369729	66	286	0	242	0	8	0	202	0	189	0	299	1	0	82	266	2	182	0	363	51	18	118	0	77	200	0	25	1	150	0	171	0	27	4	70	3	166	0	184	0	23	0	58	0	33	0	110	2
OTU975158	49	236	0	82	0	0	0	152	0	114	0	218	0	0	17	142	0	48	0	89	16	13	445	0	110	84	1	66	2	46	0	93	0	6	5	48	5	85	0	224	0	13	0	16	2	61	0	78	3
OTU337675	21	12	333	12	429	84	105	29	80	6	59	52	59	40	7	7	25	14	113	11	13	151	15	218	18	4	298	32	116	5	145	3	242	7	48	8	186	17	291	3	221	1	29	21	0	0	11	3	9
OTUNew.ReferenceOTU123	0	0	0	0	0	0	0	6	0	0	0	0	0	0	0	1	0	19	0	5	1	0	2	0	1	32	0	1	0	24	0	214	0	0	0	0	0	61	0	315	0	5	0	0	0	69	0	0	0
OTUNew.ReferenceOTU19	111	113	16	4	35	49	25	376	16	32	5	24	6	37	64	191	67	96	6	18	195	44	500	2	137	104	13	55	5	116	12	51	12	40	30	134	13	28	8	103	11	20	39	65	0	40	89	42	0
OTU1045015	78	165	0	106	2	10	1	353	6	213	25	195	63	38	46	301	112	119	40	155	68	112	283	98	134	67	65	66	46	79	63	148	66	30	84	127	84	64	28	50	13	3	42	3	0	4	37	105	9
OTU324366	1	0	0	0	1	2	18	0	0	0	1	0	0	0	0	0	0	0	0	0	0	3	0	0	0	0	0	9	22	0	7	0	5	0	3	0	36	0	14	0	1	0	1	0	0	0	0	1	0
OTU4376515	43	229	0	82	0	0	0	240	0	75	0	104	0	0	1	77	1	178	0	139	6	1	63	0	52	297	1	18	0	182	0	255	0	5	2	37	0	564	0	559	1	137	0	242	1	198	0	41	0
OTU354695	7	20	0	14	0	0	2	25	0	4	0	21	0	1	0	14	3	25	0	2	0	0	18	0	10	8	0	16	0	17	1	60	3	5	0	5	1	19	0	44	0	2	14	7	0	14	182	7	2
OTU249224	0	4	0	2	0	0	0	3	0	0	0	0	0	3	1	0	0	1	104	4	16	4	8	165	5	6	578	8	6	3	2	0	1	14	17	508	2	0	0	0	1	2	6	7	0	4	4	3	0
OTU144057	3	14	1	4	0	13	8	33	43	0	66	0	138	40	7	26	16	5	0	5	17	212	35	28	29	21	4	48	169	31	46	10	14	28	60	41	51	28	21	28	6	20	143	54	7	13	4	41	51
OTU227701	7	2	0	2	0	0	1	19	2	0	0	1	0	1	4	15	0	24	0	13	11	13	111	0	61	31	0	29	1	48	0	12	4	8	16	6	5	61	0	42	0	24	9	87	0	25	48	42	4
OTU347310	0	0	1	0	0	10	8	0	547	2	764	11	1913	11	4	24	39	2	5	6	0	8	0	1	0	0	5	2	7	0	4	0	1	0	1	0	2	2	1	1	3	0	12	0	1	5	3	8	0
OTUNew.ReferenceOTU508	24	31	278	21	192	284	786	45	17	44	17	8	11	275	42	33	352	14	148	5	54	612	17	67	17	9	123	17	16	0	9	0	21	12	30	8	53	4	71	0	88	0	55	2	1	0	0	4	2
OTUNew.ReferenceOTU40	67	54	13	93	11	10	31	356	3	9	3	41	4	28	12	65	30	73	29	60	6	62	35	10	57	59	8	26	26	20	1	95	0	6	4	10	27	158	6	63	0	20	6	131	0	71	3	110	13
OTU837604	801	2259	0	537	0	128	3	74	0	46	0	6	0	0	40	1	0	0	0	8	0	0	41	0	2	3	0	0	1	0	0	3	0	0	0	0	0	2	0	0	0	1	0	0	0	0	0	1	0
OTUNew.ReferenceOTU23	67	2	0	0	1	964	4	13	1079	0	74	0	44	129	7	6	9	5	0	0	5	3	25	4	33	0	0	113	0	3	0	1	0	1	0	1	1	5	1	0	0	20	7	55	8	1	108	4	1
OTU1035774	0	0	2	0	2	1	14	1	3	2	1	0	0	2	1	2	8	2	30	0	6	38	4	9	1	3	9	2	3	1	4	0	35	3	0	10	0	1	0	2	9	8	179	7	1	1	2136	134	36
OTUNew.ReferenceOTU28	6	5	225	2	234	90	51	5	17	6	11	0	100	41	15	1	115	1	37	0	7	56	0	148	2	0	42	36	235	11	142	1	197	8	271	30	238	0	80	3	16	1	187	2	1	1	132	57	36
OTU151344	0	0	0	0	2	0	0	0	0	0	2	0	5	0	0	0	0	0	14	10	0	0	0	76	0	3	45	2	32	1	9	0	56	0	0	0	0	0	0	0	6	4	113	4	1	0	280	17	9
OTU353181	19	39	0	47	6	39	4	122	52	5	23	29	19	3	44	151	5	126	2	81	28	13	50	3	32	152	0	19	0	71	0	163	0	17	4	27	3	57	0	208	3	18	28	14	0	56	44	42	12
OTUNew.ReferenceOTU489	141	30	5	11	7	129	20	495	3	47	3	63	11	25	96	41	17	54	20	45	145	130	167	32	269	58	61	66	72	74	35	40	8	143	165	359	53	82	16	40	5	3	7	32	3	5	0	243	3
OTU581028	12	149	0	119	0	0	0	101	0	78	0	25	0	0	12	170	3	236	2	164	55	8	59	0	106	145	0	17	0	83	0	198	0	19	15	27	0	165	2	226	0	50	1	158	0	98	0	46	0
OTUNew.ReferenceOTU11	0	15	68	2	102	91	278	11	3	0	11	1	2	26	1	3	150	3	110	3	2	162	2	40	0	1	329	15	197	0	373	1	450	1	2	2	157	6	356	0	720	0	50	1	0	0	0	11	21
OTU831907	23	43	0	10	0	26	6	155	2	23	2	41	2	1	30	99	1	99	0	77	38	10	188	2	149	97	0	36	3	118	3	71	2	25	6	19	14	58	0	74	0	10	6	87	0	15	27	85	4
OTUNew.ReferenceOTU44	11	0	0	0	0	6	0	101	0	0	0	0	0	22	1267	0	19	0	3	0	26	407	0	39	0	0	0	9	5	1	0	0	0	525	548	110	56	5	3	0	1	0	0	25	1	0	0	607	9
OTU270517	100	41	21	24	38	233	46	91	627	13	200	17	207	60	131	39	135	25	20	10	72	83	46	44	34	16	43	112	66	30	16	21	32	50	45	89	85	38	41	21	27	2	39	72	10	2	32	67	15
OTU579236	18	54	0	35	2	42	8	115	1	27	3	43	5	13	32	44	4	77	0	45	37	28	193	2	274	117	2	62	7	83	0	66	0	34	25	37	13	151	5	193	3	15	23	53	0	87	43	26	3
OTUNew.ReferenceOTU128	4	7	14	4	41	457	178	118	705	41	933	2	405	192	81	61	236	14	6	9	15	84	11	1	0	2	9	37	4	0	1	0	2	14	8	5	14	4	12	0	11	0	5	1	11	0	1	12	0
OTUNew.ReferenceOTU47	24	28	0	30	5	97	11	70	529	5	118	6	201	45	71	55	64	21	0	22	13	6	42	6	62	32	4	55	0	33	0	33	4	7	4	2	7	49	0	38	2	19	19	78	2	48	47	22	4
OTU137292	44	32	0	6	0	38	0	284	4	6	0	3	0	8	22	80	0	51	0	42	137	54	451	1	418	37	0	82	0	127	0	37	0	65	40	33	7	24	2	31	0	5	2	23	0	19	21	86	2
OTU573377	219	4	0	3	0	32	0	234	0	2	0	1	0	17	197	6	1	3	0	0	544	48	265	0	27	6	0	0	0	0	0	0	0	229	57	1763	3	1	0	1	0	0	0	5	0	0	0	4	0
OTU4369127	55	63	6	25	18	234	79	90	982	41	204	19	197	154	63	49	109	45	17	28	59	57	87	30	114	29	19	268	50	22	10	49	9	79	40	53	22	29	13	8	6	4	11	17	14	0	3	37	9
OTU827548	7	88	0	110	1	0	0	146	0	36	0	29	0	0	5	120	0	114	0	109	34	11	36	0	86	95	0	21	0	104	0	150	0	13	4	28	1	148	0	219	1	54	0	69	0	68	0	26	0
OTU277647	70	91	0	26	3	516	3	127	460	17	40	2	72	55	99	165	30	11	0	0	74	5	54	9	52	3	4	151	0	21	0	3	0	39	1	76	1	12	2	1	0	5	54	95	33	2	57	17	3
OTU594371	13	29	0	4	0	30	3	47	5	5	6	11	3	18	31	23	36	34	6	18	6	9	12	9	16	14	7	7	3	29	1	38	2	2	30	5	8	28	2	47	7	16	48	117	0	18	106	40	15
OTU561898	12	558	0	173	0	0	0	61	0	89	0	197	0	0	2	190	0	160	0	126	1	0	23	0	32	165	0	5	1	39	0	364	0	0	0	4	0	161	0	381	1	51	0	22	0	224	0	0	0
OTUNew.ReferenceOTU29	32	127	0	74	0	0	0	396	0	62	0	63	0	1	33	157	0	169	0	149	53	16	123	0	87	180	0	16	0	90	0	106	0	18	2	62	1	73	0	205	0	9	0	15	0	31	0	9	0
OTU4461079	8	10	0	7	0	1	0	51	0	7	1	0	0	3	28	33	19	23	1	32	4	9	18	0	21	20	0	4	0	28	0	45	0	7	16	11	14	68	8	120	4	35	23	75	0	40	25	71	9
OTU581961	3	32	90	10	129	10	2	34	56	8	53	0	23	20	17	49	88	18	155	40	13	53	17	73	12	13	132	4	89	25	167	68	234	21	2	17	65	32	248	16	127	3	14	32	1	4	2	168	10
OTU209603	1	3	38	9	51	34	183	30	1	5	0	0	3	49	165	17	64	9	47	0	16	727	5	37	1	0	6	3	177	0	96	0	57	3	259	0	42	1	135	0	17	0	39	3	5	4	0	1	17
OTU584744	90	91	0	27	0	8	1	327	1	29	0	13	0	7	128	78	0	172	1	62	63	30	127	3	71	169	0	22	0	128	0	168	1	21	0	70	5	126	0	309	0	16	3	26	0	69	42	21	2
OTU232551	37	9	114	3	119	71	86	21	33	3	17	1	64	69	33	8	99	0	86	0	12	142	7	218	6	0	177	52	257	3	154	11	209	12	148	10	204	4	242	3	114	1	48	12	2	0	29	21	31
OTU767326	9	16	13	14	15	62	21	34	32	6	7	11	1	18	53	13	27	30	7	20	21	64	12	32	19	12	15	6	24	9	6	15	29	9	25	11	11	52	29	32	1	25	25	43	1	14	71	31	25
OTU1712353	12	198	0	440	1	4	0	46	0	116	0	364	2	1	22	127	0	181	0	371	24	5	21	0	28	191	0	8	0	38	0	163	0	7	1	11	1	95	0	211	0	26	0	59	0	74	6	12	0
OTUNew.ReferenceOTU34	115	39	0	28	0	92	0	377	5	58	0	25	0	6	66	24	15	23	0	28	112	13	316	5	137	53	0	91	0	96	0	46	0	35	17	161	7	50	0	92	0	7	1	84	0	73	7	70	1
OTU263962	14	20	485	0	661	8	6	7	2	0	0	0	1	211	12	2	205	6	183	1	5	136	8	33	0	10	295	1	50	0	150	2	250	0	17	0	50	5	47	2	138	0	18	0	0	0	0	0	1
OTU1104720	180	11	0	0	0	33	1	190	0	0	0	0	0	5	1	16	4	17	0	6	9	0	19	9	34	17	2	8	18	13	0	0	13	0	9	2	19	21	14	24	13	4	27	83	0	26	12	265	17
OTU330963	15	29	474	5	591	36	47	4	6	3	5	0	0	41	0	6	132	0	100	0	26	123	13	44	8	1	125	5	89	5	132	26	134	15	80	3	87	8	38	3	46	0	20	4	0	0	7	19	8
OTU4461947	41	78	0	149	0	14	1	154	1	31	0	109	0	2	69	66	4	97	0	95	57	37	50	6	37	79	0	18	3	44	0	80	0	31	16	189	8	96	0	135	0	53	7	196	0	50	10	73	11
OTU4425842	25	62	1	318	0	20	0	120	4	69	3	224	2	2	9	27	3	56	0	216	22	1	99	0	101	63	1	37	0	70	0	252	0	9	1	11	0	100	0	201	1	49	2	104	2	78	0	6	1
OTUNew.ReferenceOTU57	240	41	0	0	0	0	0	1182	0	9	0	0	0	0	27	0	0	0	0	0	443	16	13	0	1	0	0	0	0	0	0	0	0	68	14	1253	0	1	0	0	0	0	0	0	0	0	0	0	0
OTU3568809	0	851	1	871	0	0	0	0	1	324	0	714	0	0	0	4	0	75	0	367	0	0	0	0	2	47	0	0	0	0	0	0	0	0	0	1	0	0	0	25	0	0	0	0	0	0	0	0	0
OTUNew.CleanUp.ReferenceOTU95	5	5	9	1	8	17	2	20	178	1	50	1	95	13	5	1	2	1	10	1	2	8	2	3	0	5	18	3	2	0	3	2	14	4	6	5	22	13	3	13	4	32	73	123	1	17	84	7	25
OTU724326	9	17	2	5	0	154	58	46	19	1	3	0	23	40	47	73	173	4	1	2	48	137	13	14	15	3	0	11	22	7	1	7	0	47	166	2	0	35	4	45	0	32	21	61	5	188	9	32	39
OTUNew.ReferenceOTU69	5	29	0	27	0	216	6	437	561	91	216	51	161	37	50	129	31	17	3	0	8	12	76	7	39	5	0	259	0	6	0	22	0	10	7	8	0	7	0	1	0	3	23	94	47	0	9	22	1
OTU877509	8	39	0	9	0	0	0	97	3	28	0	40	0	0	25	46	8	107	0	81	22	0	389	0	125	68	0	78	0	73	0	79	0	19	0	13	1	75	0	212	0	4	0	5	0	63	0	5	0
OTUNew.ReferenceOTU42	53	0	135	1	128	32	4	121	1	1	0	5	0	39	243	0	3	17	100	3	90	78	4	52	0	0	226	6	279	0	130	0	182	87	23	210	389	2	160	0	92	0	9	6	0	0	3	94	9
OTUNew.CleanUp.ReferenceOTU0	24	3	4	0	4	366	51	32	218	7	51	0	99	25	92	25	55	3	2	0	54	45	49	51	29	8	2	10	6	14	2	0	10	38	39	59	24	27	8	3	2	6	5	158	2	2	35	26	1
OTU758258	0	3	66	10	72	16	453	3	53	0	7	0	23	48	3	15	29	3	2	0	2	135	0	118	1	0	3	5	760	0	65	0	23	8	643	0	48	1	22	3	17	1	118	0	1	0	0	2	124
OTU582344	35	88	5	118	8	47	0	58	36	56	11	270	42	7	30	44	2	77	3	79	24	0	53	5	18	66	18	17	10	12	12	66	2	17	0	52	8	63	17	215	42	20	3	29	3	34	23	10	0
OTU539064	2	0	0	0	6	29	9	8	150	0	235	0	138	19	5	8	26	0	34	0	5	10	24	43	5	0	14	26	4	0	7	0	19	0	1	2	33	2	12	0	14	5	31	12	1	0	210	60	19
OTU773487	5	11	89	15	74	15	74	2	1	21	0	9	1	3	5	13	37	30	59	22	2	79	15	156	7	7	201	19	127	4	166	16	294	7	123	2	168	4	237	20	223	0	44	1	3	3	12	5	41
OTU554346	43	201	0	58	0	408	0	189	31	203	2	59	0	14	38	59	0	138	0	157	128	27	92	0	128	94	0	45	0	41	0	83	0	122	9	17	2	46	3	65	0	7	2	51	1	61	4	11	1
OTU4333388	3	123	1	96	0	1	0	16	7	275	3	121	3	4	33	382	0	213	0	82	14	3	223	2	265	130	0	28	0	132	0	280	0	9	3	6	2	85	0	106	0	3	0	8	0	20	2	10	0
OTU3283110	46	29	0	44	0	4	0	94	2	40	0	132	7	4	41	138	3	77	1	72	64	35	491	3	377	94	2	47	0	117	0	182	0	57	2	129	18	144	2	39	0	14	6	52	1	9	16	40	1
OTU63818	2	0	7	3	3	445	238	22	667	10	336	17	193	662	68	27	232	5	0	0	20	110	3	6	0	4	0	1	0	1	0	0	0	9	2	1	0	0	0	0	0	0	0	0	0	0	0	0	0
OTU646052	1	0	14	0	29	54	154	2	63	0	97	0	108	38	0	0	38	2	38	1	2	7	0	90	0	0	26	57	122	0	46	0	26	0	31	1	436	0	208	1	66	1	181	1	2	0	1	0	104
OTU332017	2	2	0	5	0	11	46	0	0	0	0	0	0	0	0	0	0	1	0	0	0	12	0	0	0	0	0	0	0	0	0	0	0	1	0	0	6	0	0	0	1	2	0	0	0	0	0	0	0
OTU4073697	29	537	0	365	0	0	0	53	0	157	0	420	0	0	13	145	0	158	0	256	16	4	45	1	37	192	0	4	0	62	0	137	1	12	2	17	1	84	0	119	0	28	0	38	0	21	0	2	0
OTU804029	0	0	65	0	62	80	388	2	15	0	1	0	9	0	0	0	30	0	10	0	0	248	0	52	0	0	152	43	109	0	177	6	192	2	92	0	266	0	535	2	252	0	99	0	4	0	0	0	52
OTU4443138	16	74	0	94	0	23	5	40	16	2	3	53	4	1	52	25	0	52	0	68	37	9	475	3	69	47	0	109	9	49	0	160	4	40	2	81	1	162	10	423	1	22	25	65	8	52	8	1	0
OTU552866	27	19	1	3	7	218	2	38	811	4	404	0	784	73	65	41	37	10	1	8	10	16	40	28	59	9	0	40	0	9	0	25	0	13	10	25	9	16	0	2	3	1	13	22	4	0	9	44	2
OTU535589	2	77	0	16	0	8	1	8	14	53	85	2	100	33	71	741	30	55	5	31	94	30	350	31	80	22	4	121	8	20	3	369	2	47	11	5	8	35	2	16	1	3	41	4	26	5	6	42	15
OTU512172	38	59	594	23	623	55	146	28	30	18	2	39	9	200	4	13	453	3	0	0	6	67	11	0	5	3	5	0	2	0	0	0	4	0	0	1	0	0	0	0	0	0	0	0	0	0	0	0	0
OTU632126	2	0	56	0	65	30	60	6	42	0	15	0	38	70	7	2	109	5	66	0	12	273	1	255	1	0	131	39	167	0	94	2	216	8	193	2	183	1	327	0	23	1	135	2	6	0	39	3	140
OTUNew.ReferenceOTU374	14	55	0	69	4	347	29	244	203	41	30	0	72	79	69	51	7	107	5	29	60	0	66	6	124	18	0	37	19	62	0	100	0	43	15	57	0	112	0	92	2	4	3	39	1	45	5	21	1
OTU613575	71	107	1	46	22	230	25	558	291	30	112	28	67	30	74	114	56	29	6	10	82	20	92	60	119	27	1	115	11	14	0	28	0	71	4	90	3	32	0	2	0	3	16	28	9	0	3	13	1
OTUNew.ReferenceOTU64	7	58	0	47	0	6	0	305	42	62	13	49	10	27	124	221	20	225	2	108	38	4	304	3	357	228	0	55	2	123	2	220	1	9	0	17	0	61	0	10	0	3	0	23	1	2	0	14	2
OTUNew.ReferenceOTU228	70	0	4	0	99	18	14	6	66	0	14	0	39	30	6	1	73	0	0	0	9	24	13	7	1	0	1	547	4	11	0	0	0	7	3	6	16	22	9	0	0	25	38	200	21	6	2	23	3
OTU839363	3	204	0	403	0	0	0	49	0	200	0	392	0	0	0	257	0	378	0	603	0	0	12	0	28	249	0	0	0	2	0	62	1	2	0	0	0	12	0	16	0	0	0	1	0	0	0	0	0
OTU1127079	0	121	1	878	1	1	0	2	2	153	1	700	2	0	0	12	1	137	1	635	0	2	2	0	5	134	1	0	0	1	1	23	1	0	0	0	0	0	1	35	0	0	0	0	0	0	0	0	0
OTUNew.ReferenceOTU594	20	86	0	26	0	0	0	130	0	56	0	36	0	0	24	18	0	58	1	104	209	21	11	0	3	19	0	0	0	2	0	4	0	128	29	1861	0	0	0	0	0	0	0	1	0	0	0	0	0
OTU337214	26	12	331	22	436	31	99	15	18	0	5	0	4	33	72	5	74	3	83	0	6	67	7	110	11	1	474	5	39	0	37	9	86	10	27	2	34	5	113	1	74	0	34	0	5	0	0	6	25
OTU254226	2	56	0	23	0	16	0	59	5	22	0	6	0	2	10	96	1	196	0	103	25	6	35	0	50	125	0	9	1	85	0	75	0	10	12	4	0	56	1	210	0	14	0	20	0	73	2	7	1
OTU833743	0	1	0	14	0	13	3	1	1	0	3	0	0	10	0	1	0	18	0	0	0	4	5	0	0	8	0	0	0	7	0	1	0	0	0	0	0	24	0	19	0	8	0	26	0	14	25	1	1
OTU826498	0	0	0	2	0	0	0	2	0	0	0	0	0	1	0	4	0	61	0	68	4	0	2	0	11	151	0	1	0	31	0	62	0	0	0	0	0	43	0	291	0	26	0	11	0	358	0	9	0
OTUNew.CleanUp.ReferenceOTU2	12	16	3	16	6	60	6	42	64	15	51	40	35	50	27	84	26	33	9	11	38	16	75	30	92	17	25	19	5	18	14	16	9	12	4	28	6	18	0	0	2	7	15	68	2	2	31	84	11
OTU513658	2	12	3	8	0	0	1	62	0	9	0	2	0	0	5	75	0	53	0	27	50	1	275	0	327	47	0	28	0	90	0	67	0	8	6	44	0	29	0	123	0	2	0	17	0	17	0	66	1
OTUNew.ReferenceOTU237	511	34	10	8	15	699	142	335	3	2	0	0	1	29	280	20	1	1	4	1	61	63	42	6	44	1	1	24	3	8	6	0	1	69	29	163	12	7	40	0	5	0	1	3	0	0	0	9	2
OTU313341	1	149	0	56	0	0	0	56	2	94	12	71	2	34	2	264	29	231	0	157	23	1	224	4	159	191	2	38	1	135	0	110	0	2	2	9	0	84	0	131	0	16	0	45	0	25	0	3	1
OTU4334702	10	3	0	20	1	23	0	24	119	0	12	0	30	2	14	67	2	31	1	14	7	5	31	1	45	30	0	7	3	19	0	5	1	2	3	2	0	11	0	31	0	46	6	67	0	32	8	2	3
OTUNew.CleanUp.ReferenceOTU1	123	122	0	89	3	193	8	327	111	87	50	33	42	20	37	69	17	38	5	24	123	64	96	34	186	15	3	47	17	44	3	60	4	62	18	56	16	62	5	14	6	0	4	4	0	4	26	5	1
OTUNew.ReferenceOTU27	0	4	0	1	2	2	9	0	14	1	9	0	8	4	7	0	4	5	15	0	0	4	0	36	6	0	3	13	2	3	0	0	0	0	0	0	6	31	2	0	0	13	5	97	1	9	30	10	1
OTU251424	34	98	0	25	0	17	0	203	1	27	5	55	23	10	81	102	19	74	17	61	155	101	104	31	59	36	13	20	0	44	0	89	1	70	38	324	30	77	0	39	0	11	2	46	0	10	2	145	6
OTUNew.ReferenceOTU53	327	55	0	0	0	64	0	258	8	1	0	0	0	80	725	0	4	0	0	0	21	51	5	55	9	0	0	148	22	3	0	0	0	45	228	55	318	11	15	0	0	1	4	40	3	0	0	143	6
OTU1109402	0	1	1	0	0	10	7	0	7	0	12	0	12	0	0	0	0	0	1	0	0	0	0	26	0	0	7	2	15	1	3	0	21	0	0	0	10	0	2	1	17	7	138	1	1	0	179	3	5
OTU250427	0	350	0	245	0	0	0	31	0	164	1	339	0	0	0	206	1	499	0	516	0	0	22	0	33	283	0	0	0	13	0	3	0	0	0	0	0	0	0	6	1	0	0	0	0	0	0	0	0
OTU341618	6	27	1	53	0	1	1	46	3	9	1	16	6	0	25	2	4	37	1	73	5	4	5	3	3	42	1	8	1	14	0	28	0	1	8	1	4	28	1	56	0	9	5	15	0	38	5	1	4
OTU161513	4	7	118	4	102	3	6	5	1	4	5	3	0	2	6	15	2	20	76	4	16	11	7	58	5	15	443	14	44	5	189	8	98	8	5	10	100	4	283	0	921	0	19	0	0	0	0	4	0
OTU364960	2	4	0	0	0	1	0	4	0	8	1	0	0	0	67	6	0	0	0	0	1356	21	7	16	28	1	0	14	1	1	0	0	1	508	35	537	23	9	4	0	0	0	0	3	0	0	3	4	1
OTUNew.ReferenceOTU70	35	70	0	25	0	6	0	261	0	25	0	0	0	13	179	83	0	169	0	18	153	91	152	0	313	12	0	70	0	49	0	6	0	146	85	428	1	35	0	21	0	3	0	19	0	8	0	3	0
OTUNew.ReferenceOTU32	1	0	14	0	7	17	163	0	0	0	0	0	0	0	0	0	13	0	17	1	11	44	0	25	6	0	31	115	51	0	136	0	77	0	9	3	247	0	323	2	55	0	1128	2	42	0	0	5	35
OTUNew.ReferenceOTU540	1	6	0	1	0	0	0	1	0	4	1	0	0	1	0	20	0	12	0	6	1	2	43	2	19	11	0	10	0	26	0	8	0	2	1	1	1	21	0	12	0	42	1	37	0	14	6	8	0
OTU337487	0	2	0	2	0	147	410	265	88	61	1	8	1	179	128	58	32	36	0	2	10	172	13	33	8	18	0	8	242	3	23	0	37	2	252	5	35	4	5	4	0	1	53	0	4	14	4	3	26
OTU135755	9	69	0	94	0	0	0	242	1	34	0	41	0	0	14	193	0	159	0	149	11	5	49	0	58	228	0	47	0	60	0	195	0	5	0	9	0	58	0	172	0	13	0	8	0	71	0	0	0
OTUNew.ReferenceOTU547	18	6	0	0	2	115	16	34	236	3	73	0	90	18	15	10	31	12	3	6	7	6	25	13	17	25	4	5	0	6	0	7	1	6	10	13	4	8	4	28	2	2	19	9	1	12	68	4	4
OTUNew.ReferenceOTU496	2	1	0	3	5	977	235	245	608	15	25	0	6	231	78	23	2	8	0	2	5	17	3	2	2	9	0	8	0	1	0	1	0	4	6	1	0	11	0	2	0	0	0	0	2	0	0	5	4
OTU341186	7	0	10	1	15	78	73	10	145	1	91	6	65	322	30	3	349	8	10	0	12	158	2	45	2	3	2	0	39	4	2	1	9	13	97	4	2	9	0	20	2	13	14	62	0	3	16	0	14
OTUNew.ReferenceOTU554	37	54	7	19	5	155	49	71	679	26	127	15	106	93	35	56	106	26	7	13	38	30	41	31	63	18	13	213	28	19	2	40	11	58	32	32	6	17	6	6	5	2	23	9	22	0	0	25	4
OTUNew.ReferenceOTU41	9	2	84	0	121	12	36	10	19	0	30	0	36	41	0	0	110	2	145	6	1	33	2	98	0	0	32	15	78	0	54	4	27	0	0	1	311	0	124	3	126	5	14	11	1	0	41	149	38
OTUNew.CleanUp.ReferenceOTU60	8	79	0	13	0	3	1	56	3	12	3	5	1	5	14	103	13	109	5	44	45	8	229	3	98	70	1	36	2	52	0	52	0	16	7	38	2	83	1	53	0	5	2	17	2	11	0	53	5
OTUNew.ReferenceOTU461	142	19	0	4	0	23	3	80	1	29	2	1	1	7	19	0	1	8	0	0	65	5	18	2	18	0	0	9	1	7	0	0	1	8	1	190	9	18	0	0	2	21	19	223	1	1	36	47	3
OTU4328527	18	3	171	6	226	42	81	18	10	4	7	6	1	22	11	3	4	11	88	0	8	49	3	22	5	5	249	16	35	4	76	0	112	1	20	3	190	6	382	0	505	0	10	0	1	0	0	5	0
OTU966092	0	1	0	0	0	17	7	2	1	1	0	0	4	35	0	10	53	0	0	0	15	233	10	33	12	1	0	34	266	3	3	12	0	13	465	0	0	0	0	1	0	0	40	6	4	0	0	0	5
OTU834774	55	41	0	184	0	16	0	180	1	24	0	39	0	11	128	8	1	69	0	46	57	16	55	0	90	53	0	22	0	59	0	101	0	11	16	98	2	53	1	135	0	6	0	6	0	29	0	12	0
OTU2352826	30	8	86	3	184	44	29	33	83	2	23	1	81	31	8	3	33	7	21	1	35	100	15	36	4	4	67	2	60	0	24	0	96	5	58	90	231	9	67	4	58	2	54	30	1	2	53	5	19
OTUNew.ReferenceOTU35	3	80	0	29	0	0	0	43	2	54	0	232	0	0	27	79	0	133	0	158	6	1	114	0	79	218	0	6	0	47	0	322	0	0	1	6	0	109	0	294	1	8	0	2	0	97	0	0	0
OTU347784	12	25	0	16	0	10	2	77	84	32	11	7	20	12	3	27	0	36	0	47	13	10	48	6	38	24	0	42	5	25	2	13	0	5	0	9	2	27	0	24	0	2	6	3	1	5	7	4	1
OTUNew.ReferenceOTU211	0	3	49	0	56	34	169	3	6	1	1	0	0	13	0	0	49	6	112	4	4	134	3	33	2	3	179	0	118	0	210	0	230	1	9	3	81	1	298	1	587	0	22	0	2	1	0	0	7
OTU246959	0	1	0	0	2	4	0	2	2	0	1	0	2	13	0	0	3	0	0	0	0	2	1	22	3	0	1	3	0	0	0	0	3	1	1	0	0	31	1	2	1	13	16	46	2	6	190	8	2
OTU232511	1	87	0	625	0	0	0	42	2	97	1	488	2	4	0	10	1	89	0	433	0	1	1	0	3	136	0	1	0	3	1	3	0	1	0	1	0	17	0	61	0	1	0	5	0	10	0	0	0
OTUNew.ReferenceOTU527	4	0	0	0	0	327	97	78	828	6	155	0	291	293	74	48	37	12	0	4	71	30	7	0	9	9	0	12	0	0	0	0	1	16	18	2	1	0	0	0	0	0	0	0	1	0	4	0	0
OTU237565	0	1	223	2	309	14	112	12	28	0	13	0	1	134	13	2	96	0	36	0	5	102	1	91	0	0	181	10	96	1	131	0	114	5	169	1	40	2	37	0	71	0	10	0	0	0	0	0	9
OTU1123903	16	48	0	31	1	18	4	67	7	12	2	12	2	8	5	38	8	197	1	155	44	10	87	0	57	92	0	68	0	36	0	82	0	35	5	10	3	57	0	129	0	6	0	16	0	19	0	1	2
OTUNew.ReferenceOTU170	9	1	196	0	245	56	229	8	5	3	1	0	0	29	14	0	94	3	66	0	5	118	2	41	6	1	372	14	56	2	79	9	189	8	124	2	37	7	106	1	146	0	21	0	0	0	0	2	3
OTU971994	23	41	7	8	18	31	10	29	17	15	2	0	5	28	37	48	13	13	0	1	20	35	44	22	83	33	1	39	3	7	0	5	0	10	43	29	68	21	4	5	1	13	39	22	0	8	38	63	22
OTU335432	0	83	0	143	0	0	0	11	0	26	1	47	0	0	0	39	0	47	0	94	3	0	12	0	25	83	0	4	0	41	1	181	0	0	0	4	0	60	0	373	0	17	0	7	0	174	0	1	0
OTU4441005	0	152	1	605	0	0	0	4	0	180	0	974	0	0	0	5	0	56	0	314	0	0	3	0	0	62	0	0	0	0	0	3	0	0	0	0	0	0	0	6	0	0	0	0	0	0	0	0	0
OTUNew.ReferenceOTU480	0	12	0	2	1	29	59	25	46	15	54	9	140	249	41	30	179	23	7	46	7	108	28	0	24	6	3	4	2	0	1	0	0	24	21	1	0	0	0	1	0	1	0	0	0	0	0	1	1
OTUNew.ReferenceOTU66	1	20	0	5	0	0	0	25	0	1	0	3	0	0	38	151	0	148	0	67	82	6	193	0	208	99	0	41	0	271	0	214	0	8	17	102	0	119	0	56	0	16	0	4	0	34	0	0	0
OTUNew.ReferenceOTU486	13	4	0	2	0	0	0	33	0	0	0	0	0	0	100	0	1	0	0	0	770	38	2	2	7	0	0	5	0	0	0	0	0	691	133	488	16	14	0	1	0	0	0	0	0	0	0	5	0
OTU260988	2	0	62	0	111	36	93	4	31	1	12	0	12	72	28	1	113	0	26	4	7	161	5	120	1	0	131	5	165	0	77	3	197	8	102	1	109	0	200	2	132	0	64	2	0	0	0	0	38
OTU512249	310	929	0	555	0	35	0	19	0	69	0	16	0	0	1	0	0	3	0	0	1	0	347	0	16	12	0	0	0	0	0	0	0	3	0	0	0	0	0	0	0	0	0	0	0	0	0	0	0
OTU316226	0	89	1	45	0	0	0	19	7	41	0	34	0	0	0	67	0	114	0	68	5	2	66	0	87	91	0	22	0	39	0	148	0	3	1	3	1	81	0	155	0	35	0	24	0	77	0	0	0
OTU1543161	43	4	126	0	158	66	168	24	3	15	6	26	0	36	52	10	183	13	38	0	17	156	6	57	14	1	159	13	89	1	61	0	88	5	28	6	146	0	136	0	80	0	109	1	2	0	1	10	5
OTU231309	35	59	66	23	78	75	41	22	45	27	10	82	24	59	29	47	60	34	40	13	55	59	75	71	63	56	34	48	83	13	56	15	91	19	54	32	84	19	84	14	34	1	17	18	1	7	29	18	0
OTU126392	9	2	81	0	104	6	36	7	13	1	29	0	60	50	14	4	91	2	60	7	9	223	4	144	3	3	88	25	109	0	50	12	93	24	154	31	130	0	128	5	21	0	90	0	2	1	31	4	77
OTU4294892	2	19	0	17	2	0	0	2	8	14	6	22	17	0	2	24	1	65	0	48	8	0	46	9	284	163	5	118	0	229	0	586	0	3	0	10	0	51	0	80	0	6	2	0	0	25	13	4	0
OTUNew.ReferenceOTU240	1	0	9	2	16	68	102	19	3	7	8	2	0	38	0	1	8	0	14	2	0	5	4	10	2	4	38	0	0	0	10	0	1	0	4	2	6	2	7	0	28	0	5	0	0	2	180	1	1
OTUNew.ReferenceOTU78	18	49	0	1	0	20	5	0	3	3	0	0	0	16	15	87	9	10	5	10	9	78	97	0	11	13	0	3	0	26	0	0	0	56	56	0	0	32	0	38	0	9	1	0	0	41	0	1	5
OTU563300	4	174	1	499	1	3	0	1	0	110	0	338	0	0	0	42	1	210	0	454	1	0	10	0	3	185	0	0	0	5	0	95	0	0	0	0	0	1	0	66	0	0	0	0	0	7	0	0	0
OTU4381916	0	0	2	0	5	7	26	1	0	0	0	0	0	0	0	0	2	0	0	0	0	19	0	4	0	0	0	4	41	0	122	13	75	0	0	0	30	0	34	0	48	2	15	0	2	0	0	0	10
OTU4298181	19	21	1	8	6	39	78	34	44	3	17	0	50	100	6	3	104	3	20	3	38	160	2	34	10	1	6	33	175	6	12	2	8	56	104	6	32	2	30	4	0	3	265	12	9	0	1	2	139
OTU1111145	0	1	0	0	0	0	0	1	0	0	0	0	0	0	0	0	0	0	0	0	0	0	0	0	3	0	1	0	0	0	1	0	0	0	0	0	2	0	0	0	1	1	6	9	0	1	46	0	0
OTUNew.ReferenceOTU429	0	0	0	0	4	88	22	1	249	1	128	0	189	17	1	0	5	2	13	0	2	0	0	54	1	0	23	6	6	0	8	0	9	0	0	0	2	2	0	0	0	0	37	0	0	0	49	18	11
OTUNew.ReferenceOTU366	0	2	0	0	0	0	0	0	0	0	0	0	0	22	0	0	21	0	0	0	0	7	1	0	1	0	0	3	0	3	4	2	0	3	0	1	2	162	2	6	1	52	58	52	0	40	26	5	11
OTU164181	0	0	8	0	22	9	53	1	20	0	26	0	16	5	1	1	10	0	2	0	24	25	15	38	5	0	3	4	23	3	22	0	48	11	2	14	19	1	3	0	28	3	268	23	3	0	547	33	21
OTU793587	56	89	42	23	68	98	74	46	11	48	15	73	11	23	10	15	11	2	40	5	29	112	84	162	24	4	68	18	100	26	67	19	99	20	142	41	43	25	82	1	136	0	18	0	0	0	0	9	1
OTUNew.ReferenceOTU370	7	1	71	0	102	11	23	0	16	0	16	0	23	34	3	0	34	2	22	0	3	40	11	78	3	0	39	36	197	1	100	12	240	4	125	4	95	8	39	1	70	0	325	5	14	0	2	6	120
OTU305536	45	48	0	0	0	7	0	340	1	0	0	0	0	6	42	75	0	149	0	16	50	4	114	0	104	38	0	15	1	151	0	5	0	18	0	36	3	46	0	6	0	27	0	86	0	8	0	62	2
OTU288195	6	147	0	268	1	19	6	41	13	296	0	617	0	1	5	79	0	114	2	138	7	2	15	0	34	171	0	15	1	10	0	0	1	15	3	40	4	2	1	18	0	0	1	4	1	9	0	4	0
OTUNew.ReferenceOTU421	81	122	0	0	0	0	1	407	0	0	0	0	0	20	369	0	0	0	0	0	268	51	0	0	0	0	0	0	0	0	0	0	0	335	94	398	6	0	0	0	0	0	0	0	0	0	0	0	0
OTU153017	14	27	0	13	1	321	2	202	236	13	83	17	3	46	76	27	35	34	0	46	29	5	56	0	111	33	0	31	0	79	0	152	0	6	0	22	0	32	1	52	0	7	3	21	1	48	13	3	1
OTUNew.ReferenceOTU418	6	8	56	0	105	21	87	17	32	2	85	0	27	10	4	3	22	0	100	0	2	6	0	80	0	0	172	3	60	5	104	0	63	0	1	9	85	0	304	0	569	0	32	0	0	0	0	40	0
OTU236958	3	6	0	0	1	11	0	8	18	0	2	1	9	5	8	11	2	1	4	0	10	4	17	19	2	0	6	5	1	18	11	2	3	1	0	2	16	13	0	6	3	18	18	72	0	4	40	39	7
OTU649229	3	14	17	0	17	33	8	25	5	6	13	0	0	10	100	0	28	7	30	0	200	19	0	87	8	4	67	2	55	3	31	0	27	40	9	758	169	4	154	0	59	0	19	2	0	0	2	10	5
OTUNew.ReferenceOTU464	22	181	0	50	0	4	0	12	1	61	0	154	0	0	24	204	0	61	0	95	69	2	98	0	43	40	0	31	0	83	0	118	0	18	1	178	0	76	0	156	0	7	0	8	0	104	0	0	0
OTU314077	1	0	15	0	13	0	32	0	0	0	0	0	0	2	0	0	5	0	0	0	0	10	0	0	0	0	0	12	21	0	18	0	2	0	0	0	58	0	31	0	0	1	14	0	1	0	0	1	12
OTU539147	4	45	0	83	0	33	0	34	5	8	0	74	0	4	4	33	0	134	0	154	9	3	22	4	24	146	1	7	0	57	0	130	0	4	0	1	0	75	0	331	2	2	1	43	0	22	6	0	0
OTU580942	8	95	0	68	0	0	0	14	0	71	0	81	1	0	10	92	0	81	0	114	58	8	133	0	154	134	0	47	0	84	0	63	0	3	2	47	2	51	0	76	0	21	0	25	0	33	0	12	0
OTU315438	1	0	59	0	52	3	23	0	5	0	0	0	0	0	0	0	17	1	5	1	3	7	0	54	0	0	26	13	230	1	433	0	407	0	2	4	69	0	47	1	220	0	66	0	2	0	0	0	31
OTUNew.CleanUp.ReferenceOTU3	7	0	226	5	512	3	62	8	0	3	2	6	2	11	14	7	36	0	50	0	2	54	3	15	1	0	226	3	12	0	84	0	29	0	16	0	133	4	167	0	74	0	48	0	0	0	0	2	3
OTU512959	0	0	0	0	2	0	10	2	0	0	0	0	0	0	0	0	2	0	0	0	0	7	0	46	0	0	2	34	440	0	393	13	467	0	11	0	74	2	60	3	92	0	150	0	8	0	0	1	107
OTU190032	5	13	1	37	4	55	2	39	51	54	5	97	0	11	7	81	7	34	5	23	35	4	62	9	71	101	6	44	3	27	0	11	0	5	2	34	6	19	0	35	0	17	10	36	1	94	30	18	1
OTU350486	0	12	0	2	0	0	0	12	17	6	3	7	54	0	13	11	0	8	3	15	705	6	80	1	219	25	0	34	0	34	1	48	0	162	9	443	8	27	0	5	0	1	0	0	0	0	0	0	0
OTUNew.ReferenceOTU79	3	8	398	6	381	36	91	3	5	1	0	0	0	13	0	0	17	8	37	0	3	76	0	3	7	0	582	0	61	0	71	9	87	0	0	0	0	0	1	0	5	0	0	0	0	0	0	0	0
OTU1789522	79	37	0	2	0	40	3	220	9	3	0	11	1	7	82	105	4	55	1	3	35	24	122	13	138	25	2	78	0	43	0	25	0	24	8	15	9	51	0	16	0	15	2	38	0	7	14	24	4
OTU4423718	2	1	325	1	313	5	86	4	0	0	0	0	0	3	0	0	39	73	177	7	2	35	1	83	4	5	464	8	21	0	26	0	71	0	7	11	34	0	54	0	59	0	25	0	0	0	0	1	0
OTU4360117	99	185	0	51	0	16	0	502	0	17	0	9	0	31	521	29	3	3	0	0	42	51	9	5	0	0	0	10	0	0	0	0	0	185	77	91	19	3	0	1	0	0	0	5	2	0	0	17	1
OTUNew.ReferenceOTU549	10	1	112	1	135	18	102	8	20	8	7	0	11	129	7	1	66	4	34	0	11	128	7	99	1	1	79	23	125	0	76	3	117	5	171	1	84	0	88	0	48	0	4	4	2	0	3	0	4
OTU435644	6	22	0	11	0	11	0	70	12	17	1	25	0	1	27	56	3	42	5	12	89	5	98	0	346	106	1	58	0	94	0	146	0	42	9	416	4	33	0	16	0	5	0	14	0	10	0	8	0
OTU4341216	112	33	0	4	0	0	0	388	2	2	0	0	0	4	67	71	0	28	0	5	63	16	118	0	84	8	0	18	0	38	0	1	0	34	1	3	0	39	0	41	0	43	0	92	0	26	0	0	0
OTU56545	32	12	95	14	127	270	378	81	153	31	16	1	5	93	67	23	298	0	4	0	4	111	2	0	0	0	9	5	5	1	0	6	6	2	3	5	4	2	0	0	7	0	1	0	0	0	0	0	0
OTU137211	2	23	0	2	0	30	0	60	2	7	0	1	0	10	5	24	0	59	0	65	6	4	23	0	4	13	0	4	0	9	0	37	0	11	2	3	2	17	0	65	0	36	6	199	1	23	10	9	0
OTU230171	23	10	0	53	0	2	1	161	0	6	0	43	5	5	1	23	0	25	0	6	21	4	57	0	43	3	2	13	0	5	3	4	0	3	2	2	3	17	0	7	0	13	17	33	0	6	14	5	4
OTU4396047	0	12	223	4	282	44	89	12	14	16	17	0	3	48	5	0	118	2	67	1	0	21	0	79	0	0	150	0	86	0	74	0	83	0	31	3	51	5	61	0	82	1	63	0	1	0	0	7	12
OTU108910	0	968	1	745	0	0	0	0	0	62	0	25	0	0	0	0	0	2	1	0	0	0	39	0	43	42	0	0	0	1	0	0	0	0	0	0	0	0	0	0	0	0	0	0	0	0	0	0	0
OTUNew.ReferenceOTU268	3	2	9	0	2	284	36	25	590	9	314	19	280	67	47	38	64	2	4	4	2	12	5	4	2	1	1	12	1	1	0	0	0	16	0	0	1	0	0	0	0	0	0	2	3	0	1	6	0
OTU151638	0	0	0	7	0	0	0	0	0	0	0	5	0	0	0	261	1	189	0	100	40	0	192	0	467	186	0	18	0	187	0	46	0	0	0	0	0	41	3	45	0	1	1	1	0	2	0	3	0
OTU1143727	72	19	0	12	0	10	0	777	0	2	2	17	0	7	19	20	1	20	0	7	46	29	53	0	62	22	0	45	0	150	0	9	0	32	22	12	0	57	0	23	0	7	0	27	0	3	0	24	1
OTU185100	3	4	134	0	176	0	0	0	0	0	0	0	0	15	0	0	16	0	5	0	0	2	0	0	0	0	288	0	39	1	278	3	544	0	0	0	9	0	37	9	256	0	0	0	0	0	1	0	0
OTU592350	0	62	0	166	0	0	0	43	1	29	0	92	0	0	1	61	0	59	0	189	11	0	12	0	19	83	0	5	1	28	0	99	0	1	1	2	0	46	0	193	0	19	0	19	0	70	0	9	1
OTUNew.ReferenceOTU575	2	0	8	0	8	34	163	3	5	0	3	0	0	112	7	0	184	0	19	0	6	232	0	99	1	0	6	26	238	0	33	7	27	14	318	4	74	3	55	0	3	0	7	2	1	0	0	3	24
OTUNew.CleanUp.ReferenceOTU12	143	276	0	88	0	2	0	349	0	18	0	83	0	1	75	227	0	98	0	112	23	7	142	0	77	54	0	5	0	14	0	5	0	33	8	16	0	4	0	14	0	2	0	4	0	2	0	0	0
OTUNew.ReferenceOTU352	13	80	0	46	0	0	0	178	0	39	0	11	1	0	12	103	0	216	0	79	8	1	63	0	38	97	0	9	0	58	0	133	0	5	3	13	0	54	0	182	0	23	0	23	0	36	0	8	0
OTU578339	27	4	0	2	7	462	41	64	127	13	22	3	31	17	11	15	10	0	12	0	0	0	13	5	0	0	1	448	2	0	0	0	0	1	0	15	4	1	1	0	1	2	122	41	79	0	10	9	1
OTU151544	13	108	0	75	0	32	0	32	6	62	0	117	0	5	1	23	12	62	0	144	17	4	46	3	41	213	1	7	0	21	0	155	0	13	10	11	1	20	0	193	0	7	0	12	0	76	39	2	0
OTU137837	0	0	8	0	9	1	8	0	1	0	4	0	0	3	0	0	0	0	0	0	0	4	0	6	0	0	0	0	0	0	0	0	4	0	5	0	1	0	6	0	7	3	7	0	0	0	97	1	5
OTU824846	11	480	0	222	0	0	0	26	0	126	0	234	0	0	20	115	1	78	1	166	22	1	23	0	9	119	0	4	0	14	0	105	0	8	0	6	0	7	0	46	0	3	0	1	0	7	0	2	0
OTU593922	12	151	0	87	0	0	0	54	0	60	0	19	0	0	0	86	0	78	0	87	5	0	41	0	17	90	0	1	0	48	0	184	0	5	4	5	0	108	0	185	0	44	0	68	0	121	0	7	0
OTU3947431	135	210	0	87	0	95	16	108	3	202	1	168	0	19	113	81	0	6	3	9	134	21	54	9	11	5	0	39	3	0	0	13	0	39	53	140	10	12	5	0	1	0	2	8	2	0	0	14	0
OTU4357016	4	1	30	0	94	66	57	5	37	0	11	0	26	58	2	0	83	0	27	0	4	148	8	128	0	0	65	11	54	0	66	0	91	1	134	0	91	3	98	1	28	0	52	0	1	0	15	4	22
OTU560276	17	2	0	7	0	22	0	24	2	0	0	4	0	4	1	6	15	9	0	2	15	0	17	0	68	23	0	5	1	6	1	9	9	5	1	4	5	0	1	19	0	4	6	17	0	13	156	3	0
OTUNew.ReferenceOTU488	15	51	0	98	0	0	0	44	0	29	1	51	0	0	0	169	0	318	0	97	12	1	17	0	19	151	0	0	0	47	0	65	0	10	0	66	1	74	0	145	0	15	0	45	0	36	0	11	0
OTUNew.ReferenceOTU45	12	52	5	21	0	12	24	13	14	73	0	31	0	0	0	108	1	271	0	132	50	0	45	2	17	449	0	19	0	93	1	0	0	3	0	32	0	99	0	2	0	15	1	15	1	1	0	0	0
OTUNew.ReferenceOTU71	0	0	269	0	268	3	37	0	0	8	3	0	16	15	0	0	57	3	71	0	0	81	0	58	0	0	134	15	62	0	169	0	111	0	20	0	29	0	42	0	84	0	42	0	0	0	0	0	32
OTUNew.ReferenceOTU607	0	0	0	0	0	0	0	0	0	0	0	0	0	0	0	0	0	0	0	0	0	0	0	0	0	0	0	20	0	0	0	0	0	0	0	0	0	0	0	0	0	24	17	37	3	1	0	7	22
OTU699298	3	3	17	0	42	436	442	67	470	8	30	1	108	68	11	1	37	0	0	0	10	58	0	0	1	0	0	1	0	0	0	0	0	3	12	0	2	0	1	0	0	0	0	0	1	0	0	0	1
OTU179922	4	0	10	2	29	29	164	6	24	0	40	0	13	16	3	4	18	10	16	3	6	48	30	287	12	3	35	3	31	3	16	0	28	4	115	8	54	9	31	3	11	1	45	6	1	3	7	8	9
OTU582305	4	68	0	22	0	0	0	11	0	68	0	5	0	0	4	116	0	51	0	41	5	0	143	0	94	111	0	21	0	75	0	152	0	1	0	10	0	43	0	98	0	6	0	17	0	71	0	11	0
OTUNew.CleanUp.ReferenceOTU5	0	0	8	0	1	15	152	3	5	2	0	0	0	36	8	2	15	4	0	0	12	1405	3	1	1	0	0	0	10	0	0	0	0	0	66	0	0	0	0	0	0	0	0	0	0	2	1	0	0
OTU329101	13	35	0	43	0	18	0	20	13	17	7	136	23	0	19	6	0	37	0	38	7	0	42	0	29	40	1	15	0	3	4	26	0	7	5	24	3	20	0	186	4	7	1	8	0	15	10	11	0
OTU873518	0	0	64	0	72	7	58	7	2	1	7	0	0	27	0	0	55	1	129	0	1	35	0	40	0	0	29	18	12	0	57	0	26	0	8	2	55	3	92	1	14	11	67	155	1	0	60	86	12
OTUNew.CleanUp.ReferenceOTU6	299	220	0	61	0	37	4	353	0	178	1	89	0	0	41	147	2	69	0	130	0	0	44	0	24	34	0	0	0	3	0	1	0	1	0	4	0	4	0	8	0	1	0	1	0	1	0	3	0
OTUNew.ReferenceOTU589	5	0	8	8	12	116	19	0	448	0	252	0	184	21	2	1	60	0	13	0	0	11	1	24	2	0	28	47	25	0	5	0	15	0	3	5	12	0	14	0	6	2	23	6	2	0	11	2	6
OTUNew.CleanUp.ReferenceOTU4	7	2	0	0	0	0	0	5	0	0	0	0	0	0	229	0	0	0	0	0	11	32	0	8	0	0	0	0	0	0	0	0	0	183	75	1169	1	12	0	0	0	0	0	0	0	0	0	5	1
OTUNew.ReferenceOTU426	17	63	0	24	2	2	3	190	0	47	0	48	0	0	10	43	0	106	0	119	17	1	18	0	7	63	2	0	1	39	0	35	0	22	11	13	0	87	0	163	0	5	0	54	0	18	4	15	3
OTU543576	25	104	0	49	0	0	0	155	0	46	0	63	0	1	15	44	1	80	0	79	4	2	93	0	69	60	0	14	0	49	0	251	0	2	2	3	5	88	0	214	0	1	0	14	0	39	0	17	2
OTUNew.ReferenceOTU86	47	324	0	120	0	0	0	87	0	99	0	149	0	0	15	84	0	59	0	109	24	3	33	0	25	92	0	2	0	31	0	75	0	10	1	27	0	59	0	65	0	37	0	56	0	24	0	9	0
OTUNew.ReferenceOTU48	0	40	0	44	0	0	0	0	0	17	0	156	0	0	0	11	0	62	0	57	2	0	2	0	6	111	0	0	0	5	0	75	0	0	0	1	0	23	0	321	0	0	0	0	0	238	0	0	0
OTU584994	10	57	0	22	0	12	0	130	25	12	2	51	8	8	13	45	1	94	0	49	5	28	12	17	38	40	0	5	99	35	0	179	0	14	17	7	37	22	14	34	0	1	0	8	0	5	0	2	45
OTUNew.CleanUp.ReferenceOTU10	0	47	0	360	0	0	0	1	0	95	0	567	0	0	0	6	0	138	0	235	1	0	1	0	3	133	1	1	0	3	0	38	0	0	0	1	0	7	0	41	0	2	0	0	0	4	0	0	0
OTU296473	0	27	0	5	0	0	1	17	104	4	15	12	20	0	33	30	1	18	25	12	91	5	53	37	161	29	47	51	15	34	1	92	9	41	9	82	12	41	0	6	1	4	13	13	0	6	69	1	0
OTUNew.CleanUp.ReferenceOTU17	10	11	0	21	0	4	0	44	73	24	69	11	18	34	28	36	11	4	0	7	22	338	14	8	25	7	0	37	90	27	0	18	0	14	84	58	1	17	0	14	0	4	4	5	7	4	0	39	18
OTUNew.ReferenceOTU544	0	3	818	5	645	2	42	1	0	0	0	0	0	0	0	0	1	0	0	0	0	16	0	0	0	0	5	0	0	0	0	0	0	0	2	0	0	0	0	0	0	0	1	0	0	0	0	0	0
OTU3001126	19	18	0	20	0	75	5	36	24	0	2	6	4	6	56	17	6	35	1	32	19	15	10	3	32	23	1	8	0	14	0	2	2	12	5	8	7	35	1	39	2	15	4	23	1	25	25	25	3
OTU2770485	0	0	6	0	0	3	21	0	0	0	0	0	0	0	0	0	0	0	0	0	0	3	0	0	0	0	0	2	18	0	0	0	0	0	0	0	19	0	6	0	0	0	2	0	1	0	0	0	3
OTUNew.CleanUp.ReferenceOTU16	0	0	0	0	0	41	166	0	0	0	0	0	0	0	0	0	0	2	0	4	1	7	0	3	0	0	2	11	5	2	3	1	10	0	7	2	52	17	65	2	14	20	605	29	3	0	207	36	61
OTU814675	37	82	9	65	4	18	3	105	0	129	2	111	0	8	13	95	8	77	6	105	17	14	135	4	54	57	18	13	3	70	7	20	8	13	15	18	13	38	5	2	0	0	3	6	0	0	14	13	1
OTU190052	331	22	0	0	0	237	4	178	6	0	0	0	0	186	586	0	19	0	0	0	6	29	0	11	0	0	0	0	2	0	0	0	0	10	21	9	4	0	0	0	0	0	0	0	0	0	0	0	0
OTU4402734	0	2	0	0	0	18	55	0	2	0	1	0	1	69	5	25	22	48	0	16	2	19	31	0	7	180	0	0	0	11	0	82	0	3	0	4	0	3	0	89	0	0	0	0	0	388	0	0	0
OTU831640	82	57	0	68	0	0	0	243	3	43	1	119	0	2	12	62	0	101	0	113	13	16	78	0	73	64	0	7	0	16	0	10	0	7	0	12	0	35	0	94	0	1	0	4	0	27	0	0	0
OTU239190	8	25	0	2	0	0	1	55	0	1	0	0	0	0	0	22	0	75	0	37	0	0	5	0	18	33	0	2	0	4	0	2	8	0	0	1	4	9	1	23	1	4	54	27	0	6	20	164	29
OTU816752	0	0	0	0	0	60	13	0	2	0	4	0	2	1	2	2	33	9	37	0	0	2	0	14	0	0	0	2	1	0	0	0	0	0	0	0	14	0	2	0	3	1	8	0	0	0	4	2	0
OTUNew.ReferenceOTU65	17	1	0	11	0	39	0	197	169	40	92	0	107	6	92	20	0	3	0	0	9	0	11	0	33	12	1	2	0	21	0	65	0	12	0	1	0	0	0	0	0	1	0	9	0	0	1	3	0
OTU4352855	0	0	1	0	2	2	23	0	0	0	0	1	0	0	0	0	0	0	0	0	0	8	1	1	0	0	0	8	16	0	2	0	3	0	0	0	35	0	27	0	4	0	4	0	0	0	0	0	2
OTU315191	38	101	1	78	8	2	0	174	0	44	1	55	0	29	20	43	16	92	4	100	53	7	90	5	47	77	19	6	7	31	8	61	22	23	3	29	2	26	3	93	1	3	1	5	0	13	3	11	0
OTUNew.ReferenceOTU311	62	11	0	16	0	18	0	87	0	5	0	4	0	0	18	4	10	17	0	16	8	0	21	0	38	8	1	4	0	7	0	11	0	0	0	1	0	16	0	7	0	2	0	3	0	4	1	0	0
OTUNew.ReferenceOTU470	14	44	96	43	143	109	7	71	17	31	14	1	1	4	7	36	6	23	4	16	21	18	49	0	37	16	20	13	11	34	11	58	32	13	2	14	24	24	20	28	23	0	4	9	2	2	0	29	5
OTU4325321	0	135	0	283	0	0	0	6	0	115	0	360	0	1	1	30	2	90	0	491	0	0	2	0	4	65	0	0	0	1	0	0	0	0	1	0	0	0	0	8	0	0	0	1	0	0	0	0	0
OTU307401	0	0	0	0	1	0	5	0	0	0	0	0	0	0	0	0	0	0	0	0	0	0	0	11	0	0	2	12	286	0	319	0	369	0	17	1	73	0	33	3	309	0	66	0	0	0	0	0	29
OTU811414	59	120	0	92	3	36	0	298	161	51	65	16	53	1	35	46	13	15	0	7	104	5	38	12	85	9	3	9	16	23	4	4	0	21	11	35	1	13	0	27	0	1	1	4	1	9	0	1	1
OTU831789	2	0	1	0	5	5	3	10	61	2	62	1	177	10	10	0	9	2	6	0	1	2	1	0	1	4	2	5	2	0	1	3	1	4	0	0	8	6	6	3	0	5	4	27	0	4	62	4	1
OTU832894	1	72	0	78	0	0	0	12	0	51	0	37	0	0	3	36	0	41	0	37	5	0	45	0	110	106	0	51	0	27	0	389	0	0	0	7	0	27	0	163	0	0	0	8	0	42	0	1	0
OTU228552	15	33	0	5	1	26	0	132	3	1	0	1	0	6	24	35	0	23	0	26	7	0	45	0	22	19	0	20	1	40	0	28	0	2	0	8	1	27	0	61	0	3	0	9	0	19	15	1	1
OTU340767	40	9	0	0	0	11	1	123	3	1	0	0	0	4	16	0	9	5	0	0	5	9	5	0	3	1	1	1	0	2	0	0	14	10	7	6	5	9	1	5	5	2	27	5	0	0	207	2	6
OTU2381147	8	2	0	6	0	0	0	2	0	0	0	1	0	0	1	0	0	0	0	0	0	1	0	1	0	0	0	3	27	0	25	2	8	2	0	0	53	0	22	0	0	2	31	0	0	0	0	0	25
OTU634455	3	3	16	3	36	62	125	12	5	0	1	0	2	5	0	4	47	0	20	0	7	119	2	54	0	0	84	151	115	1	105	0	98	13	51	8	143	0	84	0	72	0	13	5	0	0	0	2	2
OTU591460	7	65	5	4	15	27	34	18	2	12	0	5	11	13	19	15	29	21	76	25	12	372	7	127	6	9	79	14	21	0	17	5	4	6	34	0	68	3	26	38	2	2	47	12	1	0	0	194	38
OTU589627	2	47	0	53	0	0	0	242	0	23	0	81	0	0	21	6	0	38	0	68	23	7	40	0	79	35	0	22	0	20	0	12	0	4	0	14	0	54	0	18	0	7	0	60	0	11	1	6	0
OTUNew.ReferenceOTU73	13	0	0	0	0	90	5	34	12	0	0	0	0	6	1	0	0	2	0	0	0	0	1	1	1	0	0	1	0	4	1	0	10	5	0	4	1	3	0	1	0	0	3	1	0	0	117	1	0
OTU53331	13	3	134	2	104	55	146	9	9	3	8	2	10	76	6	2	90	1	81	1	12	111	7	54	7	3	65	10	22	3	31	0	54	4	17	9	65	0	35	1	40	0	25	3	0	0	0	6	4
OTU547139	0	13	0	2	0	2	0	9	0	7	0	0	0	1	8	0	0	4	0	16	0	2	0	0	2	11	0	1	0	7	0	6	2	0	1	2	0	28	0	13	0	16	0	30	0	5	3	10	0
OTU4479541	2	10	0	4	0	0	0	72	0	5	0	0	0	0	1	22	0	51	1	15	2	0	72	0	45	37	0	7	0	37	0	209	0	4	0	0	0	156	0	153	0	0	0	13	0	35	0	0	0
OTU343990	25	18	9	11	29	0	8	81	2	16	0	3	0	11	77	8	18	6	16	3	215	36	24	15	51	18	10	23	12	20	6	18	4	195	93	236	65	10	19	5	11	1	10	19	1	1	4	44	2
OTU227866	0	1	0	1	0	12	0	8	9	0	0	0	3	4	0	3	1	8	0	7	1	0	10	2	5	2	5	3	0	2	0	2	4	0	0	0	0	1	0	2	0	0	3	6	0	1	83	5	1
OTUNew.ReferenceOTU39	0	92	0	88	0	0	0	0	0	61	0	132	0	0	0	27	0	152	0	184	1	0	2	0	5	116	0	0	0	0	0	537	0	0	0	0	0	15	0	134	0	0	0	0	0	3	0	0	0
OTU101620	1	0	0	0	0	89	0	2	12	3	13	0	0	7	2	1	11	0	0	1	1	0	0	35	0	0	0	9	0	2	0	0	2	0	0	0	0	19	0	1	0	22	1	68	0	3	19	1	2
OTU436590	1	4	134	2	153	9	94	0	0	1	0	0	2	5	0	0	21	1	23	0	0	29	0	27	0	0	80	19	18	0	83	1	101	0	8	0	60	4	128	0	157	0	48	0	1	0	0	0	44
OTUNew.CleanUp.ReferenceOTU7	11	197	0	147	0	1	1	153	0	177	0	270	0	0	20	102	0	93	0	199	0	0	26	0	10	55	0	3	0	2	0	51	0	0	0	0	1	6	0	30	0	0	0	0	0	0	0	0	0
OTUNew.ReferenceOTU548	30	11	31	4	13	215	124	46	154	0	25	0	16	209	48	5	229	0	5	0	31	96	6	10	7	1	8	49	13	0	12	0	14	32	33	8	9	2	10	0	2	1	6	1	1	1	0	4	1
OTU232114	6	4	0	5	0	0	0	3	0	2	0	13	0	3	4	9	0	5	0	15	3	0	6	0	2	1	0	0	0	7	0	0	0	0	0	1	2	21	0	10	0	20	0	38	0	6	8	9	1
OTU834924	2	50	0	10	0	88	0	31	9	2	1	5	0	11	13	4	0	47	0	17	4	3	1	0	18	7	1	7	0	8	0	44	0	13	0	1	0	7	0	73	0	33	0	19	0	36	0	0	0
OTU807496	0	54	0	406	0	0	0	0	0	100	0	279	0	1	0	1	0	75	0	521	1	0	1	1	2	72	0	0	0	0	0	1	0	0	0	0	0	0	0	16	0	0	0	0	0	0	0	0	0
OTUNew.ReferenceOTU538	23	224	0	200	0	3	0	19	0	172	1	166	0	2	3	85	2	145	0	120	79	31	5	0	4	0	1	0	0	0	0	0	0	182	28	33	0	0	1	0	0	0	0	0	0	0	0	0	0
OTU108446	5	55	3	3	1	17	8	44	9	11	6	20	1	1	16	61	2	109	2	76	3	1	37	2	39	32	5	10	7	23	0	82	2	1	0	7	4	19	0	48	0	5	0	26	0	11	6	6	0
OTU352252	29	42	0	13	0	0	0	351	2	14	0	0	0	4	19	37	0	48	0	6	28	12	53	0	42	61	0	22	0	61	0	63	0	9	3	25	0	40	0	145	0	9	0	10	0	42	1	3	0
OTUNew.ReferenceOTU85	0	198	0	343	0	0	0	3	1	168	0	381	0	0	1	10	0	31	0	281	0	0	1	0	0	91	0	0	0	0	0	0	0	0	1	0	0	0	0	13	0	0	0	0	0	0	0	0	0
OTU341702	5	1	30	1	30	23	27	0	0	0	0	0	0	0	0	0	1	0	0	0	0	1	0	2	0	0	0	3	6	0	3	0	0	0	4	0	20	0	15	0	1	0	3	0	0	0	0	0	3
OTUNew.ReferenceOTU56	5	197	0	92	0	0	0	44	0	72	1	289	1	0	3	118	0	220	0	204	0	0	15	0	31	202	0	0	0	0	0	19	0	0	0	0	0	0	0	4	0	0	0	0	0	0	0	0	0
OTUNew.ReferenceOTU140	143	2	0	0	0	29	0	260	3	0	0	0	0	25	140	0	1	0	0	0	95	63	11	3	2	0	2	4	4	6	0	0	0	81	97	409	11	3	0	0	0	3	0	25	0	0	0	35	1
OTU4467949	3	56	0	12	4	5	3	6	52	13	13	15	26	3	9	24	3	16	10	9	3	10	24	5	13	20	8	104	25	19	3	19	9	7	0	26	30	15	16	27	8	14	100	36	14	10	52	102	25
OTU742904	0	0	0	0	0	0	0	0	0	0	0	0	0	22	2	0	8	0	0	0	0	9	0	0	0	0	0	0	0	0	0	0	0	0	0	0	0	0	0	0	0	1	0	6	0	0	0	1	0
OTU825365	4	2	0	1	0	45	49	9	58	4	0	0	0	22	8	3	19	1	1	0	12	109	1	28	5	4	0	2	161	10	2	0	0	0	71	0	0	9	1	26	0	2	2	16	0	20	7	6	0
OTU611680	7	8	117	0	98	50	166	2	0	0	0	2	1	0	1	0	20	0	6	0	5	124	1	3	1	0	25	12	20	3	42	0	62	3	1	4	183	0	151	3	110	0	93	1	1	0	0	0	23
OTU270320	0	3	0	2	1	6	0	7	58	0	34	0	50	53	13	22	325	0	31	0	27	520	7	43	5	3	0	51	22	0	0	0	0	13	38	16	13	0	0	0	0	0	23	4	19	0	0	7	54
OTU706364	0	0	0	0	3	0	0	0	0	0	1	0	15	5	0	1	4	2	4	0	0	2	0	20	0	0	0	0	24	4	0	0	6	0	1	0	1	0	3	0	0	1	17	11	0	0	147	94	7
OTU337042	3	1	0	0	0	0	0	1	0	3	0	0	0	0	0	16	1	2	0	0	0	15	9	0	5	0	0	6	0	9	0	0	0	2	0	3	0	26	0	1	0	14	4	48	1	0	0	63	16
OTU4340870	99	140	0	75	0	10	0	405	0	76	0	148	0	6	66	18	0	67	0	89	5	0	35	0	14	58	1	3	0	2	0	78	0	2	0	5	0	31	0	31	0	1	0	2	0	4	0	9	0
OTU581691	4	38	0	35	0	0	0	32	0	21	0	32	0	0	9	58	0	23	0	53	7	0	5	1	22	37	0	3	0	9	0	12	0	4	0	4	0	36	0	26	0	26	0	40	0	21	0	14	0
OTU293440	6	4	36	0	40	40	59	5	20	1	6	0	0	16	1	8	3	62	13	6	5	8	23	46	33	71	2	14	32	32	5	10	2	5	8	4	58	107	23	21	8	1	6	8	1	9	1	3	11
OTUNew.ReferenceOTU67	2	40	19	30	23	41	58	41	69	24	37	56	47	58	20	17	59	31	8	73	9	27	32	123	37	21	2	21	26	22	47	48	68	4	17	4	5	26	13	28	4	2	10	1	1	1	0	4	6
OTU695253	39	45	0	24	0	2	0	247	0	1	1	10	0	1	1	28	3	85	0	38	40	0	93	2	163	46	0	16	3	36	0	22	0	5	0	3	11	29	1	53	2	0	4	11	0	5	14	13	5
OTUNew.ReferenceOTU50	3	3	0	2	1	24	19	9	14	5	3	3	6	7	0	5	19	36	4	14	12	15	70	1	12	28	0	4	4	4	0	31	0	0	5	1	0	33	3	151	0	9	0	5	0	26	0	2	2
OTUNew.ReferenceOTU266	3	4	1	3	3	146	66	61	383	8	211	2	233	179	7	57	28	7	0	0	13	29	3	0	4	4	0	5	0	6	0	0	0	7	5	3	0	0	0	0	0	0	0	0	0	0	0	0	0
OTUNew.ReferenceOTU174	5	2	16	1	19	30	73	2	0	0	0	0	0	0	0	2	14	21	34	7	2	5	12	21	2	0	317	10	16	0	218	6	406	4	5	3	51	0	68	0	49	0	6	0	0	0	0	0	1
OTU1909414	0	1	0	9	0	5	0	9	5	13	0	89	0	0	10	3	1	25	0	47	18	0	22	0	10	29	1	12	0	27	0	83	0	29	0	20	1	59	0	383	0	12	0	33	1	48	0	12	0
OTUNew.ReferenceOTU96	38	4	0	6	0	29	0	14	0	7	0	9	0	11	229	21	2	2	0	10	210	15	22	2	16	10	0	1	0	19	0	1	0	60	51	148	14	16	2	36	2	1	4	29	0	5	1	44	2
OTU574650	6	19	0	3	1	2	0	46	1	2	0	4	0	1	4	16	0	22	1	15	7	5	23	1	13	14	5	2	0	4	0	13	2	6	2	16	1	34	0	97	0	23	4	89	0	9	50	14	0
OTUNew.CleanUp.ReferenceOTU20	0	0	19	0	7	0	0	1	0	0	0	0	0	0	16	0	0	2	5	2	0	8	0	0	3	0	48	0	15	0	35	11	132	0	0	0	4	0	17	11	576	1	0	3	0	0	0	0	0
OTU3819483	0	0	0	0	2	4	17	0	0	0	0	0	0	0	0	0	0	0	0	0	0	0	0	0	0	0	0	0	0	0	0	0	0	0	0	0	5	0	2	0	0	1	0	1	0	0	0	0	0
OTU239851	11	11	0	3	0	0	0	101	0	3	1	29	0	0	0	38	8	33	0	37	0	5	4	0	0	11	0	0	2	7	0	35	0	3	0	0	3	26	0	48	1	8	5	104	0	15	3	356	14
OTUNew.ReferenceOTU136	0	0	0	0	0	0	0	0	2	0	0	0	1	0	0	0	0	2	0	0	0	0	0	0	0	0	0	0	1	0	1	0	1	1	0	0	0	0	0	0	1	3	3	0	0	0	80	1	0
OTU534378	29	2	2	6	0	13	56	7	2	7	0	0	0	11	0	0	8	0	1	0	4	26	13	289	4	0	0	4	471	5	32	3	22	14	94	0	10	3	25	0	0	0	74	0	0	0	0	0	14
OTUNew.ReferenceOTU201	0	9	0	0	0	0	0	3	0	1	0	0	0	1	1	14	0	15	0	19	3	1	17	0	10	27	0	7	0	25	0	122	0	1	1	6	0	69	0	66	0	25	1	27	0	29	1	1	0
OTU4396399	2	0	55	0	72	0	7	0	0	1	22	0	0	25	3	21	210	6	101	1	11	150	2	21	2	5	177	24	13	7	28	7	34	2	6	2	34	0	25	2	5	0	28	8	0	0	0	131	6
OTUNew.ReferenceOTU231	397	379	0	15	0	33	0	43	4	0	0	0	0	20	298	4	15	0	0	0	0	20	0	10	0	0	0	0	4	0	0	0	0	12	59	0	15	0	1	0	0	0	0	3	0	0	0	63	2
OTU1111431	1	0	0	1	0	6	0	92	0	0	0	0	0	2	0	3	3	21	0	7	6	12	12	0	8	11	2	23	0	34	0	14	0	7	3	2	2	3	0	26	0	4	0	15	0	1	26	13	4
OTUNew.ReferenceOTU455	0	0	0	18	0	2	0	0	74	0	17	1	54	1	11	20	0	47	0	68	24	3	13	43	41	73	13	9	5	56	5	79	8	19	14	25	4	24	0	65	0	6	5	11	0	14	41	4	1
OTUNew.CleanUp.ReferenceOTU13	0	5	0	3	0	1	0	3	0	1	0	0	0	2	8	8	2	0	1	0	19	186	7	187	5	1	1	18	8	1	0	18	0	28	198	1	39	10	0	6	1	2	11	4	5	2	0	19	63
OTUNew.ReferenceOTU51	0	0	27	0	39	13	52	0	6	0	1	0	0	7	1	3	13	0	29	0	0	35	5	271	0	0	20	4	149	0	112	0	156	2	34	0	83	0	127	0	28	0	24	0	0	0	0	0	10
OTUNew.CleanUp.ReferenceOTU8	0	0	4	0	2	0	0	0	0	0	0	0	0	11	0	0	25	1	138	0	0	5	0	5	0	0	249	0	6	0	88	0	273	0	0	0	92	0	163	0	164	1	134	0	2	0	0	3	32
OTU537954	10	4	96	1	112	12	50	11	9	6	9	0	4	42	8	13	26	4	53	1	8	29	4	40	9	2	232	15	32	0	53	0	62	3	10	2	68	3	134	1	152	0	6	0	1	0	0	3	0
OTU719874	37	41	0	15	0	21	6	130	65	14	10	22	10	30	14	40	7	27	8	17	86	13	49	12	54	7	10	12	7	24	9	19	3	70	11	80	11	9	0	6	0	3	4	18	0	0	12	11	1
OTUNew.ReferenceOTU244	9	287	0	90	0	0	0	18	0	110	0	160	0	0	4	453	0	57	0	40	0	0	89	0	20	31	0	7	0	4	0	0	0	0	0	0	0	20	0	0	0	0	0	0	0	0	0	1	0
OTU1108952	8	45	0	60	1	13	0	50	6	8	0	45	0	1	20	73	1	85	0	80	37	3	32	0	36	105	0	14	0	17	0	108	0	10	1	8	0	25	0	74	0	6	0	9	0	27	4	12	0
OTU104788	0	48	0	129	0	0	0	7	0	24	1	55	0	0	0	20	0	136	0	179	1	0	2	0	10	90	0	3	0	21	0	100	0	0	0	1	0	14	0	143	0	2	1	0	0	58	0	0	0
OTU426848	1	5	198	0	274	4	71	0	2	0	2	0	0	17	0	2	38	0	19	0	0	17	0	7	0	0	302	0	72	0	96	0	97	2	0	0	4	0	14	0	114	0	2	0	1	0	0	0	0
OTU558898	0	88	0	130	0	0	1	5	0	62	0	103	0	0	9	47	0	83	0	88	2	0	14	1	5	105	0	1	0	24	0	46	0	8	2	33	1	10	0	142	0	3	0	6	0	78	0	1	0
OTU261971	6	3	0	0	10	1	3	20	23	0	7	1	4	0	0	0	0	12	0	5	3	13	5	5	8	12	6	1	4	0	2	1	14	0	5	1	16	9	6	39	12	6	15	34	0	4	38	6	4
OTU263385	14	3	0	1	0	81	4	22	180	2	11	2	53	5	5	11	3	14	4	9	3	0	25	13	10	6	4	3	1	9	0	5	1	3	0	3	4	5	2	19	3	3	14	17	0	1	69	8	4
OTU860929	3	0	0	0	0	0	0	2	8	0	16	0	31	40	0	0	59	0	2	0	0	1	0	7	0	0	1	8	3	0	0	0	0	0	0	0	5	0	0	0	0	0	5	4	1	0	25	1	8
OTUNew.ReferenceOTU68	6	38	0	25	0	0	0	131	0	62	0	36	0	0	8	41	0	39	0	18	35	0	101	0	84	59	0	23	1	34	0	186	0	9	0	37	0	36	0	72	0	3	0	7	0	37	0	0	0
OTUNew.CleanUp.ReferenceOTU685	31	65	0	57	0	7	0	28	0	18	0	62	0	0	28	38	2	24	0	27	17	9	34	0	21	30	0	40	0	13	0	19	0	14	10	33	2	14	0	27	0	65	2	14	0	80	0	14	0
OTUNew.CleanUp.ReferenceOTU9	62	101	4	128	17	28	33	53	8	40	0	0	0	12	4	9	5	2	1	0	38	101	2	155	7	0	17	29	81	7	57	15	77	24	67	4	40	11	18	3	0	0	9	2	1	0	0	13	12
OTUNew.CleanUp.ReferenceOTU28	0	43	0	345	0	1	0	1	0	73	0	475	0	0	0	1	1	37	0	301	0	0	0	0	0	56	0	0	0	0	0	2	0	1	0	0	1	1	0	0	0	0	0	0	0	0	0	0	0
OTUNew.ReferenceOTU132	2	372	0	56	1	0	0	50	0	308	0	203	0	1	0	87	0	101	0	80	0	0	1	0	2	32	0	0	0	2	0	10	0	0	0	2	0	1	0	6	0	0	0	0	0	0	0	0	0
OTUNew.ReferenceOTU277	6	35	0	15	2	87	0	151	65	22	9	80	1	2	31	40	0	18	2	3	57	5	78	0	115	20	0	17	2	44	0	23	0	11	0	28	1	14	0	4	0	1	1	11	3	0	0	0	0
OTUNew.ReferenceOTU373	1	9	194	0	289	17	90	2	34	1	18	1	15	43	0	3	43	0	34	0	2	57	2	18	7	7	131	2	15	0	33	4	51	0	2	2	11	3	12	0	106	1	5	0	0	0	0	1	0
OTU25107	0	0	0	0	0	0	0	8	0	0	0	0	0	1	16	11	2	9	0	3	6	25	10	0	6	2	0	1	1	23	0	5	0	0	0	2	0	12	0	7	0	1	0	16	0	1	0	7	0
OTU567945	5	62	0	47	0	0	0	64	1	22	0	35	0	0	5	67	0	135	0	64	25	5	11	0	29	128	0	19	0	63	0	131	0	19	4	12	0	42	0	107	0	3	0	12	0	22	0	8	0
OTU821649	35	6	0	1	0	15	0	275	4	3	0	0	0	2	47	0	1	4	0	0	22	1	313	0	329	5	0	13	0	11	0	39	0	4	3	27	3	14	0	5	0	0	0	15	0	4	0	2	0
OTU346941	47	97	0	26	0	1	0	195	0	18	0	12	0	2	12	56	0	66	0	61	15	6	57	0	41	67	0	13	0	41	0	74	0	10	2	25	1	38	0	106	0	4	1	9	0	11	0	2	0
OTUNew.ReferenceOTU177	0	65	0	11	0	0	0	5	0	40	0	160	0	0	0	196	0	258	0	217	4	0	16	0	24	110	0	8	0	36	0	31	0	0	1	4	0	14	0	35	0	1	0	0	0	6	2	0	0
OTUNew.ReferenceOTU393	18	66	0	67	0	2	0	211	3	84	0	265	0	1	11	120	0	65	0	70	20	4	105	0	38	30	0	0	0	9	0	4	0	7	2	44	3	19	0	1	0	1	0	3	0	0	0	19	0
OTUNew.ReferenceOTU563	0	0	0	0	0	0	0	0	0	0	0	0	0	0	2	0	2	0	0	0	2	2	0	0	0	0	0	8	0	0	0	0	0	0	0	0	0	13	0	6	0	8	0	23	0	4	0	23	15
OTU1129766	16	2	0	9	0	71	2	19	67	0	1	0	3	7	6	3	4	4	0	6	5	3	9	13	13	10	1	0	0	11	0	6	1	5	2	13	0	4	0	11	0	11	9	23	0	7	35	9	2
OTU1108696	25	26	43	22	59	27	24	21	59	5	14	14	28	34	1	6	3	24	75	0	9	19	24	38	12	11	137	22	7	0	26	5	28	3	2	1	21	18	13	2	26	7	28	3	0	1	62	3	5
OTU146541	85	3	0	0	0	45	0	77	0	0	0	0	0	31	190	0	0	0	0	0	107	64	0	5	0	0	0	19	0	0	0	0	0	200	85	268	18	0	0	0	0	0	0	6	3	0	0	8	2
OTUNew.ReferenceOTU229	8	0	0	0	7	2	1	0	35	0	12	0	10	9	0	0	15	0	1	1	1	0	8	3	3	0	0	809	9	1	0	0	0	5	0	1	3	5	0	0	1	3	17	48	22	0	8	2	1
OTU153668	12	11	12	2	28	49	18	29	73	4	56	3	74	20	23	30	48	18	13	5	14	18	33	57	21	22	10	76	7	16	1	24	4	5	17	10	45	37	11	15	14	4	5	42	3	5	12	13	2
OTU616053	2	0	0	0	0	12	52	9	0	2	0	0	0	7	10	122	0	6	0	5	41	75	14	0	3	15	0	4	2	5	3	27	0	0	0	0	0	8	0	26	3	2	9	10	0	130	1	12	0
OTU830253	3	7	6	2	1	7	59	20	12	5	21	9	3	7	2	4	14	7	10	3	1	38	33	8	26	5	2	2	21	12	22	19	9	0	28	0	11	6	15	16	1	0	49	3	0	8	24	9	2
OTU551941	24	4	3	1	2	21	75	1	7	0	0	0	0	6	6	2	9	0	0	0	3	105	0	83	2	0	0	39	28	0	13	0	7	3	95	3	60	0	48	0	0	0	49	3	10	0	0	13	274
OTU335858	18	7	0	0	0	6	0	43	0	0	0	0	0	6	138	1	0	0	0	0	151	20	7	0	0	2	0	0	1	0	0	0	0	317	42	458	2	0	0	0	0	1	0	14	0	0	0	6	0
OTUNew.ReferenceOTU116	0	1	2	1	2	201	57	37	433	0	110	0	138	99	36	9	28	3	1	0	12	22	3	1	6	0	0	1	1	0	0	0	0	3	3	11	0	0	0	1	0	0	0	1	3	0	0	3	0
OTUNew.CleanUp.ReferenceOTU19	2	40	0	16	0	0	0	67	0	11	0	33	0	0	23	30	4	84	0	40	15	0	20	0	36	62	0	9	0	32	1	77	0	16	9	6	0	57	0	118	0	15	0	31	0	29	0	4	0
OTUNew.ReferenceOTU258	104	423	0	39	0	2	0	223	0	15	0	0	0	4	72	81	4	16	0	0	10	6	24	0	11	10	0	10	0	56	0	7	0	4	1	9	0	75	0	1	0	0	1	2	0	0	0	2	2
OTUNew.ReferenceOTU195	16	150	0	61	0	0	0	61	0	103	1	419	0	0	22	25	0	59	1	104	2	1	72	0	19	37	0	2	0	5	0	4	0	0	0	0	0	16	0	7	0	1	0	2	0	0	0	0	0
OTU592855	0	4	0	0	0	7	21	1	17	1	37	5	27	2	3	4	3	7	0	4	1	13	0	7	1	2	1	2	26	4	10	0	10	0	2	0	2	7	2	2	4	3	8	5	0	1	4	2	0
OTU338740	6	70	0	66	0	0	0	96	1	29	0	95	0	0	10	31	0	42	0	65	3	4	26	0	16	90	0	1	0	28	0	189	0	5	2	5	0	30	0	178	0	0	0	0	0	13	0	0	0
OTUNew.ReferenceOTU427	0	0	0	0	0	0	0	0	0	0	4	0	0	2	0	6	0	29	0	12	12	1	38	0	29	13	0	17	0	27	0	2	0	5	0	2	13	141	0	35	1	24	1	79	0	15	1	7	3
OTUNew.ReferenceOTU479	1	0	0	1	0	5	23	1	18	0	0	2	8	2	0	2	0	10	0	1	9	4	0	0	10	0	0	4	0	0	0	57	0	0	0	0	1	40	0	5	0	15	0	48	0	8	12	0	0
OTU823094	36	137	0	62	0	99	0	111	34	52	3	49	0	17	28	23	6	49	0	57	35	3	47	0	30	101	0	1	0	8	0	96	0	20	7	14	0	0	0	45	0	0	0	5	0	3	0	0	0
OTUNew.ReferenceOTU308	31	2	0	0	0	25	9	44	0	0	3	0	0	3	12	0	2	42	3	15	10	16	24	15	46	6	2	9	4	32	0	0	0	8	3	2	24	33	1	21	7	2	21	15	0	8	17	85	2
OTU546723	9	28	0	2	0	0	0	22	0	0	0	6	0	0	15	112	0	146	0	42	29	7	74	0	37	149	0	10	0	118	0	32	0	6	0	29	0	81	1	31	0	17	0	14	0	18	0	4	0
OTUNew.ReferenceOTU122	0	0	0	0	0	22	77	0	13	0	82	0	41	381	33	0	378	0	0	0	0	7	0	0	0	0	0	0	0	0	0	0	0	0	0	0	0	0	0	0	0	0	0	0	0	0	0	0	2
OTU307281	0	0	0	0	0	0	0	0	0	0	0	0	0	0	0	0	0	0	0	0	0	0	0	0	0	0	0	10	26	0	0	0	0	0	0	0	10	0	0	0	0	0	0	0	1	0	0	0	0
OTUNew.ReferenceOTU491	60	102	0	18	2	0	0	127	0	22	0	40	0	0	27	58	0	20	0	7	8	0	98	0	67	7	0	11	0	14	0	0	0	0	0	72	1	24	0	14	0	2	0	5	0	9	0	18	0
OTUNew.ReferenceOTU437	9	30	0	22	0	0	0	153	0	4	0	12	0	0	17	9	0	34	0	42	17	1	23	0	61	21	0	24	0	16	0	5	0	5	0	14	0	26	0	16	0	7	0	51	0	17	0	7	0
OTUNew.ReferenceOTU436	3	1	78	3	136	5	22	0	0	0	0	0	18	3	0	0	0	0	22	0	4	26	5	58	4	0	156	5	9	0	46	1	37	0	6	7	37	0	68	0	281	0	19	0	1	0	0	0	5
OTU4431375	3	112	0	44	0	0	0	8	0	70	0	21	0	0	5	141	0	20	0	15	6	0	41	0	44	161	0	5	0	39	0	170	0	2	0	2	0	22	0	32	0	3	0	2	0	14	0	2	0
OTU4337033	67	88	0	11	0	3	1	207	0	54	0	12	0	0	10	42	0	37	0	23	2	1	60	0	7	29	0	11	0	27	0	212	0	7	2	8	1	137	0	55	0	5	0	6	0	7	0	0	0
OTU4298976	34	17	0	7	0	81	0	230	95	17	81	15	71	12	15	36	35	13	0	4	20	10	23	0	7	15	0	64	0	7	0	12	0	17	0	19	2	9	3	1	0	0	4	19	11	4	0	1	0
OTUNew.CleanUp.ReferenceOTU14	1	1	0	0	0	16	0	18	126	5	0	4	4	4	1	185	51	182	117	26	106	4	45	1	112	16	1	10	0	4	0	0	1	2	0	1	2	5	0	2	1	2	1	2	0	0	2	0	1
OTU1123587	0	55	0	82	0	6	5	8	11	16	19	46	37	24	0	8	38	20	2	46	2	26	3	8	0	9	0	0	4	0	7	0	20	0	3	0	0	0	0	8	0	1	7	4	0	0	55	4	3
OTUNew.ReferenceOTU424	5	0	0	0	3	49	7	0	250	0	41	0	124	2	0	0	3	0	3	0	0	0	2	6	1	0	4	6	3	0	1	0	1	0	1	1	2	0	3	0	0	8	29	11	0	0	22	5	12
OTUNew.CleanUp.ReferenceOTU1312	18	16	21	3	59	48	22	38	51	18	13	16	7	18	10	19	44	12	14	2	20	28	27	7	7	10	26	14	21	4	32	6	84	8	11	33	56	1	36	0	68	2	104	13	6	3	0	28	13
OTU109455	7	12	0	1	1	3	1	51	0	4	0	0	0	0	9	14	2	5	0	7	0	1	10	0	21	7	2	8	0	22	2	10	0	2	0	3	0	29	0	29	0	2	0	17	0	8	1	4	1
OTU4392747	9	1	32	0	13	55	105	0	0	0	0	0	1	0	1	0	0	0	11	1	2	60	2	2	0	0	16	8	20	0	15	1	27	1	1	4	140	0	48	0	105	0	18	0	1	0	0	1	3
OTU316989	1	8	0	2	1	0	0	5	2	7	3	3	0	8	34	37	2	32	0	26	13	12	64	3	24	29	0	15	0	18	0	7	1	11	7	6	16	7	3	8	0	9	2	14	0	2	6	45	6
OTU119942	0	0	0	0	0	2	0	0	0	0	11	0	3	4	0	2	25	8	2	3	0	8	21	19	20	5	0	0	13	10	11	20	3	0	0	0	19	9	0	4	0	9	38	12	0	7	75	56	11
OTUNew.ReferenceOTU440	1	151	0	66	0	0	0	57	0	32	0	30	0	0	3	15	0	69	0	67	8	1	36	0	38	24	0	9	0	33	0	42	0	1	0	3	0	43	0	167	0	4	0	5	0	37	0	0	0
OTU569669	9	4	0	0	0	3	0	17	0	2	0	8	1	0	4	18	1	11	0	5	3	1	7	5	9	6	1	0	4	2	2	2	3	0	2	19	0	0	0	6	1	0	6	1	0	2	109	0	1
OTUNew.CleanUp.ReferenceOTU1531	12	31	0	0	0	55	0	43	407	10	68	24	120	18	7	7	5	42	0	23	4	3	32	0	36	31	0	18	2	17	0	20	0	2	2	9	0	14	0	25	0	0	0	4	0	1	7	1	1
OTU352343	0	95	0	208	0	0	0	0	0	73	0	140	0	0	0	32	0	73	0	112	2	0	5	0	11	105	0	0	0	15	0	42	0	0	0	0	0	7	0	105	0	6	0	1	0	34	0	0	0
OTU149368	0	106	2	337	0	0	0	0	0	59	0	282	0	0	0	26	0	52	0	146	0	0	1	0	1	106	0	0	0	0	0	4	0	0	0	0	0	0	0	9	0	0	0	0	0	0	0	0	0
OTU722984	2	58	0	43	0	20	0	104	5	40	7	28	1	19	0	41	0	168	0	199	28	7	40	0	27	174	0	4	0	20	0	6	0	16	0	10	0	2	0	7	0	0	0	2	0	4	0	0	0
OTUNew.ReferenceOTU89	1	0	0	1	0	4	12	0	0	0	0	0	0	0	0	0	0	0	0	0	0	0	0	0	0	0	0	4	11	0	0	0	0	0	0	0	15	0	10	0	0	0	2	1	0	0	0	0	0
OTU111871	3	218	0	58	0	0	0	79	0	61	0	4	0	0	0	76	0	79	0	30	4	0	15	0	13	56	0	0	0	12	0	110	0	1	0	0	0	80	0	110	0	9	0	24	0	28	0	0	0
OTUNew.ReferenceOTU118	6	83	0	36	0	0	0	61	18	10	23	13	22	18	28	68	7	91	0	59	8	0	43	0	72	93	0	18	0	71	0	93	0	8	2	20	0	35	0	23	0	2	0	4	0	4	0	0	0
OTUNew.CleanUp.ReferenceOTU547	22	9	81	1	186	21	29	14	60	12	20	8	9	20	2	0	12	4	8	2	20	70	12	18	3	4	43	8	14	0	12	3	50	1	5	15	84	1	54	4	59	0	23	3	0	0	0	0	11
OTUNew.ReferenceOTU181	0	0	0	0	1	16	4	0	6	0	3	0	50	2	0	0	8	0	3	0	0	55	0	22	0	0	21	20	44	0	18	0	4	6	107	0	13	1	8	0	0	1	581	0	11	0	2	0	68
OTUNew.CleanUp.ReferenceOTU39	0	6	0	2	0	27	32	3	42	7	1	0	0	9	1	2	14	0	0	0	6	58	0	49	3	0	0	80	113	0	0	0	0	5	39	2	3	0	7	0	0	0	405	6	7	0	0	11	136
OTU819433	11	3	0	19	0	0	0	124	0	0	0	3	0	0	2	0	0	9	0	12	1	1	32	0	41	17	0	4	0	7	0	11	0	1	0	1	0	35	0	18	0	3	0	10	0	2	0	0	0
OTU4333380	12	8	0	0	0	0	0	55	0	0	0	0	0	1	72	0	0	0	0	0	374	11	8	6	3	0	1	0	0	0	0	3	0	118	23	368	10	4	0	0	0	0	0	12	0	0	0	8	0
OTU169294	0	4	140	0	185	26	103	1	25	0	19	0	0	64	5	0	65	1	13	0	2	58	0	77	0	0	79	0	26	0	11	1	38	0	3	0	0	1	25	0	34	0	4	0	0	0	0	0	6
OTUNew.ReferenceOTU477	1	1	0	11	0	6	0	111	91	1	124	11	123	1	3	3	0	0	0	0	3	0	0	0	32	4	0	2	0	10	0	30	0	0	0	0	0	3	0	0	0	0	1	0	1	0	5	3	0
OTUNew.CleanUp.ReferenceOTU33	52	10	0	4	0	4	0	61	0	0	0	0	0	6	247	3	2	0	0	1	41	62	3	5	3	0	0	0	0	0	0	5	0	387	107	67	7	0	0	0	0	0	0	0	0	0	0	2	0
OTUNew.CleanUp.ReferenceOTU11	0	0	1	0	5	173	685	0	0	1	0	0	9	18	6	0	36	0	0	0	0	92	0	0	0	0	0	2	0	0	0	0	0	2	7	0	7	0	16	0	0	0	21	0	0	0	0	0	6
OTU311505	0	0	0	0	0	1	0	0	0	0	3	0	2	13	7	27	36	0	1	0	2	63	0	0	3	0	0	5	0	0	0	0	0	1	0	0	0	0	0	2	0	14	9	30	0	2	23	13	6
OTU788929	0	3	0	0	0	0	2	0	0	0	0	0	0	0	0	0	0	0	0	0	0	0	0	0	0	0	0	2	1	0	0	0	0	0	0	0	13	0	2	0	0	0	0	2	0	0	0	0	0
OTUNew.ReferenceOTU62	1	24	0	1	0	0	1	17	0	0	0	0	0	2	37	258	0	157	0	94	22	0	74	0	48	103	0	4	0	77	0	58	0	1	3	7	0	54	0	11	0	0	0	0	1	6	0	2	1
OTUNew.ReferenceOTU111	1	2	26	0	25	0	14	6	1	0	5	0	3	1	0	7	23	0	36	0	3	43	22	24	1	0	39	6	51	0	24	0	31	0	114	2	129	0	63	0	17	0	138	0	1	0	0	6	73
OTUNew.CleanUp.ReferenceOTU29	0	0	0	0	0	22	0	2	27	0	2	0	6	6	0	1	0	1	0	11	0	0	1	0	9	0	0	46	0	0	0	5	0	0	0	0	0	2	0	4	0	1	0	0	3	3	0	7	0
OTU4456340	10	58	1	1	0	4	0	59	0	2	0	0	0	7	71	1	0	0	0	0	116	8	21	6	1	0	0	14	1	4	0	0	0	54	15	576	11	11	0	0	0	0	0	7	0	0	0	13	0
OTUNew.ReferenceOTU186	72	16	0	7	0	4	0	198	0	0	0	6	0	1	42	19	1	91	0	33	34	7	105	1	73	20	0	26	1	25	0	24	0	8	11	9	4	13	0	34	0	2	1	9	0	6	0	47	2
OTUNew.ReferenceOTU606	7	55	0	27	0	0	0	49	0	32	0	27	0	0	3	37	0	54	0	70	2	3	54	0	28	30	0	11	0	16	0	41	0	3	4	10	0	25	0	78	0	1	1	17	0	18	0	8	0
OTU1133579	0	0	0	0	0	0	3	11	3	0	0	0	2	29	161	12	1	0	0	0	13	54	4	6	4	0	0	16	7	4	1	16	0	57	161	6	34	0	0	0	0	0	3	5	2	2	0	17	1
OTU693029	11	2	2	0	0	68	35	11	0	0	0	0	0	2	6	7	21	1	0	3	24	39	2	68	6	3	0	6	66	3	4	5	1	107	94	2	136	53	37	2	0	0	5	63	1	0	0	3	76
OTU229993	20	17	2	0	9	15	25	169	1	8	0	0	0	5	6	14	5	1	12	0	6	20	35	3	73	0	9	9	3	4	0	0	0	0	0	6	8	11	2	3	1	0	2	6	0	1	7	6	0
OTU310035	0	0	0	3	0	0	0	0	0	0	0	0	0	0	0	2	0	0	0	1	0	0	0	0	0	0	0	0	0	0	0	0	0	0	0	0	0	0	0	0	0	0	0	0	0	0	0	0	0
OTU4229057	0	0	0	3	0	9	1	2	6	6	0	8	2	195	30	6	119	14	1	2	18	290	13	0	4	2	0	42	6	7	0	0	0	2	50	1	4	1	0	2	0	3	60	7	5	0	4	85	2
OTU584468	15	107	0	57	0	0	0	43	1	45	1	32	0	1	9	79	0	78	0	94	7	0	47	0	37	35	0	7	0	146	0	25	2	1	0	23	2	40	0	7	0	3	0	5	0	1	0	0	1
OTU538443	2	63	0	99	0	0	0	6	0	20	0	73	0	0	0	46	0	132	0	196	1	2	1	0	2	65	0	7	0	20	0	47	0	0	0	2	0	19	0	64	0	0	0	0	0	32	0	1	0
OTU293261	5	0	64	0	90	5	19	1	3	3	0	0	1	19	0	0	25	0	51	0	0	33	0	4	0	0	78	3	37	0	94	0	88	0	29	2	70	3	58	0	70	0	4	0	0	0	1	0	0
OTU4358876	42	68	0	1	0	4	0	66	0	3	1	0	0	3	191	6	1	0	0	0	34	22	5	0	0	2	0	6	0	0	0	7	0	419	52	58	6	0	0	0	0	0	0	4	0	1	0	10	0
OTU361082	8	4	0	0	0	0	0	2	0	1	0	0	0	0	0	0	1	0	0	0	0	0	0	0	0	0	0	45	2	0	2	0	2	0	0	0	12	4	6	0	0	0	0	0	2	0	0	0	3
OTU4449319	2	8	72	27	107	13	14	24	14	19	8	43	1	1	8	3	0	44	0	29	3	0	30	0	220	46	0	21	0	45	0	8	0	5	0	5	0	6	0	2	0	0	0	0	0	0	0	0	0
OTU136876	0	33	0	21	0	0	0	2	11	45	18	33	15	51	5	34	59	21	0	19	0	10	5	0	32	19	0	4	0	24	0	12	0	0	0	2	2	3	0	10	0	0	5	3	0	4	9	16	0
OTU4386403	25	35	0	59	0	0	0	159	0	9	0	111	0	0	3	0	0	93	0	112	2	0	7	0	5	109	0	0	0	6	0	86	0	0	1	1	0	16	0	45	1	3	0	2	0	15	0	1	0
OTUNew.ReferenceOTU270	2	0	0	0	3	51	6	7	309	6	239	0	261	31	25	13	5	2	1	0	9	20	0	3	0	2	0	0	0	1	0	0	0	0	1	0	0	0	0	0	0	0	2	0	0	2	0	0	0
OTU4408298	6	6	167	0	137	6	29	10	0	8	2	0	0	50	1	0	47	0	22	0	3	17	8	3	1	0	65	0	19	0	29	0	55	1	12	0	6	0	3	0	5	0	3	0	0	0	0	0	0
OTUNew.ReferenceOTU342	1	61	0	21	1	0	0	0	0	74	0	181	0	0	0	138	0	51	0	102	8	0	77	0	20	22	0	6	0	41	0	37	0	7	0	78	0	4	0	33	0	0	0	1	0	13	0	0	0
OTU1712358	7	22	0	20	0	1	0	29	3	12	2	10	0	3	1	8	1	29	0	18	8	0	22	0	11	40	0	4	0	7	0	10	0	5	1	10	0	60	0	155	1	23	0	65	0	31	0	0	0
OTU540589	10	2	0	0	0	11	65	2	7	0	0	0	4	50	4	0	75	0	2	0	9	84	5	12	4	0	3	6	88	2	0	0	0	7	154	0	21	6	5	0	0	3	9	16	1	0	1	0	27
OTU4481553	13	0	0	2	0	0	0	0	0	0	0	0	0	0	0	0	0	0	0	0	0	0	0	0	0	0	0	0	0	0	0	0	0	0	0	0	4	0	0	0	0	1	0	0	0	0	0	0	1
OTUNew.CleanUp.ReferenceOTU15	4	7	5	4	4	38	5	7	25	0	13	5	2	41	7	2	15	3	43	0	29	89	13	17	57	10	144	8	8	0	1	0	4	90	42	33	42	3	16	11	7	0	20	2	3	4	0	18	6
OTU825320	0	82	0	290	1	0	0	2	0	45	0	196	0	0	0	11	0	65	0	227	0	0	0	0	0	56	0	0	0	0	0	7	0	0	1	0	0	0	0	5	0	0	1	0	0	0	0	0	0
OTUNew.CleanUp.ReferenceOTU51	8	0	1	1	7	4	0	16	11	0	7	0	13	4	0	3	1	4	0	0	2	12	2	0	1	1	1	2	3	0	0	1	2	1	7	0	10	2	2	4	0	24	13	47	1	14	4	7	8
OTU103210	0	1	0	3	0	1	40	0	0	0	0	1	0	0	0	0	0	0	0	0	0	1	0	0	0	0	0	1	2	0	0	0	0	1	0	0	7	0	3	0	0	0	0	0	0	0	0	0	0
OTUNew.CleanUp.ReferenceOTU43	6	1	0	2	0	3	0	70	0	0	0	1	0	2	141	3	0	0	0	3	40	63	4	7	7	2	0	2	3	1	0	2	0	133	126	349	11	2	0	4	0	0	0	0	0	0	0	1	0
OTU136584	0	1	0	0	0	1	0	4	53	4	28	2	47	3	0	3	0	19	0	0	2	1	3	32	7	9	2	13	0	12	0	37	1	0	3	1	1	13	0	18	0	6	9	7	1	5	5	35	2
OTU826195	0	0	0	0	0	39	0	4	2	0	2	0	0	3	0	0	29	5	13	6	0	0	0	30	0	0	0	0	2	1	0	0	2	0	0	0	5	0	4	3	2	9	28	11	0	0	120	0	10
OTU343315	0	1	0	0	0	0	0	0	0	0	0	0	0	0	0	1	0	0	12	0	0	0	0	27	0	3	11	3	3	1	5	0	7	0	0	0	0	0	0	3	0	0	38	0	0	0	60	10	1
OTUNew.ReferenceOTU492	8	3	33	1	32	11	20	4	1	0	2	0	3	5	0	0	12	0	16	0	1	29	0	29	0	0	26	0	35	0	13	0	25	0	42	2	10	0	11	0	6	0	6	0	0	0	18	4	4
OTU4364607	0	126	0	46	0	0	0	5	1	75	0	20	0	0	0	24	0	33	0	35	0	0	0	0	0	34	1	0	0	0	0	437	0	0	0	0	0	22	0	111	0	0	0	0	0	0	0	0	0
OTU4368477	1	1	2	0	3	1	1	1	2	1	1	1	0	1	0	1	2	0	3	2	0	0	1	4	0	0	1	0	4	0	3	3	1	1	1	0	1	0	1	2	3	0	0	3	0	0	14	0	1
OTUNew.CleanUp.ReferenceOTU48	0	0	0	0	0	0	0	0	0	0	0	0	0	0	0	0	0	0	0	0	0	0	0	0	0	0	0	0	0	0	0	0	0	0	0	0	0	0	0	0	0	0	1	0	0	0	18	0	0
OTUNew.CleanUp.ReferenceOTU140	2	0	14	0	29	2	4	2	14	0	0	0	2	0	0	0	2	0	1	1	4	11	0	1	1	0	18	2	6	0	0	2	32	3	2	1	23	2	17	1	7	7	39	24	0	1	39	2	11
OTU644572	1	0	25	0	65	55	126	0	0	0	0	0	1	9	1	0	57	0	1	0	1	80	0	10	0	0	15	24	40	0	29	0	43	1	18	0	56	0	112	0	56	0	35	0	0	0	0	0	17
OTUNew.ReferenceOTU484	0	0	6	0	21	5	41	0	0	0	0	0	0	0	0	0	0	0	23	0	0	30	0	9	0	0	64	0	21	0	66	0	36	0	0	0	10	0	64	0	534	0	13	0	0	0	0	2	0
OTU317507	4	0	0	2	0	6	18	0	0	0	0	0	0	0	0	0	1	0	0	0	0	2	0	0	0	0	0	2	0	0	0	0	1	0	0	0	8	0	0	0	0	3	0	0	0	0	0	0	1
OTU136482	0	0	0	6	1	0	3	28	1	0	0	3	0	0	0	0	0	4	0	0	0	7	3	1	0	5	1	0	3	0	0	4	0	0	0	0	6	17	0	4	2	1	1	23	0	0	21	0	2
OTU1118847	6	2	2	0	2	139	22	12	249	1	121	0	116	65	7	13	56	3	0	0	6	29	7	3	6	2	0	23	9	0	0	1	1	2	5	8	8	0	2	0	4	0	0	0	0	0	0	4	1
OTU827729	0	163	0	180	0	0	0	0	0	133	0	303	0	0	0	0	1	19	0	94	0	0	0	0	0	60	0	0	0	0	0	0	0	0	0	0	0	0	0	3	0	0	0	0	0	0	0	0	0
OTU18223	3	87	0	52	4	0	0	42	0	89	0	107	0	2	8	69	4	42	0	29	1	1	110	0	46	27	0	17	0	10	0	52	0	4	0	1	0	24	0	12	0	0	0	1	0	2	0	0	0
OTUNew.CleanUp.ReferenceOTU23	0	0	0	0	0	10	0	0	5	0	48	0	3	87	6	0	83	0	11	0	2	142	1	90	0	0	12	4	15	0	11	0	7	4	40	1	7	4	12	0	0	0	19	1	0	0	1	9	3
OTUNew.ReferenceOTU88	4	234	0	195	0	0	0	16	0	125	0	171	0	0	0	27	0	45	0	60	0	0	1	0	5	32	0	0	0	5	0	18	0	0	0	0	1	1	0	6	0	0	0	3	0	0	0	0	0
OTU198202	8	26	0	26	0	0	0	21	0	24	0	119	0	0	0	4	0	60	0	417	0	0	1	0	44	96	1	5	0	28	0	3	0	0	0	0	0	34	0	7	0	0	0	0	0	0	0	0	0
OTU549701	53	83	0	0	0	3	0	198	0	14	0	0	0	12	392	0	0	0	0	0	2	5	0	0	0	0	0	0	1	0	0	0	0	88	55	35	0	0	0	0	0	0	0	1	0	0	0	0	0
OTUNew.CleanUp.ReferenceOTU63	5	33	0	14	0	6	7	16	3	31	0	44	0	65	5	9	41	9	0	18	3	40	39	0	21	28	4	27	8	17	0	116	1	1	16	7	7	15	0	48	0	3	8	3	1	49	0	9	2
OTU2651333	15	10	11	8	5	29	66	15	66	7	40	3	24	61	40	17	94	11	4	0	25	75	18	2	7	2	2	36	12	1	8	0	0	33	21	7	18	8	19	0	1	0	2	4	3	0	0	8	0
OTU4470886	3	8	2	2	0	2	11	0	0	1	0	0	0	0	2	0	3	0	4	0	1	2	3	5	0	0	5	11	49	0	123	5	101	0	1	4	44	0	74	0	0	0	44	0	0	0	0	2	4
OTUNew.CleanUp.ReferenceOTU18	65	94	0	34	0	1	0	241	0	49	0	19	0	0	19	57	0	76	0	92	42	13	31	0	5	11	0	2	0	1	0	0	0	33	6	33	0	2	0	0	0	1	0	3	0	0	0	2	0
OTUNew.ReferenceOTU469	15	19	0	7	0	140	6	153	59	17	28	5	20	7	54	62	3	21	0	15	5	2	53	1	34	17	0	10	0	18	0	79	0	4	0	25	0	14	0	1	0	0	0	1	1	0	1	5	0
OTUNew.ReferenceOTU133	1	0	22	0	14	3	90	0	0	0	0	0	0	8	0	2	30	1	13	0	8	350	3	48	0	0	6	1	29	0	14	0	3	0	107	0	24	0	63	0	3	0	9	0	1	0	0	0	3
OTUNew.ReferenceOTU59	0	5	0	3	1	0	5	15	0	0	0	1	0	1	13	20	3	0	5	8	0	31	12	11	14	0	18	1	20	0	22	1	11	2	13	2	22	7	42	0	23	0	3	0	0	0	0	10	9
OTU866811	0	46	0	76	0	0	0	0	0	13	0	38	0	0	0	6	0	51	0	106	0	0	1	0	3	24	0	0	0	15	0	17	0	0	0	0	0	0	0	51	0	1	0	1	0	33	0	0	0
OTUNew.ReferenceOTU556	20	61	0	23	0	0	0	122	0	14	0	30	0	1	87	25	0	32	0	40	22	4	32	0	11	16	0	5	0	41	0	92	0	4	4	49	0	34	0	56	0	1	0	0	0	11	0	19	0
OTUNew.CleanUp.ReferenceOTU22	6	1	217	0	222	14	44	1	5	0	15	16	10	8	1	0	74	0	12	0	4	9	0	4	2	2	45	0	1	0	4	0	6	3	0	1	0	0	2	0	17	0	0	0	0	0	0	0	0
OTU750263	0	6	0	2	0	0	0	0	1	7	0	0	0	0	0	0	0	0	0	0	0	0	1	0	0	0	0	5	0	0	0	0	0	0	0	0	3	0	2	0	0	0	0	0	0	0	0	0	0
OTU709353	3	24	6	0	8	47	63	18	6	0	32	0	4	9	4	1	50	1	10	0	0	43	17	11	9	0	5	11	15	0	0	0	5	0	5	0	6	2	1	2	2	0	12	3	1	0	0	5	0
OTU227690	4	8	1	0	2	23	0	7	15	0	9	1	4	0	1	6	5	6	0	1	2	16	10	10	2	1	4	4	0	2	3	13	2	5	3	1	3	5	4	18	4	3	8	13	0	2	44	5	1
OTUNew.CleanUp.ReferenceOTU192	1	5	0	4	0	0	0	2	0	3	0	5	0	0	0	0	4	8	0	0	0	3	16	0	3	3	0	1	0	0	0	0	0	0	0	0	0	11	0	11	0	5	0	5	0	5	0	0	0
OTU535675	28	38	1	25	0	9	14	32	1	31	1	59	7	2	47	7	0	4	0	5	1	4	37	3	84	2	1	7	0	9	0	15	0	0	0	2	3	15	0	36	0	1	0	26	0	4	2	1	0
OTUNew.ReferenceOTU191	0	15	0	1	0	0	0	9	0	29	0	17	0	0	1	6	0	29	0	15	0	0	2	0	12	13	0	4	1	17	0	240	0	0	0	4	0	75	1	360	0	2	0	0	0	14	0	0	0
OTU325206	0	0	0	0	0	0	0	0	0	0	0	0	0	0	0	0	0	0	0	0	0	0	0	2	0	0	0	6	23	0	2	0	1	0	0	0	58	0	34	0	0	0	5	1	0	0	0	0	3
OTU629852	0	2	0	0	0	0	0	0	0	0	0	0	0	0	0	1	0	0	0	0	0	0	0	0	0	0	0	9	0	0	0	0	0	0	0	0	9	0	1	0	0	0	0	0	0	0	0	0	2
OTU176313	5	2	0	0	0	69	0	29	270	5	92	0	123	11	22	22	8	1	11	0	11	0	13	27	10	0	10	0	0	0	1	0	0	2	0	1	0	0	0	0	0	4	1	4	0	0	2	4	0
OTUNew.CleanUp.ReferenceOTU21	27	0	1	4	3	49	46	33	9	0	0	0	0	45	99	25	28	1	8	0	10	37	9	17	5	1	1	6	13	1	1	2	5	13	98	7	72	9	13	0	0	0	3	16	0	0	0	50	5
OTU712002	0	3	0	0	2	0	0	0	0	0	0	0	1	0	0	11	0	6	0	3	0	0	0	0	0	2	0	13	0	2	0	0	13	3	0	0	18	0	7	2	14	4	209	12	1	0	96	168	19
OTUNew.ReferenceOTU379	8	8	97	4	93	3	11	1	0	0	0	0	0	0	0	0	6	0	0	0	0	6	0	0	0	0	11	0	3	0	10	0	16	0	0	0	15	0	17	19	491	0	0	0	0	0	0	0	0
OTUNew.ReferenceOTU61	2	239	0	2	0	0	0	362	2	269	0	0	0	0	0	0	0	0	0	0	0	0	0	0	0	0	0	0	0	0	0	0	0	0	0	0	0	0	0	0	0	0	0	0	0	0	0	0	0
OTUNew.ReferenceOTU451	17	65	0	11	7	7	6	64	0	8	0	61	0	8	10	19	1	23	1	18	5	14	59	0	41	19	2	6	1	23	8	106	1	2	0	15	23	22	19	70	2	2	5	4	0	10	0	2	4
OTUNew.ReferenceOTU558	69	36	0	4	0	0	0	44	0	8	0	11	0	0	36	45	0	30	0	25	13	10	60	0	16	29	0	15	0	87	0	23	0	12	7	18	0	57	0	20	0	13	0	16	0	5	0	5	0
OTUNew.CleanUp.ReferenceOTU24	2	156	0	69	0	0	0	10	0	107	0	241	0	1	0	15	0	63	0	129	0	0	4	0	0	47	0	0	0	0	0	9	0	0	0	0	0	0	0	15	0	0	0	0	0	0	0	0	0
OTU624911	98	44	0	44	2	29	1	34	86	15	17	70	15	2	4	20	0	26	0	42	7	0	5	0	17	14	0	28	1	6	0	0	2	1	1	0	1	10	0	10	0	2	0	0	1	16	14	1	0
OTU338473	13	4	0	2	0	2	0	74	0	0	0	0	0	3	123	0	0	0	0	0	164	19	5	0	4	0	0	0	0	2	0	0	0	148	16	267	4	6	0	0	0	0	0	0	0	0	0	10	0
OTU4350815	9	4	74	0	108	18	40	12	4	2	4	0	0	37	0	7	70	2	9	0	0	29	1	4	1	0	49	3	11	0	48	0	41	0	7	0	42	0	56	0	76	0	8	0	0	0	0	2	0
OTU255261	5	2	59	0	115	22	59	0	0	1	0	0	0	18	11	6	13	0	9	0	3	29	0	24	0	0	11	2	16	0	34	0	15	0	17	1	26	0	35	0	13	0	16	0	0	0	0	1	10
OTUNew.ReferenceOTU185	3	8	1	0	6	13	21	6	0	12	4	3	4	24	5	83	190	85	1	4	28	17	176	1	64	11	0	3	2	3	1	0	0	7	13	3	3	0	1	0	0	0	34	0	0	0	0	0	3
OTU118817	5	0	0	0	0	122	1	8	92	0	18	0	19	21	7	0	5	9	0	1	33	5	66	1	28	0	0	12	0	2	0	25	1	16	4	58	0	0	0	3	0	4	1	18	0	2	0	4	4
OTU234994	0	1	0	1	1	2	1	2	2	0	0	0	2	0	0	0	2	1	0	0	0	0	0	1	0	1	0	0	0	0	1	1	0	0	1	2	0	2	0	2	0	0	0	1	0	0	6	0	0
OTU1110493	0	7	0	0	0	0	0	0	0	0	0	0	0	0	0	13	0	39	0	6	3	0	9	0	4	14	0	2	0	3	0	0	0	0	0	0	0	0	0	2	0	5	0	4	0	4	0	0	0
OTU561699	0	2	0	0	0	2	0	20	174	16	77	6	375	0	0	10	0	13	0	11	1	0	6	0	9	4	0	8	0	3	0	22	0	1	0	2	0	21	0	12	0	1	0	2	0	0	0	4	0
OTU1108367	2	0	10	5	24	6	32	4	13	0	67	0	68	46	7	0	114	0	16	0	0	46	3	92	0	0	37	7	22	0	12	4	32	1	43	0	11	4	0	0	1	1	69	0	1	0	5	1	18
OTUNew.ReferenceOTU143	4	0	0	1	0	11	0	24	3	0	0	0	0	9	0	1	0	7	0	0	0	10	4	0	1	2	0	0	0	6	0	0	0	8	10	6	0	12	0	1	0	7	2	122	0	4	12	38	1
OTUNew.CleanUp.ReferenceOTU41	0	0	0	0	0	0	6	0	8	0	2	0	7	5	1	0	11	0	0	0	0	4	0	0	0	0	0	2	4	0	0	0	6	0	0	0	0	0	0	1	5	3	47	0	1	0	4	1	0
OTU4457349	0	10	2	3	0	4	0	17	112	1	6	3	37	0	0	5	0	17	0	27	3	0	5	0	25	17	2	8	0	38	0	254	0	0	0	3	2	33	0	20	0	1	1	7	0	0	1	8	2
OTU327027	0	4	0	5	11	10	2	4	104	0	123	1	192	0	0	11	23	6	14	4	3	11	3	62	14	9	71	0	24	8	17	0	16	1	6	2	61	0	5	0	17	0	0	0	0	0	0	0	0
OTU346672	0	2	15	0	14	3	14	2	0	4	16	4	6	9	2	4	53	16	49	2	1	35	9	85	3	1	189	0	47	2	46	3	77	4	9	5	16	0	30	0	18	0	6	5	0	0	0	29	2
OTUNew.ReferenceOTU582	10	68	0	19	0	0	0	79	0	16	0	15	0	0	19	42	0	64	0	35	23	3	45	0	23	47	0	5	0	30	0	57	0	7	2	35	0	29	0	61	0	6	0	15	0	16	0	1	0
OTU820137	0	54	0	82	0	0	0	6	0	21	0	42	1	0	0	45	0	55	0	95	1	0	17	0	13	39	0	8	0	9	0	56	0	3	0	1	0	45	0	60	0	20	0	28	0	23	0	2	0
OTUNew.ReferenceOTU197	3	2	0	1	0	7	13	6	15	4	15	14	27	4	3	2	86	2	4	3	1	58	10	28	4	2	2	0	9	0	0	0	0	1	4	4	2	1	0	3	0	0	0	0	0	0	1	0	0
OTUNew.CleanUp.ReferenceOTU31	5	79	0	38	0	2	0	27	0	55	0	40	0	0	14	59	0	86	0	90	17	5	7	0	6	58	0	6	0	86	0	2	0	4	18	29	1	14	0	1	0	3	0	0	0	9	0	3	0
OTUNew.CleanUp.ReferenceOTU588	1	0	15	2	3	3	17	3	2	0	5	0	2	10	4	10	7	0	6	0	0	19	3	13	2	1	9	7	65	4	16	0	11	1	44	1	59	1	25	0	3	2	159	4	1	0	0	1	34
OTUNew.CleanUp.ReferenceOTU64	1	27	0	11	0	0	0	39	0	2	0	4	0	9	0	3	30	85	0	41	4	8	8	0	1	43	1	3	4	12	0	76	0	2	0	0	0	28	0	113	0	0	3	11	0	33	1	1	0
OTU326603	0	0	0	6	0	0	0	0	0	0	0	0	0	0	0	0	0	0	0	0	0	0	0	3	0	0	0	3	13	0	0	0	0	0	2	0	31	0	19	0	0	0	1	1	0	0	0	0	2
OTU560172	2	33	0	8	0	0	0	170	0	9	0	20	0	2	0	26	0	57	0	29	10	6	31	0	48	121	0	3	0	16	0	67	0	4	9	4	0	13	0	37	0	1	0	0	0	6	0	0	0
OTUNew.CleanUp.ReferenceOTU55	5	0	0	0	0	0	0	5	0	0	0	0	0	0	0	0	0	0	0	0	1	0	0	0	0	1	0	0	0	0	0	0	0	0	0	0	0	1	0	0	0	1	2	0	0	1	18	0	0
OTU825053	15	63	0	0	0	0	0	38	0	0	0	0	0	1	137	0	0	3	0	0	139	27	4	0	0	0	0	0	0	0	0	0	0	210	19	146	3	5	0	0	0	0	0	0	0	0	0	5	0
OTU101990	0	178	0	82	0	0	0	10	1	65	0	61	0	0	0	28	0	54	0	66	0	0	7	0	1	27	0	0	0	4	0	137	0	0	0	0	0	21	0	69	0	5	0	0	0	1	0	0	0
OTU4413494	10	3	9	2	5	102	83	37	60	1	17	0	11	118	54	11	94	1	2	9	17	68	16	0	4	0	0	15	1	3	0	2	2	23	7	5	4	2	2	2	0	0	0	0	0	0	0	3	0
OTU831730	0	58	0	41	0	0	0	0	0	37	0	52	0	0	0	57	0	99	0	97	0	0	21	0	15	84	0	4	0	57	0	54	0	0	0	0	0	38	0	32	0	8	0	14	0	32	0	0	0
OTU593817	0	93	0	107	0	0	0	9	0	39	0	162	0	0	0	3	0	114	0	180	0	0	7	0	7	79	0	0	0	0	0	11	0	0	0	0	0	0	0	7	0	0	0	0	0	0	0	0	0
OTU833575	0	6	0	8	0	47	1	3	8	7	0	1	3	2	20	1	0	6	3	6	2	1	3	8	4	3	0	2	1	9	0	14	0	1	0	4	4	0	0	11	0	3	3	12	0	10	21	3	1
OTU2599642	116	8	0	6	0	45	0	93	0	20	0	24	0	1	46	2	1	9	0	10	5	45	0	13	1	10	0	6	0	2	0	7	0	27	15	26	19	20	0	16	0	1	0	5	0	0	0	188	1
OTU1138724	56	47	0	11	0	7	12	79	1	10	0	6	0	10	20	26	25	15	0	13	17	21	38	1	9	10	0	11	4	24	0	14	0	12	11	12	19	29	17	9	0	5	6	6	0	9	0	18	4
OTU234197	0	27	0	28	0	0	0	8	0	25	0	21	0	0	0	9	0	32	0	25	0	0	4	3	6	2	0	0	0	0	0	0	0	1	0	0	0	12	0	5	0	3	1	16	0	0	24	0	0
OTUNew.ReferenceOTU363	24	1	0	0	0	70	0	66	121	3	55	0	119	10	33	30	2	0	0	0	0	1	5	0	10	0	0	6	0	6	0	2	0	0	0	0	0	0	0	0	0	0	0	7	1	0	4	1	0
OTU318745	0	0	22	0	23	2	0	0	0	0	0	0	0	0	0	0	0	0	0	0	0	5	0	1	0	0	1	6	68	0	52	0	36	0	10	0	23	0	18	0	26	0	16	0	1	0	0	0	10
OTUNew.ReferenceOTU72	2	8	0	14	0	0	0	131	0	0	0	33	0	0	4	12	0	16	0	29	3	0	17	0	13	15	0	5	0	17	0	12	0	1	0	6	0	15	0	72	0	0	0	3	0	14	0	0	0
OTU229420	11	31	0	19	1	2	0	48	0	7	0	18	0	0	9	60	1	66	0	32	9	3	11	0	19	31	0	14	0	23	0	35	0	6	1	2	1	18	0	39	0	5	0	7	0	18	0	1	0
OTU850520	0	106	0	129	0	0	0	19	0	39	0	44	0	0	0	0	0	70	0	48	0	0	6	0	19	32	0	0	0	12	0	42	0	0	0	0	0	4	0	100	0	1	0	0	0	29	0	0	0
OTU1095022	17	24	49	6	25	6	50	15	14	4	11	7	0	48	34	5	68	8	35	1	19	71	9	9	10	0	85	2	30	2	19	3	22	14	28	6	0	5	4	0	0	0	3	0	2	0	0	1	1
OTU788551	14	99	5	18	7	62	10	37	19	5	1	6	4	21	24	40	19	8	4	6	3	24	9	3	58	11	0	6	6	7	0	12	0	11	16	6	36	2	8	5	3	1	21	7	0	1	26	0	2
OTUNew.ReferenceOTU483	8	0	34	0	53	17	38	10	0	0	0	0	0	0	0	0	0	0	8	0	0	11	0	9	1	0	87	6	22	0	48	0	75	1	7	1	37	2	39	1	181	0	17	0	1	0	0	1	4
OTU335454	0	0	0	0	0	0	0	0	0	0	0	0	0	0	0	0	0	0	0	0	0	0	0	0	0	0	0	0	0	0	0	0	0	0	0	0	4	0	0	0	0	0	0	0	0	0	0	0	0
OTUNew.CleanUp.ReferenceOTU49	0	0	0	2	0	0	0	0	0	0	0	0	0	0	0	25	0	12	0	2	2	1	10	0	39	14	0	34	0	35	0	34	0	0	0	3	0	26	0	15	0	1	0	0	0	4	0	0	1
OTU229650	0	0	0	0	0	0	0	0	0	0	0	0	0	0	0	0	0	1	0	0	0	0	0	0	0	0	0	0	0	0	0	0	4	0	0	0	0	0	0	0	0	0	0	0	0	0	30	0	0
OTUNew.CleanUp.ReferenceOTU44	1	0	81	1	122	4	87	7	3	0	0	0	0	6	1	0	0	0	1	0	3	24	1	53	0	0	8	8	34	0	39	0	44	0	24	1	17	0	46	0	38	0	48	3	0	0	0	0	9
OTUNew.CleanUp.ReferenceOTU172	0	0	0	0	0	149	44	10	135	2	119	0	18	127	21	12	114	0	1	0	7	32	2	0	0	0	0	0	0	0	0	0	0	0	1	0	0	0	0	0	0	0	0	0	0	0	0	0	1
OTU4339479	10	34	0	37	0	4	0	32	0	2	0	41	0	5	2	13	0	15	0	17	1	4	50	2	43	8	0	6	0	9	0	12	0	5	5	0	5	11	0	9	0	2	1	39	0	0	0	4	0
OTU158267	0	14	0	9	0	6	0	37	31	6	1	4	25	0	7	2	0	7	0	2	5	0	11	0	17	3	0	2	0	9	0	6	0	0	0	0	0	6	0	7	1	0	1	1	0	1	25	2	0
OTUNew.CleanUp.ReferenceOTU26	0	0	97	0	135	2	13	1	0	0	0	0	0	17	0	0	1	0	17	0	1	2	0	0	0	0	115	0	29	0	124	24	53	0	0	0	16	0	17	0	73	0	0	2	0	0	0	0	0
OTU339571	8	2	0	0	0	8	0	27	0	3	0	0	0	1	12	1	1	1	0	0	6	67	12	3	23	5	0	6	0	9	0	0	0	82	51	60	14	10	0	7	0	1	0	2	0	0	0	195	1
OTUNew.ReferenceOTU142	11	27	8	10	22	32	5	22	12	12	3	7	3	11	12	2	6	1	7	4	8	18	4	26	13	5	21	14	102	1	75	1	26	8	39	15	97	4	21	0	1	0	7	6	0	0	1	5	1
OTU4378770	0	0	0	0	0	0	0	0	0	0	0	0	0	0	0	0	0	1	0	0	0	0	0	0	0	5	0	0	0	0	0	5	0	0	0	0	0	1	0	14	0	0	0	0	0	144	0	0	1
OTUNew.ReferenceOTU189	1	0	60	0	54	14	72	0	0	0	0	0	0	23	4	0	19	0	4	0	0	29	0	2	2	0	10	4	43	0	14	0	11	0	3	0	2	0	8	0	0	0	6	4	0	0	5	0	1
OTUNew.CleanUp.ReferenceOTU32	0	0	0	0	0	1	0	12	1	0	0	0	0	20	53	2	22	0	0	0	3	46	0	0	0	0	0	5	0	4	0	4	0	22	72	6	2	22	0	0	1	10	4	10	1	0	0	23	18
OTUNew.ReferenceOTU124	13	35	22	7	18	69	19	12	117	19	5	11	9	3	12	16	14	4	13	12	15	11	20	2	24	5	25	48	19	5	5	7	21	8	5	19	8	9	7	0	7	0	42	3	6	0	0	5	1
OTUNew.CleanUp.ReferenceOTU1452	3	9	0	13	0	0	0	11	0	3	0	4	0	2	3	6	2	15	0	12	2	2	6	0	5	13	0	6	0	4	0	13	0	4	3	4	0	7	0	12	0	17	4	19	0	34	2	16	2
OTU4479622	32	22	20	8	68	30	15	15	13	44	9	2	0	18	33	22	67	20	6	4	25	8	13	7	2	8	7	6	2	6	1	0	2	15	9	39	5	1	1	0	2	0	0	14	0	0	0	12	3
OTUNew.ReferenceOTU52	1	24	0	34	0	0	0	6	0	14	0	89	0	0	1	58	0	77	0	49	0	0	4	1	20	116	0	0	0	19	0	110	0	0	0	0	0	46	0	75	0	6	0	5	0	13	0	1	0
OTU234255	0	32	0	77	0	0	0	9	0	9	0	32	0	1	1	10	1	49	0	63	4	0	2	0	11	41	0	3	0	12	0	62	0	0	2	2	1	16	0	60	1	4	1	17	0	15	4	0	0
OTU20456	0	0	1	0	5	0	1	0	0	0	0	0	0	0	0	0	1	0	0	0	0	0	0	1	0	0	8	0	45	0	5	0	4	0	0	0	5	0	11	0	0	0	2	0	0	0	0	0	0
OTUNew.CleanUp.ReferenceOTU784	14	1	0	0	16	28	0	14	205	2	18	1	25	14	0	12	2	5	0	0	0	0	5	2	4	1	1	44	1	3	1	0	1	1	0	0	1	6	0	9	0	5	0	35	1	2	31	0	0
OTUNew.ReferenceOTU449	4	20	0	1	0	7	0	45	2	12	7	0	5	8	2	13	11	6	53	2	3	19	4	2	31	0	7	20	46	2	12	6	8	0	2	0	15	3	4	2	2	0	2	4	2	1	26	7	4
OTUNew.ReferenceOTU289	0	31	0	9	0	0	0	22	0	2	0	0	0	0	2	10	0	68	0	61	3	0	8	0	3	13	0	3	0	17	0	24	0	3	0	6	0	17	0	137	2	6	0	3	0	51	0	0	0
OTU4390305	0	0	0	0	0	349	146	45	152	0	0	0	0	10	4	1	31	0	0	0	0	0	0	0	2	0	0	0	0	0	0	0	0	1	0	0	0	0	0	0	0	0	0	0	0	0	0	8	0
OTU3394215	19	6	24	2	37	8	25	6	9	15	0	1	0	6	4	15	7	0	6	2	14	31	9	3	3	4	22	17	17	5	9	0	112	7	19	24	90	1	63	0	78	0	25	3	2	0	0	1	5
OTUNew.ReferenceOTU376	0	83	0	25	0	0	1	3	0	33	0	10	0	1	0	7	0	85	0	64	4	0	26	0	27	58	0	4	0	44	0	48	0	0	0	2	0	31	0	92	0	1	0	2	0	12	0	0	0
OTUNew.ReferenceOTU87	8	0	0	0	0	0	0	4	0	0	0	0	0	0	37	0	0	1	0	0	367	17	0	0	0	0	0	1	0	6	0	0	0	111	39	151	6	2	0	0	0	0	0	6	0	0	0	5	0
OTUNew.CleanUp.ReferenceOTU27	4	3	107	0	56	43	131	2	5	1	0	0	0	7	1	0	72	0	5	0	2	106	1	3	1	0	16	0	5	2	7	0	22	1	3	2	9	0	7	0	7	0	8	0	0	0	0	0	3
OTUNew.CleanUp.ReferenceOTU158	7	1	5	0	7	9	6	12	7	0	5	0	4	3	5	0	5	0	2	0	6	17	0	9	0	3	18	1	9	0	3	1	9	1	8	10	27	0	13	8	6	5	9	32	0	5	19	1	7
OTU4465304	10	13	0	39	0	25	0	49	73	6	30	8	19	7	27	50	8	41	0	23	6	0	70	0	71	26	0	21	0	17	0	44	0	3	1	9	0	16	0	2	0	0	0	0	0	1	0	0	0
OTU819561	0	0	0	0	0	0	0	0	0	0	0	0	0	0	0	0	0	0	0	0	0	0	0	0	0	0	0	0	1	0	4	0	0	0	0	0	0	3	0	0	0	4	0	22	0	0	12	0	1
OTUNew.CleanUp.ReferenceOTU66	47	17	0	0	0	13	2	44	10	0	0	0	0	8	110	6	5	0	0	0	40	7	14	6	1	0	0	14	1	7	0	3	0	45	24	201	4	25	0	0	0	0	5	10	1	0	0	21	2
OTUNew.ReferenceOTU321	27	6	0	0	0	0	0	36	1	0	5	0	0	36	41	1	24	0	2	0	9	5	6	1	4	0	0	2	2	12	0	0	0	0	0	0	11	11	0	0	0	4	18	101	2	0	12	78	16
OTUNew.ReferenceOTU172	14	16	0	5	0	29	5	31	12	6	2	2	16	5	5	5	2	7	2	12	14	0	31	0	22	13	0	12	7	3	2	0	3	9	6	6	10	13	1	8	0	5	35	14	0	19	59	0	3
OTU590430	0	13	0	161	0	0	0	0	0	72	0	321	0	0	0	0	0	18	0	142	0	0	0	0	3	20	0	0	0	0	0	0	0	0	0	0	0	0	0	8	0	0	0	0	0	0	0	0	0
OTUNew.CleanUp.ReferenceOTU1592	0	0	0	0	1	48	1	9	109	2	104	0	94	45	5	8	29	0	0	0	0	6	1	0	1	0	0	2	0	0	0	0	0	1	3	0	0	0	0	0	0	1	0	3	1	2	6	4	0
OTU323488	6	2	111	1	159	9	9	0	0	0	0	0	0	0	0	2	3	0	61	0	3	4	3	5	2	0	53	0	8	0	5	0	59	0	2	0	25	3	68	0	124	0	6	0	0	0	0	1	0
OTUNew.CleanUp.ReferenceOTU279	9	5	62	0	99	10	10	4	14	6	1	0	0	5	0	4	15	1	10	0	7	38	3	2	3	4	37	2	7	1	2	1	60	0	6	10	113	0	30	0	117	0	22	3	0	0	0	2	6
OTU1105428	4	3	0	0	0	3	0	8	0	2	1	1	1	0	3	4	0	8	0	0	3	2	2	1	2	2	0	0	0	6	0	6	0	0	2	3	0	11	0	8	1	6	3	24	0	5	11	9	2
OTU583925	0	0	66	0	121	17	55	0	0	0	0	0	0	0	0	0	4	0	6	0	0	44	0	6	0	0	50	0	2	0	46	0	78	0	13	2	11	0	29	0	37	0	3	0	0	0	0	0	1
OTUNew.CleanUp.ReferenceOTU502	3	38	0	18	0	0	0	18	0	6	0	16	0	0	3	14	0	57	0	29	21	1	14	0	17	45	0	6	0	17	0	32	0	2	2	14	0	35	0	51	0	9	1	36	0	18	0	6	0
OTU840347	3	5	0	2	0	0	0	15	0	0	0	0	0	0	0	0	0	20	2	11	0	0	26	1	14	3	0	7	0	4	0	21	0	0	1	0	0	14	0	8	0	3	1	7	1	3	6	9	4
OTU4333746	2	0	74	0	103	20	62	1	8	2	0	0	0	15	0	0	14	0	3	0	3	45	2	10	0	0	38	0	24	0	31	6	58	0	4	2	14	0	16	0	54	0	5	0	0	0	0	0	0
OTUNew.CleanUp.ReferenceOTU58	34	26	72	6	103	1	3	80	0	2	0	0	0	2	125	13	20	4	0	3	4	8	0	8	0	6	9	7	0	0	0	0	2	4	16	0	5	3	1	1	9	0	0	3	0	2	0	37	3
OTU814065	0	1	0	2	0	3	0	9	1	0	0	2	0	2	1	4	1	5	0	4	1	0	2	0	2	8	0	1	0	3	0	2	0	2	0	0	0	5	0	7	0	3	3	4	0	2	21	0	0
OTU538207	33	76	0	0	0	0	0	186	0	9	0	0	0	4	217	0	0	1	0	0	6	19	0	0	0	0	0	0	0	0	0	0	0	107	42	42	0	0	0	0	0	0	0	0	0	0	0	2	0
OTUNew.ReferenceOTU446	0	0	0	0	2	10	2	0	21	0	17	0	47	0	0	0	4	2	1	0	0	1	0	15	0	0	4	4	1	0	0	0	4	0	1	0	0	0	0	0	0	2	17	5	0	1	82	3	5
OTUNew.ReferenceOTU264	1	1	0	5	0	0	0	3	0	5	0	4	0	0	5	71	0	80	0	68	43	0	32	0	121	50	0	6	0	28	0	53	0	7	0	43	0	23	0	5	0	0	0	38	0	1	0	3	0
OTU554334	24	17	0	24	0	1	0	22	3	4	0	6	0	0	8	32	0	30	0	25	12	22	28	0	27	29	0	3	0	26	0	27	0	1	13	8	2	18	0	17	0	1	0	11	0	4	0	1	0
OTU830781	8	20	0	6	0	1	0	24	0	0	0	3	0	0	73	0	0	8	0	1	29	12	12	0	43	4	0	9	0	20	1	20	0	17	7	304	0	11	0	13	0	1	0	5	0	2	0	13	0
OTUNew.CleanUp.ReferenceOTU2845	43	9	5	9	13	23	2	42	6	5	2	11	4	11	10	18	22	28	7	15	30	7	45	3	24	29	15	9	12	34	6	10	6	19	12	62	8	14	6	14	7	0	3	6	0	11	1	2	1
OTUNew.CleanUp.ReferenceOTU25	3	0	98	0	145	13	138	0	0	1	0	2	9	0	0	0	0	0	15	0	0	15	0	3	0	0	63	0	13	0	20	0	10	0	3	1	8	0	8	0	64	0	2	0	0	0	0	2	1
OTU830526	0	0	0	0	0	0	0	2	0	0	0	3	0	4	0	7	1	27	0	0	0	0	2	0	0	30	1	4	0	3	0	11	0	0	0	0	0	5	0	30	0	2	0	0	0	32	2	0	0
OTUNew.ReferenceOTU584	0	5	0	11	0	0	0	11	3	10	49	0	81	0	0	3	0	12	0	5	0	0	8	2	45	6	4	11	0	76	0	129	0	0	0	3	0	14	0	8	1	0	2	4	0	1	2	0	0
OTU229501	5	3	1	1	0	0	22	22	0	3	0	0	0	4	0	21	2	2	0	0	0	27	8	6	0	2	0	0	8	8	0	3	0	0	11	0	6	26	1	1	0	3	5	149	0	1	0	9	4
OTU167947	7	93	0	60	0	0	0	30	0	36	0	90	0	0	2	35	0	57	0	44	0	0	12	0	7	63	0	0	0	4	0	119	0	0	0	0	0	15	0	37	0	1	0	0	0	0	0	2	0
OTU1683832	0	0	0	0	0	14	0	43	0	0	0	1	0	0	0	0	0	2	0	0	1	0	0	19	2	0	1	2	0	0	0	0	0	0	0	0	2	0	0	0	0	0	7	9	0	0	11	2	3
OTUNew.ReferenceOTU253	5	0	6	0	46	1	0	4	21	0	5	0	1	3	0	0	1	0	0	1	1	9	0	6	1	0	2	0	6	0	0	0	29	1	7	14	32	2	19	11	1	9	25	24	0	4	12	5	8
OTU694410	1	7	3	1	11	2	0	21	1	3	1	0	3	0	3	7	0	6	0	3	9	8	7	1	3	3	3	0	1	3	0	1	2	0	5	14	4	21	3	25	5	10	1	49	0	1	16	11	3
OTU573179	0	4	0	1	0	5	0	0	0	0	0	1	0	4	0	0	0	0	0	0	2	0	2	1	1	3	0	27	0	0	0	0	0	0	0	0	0	1	0	0	0	64	11	235	3	0	0	10	2
OTU1132546	0	0	0	0	0	0	1	0	0	0	0	0	0	0	0	0	0	0	0	0	0	1	0	0	2	0	0	7	0	0	3	0	0	1	0	0	2	2	2	0	0	2	24	0	1	0	0	25	17
OTU106539	0	0	0	0	0	0	0	0	3	0	0	0	11	0	0	0	0	0	0	0	0	0	33	0	18	2	0	2	0	0	0	6	0	0	0	1	0	5	0	2	0	3	0	0	0	7	0	26	0
OTU4324285	1	33	0	85	0	0	0	1	0	51	0	109	0	0	0	12	0	73	0	274	0	0	5	0	8	46	0	0	0	0	0	0	1	0	0	3	0	1	0	1	0	0	0	1	0	0	0	0	0
OTUNew.ReferenceOTU76	0	0	0	0	0	0	0	0	13	0	119	0	539	2	0	0	5	0	3	0	0	0	0	0	0	0	0	3	0	0	3	0	0	0	0	0	0	0	0	0	0	0	0	0	0	0	0	0	0
OTUNew.ReferenceOTU375	0	14	0	6	0	25	0	157	171	1	38	0	14	9	24	18	0	12	0	12	2	0	24	0	37	21	0	2	0	10	0	13	0	3	0	0	0	21	0	17	0	0	0	0	0	6	0	2	0
OTU566641	0	0	0	3	0	46	121	19	23	0	0	2	0	2	0	0	4	2	0	0	8	25	1	0	0	0	0	4	2	2	5	0	6	0	0	0	0	2	2	0	0	0	6	0	2	0	1	0	3
OTUNew.ReferenceOTU462	0	39	0	82	0	1	0	70	0	18	0	99	0	0	6	12	0	57	0	29	5	0	22	0	29	13	0	6	0	0	0	0	0	0	0	1	0	6	0	8	0	7	0	21	0	5	0	1	0
OTU230216	4	0	0	1	2	1	3	1	9	0	0	0	3	2	7	3	16	3	2	3	1	8	2	8	7	0	5	0	6	2	1	0	5	1	5	0	11	2	3	2	4	1	8	5	0	1	94	6	2
OTU241532	1	0	0	3	0	4	2	13	1	1	0	0	0	2	0	0	7	2	0	0	0	1	10	0	0	1	0	0	1	4	0	27	0	0	0	0	3	12	0	23	0	2	2	4	0	5	0	24	0
OTU1126	0	84	0	191	0	0	0	0	0	27	0	233	0	0	0	0	0	16	0	107	0	0	0	0	0	35	0	0	0	0	0	1	0	0	0	0	0	0	0	3	0	0	0	0	0	0	0	0	0
OTU41135	0	9	0	1	0	0	0	0	0	2	0	0	0	4	0	0	0	0	0	0	1	2	2	0	0	1	0	1	3	2	0	0	0	0	17	1	0	0	0	1	0	0	0	0	0	1	0	4	0
OTUNew.ReferenceOTU420	6	0	0	0	0	0	0	0	0	0	0	0	0	5	0	0	14	0	4	0	1	70	0	40	0	0	0	28	0	0	0	0	0	4	35	7	28	0	0	0	1	1	7	0	4	0	0	19	32
OTUNew.CleanUp.ReferenceOTU38	7	16	21	2	10	58	72	11	21	17	1	17	0	4	6	3	33	1	1	1	14	19	14	3	18	1	35	17	7	2	6	0	13	8	1	8	15	0	11	1	41	0	4	0	1	0	0	7	0
OTUNew.CleanUp.ReferenceOTU100	0	1	0	1	0	4	0	0	0	0	0	0	0	1	0	0	4	1	1	0	0	25	0	0	0	0	0	0	0	0	0	0	0	23	26	0	0	0	0	1	0	3	0	0	0	7	0	0	1
OTU811943	1	48	0	0	0	3	0	17	0	17	1	0	0	3	68	12	0	33	0	23	22	9	8	11	72	31	0	34	0	16	0	32	0	12	13	21	3	31	0	0	0	7	0	15	0	0	0	87	1
OTUNew.ReferenceOTU452	1	0	0	0	3	7	2	0	0	0	2	0	0	2	2	2	6	3	34	0	0	0	0	19	3	1	7	0	12	0	5	0	0	0	0	0	4	0	0	2	7	0	4	8	0	0	15	13	3
OTU105649	0	1	0	0	0	0	0	55	0	0	0	0	0	1	6	7	0	0	0	0	27	2	15	0	8	3	0	3	0	12	0	0	0	11	0	0	0	8	0	56	0	16	0	28	0	31	0	0	0
OTU3883854	2	0	19	0	63	10	40	0	14	0	2	0	4	2	0	1	2	0	0	0	1	17	0	14	0	0	10	3	22	0	5	0	66	0	34	4	68	2	112	0	89	0	9	0	0	0	0	2	13
OTUNew.CleanUp.ReferenceOTU36	2	2	0	6	0	1	0	25	0	5	0	2	0	0	0	41	0	34	0	30	38	0	48	0	23	74	0	4	0	9	0	8	0	8	0	28	0	18	0	27	0	1	0	7	0	10	0	0	0
OTU632133	2	0	2	0	2	5	1	0	6	0	12	1	13	23	11	0	35	0	4	0	0	23	0	11	1	0	5	3	9	1	12	0	16	0	26	1	19	0	17	0	3	1	22	2	1	0	72	1	8
OTU825733	0	57	0	42	0	0	0	0	0	29	0	11	0	0	0	20	0	60	0	92	0	0	2	0	7	48	0	6	0	14	0	48	0	0	0	0	0	12	0	126	0	0	0	0	0	24	0	0	0
OTU4160085	13	8	8	1	37	16	9	33	8	0	4	0	0	2	20	2	4	0	20	4	10	3	8	17	3	4	14	8	3	0	2	0	1	1	15	7	4	1	5	4	3	2	13	7	0	3	42	6	3
OTU325735	1	4	0	7	1	13	6	5	39	10	1	0	2	14	10	0	4	11	0	13	1	29	0	1	7	2	0	18	45	1	3	20	0	4	45	2	7	0	7	6	0	3	40	8	4	4	11	1	11
OTU109247	0	0	0	0	0	7	306	0	0	0	1	0	1	23	5	0	2	0	0	0	0	21	0	0	0	0	0	0	6	0	0	0	0	0	13	0	0	0	0	0	0	1	24	0	0	0	50	1	6
OTU562753	4	1	0	0	0	0	0	14	2	0	0	0	0	2	22	0	0	0	0	0	352	0	10	0	0	0	0	1	0	0	0	0	0	158	38	55	1	4	0	1	0	1	0	0	0	0	0	6	0
OTU2579595	1	65	0	11	0	0	0	48	0	1	0	16	0	0	0	12	0	39	0	40	1	0	16	0	5	35	0	4	0	54	0	44	0	1	0	0	0	76	0	107	0	2	0	2	0	15	0	0	0
OTUNew.ReferenceOTU119	4	49	0	5	0	0	0	57	0	12	0	15	0	7	0	11	4	75	0	19	2	11	27	3	70	22	0	14	0	21	0	38	0	9	30	0	0	16	0	54	0	2	1	10	0	18	0	8	0
OTU677903	0	1	1	0	0	3	2	2	1	0	0	0	5	0	5	2	6	6	0	10	1	2	2	15	2	3	0	1	1	1	3	9	0	0	2	0	2	6	1	0	1	2	1	6	0	1	46	5	4
OTUNew.ReferenceOTU149	6	21	0	3	0	44	0	13	3	11	0	1	0	3	4	10	0	2	0	5	3	0	5	0	11	16	0	2	0	9	0	16	5	0	1	0	0	6	0	14	0	9	1	10	0	25	48	0	0
OTU639847	1	0	3	0	0	16	175	10	8	0	0	0	0	4	6	4	6	0	0	0	6	143	0	9	0	0	0	10	8	0	7	0	1	4	7	1	1	0	14	0	0	0	1	0	0	0	0	3	0
OTUNew.CleanUp.ReferenceOTU59	1	1	0	1	0	1	0	9	5	0	0	0	0	2	14	21	4	18	0	8	12	8	62	0	23	6	0	20	0	10	0	26	0	0	0	3	0	10	0	9	2	0	1	0	0	3	0	0	0
OTUNew.ReferenceOTU505	0	0	2	0	4	2	2	1	14	0	20	0	36	1	0	0	0	0	0	0	3	0	3	1	0	0	14	2	0	0	0	0	6	0	1	0	10	10	1	3	1	3	4	14	0	1	36	1	6
OTUNew.ReferenceOTU331	15	4	8	7	1	25	8	17	35	2	33	0	37	17	2	16	26	5	33	1	13	32	10	11	72	6	16	19	31	2	27	0	21	6	41	23	7	1	3	0	1	0	0	2	0	0	0	1	0
OTU317554	2	1	1	0	4	0	0	15	2	1	1	0	2	0	0	0	0	1	0	0	0	12	1	1	0	6	1	0	0	1	0	0	7	2	2	1	10	0	1	15	2	0	4	8	0	3	47	6	3
OTU554945	0	40	0	184	0	0	0	0	0	29	0	166	0	0	1	4	0	67	0	131	0	1	0	0	1	36	1	0	0	0	0	0	0	0	0	0	0	0	0	2	0	0	0	0	0	0	0	0	0
OTU4373778	0	0	0	0	0	4	0	0	10	0	2	0	1	0	0	0	0	0	5	0	0	0	0	33	0	0	12	0	1	0	0	0	1	0	0	0	0	0	0	0	0	0	3	0	0	0	15	1	1
OTU2222982	4	8	0	5	9	74	1	14	86	22	24	4	11	17	19	34	11	9	28	11	32	16	27	3	20	4	2	31	6	1	1	0	1	6	0	6	3	1	4	0	2	0	14	4	2	0	7	4	3
OTUNew.CleanUp.ReferenceOTU30	0	0	0	0	0	0	0	0	0	0	0	0	0	1	0	0	21	2	19	0	4	92	0	16	0	0	31	16	18	0	19	0	17	1	56	3	146	3	104	0	5	0	64	1	1	0	0	6	15
OTUNew.CleanUp.ReferenceOTU46	0	0	0	0	0	0	0	0	0	0	0	0	0	0	0	0	0	0	0	0	0	0	0	0	0	0	0	0	0	0	0	0	1	0	0	0	0	0	0	0	0	1	0	0	0	0	34	0	2
OTU581312	0	20	0	29	0	0	0	23	0	13	0	21	0	0	0	9	0	66	0	38	3	0	14	0	40	103	0	19	0	48	0	4	0	1	0	4	0	9	0	35	0	0	0	8	0	19	0	2	0
OTU1138828	2	0	3	0	0	6	116	2	1	0	0	0	0	0	0	0	0	0	1	0	0	35	0	5	0	1	3	18	7	0	29	0	26	0	11	1	66	0	112	0	143	0	34	0	0	0	0	0	2
OTU276755	19	17	0	8	1	133	20	30	9	2	4	1	13	19	10	8	8	12	8	3	26	19	8	29	86	13	2	1	9	6	0	3	0	21	10	10	15	0	4	1	0	0	0	6	0	0	0	25	3
OTUNew.ReferenceOTU297	5	0	1	0	0	2	0	0	0	0	0	0	4	1	0	0	1	4	2	0	3	1	0	6	0	0	4	0	1	0	0	1	4	0	0	0	14	0	1	0	5	2	4	6	0	1	28	3	5
OTUNew.ReferenceOTU552	0	0	0	0	0	0	0	0	0	0	0	14	0	0	0	3	0	1	0	0	0	0	0	0	1	5	0	2	0	1	0	0	1	0	0	1	0	15	0	22	0	11	0	14	0	20	4	8	0
OTU891587	18	12	0	10	0	0	0	74	0	9	0	0	0	8	91	0	0	4	0	3	81	37	4	0	3	0	0	0	0	0	0	0	0	135	47	98	2	0	0	0	0	0	0	0	0	0	0	10	0
OTUNew.CleanUp.ReferenceOTU35	8	7	0	2	0	0	0	48	0	1	0	0	0	0	103	0	0	0	0	0	64	44	2	0	10	0	0	0	0	0	0	0	0	114	71	141	1	4	0	0	0	1	0	0	0	0	0	19	0
OTU837566	2	2	0	1	0	29	0	10	3	10	1	0	2	1	0	1	4	0	0	1	0	0	3	0	10	5	0	3	2	1	0	0	0	0	0	0	1	0	0	2	0	1	3	2	0	13	47	0	0
OTU467626	13	12	0	0	3	13	2	13	356	2	35	2	87	3	7	0	2	1	0	2	3	0	14	3	6	2	0	13	0	3	0	19	0	3	1	8	2	3	0	1	0	0	0	1	0	0	0	0	0
OTU571293	4	2	0	1	0	15	0	114	0	1	1	0	0	0	11	22	0	9	0	0	59	5	108	0	53	3	0	25	0	7	0	4	0	16	5	51	2	17	0	1	0	0	0	1	0	0	0	15	0
OTU2651002	2	4	0	2	0	0	0	0	0	0	0	0	0	0	0	0	0	0	0	0	0	0	0	0	0	0	0	0	1	0	1	0	0	0	0	0	0	0	0	0	0	0	0	0	0	0	0	0	0
OTUNew.ReferenceOTU525	7	6	20	4	47	19	16	16	13	9	10	4	0	7	5	10	10	8	3	2	19	26	16	4	10	7	34	4	17	0	12	4	70	6	5	25	46	2	14	0	56	1	9	2	0	0	0	8	0
OTUNew.CleanUp.ReferenceOTU294	13	13	0	8	0	2	0	64	0	8	0	7	0	0	4	1	0	10	0	3	14	3	4	0	4	11	0	0	0	10	0	7	0	2	6	10	0	21	0	87	0	16	0	67	0	19	0	2	0
OTU832243	0	59	0	261	0	0	0	0	0	12	0	148	0	0	0	3	1	18	0	50	0	0	1	0	0	63	0	0	0	0	0	0	1	1	0	0	0	0	0	15	0	0	0	0	0	0	0	0	0
OTU234053	2	9	0	1	0	0	3	0	0	0	0	0	0	0	0	0	0	0	0	0	0	0	0	0	1	0	0	2	2	0	1	0	0	0	0	0	3	0	0	0	0	0	0	0	0	0	0	0	0
OTU244523	22	32	0	7	0	1	0	24	0	12	0	29	0	0	19	16	0	42	0	19	18	13	46	0	27	43	0	4	0	43	0	25	0	27	5	59	0	22	0	14	0	3	0	1	0	9	0	1	0
OTUNew.CleanUp.ReferenceOTU99	0	45	0	49	0	0	0	8	49	29	25	3	33	12	0	29	3	11	0	15	7	3	13	7	24	19	3	1	0	41	0	53	0	0	0	0	0	6	0	18	0	0	0	0	0	0	0	0	0
OTU1109461	2	0	9	0	14	54	160	8	2	0	4	2	6	151	5	4	69	1	4	0	9	76	6	1	0	0	0	7	2	0	0	0	0	0	15	0	5	0	4	0	0	0	1	0	0	0	0	0	0
OTU4302982	1	11	0	8	0	2	0	5	35	6	20	36	19	2	3	13	0	35	0	14	12	0	30	1	69	23	0	11	1	28	0	73	0	1	4	31	0	20	0	11	0	1	0	8	0	2	0	5	0
OTUNew.ReferenceOTU125	6	19	16	0	12	6	43	2	5	0	0	0	0	0	0	0	1	0	24	0	7	12	4	2	0	0	64	17	22	0	16	3	38	4	1	26	38	5	80	0	23	1	108	1	1	0	0	4	5
OTU277092	2	0	27	0	38	19	17	0	15	0	3	0	7	7	7	0	11	0	21	0	0	48	0	61	0	0	18	9	18	1	10	1	26	4	20	0	40	0	61	0	6	0	43	0	0	0	9	8	26
OTUNew.CleanUp.ReferenceOTU149	2	1	0	1	0	0	0	7	0	5	0	6	0	0	3	19	0	56	0	56	0	2	10	0	7	20	0	4	0	10	0	12	1	0	1	0	0	10	0	49	0	6	0	5	0	30	13	1	0
OTUNew.CleanUp.ReferenceOTU2251	24	18	0	12	0	4	0	101	0	11	0	5	0	3	3	23	0	58	0	35	10	1	23	0	26	21	0	3	0	21	0	30	0	5	1	11	0	15	0	57	0	3	0	6	0	5	0	0	0
OTUNew.CleanUp.ReferenceOTU369	2	3	37	2	47	2	5	3	3	6	2	1	1	1	5	1	3	1	15	1	22	22	7	11	1	0	104	0	10	0	5	0	29	1	9	5	50	0	19	0	44	1	15	0	0	0	1	0	9
OTU2134035	2	0	0	0	0	29	0	8	3	0	0	1	0	2	43	1	0	7	2	0	3	1	4	6	8	0	2	1	0	8	0	0	0	3	0	3	0	33	0	14	0	2	1	12	0	0	1	1	0
OTU540578	2	18	0	22	0	0	0	1	0	3	0	82	0	4	11	0	0	3	0	3	47	0	4	0	0	0	0	0	0	0	0	2	0	24	1	360	0	0	0	0	0	1	0	3	0	0	0	1	0
OTUNew.CleanUp.ReferenceOTU240	9	16	0	68	0	1	0	19	0	14	0	21	0	1	12	2	1	36	0	32	9	6	12	0	21	17	0	6	0	16	0	31	0	2	3	22	0	11	0	27	0	2	0	2	0	8	0	5	0
OTUNew.CleanUp.ReferenceOTU1507	0	0	10	0	25	2	23	0	0	1	1	0	0	6	0	0	16	2	63	0	0	24	0	18	0	0	8	0	4	0	2	0	0	0	1	0	6	2	2	0	10	6	16	74	0	0	26	42	4
OTUNew.ReferenceOTU528	0	0	0	0	0	2	0	0	0	0	0	0	0	3	0	0	6	0	0	0	0	0	0	7	0	0	0	0	559	0	0	0	0	1	34	0	0	0	0	0	0	0	0	0	0	0	0	0	1
OTUNew.CleanUp.ReferenceOTU82	0	48	0	87	0	0	0	2	0	35	0	159	0	0	0	0	0	88	0	118	0	0	5	0	0	56	1	0	0	0	0	8	0	0	0	0	0	0	0	3	0	0	0	0	0	0	0	0	0
OTU796938	2	1	11	0	1	6	3	3	12	0	0	0	0	6	12	8	20	10	1	3	2	13	8	1	7	14	4	0	1	2	0	8	6	3	12	3	3	12	7	14	0	2	3	23	0	4	11	10	1
OTUNew.ReferenceOTU74	1	0	0	0	0	0	0	1	0	0	0	0	0	0	0	0	0	0	0	0	0	0	0	0	0	0	0	0	0	0	0	0	0	0	0	0	3	0	0	0	2	1	12	14	0	0	18	5	0
OTUNew.ReferenceOTU434	3	25	0	30	0	0	0	21	0	12	0	28	0	0	0	5	0	30	0	40	3	0	27	0	53	6	0	24	0	15	0	44	0	0	0	0	0	50	0	78	0	1	0	2	0	10	0	0	0
OTUNew.CleanUp.ReferenceOTU72	0	0	0	0	0	23	57	0	0	0	0	0	0	25	4	0	24	0	0	0	2	155	0	43	0	0	0	7	3	0	11	0	2	1	93	0	19	0	24	0	2	0	84	6	3	0	0	2	16
OTU818655	6	12	15	1	32	60	43	8	55	4	14	0	8	27	5	25	14	2	14	0	17	16	11	11	5	6	24	13	3	7	14	0	7	8	1	3	15	3	27	0	26	0	13	0	0	0	0	10	1
OTU1645783	1	0	1	0	5	2	18	0	0	0	0	0	0	0	0	0	0	0	0	0	0	8	0	0	0	0	0	3	0	0	0	0	0	0	0	0	12	0	2	0	0	0	2	0	0	0	0	0	4
OTU839436	1	31	0	123	0	0	0	8	0	17	0	236	0	0	2	2	0	3	0	79	0	0	3	0	2	12	0	1	0	1	0	1	0	1	3	1	2	9	0	14	0	1	0	4	0	3	2	4	0
OTU137410	0	28	0	103	0	0	0	6	1	36	0	156	0	0	0	2	0	30	0	205	0	0	0	0	0	26	0	0	0	0	0	0	0	0	0	0	0	5	1	0	0	0	0	1	0	0	0	0	0
OTU4471478	10	18	0	7	0	0	0	4	0	8	0	0	0	0	1	14	0	17	0	31	0	0	3	0	0	15	0	0	0	14	0	3	0	0	2	0	0	9	0	2	0	1	0	1	0	6	0	0	0
OTU229373	6	14	0	2	0	0	0	144	0	7	0	33	0	0	2	8	0	3	0	2	0	3	25	1	10	0	0	0	2	1	0	11	0	0	5	0	0	11	2	0	0	0	1	19	0	0	0	0	3
OTU30068	1	52	0	16	0	0	0	6	0	30	0	4	0	0	2	87	0	113	0	68	0	0	65	0	16	39	0	12	0	9	0	0	0	0	0	0	0	1	0	12	0	1	0	0	0	4	0	0	0
OTUNew.CleanUp.ReferenceOTU52	0	0	0	0	0	0	0	0	0	0	0	0	0	0	0	0	0	0	0	0	0	0	0	0	0	0	0	11	9	0	10	0	89	0	0	0	0	0	6	0	32	3	76	5	2	0	0	51	300
OTU342904	0	0	0	0	0	0	1	0	0	0	0	0	0	0	0	0	0	0	0	0	0	0	0	0	0	0	0	2	0	0	0	0	0	0	0	0	6	0	0	0	0	0	0	0	0	0	0	0	0
OTU315805	0	0	0	0	0	1	0	0	0	0	0	0	0	0	0	0	0	0	0	0	0	0	0	2	0	0	0	4	12	0	0	0	0	0	0	0	26	0	21	0	0	0	3	0	0	0	0	0	3
OTU836885	5	20	0	33	0	0	0	13	0	7	0	55	0	0	5	51	3	42	0	73	10	6	29	0	13	45	0	5	0	48	0	15	0	19	10	6	2	31	0	7	0	0	0	0	0	0	0	0	0
OTU217623	2	0	0	0	0	40	12	67	62	3	169	1	94	3	2	4	0	0	2	4	24	2	5	14	3	0	0	5	15	0	2	6	0	5	0	2	0	1	1	0	0	0	1	2	0	0	0	2	2
OTU848259	0	0	0	2	0	0	1	0	0	0	0	0	0	0	0	0	0	0	0	0	0	0	0	0	0	1	0	0	2	0	0	0	2	0	0	0	21	0	1	0	0	0	0	0	0	0	0	0	5
OTUNew.CleanUp.ReferenceOTU37	2	36	0	7	1	0	0	89	0	6	0	1	0	0	18	15	0	40	0	68	2	6	32	0	36	11	0	0	0	19	1	48	0	0	0	2	0	14	0	111	0	0	0	2	0	5	0	5	0
OTUNew.ReferenceOTU560	10	68	0	4	0	0	0	3	0	4	0	5	0	0	0	18	0	23	0	28	4	0	8	0	2	18	0	0	0	25	0	37	0	0	0	0	0	35	0	87	0	1	0	2	0	43	0	0	0
OTUNew.ReferenceOTU153	0	0	0	0	0	0	0	0	0	0	0	0	0	0	0	0	1	0	0	0	0	0	0	0	0	0	0	0	0	0	0	0	0	0	1	0	1	0	0	0	0	0	1	0	0	0	20	0	1
OTU2138725	0	29	0	6	0	15	0	46	2	0	0	0	0	8	7	0	0	11	1	4	0	5	0	0	3	2	0	3	1	2	0	1	0	2	0	0	0	7	0	5	0	32	1	185	0	7	1	0	0
OTUNew.CleanUp.ReferenceOTU34	0	0	28	0	20	12	30	2	0	0	2	0	0	24	0	5	21	0	20	0	2	28	1	12	2	0	65	1	34	0	18	0	30	0	26	0	26	0	37	0	33	0	1	1	0	0	0	0	4
OTU589767	1	52	0	15	0	0	0	46	0	1	0	17	0	0	4	67	0	36	0	32	10	0	76	0	45	34	0	8	0	6	0	0	0	3	0	0	0	5	0	0	0	2	0	1	0	0	0	3	0
OTUNew.CleanUp.ReferenceOTU76	0	0	6	0	20	3	20	0	0	0	0	0	0	0	0	0	0	0	1	0	0	28	0	0	0	0	20	2	6	0	0	0	75	0	13	0	114	0	91	0	99	0	9	0	0	0	0	0	12
OTU3950299	17	12	0	6	0	8	0	26	3	43	1	13	3	2	42	53	5	9	0	9	7	6	46	0	46	17	0	7	0	11	0	39	0	6	1	29	7	20	2	3	0	1	0	11	0	1	0	7	0
OTU159828	0	12	0	1	0	0	0	2	0	3	0	65	0	0	0	13	0	2	0	3	3	1	1	0	9	25	0	4	0	9	0	2	0	0	0	0	0	3	0	62	0	0	0	0	0	60	0	0	0
OTU540846	6	0	0	3	0	0	0	1	0	11	0	0	0	0	56	0	0	0	0	0	146	2	2	1	4	0	0	0	0	2	0	10	0	47	10	235	5	14	0	1	0	0	0	0	0	0	0	1	0
OTUNew.ReferenceOTU298	0	11	0	16	0	0	0	3	0	20	0	10	0	0	0	1	0	14	0	52	0	0	0	0	0	24	0	0	0	17	0	116	0	0	0	0	0	6	0	20	0	3	0	0	0	6	1	0	0
OTUNew.ReferenceOTU435	6	0	127	0	117	14	34	4	7	5	8	0	11	41	4	0	36	0	7	3	0	13	0	0	0	0	28	0	0	0	5	7	7	0	0	0	2	0	1	0	0	0	0	0	0	0	0	0	0
OTUNew.ReferenceOTU104	1	69	0	26	0	0	0	0	0	52	0	3	0	0	0	102	0	27	0	5	2	0	27	0	16	23	0	1	0	21	0	16	0	0	0	2	0	9	0	12	0	1	0	5	0	8	0	0	0
OTUNew.ReferenceOTU257	149	48	0	8	0	2	0	175	0	11	0	0	0	5	37	0	0	0	0	0	7	8	1	4	0	0	0	0	0	0	0	0	0	13	26	1	6	0	0	0	0	0	0	2	0	0	0	68	2
OTUNew.ReferenceOTU207	4	18	4	6	6	13	16	7	1	35	4	5	0	12	8	58	27	20	3	6	29	18	44	8	22	21	7	12	7	6	8	3	10	9	18	24	11	5	9	0	3	0	8	1	1	2	0	9	1
OTUNew.CleanUp.ReferenceOTU42	1	17	0	17	0	1	0	48	4	35	5	4	31	1	4	45	0	21	2	16	1	0	49	2	31	15	0	6	0	24	0	95	0	0	0	3	0	18	0	7	0	0	1	8	0	0	0	1	0
OTUNew.ReferenceOTU372	24	1	31	0	156	1	12	19	1	0	4	3	4	9	8	0	8	4	10	0	2	49	2	1	2	2	14	0	0	0	1	0	0	0	0	0	0	0	0	0	0	0	0	0	0	0	0	0	0
OTU60649	4	67	0	108	0	1	0	25	0	54	0	154	0	0	1	8	0	30	0	90	0	0	2	0	0	15	0	0	0	1	0	3	0	0	0	1	0	2	0	3	0	0	0	0	0	0	0	1	0
OTUNew.CleanUp.ReferenceOTU45	58	26	0	14	0	3	0	185	44	22	8	3	2	7	9	6	4	6	0	0	3	0	28	0	10	7	0	4	0	12	0	10	0	0	0	8	0	9	0	11	0	1	1	2	0	4	2	2	0
OTUNew.ReferenceOTU190	0	0	0	0	0	0	0	0	0	0	0	0	0	0	0	0	0	0	0	0	0	0	0	0	0	0	0	0	1	0	0	0	0	0	0	0	0	0	0	0	0	0	0	0	0	0	0	0	0
OTUNew.CleanUp.ReferenceOTU40	1	0	57	0	84	0	5	0	0	0	0	1	0	2	0	0	4	3	13	0	0	17	0	3	0	1	58	1	15	0	20	2	21	0	0	1	47	0	61	0	31	0	3	0	0	0	0	0	0
OTUNew.ReferenceOTU102	2	97	0	122	0	0	0	0	0	33	0	68	0	0	1	16	0	42	0	81	0	0	1	0	1	37	0	0	0	2	0	17	1	0	0	1	0	4	0	20	0	0	0	0	0	2	0	0	0
OTUNew.ReferenceOTU605	0	0	29	0	81	1	0	0	3	0	5	0	13	2	0	0	0	0	3	0	2	18	0	4	0	0	22	1	8	0	5	0	39	0	10	2	92	0	53	0	61	0	10	3	0	0	15	1	2
OTU145162	0	57	0	148	0	0	0	0	0	51	0	172	0	0	0	0	0	14	0	91	0	0	1	0	5	24	0	0	0	1	0	0	0	0	0	0	0	0	0	0	0	0	0	0	0	0	0	0	0
OTU276208	0	0	24	3	62	10	16	0	11	1	6	0	35	3	0	0	3	0	31	0	0	9	1	44	0	0	30	0	22	0	12	0	14	1	11	2	11	0	6	0	0	0	1	0	0	0	0	0	1
OTUNew.CleanUp.ReferenceOTU1180	2	2	0	0	0	19	2	7	101	0	23	0	15	0	1	0	3	0	2	0	1	2	1	2	0	1	1	0	2	0	0	1	1	1	0	3	0	0	0	7	1	0	6	2	1	0	15	0	0
OTU4441050	121	157	0	100	0	3	11	5	5	26	9	7	4	71	3	0	9	0	0	0	0	18	0	0	0	0	0	0	0	0	0	0	0	0	0	0	0	0	0	0	0	0	0	0	0	0	0	0	0
OTU1127721	0	44	0	139	0	0	0	0	0	54	0	83	0	0	0	6	0	30	0	96	0	0	0	1	0	41	0	0	0	0	0	23	0	0	1	0	0	1	0	12	0	2	0	3	0	4	0	0	0
OTU320797	2	0	0	0	2	8	29	0	0	0	0	0	0	0	0	0	0	0	0	0	0	18	0	6	0	0	1	1	6	0	4	0	5	0	0	0	18	0	12	0	10	0	5	0	0	0	0	0	0
OTUNew.CleanUp.ReferenceOTU113	0	0	0	0	0	0	5	1	4	0	3	0	22	50	6	1	161	0	13	0	7	136	11	7	0	0	0	7	4	0	0	0	2	0	16	0	7	0	2	4	0	0	18	0	3	1	0	1	3
OTU810882	0	0	0	0	0	0	3	0	0	0	0	0	0	0	0	0	0	0	0	0	0	0	0	0	0	0	0	0	0	0	0	0	0	0	0	0	3	0	0	0	0	0	3	0	0	0	0	0	0
OTU4472929	1	109	0	17	0	0	0	80	0	14	0	40	0	0	4	14	0	4	0	4	8	2	9	0	16	8	0	6	0	40	0	0	0	5	9	5	0	32	0	1	0	1	0	10	0	0	0	8	0
OTU354863	0	47	0	32	0	0	0	10	1	9	0	18	0	8	0	37	9	51	0	30	3	0	30	0	13	23	0	6	0	11	0	18	0	4	0	4	0	14	0	11	0	4	0	19	0	17	0	0	0
OTUNew.ReferenceOTU414	12	4	70	2	90	2	19	1	0	8	1	0	0	30	0	0	16	0	6	1	0	13	4	4	1	0	39	0	13	0	7	0	17	1	6	0	10	1	3	0	5	0	3	0	0	0	0	0	1
OTUNew.CleanUp.ReferenceOTU81	0	0	16	0	79	0	6	0	5	0	1	0	0	2	0	0	3	0	0	0	0	17	0	3	0	0	32	0	14	0	8	0	70	0	16	2	56	0	47	0	108	0	3	0	0	0	0	0	3
OTU549977	7	34	0	14	0	0	0	35	0	33	0	2	0	1	4	13	0	34	0	29	0	0	12	0	7	10	0	0	0	3	0	8	0	0	0	0	3	18	0	14	0	1	1	4	0	0	4	0	1
OTUNew.CleanUp.ReferenceOTU56	0	1	0	0	0	1	1	0	2	0	0	0	0	0	0	0	1	0	0	0	0	1	0	1	0	0	1	2	3	0	0	0	3	0	0	0	0	0	3	0	1	0	0	0	0	0	0	0	0
OTU581541	0	0	0	0	0	0	1	0	0	0	0	0	0	0	0	0	0	0	0	0	0	0	0	0	0	0	0	0	0	0	0	0	0	0	0	0	3	0	0	0	0	0	0	0	0	0	0	0	0
OTU245163	3	16	0	7	0	0	0	17	0	5	0	18	0	0	0	2	0	13	0	12	24	1	35	0	26	48	0	11	0	14	0	4	0	2	0	22	0	40	0	6	0	9	0	11	0	13	2	5	0
OTUNew.ReferenceOTU307	14	0	1	0	6	29	1	24	1	0	1	0	2	13	20	14	25	0	3	0	8	61	28	6	47	0	13	3	18	18	24	0	0	11	9	50	9	2	0	0	0	0	1	7	0	0	0	11	2
OTU587162	13	20	0	11	0	2	0	104	0	2	0	0	0	0	0	10	0	24	0	7	2	0	16	0	33	12	0	2	0	13	0	1	0	0	0	0	8	28	0	32	0	2	6	23	0	2	1	7	1
OTU567718	1	0	2	0	0	7	43	3	1	0	0	0	0	5	0	4	0	6	2	3	0	1	3	1	10	9	0	0	1	0	0	21	0	0	0	0	4	10	0	2	0	1	2	29	0	0	0	2	1
OTU585674	12	9	0	6	0	29	8	35	13	0	5	3	14	11	35	8	2	7	0	5	6	2	16	0	14	3	0	31	5	1	0	7	0	14	2	24	2	31	0	18	0	1	2	17	10	3	0	1	1
OTUNew.ReferenceOTU361	0	18	0	167	0	0	0	0	0	13	0	187	0	0	0	0	0	14	0	111	0	0	0	0	0	31	0	0	0	0	0	0	0	0	0	0	0	0	0	0	0	0	0	0	0	0	0	0	0
OTU352392	0	197	3	17	5	0	0	0	0	0	0	0	0	8	11	9	17	19	0	17	0	0	0	0	0	7	0	0	0	11	2	64	0	0	0	4	1	5	3	21	3	0	0	0	0	0	0	0	1
OTU4479504	0	0	0	0	0	0	0	0	0	0	0	0	0	0	0	2	0	0	0	0	0	0	1	0	0	2	0	0	0	0	0	0	0	0	0	0	0	0	0	9	0	1	0	0	0	11	0	0	0
OTUNew.CleanUp.ReferenceOTU119	0	0	0	0	0	10	0	1	21	0	0	0	0	4	0	2	0	0	0	0	2	0	3	1	5	3	0	9	5	5	0	19	0	0	1	0	1	12	0	6	0	7	22	29	0	7	6	0	3
OTU319461	0	0	4	2	12	2	30	0	0	0	0	0	0	0	0	0	5	0	0	0	0	34	0	13	0	0	1	0	28	0	40	0	45	0	23	0	12	0	17	1	20	0	5	0	0	0	0	0	12
OTUNew.ReferenceOTU80	0	3	0	2	0	2	0	7	0	0	0	0	0	0	0	0	0	0	0	3	0	0	0	0	0	2	0	0	0	3	0	0	2	0	0	1	0	2	0	104	0	4	0	2	0	16	0	0	0
OTU444025	3	3	51	2	69	1	3	10	2	1	0	0	0	0	3	0	8	2	7	0	8	4	3	3	2	2	46	1	13	2	22	0	22	3	16	5	7	2	14	0	89	0	7	0	0	0	0	0	0
OTU571777	0	1	0	2	0	1	0	11	0	0	0	0	0	0	0	0	0	0	0	0	0	0	0	0	0	1	0	0	0	0	0	0	0	0	0	0	0	2	0	0	0	6	0	4	0	0	3	0	0
OTU233950	6	14	0	28	0	0	0	27	3	5	0	57	0	0	4	27	0	17	0	15	0	0	7	0	4	28	0	3	0	7	0	23	0	3	0	1	0	3	0	22	0	0	0	4	0	8	0	2	0
OTU91513	3	1	6	0	10	17	9	10	6	2	2	0	0	35	30	0	34	0	0	0	2	78	0	50	0	0	3	1	16	0	8	0	16	4	44	1	10	0	9	0	20	1	13	6	0	0	25	4	5
OTUNew.ReferenceOTU203	1	0	0	0	0	16	5	2	4	0	0	0	0	0	0	0	4	0	0	0	0	14	0	33	0	0	0	5	14	0	5	0	3	0	10	0	68	0	35	0	0	0	82	3	4	0	0	0	68
OTU791761	0	3	0	2	0	1	1	2	0	0	0	0	3	2	3	3	7	3	4	0	2	4	0	12	5	2	2	1	1	2	0	2	0	1	3	1	2	0	0	3	0	1	6	6	0	1	16	8	1
OTUNew.CleanUp.ReferenceOTU47	2	0	0	0	0	60	18	61	43	0	54	0	108	61	49	8	42	0	0	0	1	26	0	0	0	0	0	0	0	0	0	0	0	0	0	0	0	0	0	0	0	0	0	0	0	0	0	0	0
OTU141161	0	0	2	3	4	3	51	3	1	0	0	0	0	18	3	4	17	2	4	0	1	58	17	8	2	0	5	3	36	0	13	2	0	0	27	0	25	2	36	0	0	0	29	0	1	0	0	0	4
OTU127587	1	6	0	0	0	8	0	11	0	1	0	0	0	0	4	1	3	2	0	6	2	0	8	0	5	4	2	1	0	4	0	1	1	0	0	1	0	0	0	8	0	2	0	4	0	3	9	3	1
OTU312197	8	97	0	172	0	1	24	6	2	12	0	6	0	26	2	5	58	15	0	4	0	23	5	0	3	4	0	0	1	1	0	0	1	3	1	2	1	1	1	6	0	0	1	1	0	1	0	0	2
OTUNew.CleanUp.ReferenceOTU92	0	3	0	0	0	12	0	5	53	0	195	0	82	4	11	78	8	0	5	0	19	3	6	2	1	0	2	3	0	0	0	0	0	0	1	4	0	0	0	0	0	0	1	0	0	0	1	1	0
OTU605483	2	0	0	2	0	1	4	0	0	0	0	0	0	0	0	0	0	0	0	0	0	0	0	0	0	0	0	0	0	0	0	0	0	0	0	0	0	0	0	0	0	0	0	0	0	0	0	0	0
OTU584469	149	3	0	8	0	0	0	27	0	0	0	0	0	0	11	5	3	2	1	1	93	42	3	1	7	1	0	7	1	3	0	0	0	8	20	14	33	2	0	0	0	0	36	0	1	0	0	13	5
OTU161024	0	5	0	12	0	0	0	8	0	7	0	3	0	0	0	5	0	50	0	70	0	0	7	0	12	38	0	5	0	17	0	22	0	0	0	0	0	29	0	36	0	6	0	5	0	35	0	0	0
OTU3347507	0	0	1	0	0	7	5	0	34	0	4	0	61	0	2	0	0	0	0	0	0	0	0	1	0	0	6	1	4	0	0	0	4	0	0	0	2	0	0	0	0	0	2	0	0	0	34	4	0
OTU557368	0	0	0	0	0	0	0	0	0	0	0	0	0	0	0	0	0	0	0	0	0	0	0	0	0	0	0	0	0	0	0	0	0	0	0	0	0	0	0	0	0	0	0	0	0	0	0	0	0
OTUNew.ReferenceOTU585	0	185	0	86	0	0	0	0	0	59	0	58	0	0	0	9	0	44	0	36	0	0	1	0	2	29	0	0	0	0	0	7	0	0	0	0	0	0	0	4	0	0	0	0	0	0	0	0	0
OTUNew.CleanUp.ReferenceOTU170	0	3	0	0	1	0	0	0	0	20	0	0	0	0	0	1	0	18	0	12	0	0	0	0	0	10	0	2	0	14	0	45	0	0	0	0	0	22	0	23	0	1	0	0	0	22	0	0	0
OTU233074	4	0	0	1	0	0	0	38	0	1	0	1	1	0	4	2	0	0	0	0	4	0	2	0	8	3	0	0	0	4	0	0	0	0	0	1	0	13	0	7	0	4	0	7	0	4	3	5	0
OTUNew.CleanUp.ReferenceOTU670	8	3	21	1	20	4	6	5	0	5	0	1	2	0	0	0	6	5	12	0	18	18	5	7	3	1	20	1	5	0	5	0	58	3	13	25	91	0	20	2	71	0	12	3	0	1	0	0	14
OTUNew.CleanUp.ReferenceOTU1598	8	13	0	12	0	3	0	21	0	10	0	9	0	0	7	0	1	12	0	10	3	0	4	0	7	8	0	2	0	12	0	15	0	2	1	0	1	17	0	39	0	10	0	18	0	20	0	3	0
OTUNew.CleanUp.ReferenceOTU521	7	0	0	0	2	13	11	1	4	1	0	0	8	11	1	0	9	4	5	0	3	33	0	2	2	0	4	5	33	1	2	0	2	9	13	3	6	0	3	0	0	2	46	7	0	0	0	5	13
OTU13120	5	9	8	5	8	74	57	18	42	4	10	0	0	75	16	13	49	2	0	3	8	29	14	0	8	1	0	2	9	2	0	0	0	8	6	5	3	0	1	0	0	0	0	0	0	0	0	1	0
OTU3505032	2	13	0	14	4	21	1	72	72	0	28	0	56	6	8	0	0	3	0	1	5	3	5	3	15	2	0	2	0	7	0	5	0	1	3	1	0	2	0	3	0	0	0	0	0	0	2	10	0
OTUNew.CleanUp.ReferenceOTU57	0	0	0	0	0	0	0	12	1	2	4	22	4	41	8	3	4	3	0	0	11	101	0	6	18	3	0	47	6	0	0	0	0	22	129	2	4	2	0	0	0	1	17	11	4	0	0	3	5
OTUNew.CleanUp.ReferenceOTU50	5	5	0	2	0	1	0	50	0	32	0	8	0	6	34	2	0	5	0	0	64	18	12	0	0	0	0	0	0	0	0	0	0	43	21	168	5	12	0	0	0	0	0	1	0	0	0	9	0
OTUNew.ReferenceOTU383	0	4	0	6	0	2	0	15	0	4	0	2	0	3	0	6	0	5	0	5	3	2	48	2	15	2	0	1	0	1	0	12	0	2	7	0	0	19	0	7	0	0	2	26	0	0	1	2	0
OTU4402145	310	70	0	6	0	18	0	51	0	1	0	0	0	1	18	3	0	0	0	0	3	0	0	0	0	0	0	0	0	0	0	0	0	2	0	15	1	1	0	0	0	0	0	0	1	0	0	2	0
OTUNew.ReferenceOTU539	0	0	0	0	1	4	0	0	5	0	2	0	38	31	6	0	0	0	0	0	0	0	0	0	0	0	0	2	0	0	0	0	0	0	0	0	0	0	0	3	0	1	0	2	0	0	0	0	0
OTU706881	4	0	2	0	2	0	2	0	0	0	0	0	0	0	0	0	0	0	0	0	0	1	0	19	3	0	0	6	52	0	12	0	10	0	7	0	10	0	17	0	6	0	15	0	0	0	0	0	12
OTU948029	0	10	0	24	7	29	0	63	138	10	22	9	19	1	15	6	0	13	0	5	2	0	10	2	71	17	0	7	1	4	0	0	0	0	2	8	0	0	0	0	0	0	0	0	0	0	0	0	0
OTU535071	0	0	0	0	0	12	22	3	48	0	1	0	2	27	11	0	6	0	0	0	1	0	0	1	1	0	2	6	0	0	2	0	2	0	3	0	0	0	0	3	6	2	25	3	0	0	14	5	2
OTU547351	26	21	4	22	3	24	12	31	10	14	1	0	0	13	35	36	12	13	5	8	20	7	9	5	35	17	4	9	9	10	3	8	1	10	3	11	7	5	8	0	4	0	2	1	4	1	0	1	0
OTUNew.CleanUp.ReferenceOTU174	0	0	0	0	10	0	0	5	87	0	29	0	58	0	0	0	0	0	0	0	0	0	0	0	0	0	9	3	0	0	0	0	3	0	0	0	0	0	4	0	1	2	9	11	0	0	1	0	5
OTUNew.CleanUp.ReferenceOTU244	0	0	1	0	0	3	0	0	0	0	0	0	0	0	0	0	0	0	0	0	0	0	1	0	0	0	0	1	0	2	0	1	0	0	0	0	1	1	0	1	0	0	8	1	0	1	7	2	5
OTUNew.CleanUp.ReferenceOTU67	1	10	0	1	0	0	0	0	0	0	0	0	0	0	0	20	0	11	0	3	3	0	1	0	4	7	0	0	0	2	0	0	0	0	0	1	0	1	0	9	0	0	0	2	0	67	0	0	0
OTUNew.CleanUp.ReferenceOTU53	0	53	0	32	0	0	0	14	2	29	0	135	0	1	2	75	0	25	0	64	1	3	27	3	5	6	0	1	1	0	0	1	0	0	0	4	1	1	0	2	0	0	1	1	0	0	0	0	0
OTU4343367	0	0	0	0	0	0	4	0	0	0	0	0	0	0	0	0	0	0	0	0	0	0	0	0	0	0	0	0	2	0	0	0	0	0	0	0	5	0	0	0	0	1	0	0	0	0	0	0	1
OTUNew.ReferenceOTU83	0	40	0	118	0	0	0	0	0	49	0	196	0	0	0	5	0	6	0	65	0	0	0	0	0	19	0	0	0	0	0	0	0	0	0	1	0	0	0	0	0	0	0	0	0	0	0	0	0
OTUNew.ReferenceOTU481	0	9	15	0	10	56	257	1	1	0	0	0	2	66	3	0	74	0	0	0	0	6	0	0	0	0	0	0	0	0	0	0	0	0	0	0	0	0	1	0	0	0	0	0	0	0	0	0	0
OTU4408667	10	26	0	10	2	18	16	52	11	5	5	15	9	2	0	11	0	3	0	4	3	0	18	0	23	6	0	8	2	11	0	12	0	1	0	0	0	21	3	5	0	1	0	0	0	8	1	8	0
OTU550826	2	48	0	57	0	0	0	13	0	119	0	103	0	0	7	34	0	15	0	23	5	0	30	0	17	13	0	0	0	0	0	0	0	0	0	1	0	0	0	3	0	0	0	0	0	0	0	0	0
OTU113817	8	0	0	0	0	1	0	29	0	0	0	0	0	3	96	0	0	0	0	0	74	4	0	0	1	0	0	5	1	0	0	0	0	154	20	78	14	0	0	0	0	0	0	0	0	0	0	0	1
OTU227607	13	11	0	3	0	5	0	76	0	0	0	0	0	5	23	1	2	7	0	2	12	0	21	0	18	1	0	7	0	11	0	8	0	3	0	1	0	14	0	21	1	3	0	0	0	7	0	0	0
OTUNew.CleanUp.ReferenceOTU211	2	8	0	0	0	0	1	18	0	0	0	0	0	5	0	0	0	0	0	0	0	0	0	0	0	0	0	0	0	5	0	0	0	0	0	0	0	6	0	0	0	0	0	0	0	2	1	7	0
OTU856798	2	47	0	93	1	0	0	0	1	13	0	76	0	0	1	18	0	27	0	113	0	0	0	0	3	13	0	4	0	3	0	11	0	0	0	1	0	5	0	24	0	0	0	0	0	6	0	0	0
OTUNew.CleanUp.ReferenceOTU54	43	18	16	16	56	31	2	22	10	1	4	20	0	19	54	19	25	11	4	1	10	0	38	0	14	5	10	3	1	0	0	0	2	2	0	12	0	0	1	0	5	0	0	0	0	0	0	0	0
OTUNew.CleanUp.ReferenceOTU1063	18	21	0	2	0	0	0	37	0	8	0	9	0	0	7	0	1	9	0	4	5	7	12	0	7	14	0	1	0	6	0	14	0	3	3	5	0	26	0	39	0	13	0	57	0	6	0	2	0
OTUNew.CleanUp.ReferenceOTU114	6	2	0	0	0	5	2	4	1	0	0	0	0	5	2	0	6	1	0	0	0	10	0	32	4	0	1	2	2	0	3	0	6	0	1	0	13	13	23	4	0	6	4	1	0	6	0	2	4
OTU4427396	0	0	0	0	0	0	0	0	0	0	0	0	0	0	0	0	0	0	0	0	0	0	0	0	0	0	0	3	0	0	0	0	0	0	0	0	1	0	0	0	0	1	0	0	1	0	0	0	0
OTU545460	0	0	0	0	0	0	0	1	0	0	0	0	0	0	0	0	0	0	0	0	0	0	0	0	0	0	0	0	0	0	0	0	0	0	0	0	1	0	0	0	0	0	0	0	0	0	0	0	0
OTUNew.ReferenceOTU287	6	4	0	8	0	0	2	68	0	9	0	40	0	1	8	39	0	47	0	40	0	0	0	0	4	20	0	0	0	19	0	20	0	0	0	4	0	12	0	15	0	1	0	0	0	1	0	4	0
OTU110525	0	39	0	87	0	0	0	0	1	30	0	129	0	0	0	5	0	34	0	64	1	1	1	0	0	32	0	0	1	0	0	22	0	0	0	0	0	1	1	29	0	0	0	0	0	2	0	0	0
OTU248006	6	0	0	0	0	77	12	1	99	0	8	0	2	5	0	0	0	2	2	0	1	2	10	5	5	0	0	2	2	11	0	0	0	10	0	4	3	4	0	0	0	0	5	7	0	0	6	0	1
OTUNew.CleanUp.ReferenceOTU77	2	4	0	7	0	2	0	3	4	1	0	1	1	0	0	4	0	43	0	14	9	4	36	0	41	51	0	0	0	37	0	20	0	13	0	8	0	23	0	16	0	5	0	17	1	3	0	9	0
OTU4383705	0	20	0	87	0	0	0	0	0	12	0	253	0	0	0	0	0	9	0	93	1	0	0	0	0	10	0	0	0	0	0	0	0	0	0	0	0	0	0	0	1	0	0	0	0	0	0	0	0
OTU796028	0	0	0	0	0	0	0	0	0	0	0	0	0	0	2	0	0	0	0	0	141	5	20	2	10	0	0	3	0	1	0	0	0	108	12	137	8	3	7	0	5	0	0	2	0	0	0	2	0
OTU1128538	3	4	0	17	0	7	0	53	0	15	0	43	1	0	0	14	0	14	0	12	3	0	15	0	17	38	0	3	0	15	0	38	0	2	0	0	0	15	0	34	1	1	0	8	0	5	0	0	0
OTU813557	0	0	0	0	1	0	0	0	0	0	0	0	0	0	0	0	0	0	0	0	0	0	0	0	0	0	0	0	0	0	0	0	0	0	0	0	8	0	0	0	0	0	0	0	0	0	0	0	0
OTUNew.ReferenceOTU601	0	0	0	0	0	0	0	0	0	0	0	0	0	0	0	0	0	0	0	0	0	0	0	0	0	0	0	0	0	0	0	0	0	0	0	0	0	1	0	0	0	2	2	0	0	2	0	2	0
OTU239375	2	2	0	0	0	74	10	6	40	0	164	0	64	9	17	4	0	3	0	0	0	6	2	5	7	8	4	11	4	0	1	0	0	0	1	16	3	0	0	0	1	0	3	0	0	0	0	3	1
OTU820439	13	7	0	0	0	0	0	44	0	0	0	0	0	0	80	0	0	0	0	0	41	4	5	2	0	0	0	0	0	0	0	0	0	34	9	229	0	2	0	1	0	0	0	0	0	0	0	0	0
OTUNew.ReferenceOTU475	0	16	0	18	0	0	0	16	0	12	0	38	0	0	0	21	0	16	0	41	0	0	7	0	15	18	0	0	0	4	0	14	0	0	0	2	0	0	0	9	0	0	0	0	0	0	0	0	0
OTUNew.CleanUp.ReferenceOTU448	6	0	41	0	45	3	2	0	3	0	3	0	0	1	0	1	0	0	5	0	0	23	1	1	1	2	50	3	10	0	3	0	66	0	7	5	60	0	17	0	74	0	8	0	0	0	0	0	1
OTUNew.CleanUp.ReferenceOTU101	0	0	0	0	0	0	0	2	0	1	0	0	0	0	0	0	0	8	0	4	4	2	2	0	11	19	0	1	0	11	0	35	0	3	1	0	0	24	0	66	0	3	3	3	0	29	10	5	1
OTU530962	0	0	0	0	0	3	0	0	0	0	0	0	3	0	3	17	0	13	0	12	0	0	0	0	13	7	0	8	0	6	0	4	0	0	0	0	0	3	0	63	0	0	0	0	0	23	0	0	0
OTU3651717	11	31	20	29	15	8	1	7	3	7	4	2	1	13	5	29	5	22	7	4	4	0	24	17	10	10	38	2	52	7	19	12	20	1	0	3	1	0	1	1	0	0	0	7	0	0	2	2	0
OTU295470	0	10	0	1	1	5	0	10	132	2	35	0	53	0	0	6	0	3	0	0	2	2	4	7	11	3	4	0	0	0	0	0	0	1	0	9	2	2	0	0	0	2	3	21	0	0	6	3	0
OTU536986	5	19	0	38	0	5	6	54	1	25	0	47	0	2	0	7	1	16	0	2	10	0	28	0	44	8	0	27	2	10	0	1	0	7	3	1	2	2	0	9	2	0	0	0	0	7	0	0	0
OTU828880	0	0	0	0	0	0	1	11	1	0	0	0	2	4	0	0	0	0	0	0	0	0	0	0	0	5	0	3	1	0	0	0	0	0	0	0	0	0	0	4	0	1	0	0	0	12	12	0	0
OTUNew.ReferenceOTU367	64	151	0	25	2	0	6	43	3	20	0	11	0	2	9	20	5	6	0	0	9	2	19	4	6	3	1	15	0	2	0	2	0	0	0	8	9	4	2	0	0	0	1	0	0	0	1	0	0
OTUNew.CleanUp.ReferenceOTU423	0	0	5	0	15	0	3	0	8	0	7	0	42	0	1	1	2	0	7	0	0	2	0	2	0	0	34	5	6	0	0	0	10	0	2	4	23	0	4	1	10	2	14	3	0	0	16	1	4
OTU233100	3	0	0	1	0	0	0	3	0	0	0	0	1	0	0	0	0	0	0	0	0	0	0	0	0	0	0	1	0	1	0	2	0	0	6	0	0	2	0	0	0	0	0	0	0	3	12	3	0
OTUNew.CleanUp.ReferenceOTU766	5	0	37	0	41	1	1	3	11	0	3	1	23	3	3	0	9	0	23	0	0	9	1	6	5	0	11	4	5	1	3	0	11	0	3	7	62	4	11	2	19	2	10	7	0	1	8	1	8
OTUNew.ReferenceOTU299	0	22	0	6	0	1	0	16	0	2	0	4	0	0	1	44	0	66	0	36	0	1	12	0	16	41	0	1	0	44	0	17	0	3	0	2	0	15	0	45	0	1	0	0	0	2	2	0	0
OTU4304265	0	0	0	0	0	0	0	4	0	0	8	1	15	3	15	84	45	11	0	11	10	1	13	0	1	13	0	3	0	3	0	60	3	4	0	5	0	13	1	6	0	0	8	6	2	7	1	15	3
OTUNew.ReferenceOTU157	0	156	0	50	0	0	0	22	0	11	0	3	0	0	0	13	0	15	0	18	1	0	3	0	16	16	0	3	0	1	0	24	0	2	0	0	0	12	0	28	0	2	0	4	0	36	3	0	0
OTUNew.ReferenceOTU126	1	3	26	0	46	15	16	1	0	1	0	0	0	3	0	4	13	2	11	3	4	5	5	2	1	1	10	1	9	0	1	1	17	2	7	0	6	3	50	0	162	0	9	1	1	0	0	1	2
OTUNew.CleanUp.ReferenceOTU74	0	0	0	0	0	6	4	0	0	0	0	0	0	8	0	1	0	0	0	0	0	0	6	0	5	0	0	3	0	0	0	0	0	0	0	0	0	6	0	0	0	2	17	2	0	0	141	1	3
OTU809478	11	16	0	3	4	70	3	43	44	24	24	0	0	21	17	26	8	4	0	0	7	1	23	1	29	7	0	39	0	0	0	4	0	4	3	10	0	5	2	0	0	0	8	3	0	0	0	0	0
OTUNew.ReferenceOTU187	22	54	0	30	2	2	4	141	1	6	1	28	0	1	0	5	2	29	0	15	1	20	10	15	1	3	5	2	1	0	2	3	1	0	19	0	0	0	0	1	0	0	0	0	0	0	0	0	1
OTUNew.CleanUp.ReferenceOTU104	0	0	0	0	0	0	0	0	0	0	0	0	0	0	39	7	0	0	0	0	180	1	9	0	37	0	0	0	0	7	0	16	0	71	2	34	0	16	0	9	0	0	0	12	0	0	0	6	0
OTU4419624	0	0	1	0	3	0	0	0	0	1	0	1	2	1	1	27	2	34	0	19	29	6	16	1	98	72	3	11	2	28	2	5	1	27	0	26	0	3	0	4	11	0	0	1	0	1	0	1	0
OTU583343	1	5	16	0	23	6	7	1	1	3	0	0	1	0	1	2	9	0	10	0	5	4	1	5	0	1	12	4	8	0	14	0	25	0	1	2	17	11	68	0	169	0	14	2	0	0	0	1	0
OTU135786	1	3	17	0	42	6	19	0	1	0	0	0	0	19	0	1	17	0	15	0	0	9	2	23	1	0	39	0	15	0	23	0	46	0	16	1	29	0	18	0	25	0	5	0	0	0	0	0	1
OTUNew.ReferenceOTU246	10	52	0	12	0	8	0	17	0	2	0	11	0	0	2	11	0	27	0	19	8	0	42	0	1	38	0	6	0	9	0	1	0	4	0	11	0	11	0	57	0	7	0	12	0	17	0	3	0
OTUNew.CleanUp.ReferenceOTU68	0	7	45	2	27	1	19	3	1	0	0	27	2	27	1	1	51	0	8	3	3	21	1	5	0	3	36	0	18	1	22	0	19	0	2	0	2	0	0	0	0	1	1	0	0	0	2	0	1
OTUNew.CleanUp.ReferenceOTU124	0	4	0	2	0	0	0	0	0	2	0	0	0	0	10	26	0	5	0	0	32	8	40	0	141	12	0	7	0	39	0	0	0	7	3	35	0	11	0	2	0	0	0	2	0	0	0	6	0
OTUNew.ReferenceOTU332	2	0	0	0	0	0	0	2	0	0	0	0	0	0	27	0	0	0	0	0	275	3	4	0	0	0	0	3	0	0	0	0	0	88	18	34	4	0	0	0	0	0	0	0	0	0	0	0	0
OTU251981	4	61	0	25	0	0	0	9	0	35	0	10	0	1	4	27	0	13	0	0	3	4	6	1	17	24	0	13	1	0	0	63	0	4	4	15	0	5	0	3	0	1	1	7	0	1	0	9	0
OTU232886	0	0	0	0	0	0	0	0	0	0	0	0	0	0	0	0	0	0	0	0	0	0	0	0	0	0	0	0	0	0	0	1	0	0	0	0	0	0	0	0	0	0	0	0	0	0	4	0	0
OTUNew.ReferenceOTU415	1	74	0	27	0	2	0	10	16	68	3	7	2	0	1	25	0	6	0	1	0	0	6	0	1	16	0	1	0	1	0	126	0	0	0	2	0	5	0	25	0	0	0	2	0	4	0	0	0
OTU838426	0	22	1	68	0	0	0	0	0	69	0	221	0	0	0	0	0	5	0	51	0	0	0	0	1	12	0	0	0	0	0	0	0	0	0	0	0	0	0	3	0	0	0	0	0	0	0	0	0
OTU1107480	3	24	0	9	0	1	0	11	0	2	0	0	0	0	0	5	0	33	0	0	0	0	0	0	4	3	0	5	0	9	0	41	0	0	0	0	0	24	0	123	0	3	0	4	0	11	0	1	0
OTUNew.CleanUp.ReferenceOTU110	0	6	1	0	0	0	1	0	1	3	0	0	1	0	0	0	0	0	0	0	1	0	0	0	0	0	0	3	1	0	0	0	0	0	0	0	9	0	7	0	0	0	6	0	1	0	0	0	0
OTU1085699	3	8	34	0	39	1	27	0	6	0	7	0	11	32	4	5	62	2	2	2	1	24	0	0	6	11	4	0	0	1	0	28	3	1	1	0	19	1	5	1	4	0	1	0	0	0	6	0	1
OTU1136940	5	221	0	74	0	0	0	25	0	24	0	25	0	0	0	26	0	15	0	3	1	0	2	0	0	4	0	0	0	0	0	3	0	0	0	0	0	9	0	9	0	2	0	0	0	0	0	0	0
OTU570846	1	5	0	0	0	5	1	80	0	0	0	0	0	1	1	4	0	3	1	0	0	1	1	22	1	0	1	0	0	1	1	0	0	0	0	2	0	15	0	2	0	10	1	7	0	4	6	1	0
OTUNew.CleanUp.ReferenceOTU148	5	1	0	8	0	21	0	23	2	0	2	0	1	25	0	6	0	2	0	20	4	0	4	2	17	7	0	5	0	7	0	22	0	0	2	2	1	7	0	18	0	6	0	5	0	8	6	3	0
OTU552685	5	9	0	2	0	3	14	1	36	2	4	0	4	0	0	0	0	0	0	0	0	2	0	0	0	0	0	5	9	0	4	1	3	0	5	2	19	0	14	0	0	0	0	1	1	0	0	1	1
OTUNew.CleanUp.ReferenceOTU1296	16	7	43	3	28	27	63	6	5	3	2	2	0	10	3	10	9	1	31	2	10	26	5	5	5	4	17	4	0	0	1	0	8	4	2	3	10	0	21	0	8	0	26	1	0	0	0	1	2
OTUNew.CleanUp.ReferenceOTU143	0	0	2	0	1	19	11	1	15	0	2	0	7	46	0	1	45	0	0	0	3	0	0	0	0	0	0	1	0	0	10	0	0	0	0	0	0	0	0	0	0	0	4	2	0	0	18	0	2
OTUNew.ReferenceOTU127	0	0	4	0	15	115	51	44	107	10	28	0	5	3	2	6	10	1	0	0	1	25	1	0	2	0	0	1	1	0	0	0	0	0	2	0	0	0	0	0	0	0	4	0	3	0	0	0	0
OTU532823	0	0	0	0	0	4	0	0	59	0	60	1	125	0	0	1	1	0	0	0	0	0	0	1	2	1	0	0	0	0	0	7	0	0	0	0	0	0	0	0	7	0	1	0	2	0	3	6	0
OTUNew.CleanUp.ReferenceOTU94	0	0	0	0	0	18	3	21	2	6	10	1	3	4	1	87	3	0	1	0	37	3	13	3	8	0	3	77	9	1	0	11	0	2	13	15	0	6	0	0	0	1	21	33	9	0	0	9	0
OTUNew.CleanUp.ReferenceOTU86	0	2	0	4	0	68	9	7	136	1	31	0	60	56	24	13	7	4	0	0	7	4	1	0	0	4	0	0	0	0	0	0	0	3	0	0	0	0	0	0	0	0	0	0	0	0	0	0	0
OTU236868	16	14	0	7	0	0	0	73	0	5	0	4	0	2	9	8	0	28	0	21	13	0	47	0	32	8	0	5	0	21	0	7	0	1	0	25	0	1	0	26	0	0	0	2	0	3	0	9	0
OTU2981822	0	1	0	2	0	0	0	1	0	2	0	0	0	0	0	0	0	16	0	17	1	21	0	16	4	2	0	21	15	1	0	29	0	16	25	0	12	3	1	18	0	0	13	12	1	1	0	4	19
OTUNew.ReferenceOTU550	0	0	0	2	0	0	0	0	33	0	37	0	71	8	2	0	38	0	3	0	0	70	0	1	0	0	0	9	7	0	0	0	0	0	0	0	2	0	0	0	1	0	9	4	3	0	0	0	7
OTUNew.ReferenceOTU54	0	0	0	0	0	0	0	0	0	0	0	0	0	0	0	0	0	0	0	1	0	0	2	0	0	0	0	0	0	0	0	0	0	0	0	0	0	0	0	0	0	0	0	1	0	0	0	0	0
OTUNew.CleanUp.ReferenceOTU460	42	54	0	11	0	3	1	45	0	23	0	30	0	0	13	27	1	13	0	14	20	1	17	0	4	5	0	6	0	13	0	8	0	2	1	33	0	2	0	10	0	2	0	0	0	5	0	0	0
OTU512414	6	45	0	34	0	0	0	36	0	42	0	99	0	0	0	14	0	41	0	97	0	0	0	0	0	16	0	0	0	0	0	6	0	0	0	0	0	2	0	2	0	0	0	0	0	0	0	0	0
OTU319629	109	0	0	1	0	54	5	74	1	0	0	0	0	9	17	0	2	0	0	0	4	5	0	2	1	2	0	10	0	4	0	0	0	1	5	5	0	4	0	0	0	2	0	15	0	1	8	0	1
OTU310072	7	8	26	2	28	8	8	1	3	10	0	7	0	1	9	5	11	3	1	0	3	1	7	8	2	4	23	5	7	3	20	13	33	2	0	2	22	0	15	0	75	0	5	0	0	0	2	0	0
OTU1109458	3	17	0	4	0	0	0	4	1	14	0	11	1	0	5	33	0	22	0	11	1	0	10	0	26	32	0	5	0	37	0	111	0	0	0	4	0	12	0	37	0	1	1	1	0	0	9	0	0
OTUNew.CleanUp.ReferenceOTU62	24	0	0	0	0	1	0	96	1	0	1	0	0	3	16	0	3	0	1	0	14	2	8	3	42	0	0	7	0	6	0	0	0	4	4	5	7	0	0	3	2	0	22	6	0	0	0	14	1
OTUNew.CleanUp.ReferenceOTU517	9	3	0	2	0	0	2	8	7	1	0	2	0	0	3	5	0	9	0	3	4	1	2	0	6	4	0	1	0	1	0	0	1	2	1	30	4	10	0	32	0	9	0	36	0	3	2	7	2
OTU314959	7	6	0	1	0	2	0	29	3	4	0	0	0	0	15	2	0	0	0	0	88	2	13	2	8	0	0	12	0	0	0	6	0	29	8	139	3	13	0	1	0	0	1	3	1	0	8	1	0
OTUNew.ReferenceOTU485	1	3	0	4	0	0	0	2	7	0	0	0	12	6	7	4	6	0	0	6	0	3	0	0	0	2	1	2	0	0	0	2	0	0	0	0	0	7	0	9	0	2	1	10	0	3	9	0	0
OTU837919	0	7	0	7	0	0	0	0	0	0	0	0	0	0	0	7	0	1	0	11	2	0	3	0	3	4	0	0	0	0	0	1	0	0	0	0	0	8	0	5	0	1	0	8	0	4	0	0	0
OTUNew.CleanUp.ReferenceOTU1912	7	16	8	4	3	14	3	10	69	9	8	4	28	6	2	7	7	4	2	5	13	7	10	1	6	5	5	7	5	3	2	1	6	3	2	13	7	1	5	1	1	3	14	3	3	0	4	4	1
OTU667148	7	17	2	0	0	3	9	50	0	3	0	0	0	5	53	8	2	11	0	7	5	12	7	0	22	4	0	15	0	44	14	8	0	21	6	20	1	26	7	0	0	0	0	3	0	1	0	3	0
OTU233677	4	9	0	5	0	0	5	36	0	0	0	0	0	0	2	0	0	0	5	2	0	1	7	7	0	1	0	5	8	0	0	5	0	1	0	0	2	15	0	3	0	0	7	13	0	1	0	2	3
OTU4482960	18	13	3	4	4	6	0	33	7	23	4	1	2	6	15	13	3	15	2	10	10	3	24	4	13	15	0	3	6	12	0	1	0	9	1	31	2	7	1	9	0	0	0	0	1	2	0	5	0
OTUNew.CleanUp.ReferenceOTU79	3	14	0	6	0	0	0	8	0	0	0	6	0	0	0	0	0	32	0	14	0	0	9	0	0	20	0	1	0	18	0	51	0	0	0	1	0	37	0	96	0	4	0	0	0	27	0	1	0
OTUNew.CleanUp.ReferenceOTU162	0	0	13	1	10	0	19	1	0	0	0	0	0	1	0	0	6	0	3	0	0	14	0	1	0	0	2	7	12	0	8	0	6	0	14	2	9	0	6	0	3	0	7	0	0	0	0	0	1
OTUNew.CleanUp.ReferenceOTU65	0	5	0	18	0	0	0	0	0	5	0	20	0	2	2	37	0	51	0	60	2	0	4	0	30	30	0	1	0	16	0	28	0	0	0	1	0	24	0	42	0	0	0	2	0	4	0	0	0
OTUNew.CleanUp.ReferenceOTU70	0	10	0	0	0	0	0	5	0	0	0	1	0	1	0	1	6	0	3	0	1	10	5	1	0	1	0	8	0	9	0	0	1	0	0	1	6	13	0	9	0	4	25	6	3	3	11	18	15
OTUNew.CleanUp.ReferenceOTU85	0	0	29	0	17	2	12	8	0	0	2	0	1	4	0	0	2	2	24	1	0	14	0	39	0	1	21	0	17	0	63	0	92	2	1	1	8	0	30	1	21	0	4	0	0	0	0	0	2
OTU576238	0	0	0	0	0	0	0	0	0	0	0	0	0	0	0	0	0	0	0	0	0	0	1	0	0	0	0	0	0	0	0	0	0	0	0	0	6	0	0	0	0	0	0	0	0	0	0	0	0
OTUNew.ReferenceOTU580	20	4	0	0	0	0	0	67	1	0	0	0	0	0	15	11	0	1	0	1	13	0	10	0	16	0	0	3	0	5	0	1	0	6	0	0	0	5	0	5	0	12	0	38	0	2	0	0	0
OTU4451039	6	2	48	2	52	10	66	4	5	2	6	0	1	15	1	4	6	0	11	4	1	14	1	7	0	1	26	5	1	0	11	0	23	0	0	2	2	1	12	6	3	0	0	0	0	0	0	0	0
OTU4095168	17	25	0	13	0	0	0	37	0	10	0	8	0	0	5	18	0	32	0	16	5	5	11	0	12	25	0	1	0	14	0	0	0	5	0	11	0	11	0	34	0	3	0	22	0	36	0	7	0
OTU4417972	0	12	0	0	1	14	21	1	3	4	0	1	0	0	0	0	0	3	2	0	2	9	0	0	0	1	0	36	8	0	0	0	0	5	1	0	3	0	2	0	0	0	8	1	6	0	0	2	1
OTUNew.ReferenceOTU267	0	3	0	0	1	50	11	3	105	0	82	0	72	32	2	2	15	0	0	0	1	13	0	0	0	1	0	0	3	0	0	0	0	1	3	1	0	4	0	0	0	0	1	0	0	0	0	3	1
OTU234558	2	0	0	7	0	0	1	5	2	0	0	0	0	1	0	3	0	4	1	11	2	0	4	0	0	0	0	0	0	0	0	0	0	0	0	0	0	10	0	6	1	6	0	32	0	2	33	1	0
OTUNew.CleanUp.ReferenceOTU69	54	2	0	0	0	9	0	106	0	1	0	0	0	2	192	0	3	0	0	0	0	26	0	0	0	0	0	0	0	0	0	0	0	4	17	0	1	0	0	0	0	0	0	0	0	0	0	1	0
OTUNew.CleanUp.ReferenceOTU123	0	0	0	0	0	0	0	0	0	0	0	0	0	0	0	0	0	0	1	0	0	0	0	0	0	0	0	0	0	33	0	39	0	0	0	0	0	30	0	37	0	1	0	0	0	5	0	0	0
OTUNew.CleanUp.ReferenceOTU164	10	7	0	5	0	1	0	38	0	4	0	8	0	1	25	13	0	0	0	0	95	0	23	0	5	3	0	0	0	1	0	0	0	113	12	26	3	6	0	0	0	0	0	0	0	0	0	7	0
OTUNew.CleanUp.ReferenceOTU73	0	0	64	0	90	6	20	1	0	0	3	0	0	12	1	0	25	0	8	0	0	30	0	0	0	0	30	1	10	0	13	0	19	0	0	0	2	0	0	0	12	0	0	0	0	0	0	0	0
OTU1547121	3	5	0	2	0	3	0	4	40	0	3	0	17	1	0	14	0	14	0	7	6	0	29	0	43	0	1	11	0	14	0	1	0	1	0	0	0	7	0	9	0	6	0	21	0	9	0	1	0
OTUNew.CleanUp.ReferenceOTU1326	0	42	0	78	0	0	0	0	0	25	0	132	1	0	1	3	0	34	0	79	0	0	0	0	0	17	0	0	0	0	0	2	0	0	0	0	0	0	0	7	0	0	0	0	0	0	0	0	0
OTUNew.CleanUp.ReferenceOTU127	42	10	52	19	156	6	10	42	2	9	0	2	0	8	15	2	0	3	0	0	0	5	0	0	0	0	0	0	0	0	0	0	0	0	1	0	0	0	0	0	0	0	0	0	0	0	0	0	0
OTU323845	2	7	0	3	1	0	2	12	1	2	0	1	0	0	1	0	1	6	0	4	0	18	0	2	7	4	1	0	2	0	0	0	3	0	4	0	15	8	1	30	0	6	5	17	0	7	5	0	8
OTU151457	0	0	3	0	6	58	229	0	0	0	0	0	7	5	0	0	18	0	3	0	0	59	0	1	0	0	0	0	7	0	0	0	3	0	20	0	0	0	0	0	0	0	0	0	0	0	0	0	0
OTU1139492	6	1	0	7	0	0	1	20	0	0	0	0	0	0	2	29	0	2	0	0	0	0	3	0	0	0	0	0	0	3	0	0	0	0	0	0	0	0	0	0	0	1	0	2	0	0	4	4	1
OTU826918	29	83	0	51	0	0	0	85	0	22	0	27	0	0	0	1	0	10	0	4	1	0	9	0	2	20	0	0	0	2	0	0	0	1	0	0	0	4	0	60	0	0	0	2	0	2	0	0	0
OTUNew.CleanUp.ReferenceOTU2056	0	139	0	92	0	0	0	8	0	34	0	36	0	0	0	17	0	33	0	35	0	0	2	0	2	12	0	0	0	1	0	4	0	0	0	0	0	1	0	2	0	0	0	0	0	0	0	0	0
OTUNew.ReferenceOTU129	0	12	0	38	0	0	0	0	0	83	0	246	0	0	0	0	0	1	0	37	0	0	0	0	0	0	0	0	0	0	0	0	0	0	0	0	0	0	0	0	0	0	0	0	0	0	0	0	0
OTUNew.CleanUp.ReferenceOTU368	3	2	0	0	1	2	1	2	3	0	0	0	1	1	2	0	0	1	0	0	3	2	3	1	3	1	2	0	0	1	0	1	1	2	2	3	7	5	8	5	0	7	7	38	0	3	5	0	5
OTUNew.CleanUp.ReferenceOTU616	0	4	0	1	0	0	0	7	1	0	0	1	0	0	0	4	0	6	0	10	12	4	12	0	3	13	1	1	0	15	0	27	0	5	3	5	0	11	0	84	0	2	0	3	0	55	0	0	0
OTU227980	0	0	0	0	0	0	0	0	0	0	0	0	0	0	0	0	0	0	0	0	0	0	0	0	0	0	0	0	0	0	0	0	0	0	0	0	0	0	0	0	0	0	0	0	0	0	13	0	0
OTUNew.CleanUp.ReferenceOTU163	3	17	0	0	0	0	0	232	0	3	0	10	0	0	7	0	0	0	0	0	0	0	2	0	6	0	0	0	0	1	0	40	0	0	0	0	0	19	0	14	0	1	0	1	0	3	0	0	0
OTU825256	4	15	0	34	0	1	0	16	0	13	0	103	5	1	23	3	8	6	0	51	10	16	1	1	12	15	0	0	0	0	0	0	0	10	31	28	4	0	0	0	0	0	0	0	0	0	0	0	0
OTUNew.ReferenceOTU447	18	10	39	3	46	24	63	3	9	0	4	0	1	30	5	0	40	0	0	0	4	39	0	0	0	0	0	0	0	0	0	0	0	0	1	0	0	0	0	0	0	0	7	0	0	0	0	0	0
OTU4404440	0	2	36	1	46	0	8	2	1	0	4	0	0	14	2	8	62	0	19	0	3	36	0	12	0	1	46	0	0	0	7	0	2	0	0	2	5	0	3	0	0	1	22	2	0	0	4	11	0
OTU322934	0	0	10	0	12	4	21	0	1	0	0	0	0	1	0	0	1	0	1	0	0	18	0	17	0	0	6	4	20	0	47	0	37	0	13	0	32	0	42	0	22	0	6	0	0	0	0	0	2
OTU224680	0	3	0	0	0	0	0	3	0	0	0	6	0	0	1	13	11	10	0	9	0	0	6	0	0	22	0	0	0	5	0	34	0	0	0	0	1	9	0	60	0	2	0	0	0	19	0	0	0
OTU4322607	0	0	0	0	0	2	6	0	10	0	15	3	36	17	2	0	16	0	1	0	0	0	0	1	0	0	0	0	0	0	0	0	0	3	0	0	0	1	0	0	0	1	0	0	1	0	15	18	2
OTU646279	0	0	1	0	0	0	5	3	9	0	18	0	1	5	0	1	0	0	0	2	0	9	14	4	3	0	0	1	4	4	1	0	2	0	1	0	8	5	1	3	0	1	55	5	0	0	15	0	1
OTUNew.CleanUp.ReferenceOTU846	4	0	14	0	34	1	0	0	3	0	0	2	0	0	0	0	2	2	0	0	3	8	0	3	0	0	38	0	4	0	0	0	53	0	12	0	56	0	54	0	70	0	3	0	0	0	0	0	5
OTU318668	0	9	0	8	0	0	0	0	0	3	0	12	0	0	2	13	0	38	0	78	0	0	0	0	40	33	0	12	0	12	0	77	0	0	4	0	0	3	0	33	0	0	0	0	0	6	0	0	0
OTUNew.ReferenceOTU144	0	13	0	10	0	0	0	3	0	4	0	1	0	0	0	0	0	0	0	0	0	0	4	0	0	7	0	0	0	5	8	0	3	1	0	2	4	15	0	29	0	8	1	3	0	23	0	1	0
OTUNew.CleanUp.ReferenceOTU71	8	25	0	26	0	0	0	47	13	14	13	34	50	0	0	4	0	22	0	27	8	0	7	0	14	14	0	0	0	10	0	30	0	0	0	0	0	8	0	9	0	0	0	2	0	1	3	0	0
OTUNew.CleanUp.ReferenceOTU437	4	1	10	0	24	0	3	0	2	0	0	0	1	1	0	0	1	0	2	0	0	8	0	2	1	0	10	0	2	0	2	0	10	0	5	0	21	1	10	0	5	1	13	9	0	0	9	0	7
OTU229165	0	0	0	0	0	0	9	0	8	2	12	0	0	5	0	0	0	1	0	0	2	16	15	1	7	0	0	0	9	2	6	5	1	0	1	0	1	2	0	1	0	0	10	2	0	5	0	4	1
OTUNew.CleanUp.ReferenceOTU2677	3	6	0	9	0	2	0	16	0	3	0	4	0	2	4	20	0	12	0	15	3	0	15	0	18	18	0	3	0	7	0	18	0	1	0	0	0	28	0	39	0	8	0	12	0	20	0	5	0
OTU319986	0	11	0	15	0	0	0	9	0	0	0	5	0	0	0	7	0	23	0	20	3	0	11	0	4	27	0	1	0	11	0	5	0	2	0	0	0	10	0	57	0	1	0	0	0	11	0	0	0
OTU3719109	0	0	0	0	0	0	0	0	1	0	0	0	0	0	0	0	0	0	0	0	0	0	0	0	0	0	0	3	0	0	0	0	1	0	0	0	0	0	0	0	0	0	0	0	0	0	0	0	0
OTUNew.ReferenceOTU304	7	2	0	0	0	0	0	37	0	9	0	0	0	0	27	7	0	2	0	0	5	13	35	0	50	9	0	6	0	14	0	0	0	18	15	40	0	6	0	0	0	0	0	6	0	0	0	12	0
OTUNew.CleanUp.ReferenceOTU83	0	2	0	0	0	0	0	2	0	0	0	0	0	0	0	4	0	13	0	5	3	0	4	0	14	5	0	1	1	11	0	14	0	1	0	1	0	10	0	5	0	0	0	0	0	0	0	1	0
OTU313595	4	1	5	0	6	7	1	5	5	0	1	0	3	1	1	0	2	0	3	0	5	19	0	2	0	0	8	0	5	0	1	0	9	4	6	11	46	8	14	3	3	3	2	26	0	0	19	0	3
OTUNew.CleanUp.ReferenceOTU465	1	1	28	0	69	2	3	0	4	0	0	0	2	0	0	0	2	0	0	0	0	6	0	3	0	0	6	0	3	0	4	0	29	0	8	0	68	0	57	0	63	0	6	0	0	0	0	0	4
OTU544626	1	13	0	22	0	0	0	8	0	13	0	30	0	0	1	0	0	25	0	41	3	0	0	0	3	15	0	0	0	16	0	30	0	0	0	1	0	25	0	29	0	3	0	1	0	8	0	1	0
OTUNew.ReferenceOTU154	0	8	0	0	0	0	0	4	0	3	0	33	0	0	0	0	0	0	0	0	0	0	0	0	1	1	0	0	0	1	0	0	0	0	0	0	0	3	0	1	0	1	0	0	0	2	2	1	0
OTU323889	2	0	3	0	6	7	22	0	7	0	7	0	0	8	0	0	10	0	5	0	2	19	0	24	0	0	12	0	10	0	17	0	12	2	71	0	14	1	11	0	1	0	18	0	0	0	11	2	9
OTU834814	10	19	0	6	0	0	0	22	0	9	0	19	0	0	0	7	0	13	0	16	4	1	5	0	9	15	0	0	0	3	0	11	0	0	1	8	0	26	0	42	0	5	0	32	0	13	0	0	0
OTU1107274	4	0	2	1	0	3	2	1	12	0	41	0	14	102	15	0	66	0	6	1	3	15	5	2	7	0	11	3	9	0	2	0	5	0	6	3	9	0	1	0	5	0	2	4	0	0	0	19	1
OTUNew.ReferenceOTU117	2	0	0	0	0	5	3	1	22	0	0	0	0	2	7	0	2	0	0	0	1	6	0	0	2	0	0	10	27	0	0	0	0	5	2	0	6	6	24	0	0	4	67	14	3	0	1	1	12
OTUNew.CleanUp.ReferenceOTU61	1	0	6	0	7	3	17	1	0	0	0	0	0	23	0	0	8	0	3	0	0	21	0	3	0	0	5	0	3	0	9	0	9	0	9	2	37	0	38	0	21	0	4	0	1	0	0	0	2
OTU648164	1	0	0	6	0	0	2	97	0	31	0	19	0	2	3	11	6	16	0	2	10	2	46	0	16	17	0	14	0	0	0	19	0	0	0	9	1	0	0	5	0	0	1	3	0	2	0	1	1
OTU661793	1	0	0	0	0	0	5	0	0	0	0	0	0	0	0	0	0	0	0	0	0	4	0	0	0	0	0	0	0	0	0	0	0	0	0	0	0	0	0	0	0	0	0	0	0	0	0	0	0
OTUNew.CleanUp.ReferenceOTU80	12	29	0	1	0	1	0	1	0	3	0	0	0	0	25	8	0	33	0	22	8	10	19	0	2	19	0	13	0	70	0	24	0	1	5	5	0	3	0	28	0	0	0	1	0	6	0	2	0
OTU1712363	11	15	2	9	1	1	1	23	0	1	0	7	0	5	2	5	14	6	0	6	1	11	1	0	4	6	1	0	6	8	3	12	2	0	7	1	2	26	1	21	0	9	4	24	0	11	0	3	2
OTU567643	0	1	9	0	32	0	0	1	4	3	1	0	0	1	1	1	0	0	1	0	22	1	2	2	1	2	13	6	0	2	0	0	26	3	3	17	63	2	65	1	54	0	5	1	0	0	0	4	1
OTU538871	0	20	0	14	0	0	0	8	0	13	0	5	0	0	0	4	0	15	0	26	0	0	1	1	0	32	0	0	0	9	0	55	0	0	0	0	0	8	0	47	0	0	0	1	0	25	0	0	0
OTU330888	0	6	0	14	0	0	0	0	0	1	0	6	0	0	5	4	0	16	0	27	3	0	4	8	39	19	0	13	0	17	0	42	0	3	1	9	0	29	0	22	0	0	0	2	0	0	0	8	0
OTUNew.CleanUp.ReferenceOTU75	4	0	40	0	108	0	4	0	0	0	0	0	0	0	0	0	1	0	0	0	0	0	0	0	0	0	0	0	0	0	2	0	0	0	0	0	4	0	98	0	18	0	0	0	0	0	0	0	0
OTU2847582	1	0	20	0	13	6	12	0	2	0	5	0	1	11	3	0	60	2	11	0	0	30	2	24	0	1	60	0	18	0	11	0	14	3	20	0	16	0	4	0	6	0	3	0	0	0	0	0	1
OTUNew.CleanUp.ReferenceOTU610	3	0	6	0	26	4	0	2	3	0	1	0	1	0	0	1	1	0	0	2	3	4	2	4	0	0	8	0	3	0	0	0	8	0	0	7	19	3	22	2	11	2	12	18	0	0	10	2	5
OTUNew.ReferenceOTU166	0	0	0	25	0	1	0	0	3	0	0	3	0	0	8	43	14	19	0	4	9	16	99	0	24	7	0	5	0	17	0	4	0	3	0	2	0	4	0	0	0	0	0	0	0	1	0	0	0
OTUNew.CleanUp.ReferenceOTU845	1	0	1	0	2	8	2	2	42	0	13	1	43	1	0	0	1	1	0	0	1	1	0	0	0	1	4	7	0	2	0	0	7	2	1	0	6	7	2	1	0	2	2	19	0	0	3	1	7
OTUNew.CleanUp.ReferenceOTU252	0	0	4	0	14	0	3	3	5	0	1	0	5	0	0	0	1	0	4	0	4	16	0	3	0	1	42	0	2	1	0	0	31	0	1	1	31	1	4	1	2	1	12	10	0	1	22	0	4
OTU550168	4	4	50	2	46	8	19	4	2	2	4	1	7	7	2	0	15	0	14	0	6	22	1	17	3	2	34	4	4	0	3	0	8	0	1	4	14	2	13	0	9	0	6	0	0	0	0	0	1
OTUNew.ReferenceOTU519	3	0	21	0	11	2	3	2	1	1	0	0	0	0	1	1	0	0	3	0	0	17	2	2	1	0	15	2	4	0	1	0	34	0	6	3	72	1	86	0	42	0	7	0	0	0	0	0	10
OTU330714	21	17	1	18	0	20	7	45	6	6	0	56	0	1	4	27	2	2	0	4	0	1	14	0	6	4	0	28	0	2	0	0	1	12	0	5	2	0	0	1	0	0	0	0	0	2	1	7	2
OTU1640195	0	0	0	4	0	0	0	0	0	16	0	0	0	0	0	0	0	0	0	0	0	0	0	0	0	0	0	0	0	0	0	0	0	0	0	0	6	0	1	0	0	0	0	0	0	0	0	0	2
OTUNew.CleanUp.ReferenceOTU98	0	3	0	19	0	0	0	1	0	34	0	9	0	0	1	2	0	15	0	25	0	0	37	0	37	10	1	2	0	16	0	8	0	1	0	0	0	19	0	7	0	2	0	27	0	4	0	5	0
OTUNew.CleanUp.ReferenceOTU530	2	13	10	3	18	4	8	2	2	10	9	12	0	11	1	5	73	8	3	3	0	24	0	9	0	8	47	0	13	0	8	1	3	0	16	4	11	0	5	0	2	0	3	0	0	0	0	2	4
OTU4313823	0	0	0	0	0	0	0	0	0	0	0	0	0	0	0	0	0	0	0	0	1	0	0	0	0	0	0	0	0	0	0	0	0	0	0	0	0	0	0	0	0	1	3	0	0	15	36	0	0
OTU37234	0	0	0	3	0	0	0	0	0	0	0	0	0	0	0	0	0	19	0	5	0	0	0	0	0	20	0	0	0	0	0	68	0	0	0	1	0	12	0	93	0	1	0	1	0	19	0	5	0
OTU304260	1	12	0	16	0	0	0	27	0	3	0	8	0	0	0	5	0	18	0	12	0	0	6	0	3	26	0	1	0	8	0	9	0	0	4	5	0	12	0	52	0	2	0	5	0	8	0	0	0
OTUNew.ReferenceOTU343	4	1	0	0	8	1	1	12	1	0	2	0	2	0	6	0	1	3	0	1	17	10	1	0	3	3	6	0	5	2	0	2	3	4	4	25	15	15	10	8	7	0	0	44	0	0	25	1	2
OTUNew.CleanUp.ReferenceOTU78	0	0	1	0	14	126	82	28	83	2	12	0	2	3	5	0	3	0	0	0	0	13	0	0	0	0	0	0	0	0	0	0	0	3	0	0	0	0	0	0	0	0	0	0	0	0	0	0	0
OTU8958	9	5	0	9	0	1	0	5	195	1	9	7	13	0	16	1	0	2	0	10	0	0	2	0	5	3	0	0	0	9	0	1	0	0	0	2	0	0	0	6	0	0	0	0	0	7	0	0	0
OTU4388963	0	0	0	0	0	0	0	0	0	0	0	0	0	0	0	0	0	0	0	0	0	0	0	0	0	0	0	0	0	0	0	0	0	0	0	0	0	0	0	0	0	0	0	0	0	0	0	0	0
OTU1110857	0	0	0	0	0	6	1	1	1	0	1	0	3	4	0	0	4	0	0	0	0	1	0	3	0	0	0	0	11	0	0	0	0	0	0	0	5	0	0	0	0	0	6	0	0	0	3	3	1
OTU1019161	6	52	0	19	0	1	0	19	0	19	0	1	0	0	1	5	0	5	0	7	0	0	39	0	10	4	0	5	0	0	0	57	0	4	0	10	0	5	0	4	0	0	0	6	0	0	0	0	0
OTU4320407	0	0	14	0	23	2	10	0	0	0	0	0	0	0	0	0	0	0	0	0	0	4	2	28	0	0	0	0	26	0	7	0	16	0	10	0	54	0	31	0	65	0	15	0	0	0	0	0	0
OTU233689	0	0	0	0	0	0	0	0	0	0	0	0	0	0	0	0	5	0	0	0	0	0	0	0	0	0	0	0	0	0	0	0	0	0	0	0	0	0	0	0	0	0	0	6	0	0	3	0	0
OTU907646	1	17	0	87	0	0	0	0	0	16	0	112	0	0	1	1	0	8	0	62	0	0	2	0	3	15	0	1	0	2	0	4	0	2	0	0	0	4	0	9	0	1	0	2	0	1	0	2	0
OTU3751007	0	18	0	13	0	0	0	0	0	2	0	37	0	0	0	4	0	62	0	16	0	0	4	0	6	50	0	2	0	11	0	19	0	0	0	1	0	20	0	18	0	1	0	0	0	11	0	0	0
OTU4126876	0	1	0	4	0	0	0	1	0	2	0	6	0	0	2	8	0	8	1	7	12	5	12	1	27	15	25	1	1	8	0	48	0	8	0	12	5	13	0	18	1	3	1	11	0	2	2	6	0
OTUNew.CleanUp.ReferenceOTU107	1	13	0	13	1	0	0	19	1	5	1	8	0	0	0	17	0	16	0	14	3	0	5	0	11	11	0	1	0	15	0	11	0	0	1	3	0	12	0	56	0	1	1	2	0	8	0	0	0
OTUNew.CleanUp.ReferenceOTU165	0	0	0	0	0	0	0	8	0	0	0	0	0	0	0	0	2	0	0	0	0	0	0	2	0	0	0	0	0	0	0	0	0	0	0	0	0	0	0	0	0	0	0	0	0	2	27	0	0
OTUNew.CleanUp.ReferenceOTU122	1	2	0	0	0	8	14	2	7	0	3	0	5	3	3	4	0	0	0	0	1	2	0	1	0	0	0	1	3	1	3	0	2	1	0	0	1	0	0	0	1	0	1	0	0	0	1	0	1
OTUNew.CleanUp.ReferenceOTU2520	0	13	0	16	2	22	3	35	93	4	19	15	15	1	15	15	2	5	0	3	0	1	3	2	49	7	0	11	0	1	0	0	0	0	2	4	0	0	0	2	0	0	0	0	0	0	0	0	0
OTU1109205	61	15	24	1	30	17	11	6	0	2	4	29	0	20	3	1	13	0	1	0	3	7	3	3	0	8	5	2	1	0	7	0	6	9	0	0	11	0	11	1	2	0	1	0	0	0	0	0	0
OTUNew.ReferenceOTU322	3	0	0	0	0	0	0	0	0	0	6	1	4	2	0	0	8	3	0	0	8	14	0	9	1	0	2	5	0	0	0	0	0	17	4	14	3	8	0	0	0	0	4	7	0	0	0	39	12
OTUNew.CleanUp.ReferenceOTU84	3	0	52	0	86	1	14	1	2	0	6	0	6	12	0	0	0	0	3	0	3	8	0	12	0	0	20	0	4	0	18	0	29	0	11	1	15	0	1	0	9	0	3	0	0	0	0	0	1
OTU795258	0	0	0	0	0	0	10	0	0	0	0	0	0	19	16	0	22	0	0	0	0	29	0	0	0	0	0	0	0	0	0	0	0	6	2	0	2	5	0	0	0	2	0	2	0	0	0	0	1
OTU549048	1	0	25	0	17	38	119	2	2	1	0	68	1	10	1	1	9	0	6	0	3	7	0	2	0	0	10	1	2	0	1	0	2	0	1	0	11	0	2	1	12	0	3	0	0	0	0	0	0
OTU233204	4	0	0	0	0	1	1	22	0	0	0	0	0	0	0	1	0	1	0	2	8	0	4	8	8	3	0	4	0	8	0	3	0	1	0	0	0	13	0	4	0	0	0	1	0	5	21	0	0
OTU573124	50	23	3	19	2	6	5	22	2	19	34	56	68	2	1	0	0	4	0	2	0	3	0	1	5	1	2	3	0	0	0	5	1	0	1	1	1	0	0	1	0	0	2	0	1	3	1	0	0
OTUNew.ReferenceOTU572	20	0	11	0	19	9	3	1	30	0	10	0	34	0	0	0	2	0	2	0	4	15	1	1	2	2	4	4	3	0	0	0	8	0	5	6	52	1	17	0	20	0	4	5	0	1	5	1	2
OTUNew.CleanUp.ReferenceOTU1409	2	2	46	4	32	6	13	0	6	1	1	0	8	4	2	0	7	1	14	1	3	19	0	3	3	2	16	1	7	1	10	0	5	0	1	8	36	2	12	0	23	0	6	1	0	0	1	0	2
OTU4294811	0	0	0	1	0	0	0	1	0	0	0	0	0	0	1	0	0	1	0	0	146	1	29	2	9	5	0	4	0	1	0	7	0	33	1	95	2	8	0	2	0	0	0	0	0	0	0	1	0
OTU232909	0	10	0	37	0	0	0	0	0	31	0	14	0	0	0	23	0	38	0	34	5	0	10	0	5	34	0	1	0	0	0	2	0	0	0	0	0	7	0	32	0	0	0	0	0	6	0	4	0
OTU354401	2	0	6	0	2	1	15	0	1	0	0	0	1	0	1	0	0	0	0	0	0	10	0	19	0	0	2	7	58	0	41	0	48	0	14	3	26	2	7	0	2	0	36	0	1	0	0	0	29
OTU317953	8	7	0	3	0	1	1	9	0	3	0	0	0	0	21	0	0	1	0	0	90	0	1	0	25	6	0	5	0	3	0	30	0	33	11	29	0	3	0	3	0	0	0	0	0	0	0	0	0
OTUNew.CleanUp.ReferenceOTU136	7	35	3	16	8	2	8	27	37	65	0	8	0	0	0	27	0	2	0	5	16	0	17	8	30	9	1	11	4	2	0	0	0	0	0	0	0	0	0	0	0	0	0	0	0	0	0	0	0
OTU314752	0	0	8	0	3	0	4	0	0	0	0	0	0	0	0	0	0	0	0	0	0	5	0	42	0	0	0	1	92	0	28	0	28	0	5	0	17	0	20	0	1	0	27	0	1	0	0	1	12
OTUNew.CleanUp.ReferenceOTU231	0	0	0	0	0	0	0	0	0	0	0	0	0	0	0	0	2	0	0	1	0	3	0	0	0	0	0	0	0	0	0	0	3	0	3	0	3	0	1	0	0	0	0	0	0	0	6	0	1
OTU1601703	0	0	0	0	0	0	0	0	0	0	0	0	0	0	0	1	0	0	0	0	0	0	0	0	0	0	0	0	0	8	0	27	0	0	0	0	0	1	0	29	0	0	0	0	0	20	4	2	0
OTU688826	3	0	0	0	18	5	9	9	52	0	38	0	26	6	1	0	6	0	1	0	2	8	3	17	1	0	0	14	2	1	2	0	4	0	2	0	5	2	4	1	0	0	9	14	1	0	5	2	5
OTU534346	1	1	4	0	8	0	5	7	38	0	54	0	29	3	0	2	12	2	3	0	2	35	3	10	22	3	19	10	8	0	3	0	1	0	0	3	7	2	6	0	17	0	10	0	0	0	2	7	3
OTUNew.ReferenceOTU155	0	3	0	3	0	0	5	8	0	0	0	0	0	0	0	25	0	5	2	15	2	2	15	0	8	1	0	4	0	6	0	1	0	0	0	0	0	11	0	0	0	0	1	0	0	0	0	1	0
OTUNew.ReferenceOTU218	0	0	0	0	0	0	0	0	0	0	0	0	0	0	1	0	0	0	0	1	0	0	0	0	0	0	0	0	0	0	0	0	0	0	0	0	0	0	0	0	0	0	0	0	0	0	0	0	0
OTU807901	0	0	8	0	9	19	43	0	0	0	0	0	0	0	0	0	0	0	0	0	0	12	0	6	0	0	2	1	6	0	19	0	10	1	3	0	25	0	16	0	4	0	13	0	0	0	0	0	5
OTUNew.ReferenceOTU610	0	0	0	0	0	0	0	2	0	0	0	0	2	0	0	0	1	1	2	0	0	0	0	1	0	0	3	0	0	0	0	0	2	0	0	0	0	0	0	0	0	4	6	9	0	0	0	0	0
OTU227965	0	0	0	0	0	0	0	0	0	0	0	0	0	0	0	0	0	0	0	0	0	0	0	0	0	0	0	0	0	0	1	0	0	0	0	0	0	0	0	0	0	0	0	0	0	0	5	0	0
OTU101498	0	102	0	47	0	0	0	0	0	69	0	94	0	0	0	0	0	14	0	12	0	0	0	0	0	7	0	0	0	0	0	0	0	0	0	0	0	0	0	2	0	0	0	0	0	0	0	0	0
OTUNew.ReferenceOTU593	0	7	0	4	0	0	0	0	0	5	0	0	0	0	0	18	0	5	0	2	9	8	49	1	67	0	1	14	0	19	0	1	0	15	8	46	7	5	0	0	0	0	0	0	0	0	0	0	0
OTU240357	0	0	0	0	0	0	0	42	0	0	0	4	1	0	0	4	0	31	0	16	0	0	15	0	15	10	0	4	0	40	0	18	0	2	0	0	0	27	0	13	0	8	0	0	0	12	0	0	0
OTU121667	0	7	0	124	0	0	0	0	0	19	0	157	0	0	0	0	0	4	0	18	1	0	0	0	0	15	0	0	0	0	0	0	0	0	0	0	0	0	0	1	0	0	0	0	0	0	0	0	0
OTUNew.CleanUp.ReferenceOTU93	0	0	25	0	28	2	3	0	0	0	0	0	0	0	0	0	0	0	0	0	0	6	0	6	0	0	11	0	9	0	8	0	17	0	0	0	21	0	10	0	130	0	0	0	0	0	0	0	0
OTU1117799	0	0	4	0	20	3	20	0	0	0	0	0	0	0	0	0	0	0	1	0	0	0	0	0	0	0	21	0	0	0	5	0	3	0	0	0	12	0	46	0	205	0	0	0	0	0	0	0	0
OTUNew.ReferenceOTU261	11	6	0	0	0	0	0	2	0	0	0	0	0	0	0	4	0	5	2	5	1	6	3	5	5	1	14	1	0	0	0	0	0	3	5	0	1	8	0	18	0	1	0	12	0	0	0	4	3
OTUNew.CleanUp.ReferenceOTU96	0	0	0	0	3	1	0	0	0	0	0	0	0	0	0	0	13	0	0	0	0	4	0	0	0	0	2	0	2	0	1	0	13	0	0	0	16	0	22	3	259	0	0	0	0	0	0	0	0
OTU342789	0	3	0	0	0	0	0	7	0	2	0	6	0	0	2	0	3	1	0	5	0	0	10	0	4	6	0	0	0	7	0	30	2	0	0	0	0	1	0	56	0	1	0	4	0	8	4	0	0
OTUNew.CleanUp.ReferenceOTU497	9	3	0	3	7	6	2	12	5	0	1	0	3	3	2	0	5	2	1	1	1	9	0	2	0	4	9	1	4	0	0	0	8	0	8	1	27	1	8	3	1	5	8	5	0	1	0	0	10
OTUNew.CleanUp.ReferenceOTU261	0	20	0	39	0	0	0	3	2	13	0	26	0	0	0	19	0	43	0	54	0	0	6	0	8	12	0	3	0	0	0	21	0	0	1	0	0	5	0	18	0	9	0	2	0	8	0	0	0
OTU520995	6	3	3	1	10	0	1	21	3	3	0	2	1	3	62	15	2	1	1	2	26	11	7	14	9	2	7	4	2	0	1	3	7	27	3	38	26	0	6	1	3	0	0	0	0	0	0	0	0
OTUNew.CleanUp.ReferenceOTU90	215	24	0	16	0	9	2	11	0	0	0	3	0	4	39	12	0	1	0	0	0	0	0	0	0	0	0	0	0	0	0	0	0	2	2	0	0	0	0	0	0	0	0	0	1	0	0	1	0
OTU265874	0	39	0	43	0	0	0	12	0	49	0	54	0	0	26	58	0	9	0	29	0	0	14	0	3	5	0	0	0	0	0	0	0	0	0	0	0	0	0	0	0	0	0	0	0	0	0	0	0
OTU27569	11	59	0	29	0	0	0	12	0	8	0	57	0	0	0	23	0	28	0	24	2	2	5	0	2	24	0	3	0	3	0	22	0	2	3	2	0	7	0	9	0	0	0	0	0	2	0	0	0
OTUNew.ReferenceOTU537	0	1	0	0	0	0	0	0	0	6	0	15	0	0	2	0	0	5	0	4	82	0	23	0	10	3	0	9	0	1	0	0	0	53	0	100	0	10	0	0	0	0	0	3	0	0	0	0	0
OTU344473	0	1	0	0	0	0	0	0	0	0	0	0	0	0	0	0	0	0	0	0	0	0	0	0	0	0	0	0	0	0	0	0	0	0	0	0	12	0	1	0	0	0	0	0	0	0	0	0	0
OTUNew.ReferenceOTU473	2	0	0	0	0	8	0	12	141	0	54	1	45	6	5	0	2	0	0	0	1	0	3	4	1	1	1	2	0	1	0	1	0	0	0	2	1	0	0	0	0	0	0	0	0	0	1	0	0
OTUNew.CleanUp.ReferenceOTU2009	0	2	2	0	2	26	14	8	117	0	42	2	53	19	9	2	7	0	0	0	4	7	2	0	1	0	0	1	1	0	0	0	0	3	3	0	1	1	0	0	0	0	0	0	0	0	0	0	0
OTUNew.CleanUp.ReferenceOTU129	2	0	70	0	38	30	135	1	0	0	0	0	0	1	0	0	4	0	9	0	0	18	0	0	0	0	12	0	0	0	1	0	1	0	0	0	0	0	0	0	0	0	0	0	0	0	0	0	0
OTUNew.ReferenceOTU206	2	0	7	1	10	13	17	0	1	3	0	0	0	1	0	4	10	2	9	1	3	10	2	10	2	3	13	17	16	0	9	0	27	8	9	8	21	3	18	1	18	1	41	1	0	0	0	4	3
OTU536678	0	0	13	0	3	8	100	0	2	0	0	0	0	0	0	0	0	0	6	0	1	25	0	0	0	0	26	1	6	0	8	0	22	0	1	0	7	0	33	1	61	0	6	0	0	0	0	0	0
OTUNew.CleanUp.ReferenceOTU1121	1	1	0	2	4	0	0	3	41	1	9	0	16	1	3	2	0	0	0	1	0	2	0	0	0	1	6	0	0	0	0	0	0	0	0	0	2	6	0	2	0	3	3	13	0	1	15	1	1
OTU358538	0	0	2	0	0	1	7	0	13	0	34	0	37	0	0	0	3	0	0	0	0	3	0	4	0	0	0	1	2	0	0	0	2	0	0	0	4	0	4	0	0	0	6	2	0	1	2	2	0
OTU4345420	0	3	0	0	0	8	0	20	4	0	0	0	3	1	28	0	3	2	1	15	14	36	2	4	11	5	0	4	0	3	0	9	0	9	36	44	16	7	0	1	0	0	15	0	0	1	0	5	0
OTUNew.CleanUp.ReferenceOTU256	0	0	0	0	1	0	1	0	0	0	0	0	0	0	0	0	0	0	1	0	0	3	0	0	0	0	8	0	0	0	0	0	2	0	0	0	0	0	3	0	1	1	3	1	0	1	9	0	0
OTU830400	0	2	0	61	0	0	0	0	1	4	0	100	1	0	0	0	0	2	0	155	0	0	0	0	0	4	0	0	0	0	0	0	0	0	0	0	1	1	1	0	0	0	0	0	0	0	0	0	0
OTUNew.ReferenceOTU306	0	0	0	0	0	2	4	2	0	0	0	0	1	4	0	1	7	0	0	0	1	22	1	7	0	0	0	3	32	0	0	0	0	0	52	0	0	0	0	1	0	0	7	0	1	0	0	0	3
OTU3844519	0	0	10	0	16	2	9	2	4	0	2	13	8	7	5	1	6	0	4	0	1	5	1	26	0	0	7	1	27	0	9	1	23	2	10	1	15	0	18	0	26	0	6	0	0	0	4	4	1
OTUNew.ReferenceOTU346	8	16	0	16	0	0	0	23	0	0	0	4	0	0	4	9	0	13	0	9	0	2	8	0	5	14	0	2	0	20	0	60	0	0	0	9	0	12	0	37	0	1	0	0	0	5	1	1	1
OTUNew.CleanUp.ReferenceOTU2332	2	49	0	38	0	1	0	10	0	6	0	51	0	0	1	12	0	20	0	26	3	0	4	0	2	9	0	0	0	4	0	25	0	1	0	4	0	15	0	26	0	7	0	5	0	1	0	1	0
OTU4326669	3	14	0	23	0	0	0	12	0	22	0	40	0	0	11	51	0	26	0	16	0	0	28	0	7	25	0	0	0	10	0	23	0	0	0	0	0	5	0	4	0	0	0	0	0	6	0	0	0
OTU245550	17	3	0	0	0	7	0	49	0	1	0	0	0	3	1	2	2	1	0	1	8	0	6	0	4	3	2	2	0	4	1	1	0	0	0	5	0	5	0	3	0	1	0	0	0	2	1	0	0
OTUNew.ReferenceOTU219	0	0	11	0	15	2	7	1	0	0	0	0	0	0	0	0	0	0	0	0	3	19	0	4	0	0	6	1	4	0	2	0	17	0	7	0	81	0	72	0	31	0	11	0	0	0	0	0	2
OTUNew.CleanUp.ReferenceOTU97	0	0	26	0	42	20	31	1	1	0	0	0	0	25	1	0	46	0	5	0	0	30	0	0	0	0	16	2	2	0	7	0	10	0	0	0	9	1	7	0	7	0	2	0	0	0	0	1	3
OTU232341	0	2	0	0	2	5	4	0	15	0	16	0	30	0	0	0	9	0	2	0	2	17	3	4	1	0	0	2	11	0	0	0	2	0	0	0	3	0	0	0	2	1	20	0	0	0	5	2	1
OTU259136	2	0	23	0	23	3	11	0	0	0	0	0	0	11	2	0	36	2	15	0	0	13	2	21	0	0	38	0	7	0	17	0	28	0	30	0	9	0	11	0	2	0	1	0	0	0	1	0	2
OTU844663	0	1	0	72	0	0	0	0	0	22	0	199	0	0	0	0	0	3	0	26	0	0	0	0	2	5	0	0	0	0	0	0	0	0	0	0	0	0	0	0	0	0	0	0	0	0	0	0	0
OTU344179	2	3	0	16	0	0	0	17	2	0	1	5	0	0	4	11	1	24	0	12	2	0	6	0	14	22	0	1	0	6	0	26	0	1	0	1	0	6	0	27	0	5	0	5	0	3	0	0	0
OTU135262	0	5	0	7	3	0	0	1	94	7	5	0	23	0	0	5	0	12	0	17	0	0	3	3	12	14	0	4	1	10	0	44	4	2	0	0	0	5	0	4	0	0	1	0	0	1	1	4	0
OTU823937	0	0	0	0	0	0	0	0	0	0	0	0	0	0	0	3	0	6	0	1	7	1	13	32	55	8	0	15	0	37	0	37	0	1	0	10	0	15	0	10	0	0	0	0	0	2	0	0	0
OTU677535	1	0	19	1	19	1	19	0	4	0	0	0	1	31	5	0	34	0	14	0	0	30	0	16	0	0	28	0	8	0	4	0	19	0	22	0	5	0	5	0	0	0	1	0	0	0	0	0	3
OTUNew.ReferenceOTU396	1	11	0	5	0	0	0	29	3	9	6	20	22	12	0	9	6	23	0	2	5	17	15	2	45	6	0	2	0	10	0	25	0	0	0	6	1	9	0	3	0	0	0	0	0	1	1	0	0
OTUNew.CleanUp.ReferenceOTU139	1	2	0	0	0	0	0	0	0	0	0	0	1	0	1	17	1	3	0	5	0	0	23	0	0	9	0	1	0	19	0	2	0	1	0	0	0	7	0	3	0	0	0	0	0	6	0	0	0
OTU786099	0	0	0	0	0	0	31	0	13	0	0	0	17	32	2	0	43	0	6	0	0	73	0	1	0	0	4	0	25	0	11	0	0	0	9	0	1	0	0	0	0	0	3	0	0	0	0	2	4
OTUNew.CleanUp.ReferenceOTU1744	1	0	0	0	0	0	0	0	145	0	25	0	42	1	0	0	0	1	0	0	0	0	0	0	0	0	0	3	0	0	0	0	0	0	0	0	0	0	0	0	0	0	3	7	0	0	3	0	3
OTU563192	2	0	0	0	0	0	0	0	0	0	0	0	0	0	0	0	0	0	0	0	0	0	0	0	0	0	0	0	0	0	0	0	0	0	0	0	0	0	0	0	0	0	0	0	0	0	0	0	0
OTU530315	0	0	0	0	0	14	16	3	0	0	0	0	0	1	0	0	0	0	0	0	37	9	0	9	0	0	0	1	12	0	0	0	0	28	1	0	0	5	0	0	0	0	0	0	0	0	0	0	0
OTU326155	0	2	1	0	0	2	0	3	0	0	0	0	0	0	14	1	0	2	5	3	0	0	2	0	0	1	0	0	0	0	0	0	0	0	0	3	0	0	0	27	0	2	3	2	0	2	22	0	0
OTUNew.CleanUp.ReferenceOTU111	2	0	46	4	92	0	26	4	0	0	0	0	0	0	0	0	0	0	0	0	0	3	0	2	0	0	11	0	0	0	0	0	0	0	1	0	0	0	19	0	61	0	1	0	0	0	0	0	0
OTU797310	0	0	5	0	0	21	64	0	0	0	0	0	0	0	0	0	0	0	9	0	0	35	0	1	0	0	7	0	7	0	12	0	16	0	12	1	39	1	41	0	4	0	8	0	1	0	0	0	7
OTU338986	5	0	0	0	0	0	0	9	0	1	0	0	0	0	2	0	0	1	0	0	0	0	1	0	2	4	0	0	0	2	0	1	0	0	2	0	0	4	0	7	0	6	2	15	0	5	4	2	0
OTU163961	2	0	28	0	39	2	12	1	2	0	0	0	2	2	0	0	4	0	5	0	0	4	0	2	0	0	6	1	14	0	22	1	12	0	11	2	18	0	41	1	27	0	4	0	0	0	0	0	2
OTUNew.CleanUp.ReferenceOTU115	0	1	0	0	0	0	0	2	0	0	7	0	0	25	0	12	11	0	8	0	3	36	0	6	6	0	0	9	1	0	0	0	9	12	6	0	10	0	7	0	1	1	40	1	0	0	0	87	11
OTU940971	0	19	0	0	0	0	0	8	0	7	2	10	3	15	13	43	11	6	0	4	6	11	26	0	5	5	0	0	0	6	0	14	0	0	0	0	0	9	0	0	0	0	0	0	0	1	0	2	0
OTU125125	0	18	1	98	0	0	0	0	0	8	0	71	0	0	0	0	0	12	0	87	0	0	2	0	1	16	0	0	0	0	0	0	0	0	0	0	0	0	0	1	1	0	0	0	0	0	0	0	0
OTUNew.ReferenceOTU417	0	2	6	12	6	0	4	1	0	0	1	7	0	3	5	3	19	2	20	0	2	13	7	7	3	0	50	5	8	1	18	0	9	7	7	3	15	0	24	0	41	0	3	0	0	0	0	1	0
OTUNew.CleanUp.ReferenceOTU91	1	67	0	36	0	1	0	6	0	85	0	67	0	0	2	8	1	4	0	6	1	0	1	0	1	22	0	0	0	2	0	3	0	1	0	1	0	0	0	0	0	0	0	1	0	0	0	0	0
OTU4319491	2	0	10	0	29	19	17	7	38	9	15	3	6	9	3	2	52	1	0	0	3	14	4	1	1	2	6	2	3	1	0	0	0	0	1	0	1	0	2	3	1	1	1	1	0	0	0	0	0
OTUNew.CleanUp.ReferenceOTU156	0	0	0	0	0	0	0	0	0	0	0	0	0	0	0	0	0	1	0	0	0	0	0	0	0	0	0	0	0	0	0	0	0	0	0	0	0	0	0	0	0	0	1	0	0	0	0	0	2
OTU4470885	2	0	4	2	2	4	55	3	1	1	2	0	0	10	1	2	37	0	0	0	0	69	1	5	1	0	0	1	2	0	9	0	14	0	1	0	38	1	15	0	16	0	8	0	0	0	0	1	3
OTUNew.ReferenceOTU323	0	0	13	0	7	0	83	0	0	0	0	0	0	2	0	0	3	0	8	0	2	115	0	0	0	1	0	0	3	0	5	0	0	0	6	0	0	0	15	0	0	0	1	0	0	0	0	0	1
OTUNew.ReferenceOTU438	0	0	5	0	19	0	2	0	3	0	8	0	0	9	0	0	9	0	19	0	0	12	0	38	0	1	70	0	30	0	10	0	23	1	5	0	14	0	11	0	3	0	1	0	0	0	1	0	0
OTU1107788	0	0	0	0	0	28	0	1	1	0	0	0	0	0	0	0	0	0	0	0	1	0	2	1	0	0	0	0	0	0	0	0	0	0	0	0	2	0	0	0	0	19	3	31	0	2	13	0	0
OTUNew.CleanUp.ReferenceOTU1522	0	0	0	0	0	4	2	0	137	0	50	0	95	2	0	1	0	0	0	0	0	0	0	0	0	0	0	0	0	0	0	0	0	0	0	1	0	0	0	0	0	0	0	0	0	0	0	0	0
OTUNew.CleanUp.ReferenceOTU1139	7	3	8	0	26	2	7	2	17	2	14	0	15	0	1	2	0	1	0	0	5	5	1	5	0	1	6	6	2	0	0	0	5	0	4	2	45	7	8	0	6	0	1	12	0	0	3	0	1
OTU4427546	7	20	0	30	0	4	0	21	15	0	0	96	0	2	1	0	1	21	0	3	3	0	6	0	0	10	0	3	0	2	0	0	0	3	0	0	0	2	0	12	0	1	0	0	0	2	1	3	0
OTU4323516	1	0	0	0	4	0	0	0	15	0	16	2	39	8	5	2	6	0	6	0	2	5	3	19	0	0	4	0	7	0	0	0	6	0	1	0	8	0	4	0	3	0	12	1	0	0	10	2	1
OTUNew.CleanUp.ReferenceOTU442	0	0	9	0	11	0	5	0	0	0	0	0	0	0	0	0	0	0	0	0	2	15	0	0	0	0	10	0	6	0	2	0	25	0	4	0	70	0	74	0	38	0	8	0	0	0	0	0	5
OTUNew.CleanUp.ReferenceOTU106	0	10	0	5	0	3	0	21	44	1	10	12	63	0	2	11	0	13	0	6	25	1	5	0	36	7	0	1	0	7	0	0	0	2	0	11	1	8	0	0	0	0	0	0	0	0	0	5	0
OTUNew.CleanUp.ReferenceOTU1900	1	10	10	1	11	15	15	1	2	1	0	0	0	4	4	8	8	4	1	0	3	22	4	3	1	1	14	3	3	6	18	0	24	12	6	3	11	1	3	0	36	0	12	0	3	0	0	8	3
OTU112337	0	6	0	7	0	0	0	5	0	9	0	8	0	0	3	5	0	7	0	8	1	0	48	0	66	13	0	9	0	1	0	33	0	5	4	11	0	7	0	2	0	0	0	9	0	2	0	0	0
OTU533202	0	3	0	12	0	0	0	6	0	4	0	13	0	0	0	27	0	35	0	20	8	0	8	0	2	24	0	2	0	19	0	7	0	0	0	0	0	10	0	51	0	0	0	0	0	5	0	0	0
OTUNew.CleanUp.ReferenceOTU89	4	9	0	6	0	0	0	99	0	3	0	0	0	1	0	4	0	1	0	3	16	3	10	0	15	5	0	6	0	13	0	0	0	6	0	0	0	7	0	58	0	2	0	8	0	8	0	0	0
OTU824991	6	21	0	44	0	3	0	21	0	8	0	18	0	0	7	11	0	17	1	18	12	0	7	0	5	11	0	0	0	5	0	3	0	7	1	35	1	3	0	5	0	6	0	5	0	2	0	2	0
OTU814435	3	0	1	0	3	8	23	1	0	0	0	0	0	15	0	0	31	0	1	0	1	42	0	4	0	0	2	0	37	0	11	0	18	0	48	0	7	3	20	0	0	0	3	0	0	0	0	0	2
OTU642508	0	0	6	0	10	20	106	1	2	0	0	0	0	0	0	1	1	0	0	0	1	16	0	2	0	0	8	8	6	0	10	0	7	0	2	0	19	0	41	0	16	0	10	0	0	0	0	0	4
OTU247781	13	0	0	3	0	6	0	37	0	0	0	0	10	9	17	1	5	2	5	1	5	4	18	7	10	0	2	0	0	0	0	0	0	2	24	86	17	6	0	0	0	0	1	4	0	0	0	2	1
OTUNew.ReferenceOTU344	0	4	3	0	6	16	42	0	0	0	0	0	1	0	0	0	2	1	0	0	0	6	0	1	0	0	10	4	6	0	18	0	30	0	4	0	2	0	18	0	45	0	15	0	0	0	0	0	4
OTUNew.CleanUp.ReferenceOTU155	1	10	0	0	0	0	0	0	0	0	0	0	0	0	2	0	0	0	0	0	146	6	16	0	2	0	0	1	0	0	0	0	0	66	3	6	0	6	0	0	0	0	0	17	0	0	0	6	0
OTU137005	0	40	0	31	0	0	0	0	0	57	0	87	0	0	0	14	0	8	0	58	0	0	0	0	4	4	0	0	0	0	0	0	0	0	0	3	0	0	0	0	0	0	0	0	0	0	0	0	0
OTUNew.CleanUp.ReferenceOTU557	2	4	0	1	0	0	0	3	0	0	0	0	0	0	7	0	0	0	0	1	116	1	4	0	13	0	0	0	0	2	0	5	0	27	2	88	1	7	0	3	0	0	0	0	0	0	0	1	0
OTU1701855	2	2	0	1	0	0	1	3	0	0	0	0	0	1	16	17	0	15	0	4	2	4	37	2	17	4	0	1	24	15	0	27	0	11	18	3	1	17	0	2	0	0	0	2	0	1	1	3	0
OTUNew.ReferenceOTU288	0	18	0	28	0	0	0	2	0	10	0	3	0	0	0	4	0	15	0	25	0	0	4	0	3	7	1	0	0	2	0	34	0	0	0	0	0	6	0	43	0	0	0	0	0	17	0	0	0
OTUNew.CleanUp.ReferenceOTU574	5	12	0	3	1	1	0	5	18	0	2	0	1	2	0	0	0	3	0	2	3	0	13	0	2	2	0	9	0	5	0	0	0	0	0	1	0	4	0	7	0	19	1	42	0	2	3	3	0
OTU610287	4	10	0	5	0	0	1	8	0	7	0	4	0	1	0	13	5	11	0	38	0	1	1	1	8	3	0	0	5	6	0	21	0	1	3	4	0	17	2	36	0	1	0	10	0	1	0	2	0
OTUNew.ReferenceOTU592	13	16	0	2	0	0	0	72	0	2	0	0	0	0	146	0	0	0	0	0	3	1	0	0	0	0	0	0	1	0	0	0	0	18	12	17	0	0	0	0	0	0	0	0	0	0	0	0	0
OTUNew.CleanUp.ReferenceOTU886	4	13	0	7	0	22	0	5	7	4	0	0	0	5	0	13	0	5	0	1	3	4	4	4	17	5	1	2	0	3	0	16	0	8	1	1	0	2	0	2	0	6	0	10	0	8	14	0	0
OTU342325	0	0	13	0	4	3	14	2	3	0	0	0	0	0	0	0	12	0	1	7	0	1	0	0	0	0	5	4	3	0	5	0	17	0	0	0	22	3	58	0	116	0	5	0	0	0	0	0	1
OTU355710	1	3	0	7	0	0	0	28	0	0	0	10	0	0	0	9	0	21	0	22	4	3	10	1	25	6	0	2	0	7	0	3	0	10	0	1	0	2	0	13	0	0	0	5	0	1	0	1	0
OTUNew.ReferenceOTU515	2	0	1	0	17	1	3	0	3	0	0	0	0	0	0	0	0	0	0	0	1	15	0	0	0	0	14	0	3	0	0	0	42	0	2	0	32	0	64	0	57	0	6	0	0	0	0	0	4
OTUNew.ReferenceOTU388	0	0	0	0	2	6	3	1	75	0	48	0	42	2	19	4	41	0	2	0	0	2	3	7	0	0	0	20	0	0	0	0	0	0	0	0	1	0	0	0	0	0	0	5	0	1	0	1	0
OTUNew.CleanUp.ReferenceOTU311	6	12	0	6	3	0	0	24	0	3	0	7	0	0	4	2	0	3	0	4	33	9	2	1	1	5	3	0	0	0	0	0	1	5	4	92	8	2	2	15	3	3	0	6	0	2	0	2	1
OTU588983	0	5	0	0	0	0	0	2	0	0	0	0	0	0	0	2	0	12	0	3	4	0	8	0	3	7	0	1	0	3	0	1	0	0	0	0	0	8	0	19	0	5	0	5	0	22	0	4	0
OTU91270	6	0	17	0	29	5	3	0	0	9	0	0	0	5	0	3	0	3	5	0	0	0	0	0	0	0	6	0	0	0	4	0	3	0	1	0	20	0	83	0	84	0	1	0	0	0	0	0	4
OTUNew.CleanUp.ReferenceOTU103	0	0	0	0	0	0	0	0	0	0	0	0	0	2	12	26	0	0	0	0	11	1	1	0	22	0	0	3	0	7	0	0	0	109	10	62	3	8	0	0	0	0	0	5	0	0	0	14	0
OTU557369	2	7	0	6	0	0	0	0	0	3	0	12	0	0	0	2	0	5	0	14	2	1	0	3	1	3	0	0	0	2	0	0	0	0	0	0	0	1	0	0	0	0	0	1	0	1	3	0	0
OTUNew.CleanUp.ReferenceOTU290	0	0	142	0	132	0	0	0	0	0	0	0	0	0	0	0	0	0	0	0	0	0	0	0	0	0	0	0	0	0	0	0	0	0	0	0	0	0	0	0	0	0	0	0	0	0	0	0	0
OTU4414549	2	59	0	35	0	0	0	13	0	12	0	27	0	0	2	12	0	5	0	14	2	0	6	0	3	19	0	0	0	5	0	24	0	5	0	1	0	11	0	8	0	3	0	6	0	8	0	3	0
OTU250749	0	0	0	2	0	0	0	1	0	1	27	0	0	34	8	13	36	12	1	3	1	14	5	6	8	3	6	12	6	2	10	0	4	1	9	2	3	7	0	2	0	0	12	1	2	0	0	21	5
OTUNew.ReferenceOTU518	2	1	19	0	36	0	4	0	3	1	7	0	2	0	2	0	2	3	7	0	0	11	1	2	0	0	34	0	10	0	2	0	35	2	6	3	34	0	16	0	23	0	7	0	0	0	0	0	2
OTUNew.CleanUp.ReferenceOTU105	0	3	0	0	0	0	0	0	0	0	0	0	0	0	0	1	0	8	0	0	249	0	5	0	4	0	0	0	0	0	0	5	0	2	0	2	0	4	0	0	0	0	0	0	0	0	0	0	0
OTU260261	0	6	0	4	0	0	0	11	0	2	0	3	0	0	1	21	0	14	1	7	6	3	42	0	67	2	0	1	0	14	0	37	0	11	0	3	0	10	0	5	0	0	0	3	1	0	0	15	0
OTU582235	0	38	0	71	0	0	0	0	0	28	0	69	0	0	0	4	0	14	0	50	0	0	0	0	0	17	0	0	0	0	0	1	0	0	0	0	0	0	0	5	0	0	0	0	0	0	0	0	0
OTU147658	1	19	0	92	0	0	0	8	0	3	0	38	0	0	0	1	0	1	1	8	0	0	2	1	2	13	0	1	0	12	0	2	0	0	0	5	1	22	0	20	0	1	0	6	0	5	0	0	0
OTU270171	0	1	7	4	29	7	24	0	9	0	3	0	2	11	0	0	15	1	4	0	2	37	0	6	0	0	10	0	5	0	12	0	16	0	4	0	19	0	20	0	17	0	1	0	0	1	2	0	2
OTU4372720	0	6	1	8	0	2	0	7	2	0	0	21	0	0	3	8	0	54	0	39	1	0	0	0	11	23	0	0	2	17	0	11	0	0	0	0	0	9	0	18	0	1	0	2	0	4	0	0	0
OTUNew.ReferenceOTU232	2	38	0	8	0	0	0	4	0	9	0	8	0	0	5	30	0	17	0	9	0	0	8	0	6	11	0	0	0	13	0	24	0	0	0	0	0	3	0	52	0	3	0	3	0	7	0	0	0
OTUNew.CleanUp.ReferenceOTU3722	0	0	2	2	8	3	10	3	0	0	0	0	1	4	19	3	8	0	7	0	0	36	0	4	0	0	0	1	13	0	18	0	3	2	15	0	1	0	5	0	2	0	8	0	1	0	0	0	4
OTU4323373	4	3	0	0	0	11	4	0	58	7	0	5	2	0	0	0	0	2	0	0	1	1	1	1	1	0	0	38	0	0	0	0	0	0	0	4	5	5	7	0	0	1	4	1	5	0	0	0	1
OTU589064	0	2	0	13	0	0	0	0	0	2	0	6	0	0	1	3	0	28	0	43	0	0	0	0	0	34	0	4	0	9	0	3	0	0	0	0	0	1	0	58	1	0	0	0	0	23	0	0	0
OTUNew.CleanUp.ReferenceOTU157	0	0	0	0	0	0	0	0	0	0	0	0	0	0	2	0	0	0	0	0	229	0	3	0	0	0	0	0	0	0	0	0	0	42	0	17	0	0	0	0	0	0	0	0	0	0	0	0	0
OTU247890	0	0	8	0	12	0	5	0	0	0	0	0	0	0	0	0	0	0	0	0	0	2	0	3	0	0	0	2	7	0	2	0	10	1	1	1	7	0	3	0	10	0	1	0	0	0	0	0	2
OTUNew.ReferenceOTU551	0	0	0	0	0	4	0	0	6	0	6	0	2	7	0	0	9	1	1	5	3	10	0	4	0	0	0	7	0	3	0	1	0	0	0	0	6	0	0	9	0	2	1	3	0	6	0	2	3
OTU239504	0	0	0	6	0	0	0	8	2	3	3	2	0	2	3	22	5	12	2	7	19	12	38	6	20	6	0	8	0	1	0	0	0	21	8	9	0	10	0	4	0	0	5	0	0	1	0	18	1
OTU2205007	1	0	0	0	0	0	0	4	0	0	0	0	0	5	0	3	0	2	9	1	1	14	15	5	22	3	1	6	14	5	0	8	0	0	0	1	31	1	10	0	2	0	5	6	0	0	3	9	2
OTUNew.ReferenceOTU227	2	3	59	1	74	11	13	4	2	3	0	2	1	23	2	1	40	0	0	0	1	3	0	0	0	2	0	0	1	0	0	0	0	0	0	1	0	0	0	0	0	0	0	0	0	0	0	0	0
OTUNew.CleanUp.ReferenceOTU128	1	16	31	1	40	0	6	2	1	0	0	0	0	0	0	0	9	1	0	0	1	0	0	0	0	1	3	0	4	0	7	0	17	0	0	0	0	3	8	2	114	0	0	0	0	0	0	0	0
OTUNew.CleanUp.ReferenceOTU269	0	0	0	0	0	1	0	0	5	0	2	0	1	0	3	0	0	0	0	0	0	1	0	0	0	0	2	0	0	0	1	0	1	0	0	1	4	3	0	2	0	4	1	21	0	0	7	0	1
OTUNew.CleanUp.ReferenceOTU88	0	0	0	0	0	0	0	0	0	0	1	0	0	0	0	0	0	0	3	0	0	29	0	27	0	0	13	8	18	0	19	0	16	0	53	0	54	0	23	0	6	0	17	0	0	0	0	0	5
OTU647393	1	0	0	0	0	11	9	3	0	0	0	0	0	0	11	0	14	0	2	0	4	53	0	11	0	0	1	0	12	0	0	0	0	53	45	2	0	0	0	0	0	0	1	0	0	0	0	1	2
OTU240130	5	6	0	0	0	0	0	9	0	0	0	2	0	0	28	1	0	0	0	1	21	34	0	6	0	0	0	0	0	0	0	0	0	47	23	84	2	6	0	0	0	0	0	3	0	0	0	12	0
OTU787618	5	1	1	0	0	23	13	6	4	1	3	0	3	8	1	0	8	0	0	0	1	0	1	3	0	0	0	1	1	0	1	0	4	0	0	0	1	0	2	0	5	0	6	1	0	0	105	15	1
OTU4443766	0	0	0	0	0	11	0	8	67	2	15	0	17	7	19	0	0	0	0	0	5	0	2	0	15	0	0	3	0	2	0	0	0	2	0	1	0	1	0	0	0	0	0	0	0	0	1	9	1
OTU4319769	0	0	0	0	0	0	0	0	0	0	0	0	0	0	0	0	0	0	0	0	0	0	0	0	0	0	0	0	0	0	0	0	0	0	0	0	0	0	0	0	0	0	0	1	0	0	4	0	0
OTU578483	5	32	0	23	0	0	0	80	0	6	0	39	0	0	0	0	0	22	0	10	0	0	2	0	2	7	0	1	0	0	0	10	0	0	0	0	0	13	0	32	0	0	0	0	0	0	0	0	0
OTU310636	2	1	0	3	0	1	0	5	0	0	0	1	0	0	0	1	0	1	0	0	5	3	1	17	1	1	5	3	0	0	0	2	1	1	4	5	8	0	0	2	0	0	2	0	0	0	11	1	0
OTUNew.ReferenceOTU358	5	0	0	0	2	0	0	2	2	0	0	0	8	1	0	0	0	0	0	0	4	9	3	0	2	0	0	2	1	1	0	0	4	0	7	3	11	7	2	5	0	4	5	31	0	3	9	1	0
OTU4370458	13	30	0	21	0	7	3	32	17	9	9	3	5	1	10	7	2	0	1	0	17	2	5	6	11	4	2	8	0	5	1	0	0	8	1	5	3	6	3	3	4	0	0	1	1	0	3	0	0
OTUNew.ReferenceOTU121	5	5	4	0	8	12	7	1	0	0	0	0	0	0	0	0	0	5	0	0	0	5	4	17	0	0	12	0	6	1	2	5	5	7	5	13	0	9	9	4	3	1	0	6	0	3	3	3	1
OTUNew.CleanUp.ReferenceOTU102	0	0	0	0	0	0	0	0	0	0	0	0	0	0	0	0	0	0	0	0	0	0	0	0	0	0	0	0	0	0	0	0	0	0	0	0	0	0	0	0	0	0	0	0	0	0	0	0	0
OTUNew.CleanUp.ReferenceOTU87	0	0	0	0	0	7	7	0	0	0	0	0	0	1	0	0	8	0	2	0	0	3	0	0	0	0	5	2	19	0	29	3	55	0	0	0	23	2	47	0	67	0	1	0	0	0	0	1	0
OTUNew.CleanUp.ReferenceOTU181	0	0	0	0	0	22	0	1	17	0	54	0	38	6	0	0	14	0	0	2	5	0	4	0	1	0	0	41	0	2	0	0	0	0	0	0	1	0	0	0	0	0	0	0	8	0	0	1	0
OTU231774	3	13	0	0	0	0	0	21	0	3	0	0	0	0	1	4	0	1	0	15	4	2	7	1	4	5	0	3	0	0	1	8	0	1	0	0	0	10	0	19	0	2	0	9	0	2	0	0	0
OTU3488180	0	0	0	0	0	0	7	0	0	0	0	0	0	0	0	0	0	0	0	0	0	8	0	0	0	0	0	0	0	0	0	0	0	0	0	0	4	0	0	0	0	0	1	0	0	0	0	0	1
OTUNew.CleanUp.ReferenceOTU4439	0	0	0	0	0	1	2	0	2	0	0	0	16	5	0	0	5	0	7	0	0	4	0	5	0	0	4	0	15	0	6	0	3	0	2	0	2	3	0	0	4	0	20	2	0	0	45	1	5
OTUNew.CleanUp.ReferenceOTU117	0	0	16	0	34	2	67	4	0	0	0	0	0	22	6	0	18	0	4	0	0	37	0	2	0	0	3	0	1	0	1	0	4	1	7	1	1	0	1	0	0	0	1	0	0	0	0	0	0
OTUNew.CleanUp.ReferenceOTU325	14	1	4	0	5	1	0	4	4	4	5	2	18	1	0	0	1	0	1	0	6	14	1	4	0	3	8	3	8	0	0	0	8	0	16	10	63	3	5	3	5	0	6	4	0	0	2	0	2
OTUNew.CleanUp.ReferenceOTU242	1	29	0	7	0	0	0	25	0	14	0	1	0	0	23	1	0	9	0	3	28	9	7	0	0	1	0	0	0	0	0	0	0	35	10	69	0	2	0	0	0	0	0	0	0	0	0	0	0
OTU685845	0	1	0	0	0	0	0	1	0	0	0	0	0	0	0	0	0	0	0	0	0	0	0	0	0	0	0	0	0	0	0	0	0	0	0	0	0	0	0	0	0	0	0	0	0	0	0	0	0
OTU830429	0	24	0	81	0	0	0	0	0	20	0	83	0	0	0	2	0	13	0	36	0	0	0	0	0	15	0	0	0	0	0	0	1	0	0	0	0	0	0	1	0	0	0	0	0	1	0	0	0
OTU336443	0	0	0	0	0	0	0	3	0	0	0	0	0	0	0	0	0	0	0	0	0	0	0	0	0	0	0	0	0	0	0	0	0	0	0	0	0	3	0	0	0	0	0	0	0	0	3	0	0
OTUNew.CleanUp.ReferenceOTU184	0	3	0	5	0	6	0	1	105	1	6	0	6	0	0	7	0	12	0	5	1	0	1	3	9	1	2	0	0	15	0	12	0	0	0	0	0	7	0	14	0	0	0	0	0	0	4	5	0
OTU545632	0	0	0	3	0	0	7	6	0	0	0	2	0	0	0	0	0	2	0	0	0	0	0	0	0	0	0	0	1	4	0	0	0	0	9	0	0	5	0	0	7	3	0	24	0	0	2	0	0
OTU835118	3	8	0	18	0	8	0	28	0	8	0	21	0	0	3	0	0	36	0	13	22	12	11	0	21	4	0	11	0	7	0	0	0	14	12	5	0	1	0	3	0	0	0	1	0	0	0	0	0
OTU234504	0	4	0	0	0	22	0	9	1	0	1	0	0	0	1	0	0	9	0	5	2	0	0	0	2	2	0	1	0	8	0	1	0	4	0	2	0	3	0	5	0	4	1	9	0	5	6	1	0
OTU1016955	0	0	7	0	12	5	81	0	0	0	0	0	0	6	3	0	30	0	1	0	2	44	0	3	2	0	2	1	0	0	6	0	7	0	12	0	10	0	16	0	15	0	0	0	0	0	0	0	0
OTUNew.CleanUp.ReferenceOTU553	4	0	12	0	28	1	1	0	2	0	1	0	1	1	0	0	1	0	0	0	0	8	1	5	0	0	11	3	7	0	1	0	18	0	5	1	64	0	29	0	30	0	2	4	0	0	4	0	3
OTU585904	0	0	0	0	0	0	0	0	0	0	0	0	0	0	0	0	0	0	0	0	0	0	0	0	0	0	0	0	0	0	0	0	0	0	0	0	1	0	0	0	0	0	1	0	0	0	0	0	0
OTU558961	0	0	5	5	0	0	2	23	1	1	2	3	1	29	10	21	12	18	3	1	6	8	3	3	17	3	0	12	4	5	1	0	4	0	18	3	5	3	7	0	4	0	5	0	3	1	0	1	0
OTUNew.CleanUp.ReferenceOTU120	0	33	0	3	0	0	0	24	0	13	0	4	0	0	0	3	0	5	0	21	0	0	17	0	2	8	0	3	0	4	0	60	0	0	0	4	0	45	0	17	0	0	0	1	0	2	0	0	0
OTUNew.CleanUp.ReferenceOTU133	0	0	0	0	0	6	34	0	0	0	0	0	0	0	0	0	3	0	3	0	0	22	0	0	0	0	4	0	1	0	2	0	12	0	0	0	37	0	36	0	112	0	1	0	0	0	0	0	0
OTUNew.CleanUp.ReferenceOTU1210	1	0	0	0	13	5	2	0	32	0	41	0	29	2	0	0	3	0	0	0	0	7	0	1	0	0	6	9	0	0	0	0	0	0	0	0	5	0	1	0	0	0	8	8	0	0	3	1	5
OTU326649	0	0	7	0	13	18	12	1	1	0	0	0	0	5	1	0	13	0	0	0	0	23	1	3	0	0	13	3	9	0	17	0	9	0	20	0	11	0	27	0	12	0	3	0	0	0	0	0	1
OTU419752	4	7	0	4	0	1	2	15	29	2	7	0	8	0	1	0	0	0	0	4	17	0	3	0	4	0	0	3	1	2	0	1	0	4	0	6	2	0	0	2	0	0	0	2	0	2	1	3	0
OTUNew.CleanUp.ReferenceOTU522	2	3	0	1	0	3	0	17	0	1	0	0	0	0	0	1	1	4	0	4	0	0	8	0	22	2	0	2	0	3	0	0	0	0	0	0	0	18	1	5	0	0	6	17	0	1	0	5	0
OTU316184	3	0	20	0	14	3	8	4	45	1	7	0	4	33	0	0	31	0	0	0	0	22	0	5	0	0	14	0	3	0	0	0	9	1	0	0	4	0	4	0	1	0	0	0	0	0	0	0	0
OTUNew.CleanUp.ReferenceOTU207	0	0	0	0	0	1	0	14	0	0	0	0	0	2	0	0	0	0	0	0	0	1	0	0	3	0	0	0	0	0	0	0	0	0	0	0	0	4	0	4	0	2	0	0	0	1	2	1	0
OTUNew.CleanUp.ReferenceOTU3616	6	8	0	8	0	8	0	8	43	4	1	0	5	0	1	8	0	2	0	0	4	0	8	0	8	1	0	4	0	0	0	1	0	1	0	4	0	0	0	0	0	0	1	2	0	0	1	0	0
OTU210280	0	0	8	0	27	1	5	0	5	0	1	0	4	2	0	0	1	4	16	0	0	5	1	42	0	0	22	0	24	0	13	0	28	0	0	0	9	0	15	0	19	0	4	0	0	0	1	0	0
OTUNew.CleanUp.ReferenceOTU132	0	54	0	6	0	0	0	23	0	32	0	8	0	0	0	7	0	0	0	1	3	1	60	0	14	2	0	1	0	0	0	0	0	0	0	23	0	2	0	0	0	0	0	6	0	0	0	4	0
OTUNew.CleanUp.ReferenceOTU121	0	0	3	0	10	2	8	7	0	0	0	0	0	0	0	0	0	2	46	0	1	29	6	4	3	0	99	1	0	0	12	0	9	4	0	0	7	0	4	0	5	0	0	0	0	0	0	0	0
OTUNew.CleanUp.ReferenceOTU185	1	0	11	0	31	1	2	0	8	0	0	0	0	5	0	0	2	1	1	0	0	8	0	0	0	0	38	0	7	0	0	0	9	0	1	0	15	0	19	0	28	0	3	0	0	0	0	0	0
OTUNew.CleanUp.ReferenceOTU109	2	1	0	4	0	0	0	0	0	7	0	0	0	0	0	0	0	0	0	0	52	0	0	0	0	1	0	0	0	0	0	0	0	0	1	193	1	4	0	0	0	0	0	0	0	0	0	0	0
OTUNew.CleanUp.ReferenceOTU151	0	3	0	1	0	0	0	12	0	0	0	0	0	0	0	5	6	7	0	6	2	1	3	1	13	6	0	2	1	0	0	0	0	0	0	0	1	13	4	7	0	4	0	3	0	0	5	3	1
OTUNew.CleanUp.ReferenceOTU6467	1	0	15	0	8	4	17	0	11	0	3	0	5	15	4	0	43	1	1	0	0	43	0	9	0	0	6	0	2	0	0	0	0	0	24	1	0	1	0	0	0	0	6	1	0	0	1	0	9
OTUNew.CleanUp.ReferenceOTU234	0	0	14	0	6	30	47	8	1	0	0	0	0	17	2	0	12	0	3	0	14	87	0	2	0	0	3	3	0	0	0	0	0	0	0	0	2	0	0	0	0	0	13	0	1	0	0	0	1
OTUNew.CleanUp.ReferenceOTU316	6	0	0	0	0	0	0	13	0	0	0	0	0	0	17	0	0	0	0	0	105	12	3	0	0	0	0	0	0	0	0	0	0	76	6	14	0	0	0	0	0	0	0	2	0	0	0	9	0
OTUNew.CleanUp.ReferenceOTU171	3	0	0	0	3	32	32	2	41	0	41	0	25	31	2	0	30	0	0	0	3	11	0	0	5	2	0	0	0	0	0	0	0	0	1	0	0	0	0	1	0	0	0	0	0	0	0	0	0
OTUNew.ReferenceOTU272	3	1	3	0	0	6	9	1	25	0	25	0	26	2	0	1	3	0	6	0	7	7	1	2	0	0	0	28	11	0	0	0	5	3	0	13	34	0	8	0	0	0	2	1	8	0	0	0	0
OTUNew.ReferenceOTU542	0	87	0	20	0	0	0	1	0	14	0	8	0	0	0	42	0	16	0	10	0	0	5	0	1	16	0	0	0	11	0	15	0	0	0	6	0	0	0	4	0	1	0	0	0	2	0	0	0
OTUNew.CleanUp.ReferenceOTU367	3	11	0	10	0	0	0	1	0	1	0	15	0	0	1	3	0	12	0	10	0	2	1	0	0	5	0	1	0	0	0	8	0	2	0	0	0	6	0	49	0	1	0	0	0	8	0	2	0
OTUNew.CleanUp.ReferenceOTU141	0	2	0	0	0	0	0	1	0	2	0	0	0	0	0	2	0	1	0	0	0	0	6	0	15	3	0	3	0	20	0	17	0	0	0	0	0	4	0	0	0	1	0	4	0	0	0	1	0
OTUNew.CleanUp.ReferenceOTU296	1	50	0	7	0	0	0	6	0	12	0	25	0	0	0	13	0	9	0	2	0	0	0	0	48	0	0	7	0	22	0	5	0	1	0	0	0	10	0	6	0	2	0	1	0	0	0	1	0
OTUNew.CleanUp.ReferenceOTU130	0	12	0	15	0	0	0	3	0	4	0	27	0	0	0	3	0	34	0	32	0	0	4	0	0	27	0	0	0	0	0	90	0	0	0	0	0	5	0	7	0	0	0	0	0	0	0	0	0
OTU3462	0	0	0	0	0	5	6	0	3	0	1	0	0	1	0	1	5	0	0	0	0	2	0	1	2	1	0	0	7	0	2	0	1	0	3	0	0	2	0	0	2	0	5	0	0	5	6	0	0
OTUNew.CleanUp.ReferenceOTU108	12	2	0	0	2	11	12	8	11	5	2	1	2	19	17	11	2	0	2	0	22	2	5	3	5	0	3	54	0	0	0	0	0	5	6	19	1	0	3	0	5	0	5	0	4	0	0	1	0
OTUNew.CleanUp.ReferenceOTU421	2	0	6	0	24	1	4	0	0	0	2	0	4	0	0	0	2	0	3	0	7	8	1	7	1	0	26	0	1	0	2	0	10	0	3	2	18	3	15	2	4	1	1	4	0	0	6	1	5
OTUNew.CleanUp.ReferenceOTU235	2	0	0	0	0	96	0	9	61	0	67	0	3	0	1	1	3	0	0	0	0	1	0	6	0	0	0	3	0	0	0	0	0	0	0	0	0	0	0	0	0	0	0	0	1	0	0	2	0
OTUNew.CleanUp.ReferenceOTU116	3	9	0	0	0	21	0	20	55	0	16	0	31	0	1	7	4	0	0	0	3	6	3	0	1	1	0	7	0	2	0	5	0	7	0	0	0	7	0	0	0	0	1	5	0	0	1	0	0
OTU4466640	0	2	0	0	0	0	0	12	0	0	0	0	0	1	17	0	0	0	0	1	70	0	0	0	0	0	0	1	0	3	0	0	0	69	6	5	0	14	0	0	0	10	0	0	0	0	0	6	0
OTUNew.CleanUp.ReferenceOTU167	0	8	0	4	3	0	0	23	15	0	0	0	0	0	4	0	0	6	0	6	0	0	1	0	1	7	0	0	0	5	0	20	0	0	0	2	0	4	0	0	0	0	0	0	0	0	0	0	0
OTU3189290	0	0	0	0	1	7	30	0	0	0	0	0	0	0	0	0	6	0	0	0	0	5	0	0	0	0	0	0	8	0	1	0	0	1	3	0	19	0	4	0	0	0	10	0	0	0	0	0	2
OTUNew.ReferenceOTU405	80	96	0	41	0	0	0	4	0	10	0	0	0	0	26	0	0	0	0	0	0	0	0	0	0	0	0	0	0	0	0	0	0	0	0	0	0	0	0	0	0	0	0	0	0	0	0	0	0
OTUNew.CleanUp.ReferenceOTU166	0	0	0	0	0	0	0	0	0	0	0	0	0	0	0	0	0	0	0	0	0	0	0	0	0	0	0	0	0	0	0	0	0	0	0	0	0	0	0	0	0	0	0	0	0	0	0	0	0
OTUNew.CleanUp.ReferenceOTU134	0	0	9	0	4	3	27	0	0	0	8	0	0	45	3	0	38	1	0	0	3	110	0	0	0	0	0	0	0	0	0	0	0	0	0	0	2	0	0	0	0	0	0	0	0	0	0	0	1
OTUNew.CleanUp.ReferenceOTU222	5	2	0	61	0	2	0	1	0	3	0	1	0	0	1	0	0	3	0	4	0	0	0	0	0	0	0	0	0	0	0	0	0	1	2	0	3	0	0	0	0	0	0	2	0	0	0	3	0
OTUNew.CleanUp.ReferenceOTU125	0	0	3	0	0	0	5	1	1	0	0	0	1	19	0	0	29	0	1	0	0	68	1	22	0	0	8	4	31	0	0	0	3	0	34	0	2	0	0	0	0	0	9	0	1	0	0	0	8
OTU827057	0	16	0	3	0	0	1	0	0	14	0	15	0	0	0	9	0	11	0	17	0	0	0	0	0	2	0	0	0	0	0	74	0	0	0	0	0	0	0	93	0	0	0	0	0	0	0	0	0
OTUNew.CleanUp.ReferenceOTU212	0	38	0	46	0	0	0	1	0	34	0	69	0	0	0	1	0	16	0	39	0	0	0	0	0	9	0	0	0	0	0	0	0	0	0	0	0	0	0	2	0	0	0	0	0	0	0	0	0
OTUNew.CleanUp.ReferenceOTU634	0	0	0	0	0	21	0	8	63	1	16	0	21	2	6	0	0	0	0	0	1	0	3	0	11	0	0	0	0	0	0	0	0	0	0	0	0	0	0	0	0	0	0	0	0	1	0	6	0
OTU136025	0	154	8	13	1	0	0	0	0	0	0	0	0	8	1	2	0	3	0	0	0	0	3	0	0	3	0	0	0	0	0	2	0	0	0	2	0	0	1	2	0	0	1	0	0	0	0	0	0
OTU251787	0	32	0	66	0	1	0	0	0	15	0	65	0	0	0	13	0	3	0	47	0	0	0	0	0	7	0	0	0	0	0	0	1	0	0	0	0	0	0	5	0	0	0	0	0	0	0	0	0
OTUNew.ReferenceOTU513	1	0	9	0	13	2	6	1	9	1	2	0	15	0	1	0	4	0	0	0	1	14	0	1	0	0	17	0	3	0	0	0	19	3	11	5	39	0	7	0	5	0	7	0	0	0	1	0	5
OTUNew.CleanUp.ReferenceOTU194	0	6	0	0	0	8	0	0	1	0	0	15	0	0	0	0	0	4	0	0	0	0	0	0	0	8	0	2	0	1	0	2	0	0	0	0	0	1	0	2	0	53	0	87	0	11	1	1	0
OTUNew.ReferenceOTU260	0	0	0	0	0	0	0	0	0	0	0	0	0	0	0	0	0	0	0	0	0	0	0	0	0	0	2	0	0	0	0	0	0	0	0	0	0	0	0	0	0	0	0	0	0	0	4	0	0
OTUNew.CleanUp.ReferenceOTU2921	3	1	2	0	29	0	0	2	3	0	0	0	3	0	0	1	2	0	3	0	0	2	0	1	0	0	3	0	4	0	2	0	6	0	1	7	11	2	8	1	3	0	10	7	0	1	1	1	6
OTU213742	0	0	12	0	22	1	2	0	1	1	0	0	9	0	0	0	0	0	3	0	0	3	0	0	0	0	11	0	7	0	2	1	19	0	3	0	51	3	49	0	39	0	4	0	0	0	0	0	0
OTUNew.CleanUp.ReferenceOTU150	0	4	0	55	0	0	0	0	1	20	0	138	1	0	0	0	0	3	0	20	0	0	0	0	0	3	0	0	0	0	0	0	0	0	0	1	0	0	0	0	1	0	0	0	1	0	0	0	0
OTU4465296	21	3	0	1	6	8	0	27	10	0	6	2	7	2	14	13	3	4	0	2	10	0	14	7	25	4	0	5	0	0	0	4	0	5	0	2	0	3	0	7	0	0	0	2	0	3	0	2	0
OTU580195	0	0	0	0	0	0	0	0	0	0	0	0	0	2	2	0	8	0	0	0	2	22	0	0	0	0	0	0	0	0	0	0	0	17	58	2	2	1	0	0	0	1	0	2	0	0	0	11	1
OTUNew.CleanUp.ReferenceOTU217	0	0	0	0	0	0	2	0	1	0	1	1	1	0	0	0	4	0	0	1	0	0	0	0	0	0	0	0	0	0	0	0	0	0	0	0	0	0	0	0	0	1	0	0	0	1	5	6	0
OTU546191	2	4	0	6	0	16	1	0	0	5	0	3	0	3	1	7	0	10	0	1	14	0	17	0	15	10	0	4	0	2	0	1	0	1	0	94	3	1	0	9	0	0	0	0	0	4	0	0	0
OTUNew.CleanUp.ReferenceOTU146	0	0	0	0	0	0	0	0	0	2	0	13	0	0	0	0	0	8	0	19	1	0	0	0	0	63	0	0	0	3	0	39	0	0	0	1	0	7	0	11	0	2	0	1	0	1	0	0	0
OTUNew.CleanUp.ReferenceOTU241	0	0	0	0	0	15	0	0	7	0	0	0	0	0	0	0	0	0	0	11	1	0	0	0	2	0	0	0	0	0	0	0	0	0	0	0	1	7	0	0	0	1	9	9	0	1	0	6	2
OTUNew.CleanUp.ReferenceOTU137	0	41	0	19	0	1	0	71	0	5	0	52	0	0	0	2	0	9	0	29	0	0	0	1	0	11	0	0	0	0	0	5	0	2	0	0	0	0	0	1	0	0	0	0	0	0	0	0	0
OTUNew.CleanUp.ReferenceOTU135	0	3	0	2	0	0	0	0	0	0	0	0	0	0	0	12	0	19	2	10	4	0	44	0	15	10	0	8	0	39	0	0	0	2	0	0	0	16	0	0	0	1	0	1	0	20	0	0	0
OTUNew.CleanUp.ReferenceOTU160	44	49	0	3	0	2	0	66	0	11	0	0	0	0	28	10	0	2	0	7	2	0	3	4	1	1	0	0	0	1	0	0	0	3	2	4	0	0	0	0	0	0	0	0	0	1	0	1	0
OTUNew.CleanUp.ReferenceOTU138	11	27	0	3	0	6	0	37	15	0	10	0	16	1	0	9	1	5	0	2	2	1	5	0	59	1	0	0	0	0	0	18	0	6	0	1	0	2	0	0	0	0	0	0	0	0	0	0	0
OTUNew.CleanUp.ReferenceOTU960	4	0	0	0	0	0	0	2	0	0	0	0	0	1	1	0	0	1	0	0	2	9	1	1	0	2	3	0	1	2	0	0	1	0	3	5	9	1	1	7	0	5	0	46	0	1	0	0	3
OTU145556	0	5	0	13	0	0	0	1	0	2	0	14	0	0	1	5	0	19	0	31	1	0	1	0	3	9	0	0	0	3	0	17	0	0	0	0	0	2	0	12	0	0	0	0	0	3	8	0	0
OTU588196	0	0	5	0	13	8	28	0	10	0	5	0	3	80	2	1	73	0	0	0	0	16	0	0	0	0	0	0	0	0	0	0	0	1	0	0	0	0	0	0	0	0	0	0	0	0	0	0	0
OTUNew.CleanUp.ReferenceOTU159	0	0	0	0	0	0	0	0	0	0	0	0	0	0	0	0	0	0	0	0	0	0	0	0	0	0	0	0	0	0	0	0	0	0	0	0	0	0	0	3	0	0	0	0	0	51	0	0	0
OTUNew.CleanUp.ReferenceOTU142	0	1	0	0	1	50	14	1	41	0	30	0	44	10	12	1	15	0	0	0	2	3	3	2	0	0	0	0	0	0	0	0	0	0	7	0	0	0	0	0	0	0	0	0	0	0	0	4	0
OTUNew.CleanUp.ReferenceOTU1152	0	13	0	4	1	0	0	2	7	12	6	3	11	18	3	16	7	4	0	2	0	4	1	0	7	1	0	3	0	6	0	1	0	0	0	0	0	1	0	2	0	0	2	0	0	0	0	3	1
OTUNew.CleanUp.ReferenceOTU176	0	0	0	0	1	0	0	0	2	0	0	0	0	0	0	0	0	5	0	0	1	0	2	0	0	12	1	3	0	5	0	0	0	0	0	0	0	1	0	0	0	0	0	0	1	0	0	0	0
OTUNew.CleanUp.ReferenceOTU264	0	19	0	19	0	0	0	0	0	21	0	162	0	0	0	0	0	6	0	16	0	0	0	0	0	1	0	0	0	0	0	0	0	0	0	0	0	0	0	0	0	0	0	0	0	0	0	0	0
OTU325418	1	38	0	39	0	0	0	8	1	3	1	2	5	1	10	6	0	3	0	2	21	16	2	0	6	2	0	1	0	6	0	0	0	18	3	30	4	0	0	0	0	1	1	5	0	0	0	3	0
OTU2209139	6	31	0	20	2	3	0	3	8	0	15	10	34	0	0	2	0	2	0	0	1	0	0	0	1	1	0	0	0	0	0	2	2	1	0	1	0	0	0	0	0	1	0	0	0	0	15	0	0
OTUNew.ReferenceOTU309	0	8	0	0	0	0	0	17	0	0	0	18	0	0	0	19	0	8	0	0	0	0	54	0	9	19	0	6	0	5	0	15	0	0	0	23	0	7	0	1	0	0	0	0	0	2	0	0	0
OTUNew.ReferenceOTU328	12	10	0	8	0	1	0	13	0	1	0	6	0	0	15	12	0	10	0	4	10	3	25	0	8	8	0	5	0	5	0	3	0	3	2	17	1	4	0	6	0	2	0	2	0	3	0	2	0
OTUNew.ReferenceOTU200	0	0	0	0	0	0	0	0	0	0	0	0	0	0	0	0	0	0	0	0	0	0	0	0	0	0	0	0	0	1	4	0	9	0	0	0	0	2	0	0	0	0	1	2	0	0	32	0	0
OTUNew.ReferenceOTU564	0	2	0	0	0	0	0	0	0	0	0	0	0	0	0	0	0	0	0	0	0	0	0	0	0	0	0	2	5	0	0	0	0	0	0	0	2	0	1	0	0	0	3	0	0	0	0	0	0
OTUNew.CleanUp.ReferenceOTU152	0	52	0	24	0	0	0	0	0	54	0	47	0	0	0	1	0	23	0	26	0	0	0	0	0	8	0	0	0	0	0	0	0	0	0	0	0	0	0	7	0	0	0	0	0	0	0	0	0
OTUNew.CleanUp.ReferenceOTU145	1	51	0	16	0	0	0	38	0	20	0	63	0	0	0	5	0	13	0	34	0	0	0	0	0	1	0	0	0	0	0	0	0	0	0	0	0	0	0	0	0	0	0	0	0	0	0	0	0
OTU4395734	0	1	0	13	1	0	0	1	5	11	2	12	3	0	0	2	0	2	0	29	0	0	0	2	8	17	3	0	0	19	0	57	0	0	0	0	0	5	0	3	0	0	0	1	0	1	4	0	0
OTUNew.CleanUp.ReferenceOTU737	12	17	0	3	1	3	0	10	1	0	0	4	0	0	6	10	0	11	0	7	4	0	14	0	4	7	0	2	0	6	0	3	0	1	0	30	0	9	0	15	0	3	0	11	0	8	0	1	0
OTUNew.CleanUp.ReferenceOTU229	0	0	0	0	0	0	0	2	0	0	0	0	0	17	4	2	0	8	0	4	18	3	6	0	16	1	0	5	0	3	0	0	0	12	0	11	2	23	0	14	0	0	0	4	0	0	2	6	0
OTUNew.CleanUp.ReferenceOTU126	0	0	19	0	18	2	11	0	0	0	0	0	0	4	0	1	10	0	0	0	0	4	0	1	0	0	57	0	6	0	14	2	15	0	0	0	4	0	1	0	18	2	0	0	0	0	0	0	0
OTU4411706	0	0	0	0	0	0	0	0	1	0	0	0	0	0	0	0	0	0	0	0	0	3	0	0	0	0	0	0	0	0	0	0	0	0	0	0	0	0	0	0	0	0	1	1	0	0	26	0	0
OTU117907	5	0	0	3	0	1	0	10	0	0	0	4	0	2	4	5	0	6	1	0	4	8	10	4	2	3	4	1	1	5	2	1	0	4	8	7	3	2	1	7	0	1	0	5	0	2	1	12	2
OTUNew.CleanUp.ReferenceOTU434	0	0	0	0	1	1	0	0	134	0	7	0	59	0	0	0	0	0	0	0	0	0	0	0	0	0	2	0	0	0	0	0	1	0	0	0	4	0	2	0	0	0	1	0	0	0	0	0	1
OTU1139344	0	6	7	3	6	13	29	0	3	0	0	0	0	0	0	0	0	0	0	0	0	7	0	0	0	0	2	0	0	0	0	0	1	0	0	0	9	0	6	0	6	0	0	0	0	0	0	0	0
OTU332009	0	0	0	0	0	3	2	0	2	0	0	0	0	0	0	0	0	0	0	0	0	3	10	0	0	0	0	0	0	1	0	0	0	0	0	0	3	0	0	0	0	0	2	5	0	0	5	2	3
OTU509124	1	4	3	0	10	11	1	2	0	1	0	0	0	1	0	0	4	0	0	0	0	5	0	0	0	0	0	9	0	0	1	0	10	0	0	0	7	0	12	0	0	0	22	3	0	0	0	0	7
OTUNew.ReferenceOTU349	0	0	4	0	13	7	11	0	1	0	0	0	0	5	0	0	19	0	8	0	2	19	0	34	0	0	29	0	16	0	9	1	13	0	19	0	8	0	7	0	1	0	2	0	0	0	0	0	6
OTUNew.CleanUp.ReferenceOTU403	0	0	0	0	2	0	1	0	61	0	25	0	67	0	0	0	0	0	0	0	0	0	0	2	0	0	6	6	0	0	0	0	0	0	0	0	0	0	0	0	1	0	3	0	0	0	5	0	0
OTUNew.CleanUp.ReferenceOTU282	0	0	0	0	0	0	0	0	0	1	0	0	0	16	3	0	2	0	0	0	0	7	0	0	0	0	0	10	0	0	0	2	0	0	3	0	1	0	0	1	0	3	4	5	3	0	6	13	1
OTU555343	40	6	0	3	7	23	4	11	16	1	30	0	1	4	44	9	13	0	0	0	7	2	0	2	0	0	0	0	0	0	0	0	0	0	0	3	1	0	1	0	1	0	2	0	1	0	0	0	1
OTUNew.CleanUp.ReferenceOTU214	0	7	0	0	0	0	0	13	0	0	0	9	0	0	0	14	0	11	0	7	0	0	15	0	20	0	0	2	0	3	0	21	0	0	0	0	0	0	0	29	1	0	0	1	0	3	0	1	0
OTUNew.CleanUp.ReferenceOTU274	0	0	0	0	0	2	12	0	0	0	0	0	0	3	1	0	1	0	0	0	0	0	0	1	0	0	0	3	0	1	0	0	0	9	8	0	6	8	6	0	1	1	75	10	0	0	0	38	15
OTUNew.CleanUp.ReferenceOTU529	1	0	0	0	0	6	3	7	0	0	7	0	0	2	0	0	2	4	6	0	0	4	0	0	2	2	0	0	0	0	0	1	0	0	0	0	0	0	0	0	0	2	3	1	0	0	9	1	0
OTUNew.CleanUp.ReferenceOTU179	0	0	0	1	0	8	0	9	3	0	2	0	0	1	0	1	0	0	1	0	1	0	4	8	4	0	0	0	1	1	0	0	0	0	6	0	0	4	0	1	0	0	0	0	0	0	0	6	0
OTU830221	0	46	0	33	0	0	0	0	0	16	0	34	0	0	0	6	0	3	0	34	0	0	0	0	0	22	0	0	0	0	0	0	0	0	0	0	0	0	0	42	0	0	0	0	0	0	0	0	0
OTU243743	0	0	0	0	0	0	0	0	147	0	0	0	0	0	0	0	0	2	0	0	0	0	0	0	0	0	0	0	0	0	0	0	0	0	0	0	0	0	0	0	0	0	0	0	0	1	0	0	0
OTU247304	0	0	0	0	0	0	0	0	0	3	0	0	0	0	23	3	0	6	0	2	85	0	0	0	0	2	0	0	0	1	0	4	0	22	10	58	1	3	0	0	0	0	0	0	0	1	0	0	0
OTUNew.ReferenceOTU384	7	5	0	2	6	0	0	15	1	2	6	0	8	0	0	0	0	1	0	1	25	3	4	0	0	0	1	8	7	0	0	2	2	2	4	41	20	6	5	13	0	0	4	5	0	0	0	2	5
OTUNew.ReferenceOTU524	6	1	2	0	11	5	0	0	20	0	12	0	23	2	0	0	2	0	1	0	3	6	0	3	0	0	16	1	0	0	0	0	2	0	1	2	25	0	5	0	7	0	7	2	0	0	2	0	0
OTUNew.CleanUp.ReferenceOTU2010	0	0	0	0	0	0	0	0	0	0	0	0	0	0	0	0	0	0	0	0	0	0	0	0	0	0	0	0	0	0	0	0	0	0	0	0	0	0	0	0	0	0	1	9	0	0	3	0	0
OTUNew.CleanUp.ReferenceOTU673	3	7	0	1	0	1	0	5	13	3	0	5	1	0	5	1	0	0	0	0	0	0	5	0	46	3	0	2	0	34	0	21	0	2	0	1	0	4	0	0	0	0	0	4	0	0	0	2	0
OTUNew.CleanUp.ReferenceOTU379	0	0	0	0	0	0	0	0	3	0	0	0	0	6	2	0	0	0	0	0	0	0	12	0	0	7	0	0	0	1	0	0	0	0	0	0	0	1	0	4	0	1	0	0	0	7	1	0	0
OTUNew.CleanUp.ReferenceOTU1021	0	0	0	0	0	0	0	0	2	0	0	0	5	0	0	0	0	0	0	0	0	0	0	0	0	4	3	0	4	0	0	0	0	0	0	0	3	2	0	0	0	1	2	0	0	0	21	0	1
OTU312030	0	2	0	0	0	0	0	0	1	2	0	0	0	0	0	6	0	5	0	6	0	0	0	0	0	13	0	0	0	6	0	9	1	0	0	0	0	0	0	35	0	1	0	0	0	10	5	0	0
OTU831558	0	0	0	0	0	1	0	0	0	0	0	0	0	0	0	0	0	0	0	0	5	1	0	8	0	0	0	8	0	0	0	0	0	0	0	3	6	12	5	3	0	5	28	24	1	0	1	9	4
OTUNew.ReferenceOTU609	0	0	0	0	0	1	0	0	1	0	2	0	2	0	0	0	0	0	0	0	0	0	0	0	0	0	0	0	0	0	0	0	0	0	0	0	1	0	0	0	1	1	2	5	0	0	2	0	1
OTUNew.CleanUp.ReferenceOTU971	2	2	13	0	11	3	3	2	4	0	11	2	4	2	3	0	0	2	2	0	0	11	0	7	0	0	8	0	1	0	2	0	17	1	5	3	22	0	10	1	2	0	6	0	0	0	2	0	5
OTUNew.CleanUp.ReferenceOTU195	0	0	0	0	0	0	0	0	0	0	0	0	0	0	0	0	0	0	0	0	0	0	0	0	0	0	0	0	0	0	0	0	0	0	0	0	0	0	0	0	0	0	0	0	0	0	0	0	0
OTUNew.CleanUp.ReferenceOTU187	0	1	0	9	0	0	0	17	66	0	5	6	1	0	0	0	0	1	0	2	0	0	2	0	3	17	0	6	0	17	0	19	0	0	0	0	0	2	0	2	0	0	0	0	0	0	0	0	0
OTU837714	0	5	0	51	0	0	0	0	0	22	0	126	0	0	0	0	1	2	0	25	0	0	0	0	0	1	0	0	0	0	0	0	0	0	0	0	0	0	0	0	0	0	0	0	0	0	0	0	0
OTU1126190	0	0	0	0	0	0	0	0	0	0	0	0	0	0	0	0	0	0	0	0	0	0	0	0	0	0	0	0	0	0	0	0	0	0	0	0	0	0	0	0	0	0	0	0	0	0	0	0	0
OTUNew.ReferenceOTU530	0	0	0	0	0	0	0	0	1	0	0	0	3	25	0	2	27	2	0	0	1	32	1	21	3	0	0	1	21	2	0	3	0	8	71	0	1	4	0	1	0	0	0	1	0	0	0	2	0
OTUNew.CleanUp.ReferenceOTU500	2	8	0	0	0	0	0	6	0	1	0	0	0	0	13	10	0	0	0	1	81	2	14	0	8	0	0	2	0	2	0	0	0	29	1	28	1	1	0	2	0	0	0	0	0	0	0	5	0
OTUNew.CleanUp.ReferenceOTU258	2	5	0	1	0	0	0	36	0	1	0	2	0	0	0	0	0	2	0	7	1	0	7	0	9	7	0	4	0	2	0	14	0	0	5	0	0	9	0	5	0	1	0	0	0	1	0	4	0
OTUNew.CleanUp.ReferenceOTU923	9	4	2	0	16	1	0	27	5	2	0	0	3	1	0	0	2	2	0	0	0	22	0	0	0	4	2	2	2	0	0	0	4	0	14	4	10	8	16	2	1	1	2	9	0	1	0	0	6
OTUNew.CleanUp.ReferenceOTU186	2	0	1	0	0	37	18	3	16	0	37	0	42	15	3	0	32	0	0	0	1	15	0	0	0	0	0	0	1	0	0	0	0	0	2	1	3	0	0	0	0	0	1	0	0	0	0	0	0
OTU837519	3	5	1	3	1	10	1	10	16	5	15	0	13	4	5	10	3	8	4	1	2	3	11	3	5	0	2	13	8	0	1	6	0	0	1	3	6	5	0	5	1	1	0	3	0	0	1	7	3
OTU3447869	0	0	0	0	0	0	0	0	0	0	0	0	0	0	0	0	0	0	0	0	0	0	0	0	0	0	0	0	0	0	0	0	0	0	0	0	4	0	4	0	0	0	0	0	0	0	0	0	0
OTUNew.CleanUp.ReferenceOTU245	0	0	71	0	107	0	0	0	0	0	0	0	0	1	0	0	0	0	0	0	0	0	0	0	0	0	0	0	0	0	0	0	0	0	0	0	0	0	0	0	0	0	0	0	0	0	0	0	0
OTUNew.CleanUp.ReferenceOTU228	0	14	0	10	0	1	0	8	0	0	0	1	0	0	1	0	0	18	0	6	0	0	1	0	0	10	0	1	1	2	0	13	0	0	0	0	0	2	0	35	0	1	0	0	0	17	0	0	0
OTU513523	0	0	2	0	1	24	67	0	0	0	0	0	0	0	0	0	0	0	0	0	0	12	0	0	0	0	0	0	1	0	24	0	6	0	5	0	1	0	11	0	0	0	2	0	0	0	0	0	0
OTU829205	0	3	0	2	0	4	0	12	0	0	0	0	0	0	0	0	2	12	0	1	0	0	0	0	0	5	0	0	0	0	0	13	0	1	0	0	0	3	0	10	0	1	0	19	0	8	0	1	0
OTUNew.ReferenceOTU546	0	0	6	0	17	3	2	0	0	0	1	0	1	0	2	0	4	1	3	0	0	13	0	14	0	0	20	2	10	0	13	0	24	0	12	0	20	1	11	0	18	0	9	0	0	0	0	0	3
OTU1992597	11	2	4	0	4	42	10	7	25	14	4	0	0	71	7	3	9	0	0	0	0	1	1	0	0	0	0	0	0	0	0	0	0	0	0	0	0	0	0	0	0	0	0	0	0	0	0	0	0
OTU833088	0	13	0	71	0	0	0	0	0	9	0	56	0	0	0	4	0	15	0	36	0	0	0	0	0	20	0	0	0	0	0	0	0	1	0	0	0	0	0	4	0	0	0	0	0	0	0	0	0
OTU568420	0	0	0	0	0	0	0	0	0	0	0	0	0	0	0	0	0	0	0	0	0	0	0	0	0	0	0	0	0	0	0	0	0	0	0	0	0	0	0	0	0	0	0	0	0	0	0	0	0
OTU4421429	0	0	5	0	18	0	0	1	1	1	3	0	14	0	0	0	2	1	0	0	3	5	0	0	1	0	20	4	0	4	1	0	5	0	1	11	29	2	12	2	12	2	7	6	0	0	8	0	5
OTU558480	2	2	31	1	23	2	7	3	6	0	2	0	3	7	1	2	10	0	13	0	1	5	0	4	0	2	13	2	3	0	7	1	4	3	2	0	16	0	6	0	2	0	5	0	0	0	0	0	0
OTUNew.CleanUp.ReferenceOTU200	2	19	0	0	0	0	0	5	0	48	0	0	0	0	0	59	2	0	0	0	2	0	22	0	4	5	0	0	0	8	0	0	0	2	0	15	0	4	0	0	0	0	0	4	0	0	0	0	0
OTUNew.CleanUp.ReferenceOTU112	0	0	96	0	62	0	1	0	1	0	0	0	0	18	1	0	11	0	4	0	0	2	0	0	0	0	0	0	0	0	0	0	0	0	0	0	0	0	0	0	0	0	0	0	0	0	0	0	0
OTU753656	0	0	5	0	1	3	8	0	1	0	0	0	0	2	0	0	1	0	0	0	0	1	0	0	0	0	0	0	0	0	0	0	0	0	0	0	2	0	2	0	0	0	0	0	0	0	0	0	0
OTUNew.ReferenceOTU278	150	24	0	1	0	16	0	1	0	2	0	0	0	0	25	0	4	0	0	0	0	0	0	0	0	0	0	0	0	0	0	0	0	2	0	0	0	0	0	0	0	0	0	0	0	0	0	0	0
OTUNew.CleanUp.ReferenceOTU220	2	27	0	1	0	0	0	22	0	15	0	19	0	0	5	19	0	18	0	15	0	0	7	0	12	20	0	0	0	5	0	2	0	0	0	1	0	0	0	18	0	0	0	2	0	1	0	0	0
OTUNew.CleanUp.ReferenceOTU411	26	10	0	1	0	0	0	17	0	1	0	1	0	0	0	0	0	3	0	2	7	0	4	0	1	2	0	0	0	1	0	0	0	1	0	64	0	3	0	14	0	6	0	7	0	9	0	0	0
OTUNew.CleanUp.ReferenceOTU118	1	0	17	1	11	0	6	0	2	0	3	0	2	56	0	0	52	0	1	0	0	32	0	5	0	0	10	0	2	0	0	0	0	4	17	0	1	0	0	0	0	0	0	0	0	0	0	0	0
OTU4469172	2	0	0	0	0	1	14	0	1	0	0	0	0	9	8	0	2	0	0	1	0	2	1	0	0	0	0	0	5	0	1	0	3	0	7	0	6	0	1	0	3	0	67	0	3	0	0	1	30
OTU585439	3	8	0	3	0	0	0	10	0	2	0	0	0	0	0	4	6	17	0	1	0	0	13	0	10	17	0	5	0	4	0	21	0	0	0	3	0	4	0	34	0	0	0	0	0	13	0	3	0
OTU91087	1	0	0	0	0	33	0	13	66	0	22	0	54	3	2	1	4	0	2	0	6	3	2	1	0	3	2	2	1	1	0	0	0	0	0	0	0	0	1	0	0	0	0	0	0	0	0	0	0
OTUNew.ReferenceOTU407	0	0	0	0	0	0	0	1	9	0	3	0	0	22	0	9	10	0	0	0	0	11	1	0	4	2	0	4	0	3	0	8	0	0	0	0	0	1	0	5	0	0	1	3	0	0	22	4	0
OTUNew.CleanUp.ReferenceOTU213	0	0	0	3	0	0	0	2	0	0	1	0	3	0	0	21	13	8	0	4	13	7	13	0	13	4	0	2	0	6	0	6	0	9	0	5	0	7	0	1	0	1	0	0	0	0	0	1	0
OTUNew.CleanUp.ReferenceOTU233	0	0	0	0	0	0	0	0	0	0	0	0	0	0	0	0	0	0	0	0	0	1	5	0	0	0	0	7	0	0	0	0	0	0	0	0	0	1	0	0	0	1	0	6	0	0	1	5	0
OTU695627	0	17	0	17	0	0	0	6	0	8	0	1	0	0	0	7	0	31	0	18	0	0	15	0	0	35	0	0	0	2	0	36	0	0	0	0	0	12	0	7	0	1	0	3	0	1	0	0	0
OTUNew.CleanUp.ReferenceOTU363	0	6	0	3	0	0	0	0	0	3	0	0	0	0	2	3	0	7	0	4	65	0	6	0	42	3	0	7	0	18	0	0	0	13	3	10	0	7	0	0	0	2	0	0	0	0	0	7	0
OTUNew.CleanUp.ReferenceOTU154	0	0	0	0	0	0	0	0	0	0	0	0	0	0	46	1	0	0	0	0	79	7	4	0	6	0	0	0	0	0	0	0	0	45	3	9	0	8	0	0	0	0	0	0	0	0	0	4	0
OTUNew.CleanUp.ReferenceOTU131	0	39	0	81	0	0	0	0	0	19	0	54	0	0	0	1	0	7	0	18	0	0	0	0	0	5	0	0	0	0	0	0	0	0	0	0	0	0	0	0	0	0	0	0	0	0	0	0	0
OTUNew.CleanUp.ReferenceOTU289	0	1	0	0	0	4	0	0	0	1	0	0	0	4	1	3	8	3	0	0	22	4	7	0	20	0	0	11	0	1	0	0	0	1	10	7	19	2	0	0	0	0	1	0	0	0	0	54	3
OTUNew.CleanUp.ReferenceOTU1290	0	2	10	0	19	2	1	1	3	1	3	0	8	0	0	0	0	0	3	0	0	12	2	4	2	0	13	0	7	0	0	0	14	0	3	7	16	2	15	0	11	0	2	4	0	0	1	0	2
OTU185297	2	10	0	20	0	0	0	1	0	0	3	4	0	0	0	41	0	12	2	14	4	0	15	0	30	37	0	3	0	0	3	0	0	7	1	3	0	1	0	0	0	0	0	0	0	1	0	0	0
OTUNew.CleanUp.ReferenceOTU147	0	6	0	1	0	0	0	2	0	2	0	0	0	0	0	30	0	2	0	17	5	0	58	0	72	4	0	0	0	0	0	2	0	0	0	0	0	7	0	6	0	0	0	0	0	1	0	0	0
OTUNew.CleanUp.ReferenceOTU173	3	1	0	0	0	0	0	41	0	0	0	0	0	0	0	0	0	4	0	0	0	0	5	0	7	0	0	0	0	3	0	0	0	0	0	0	0	1	0	0	0	0	0	7	0	1	4	8	1
OTU126508	0	0	0	0	0	2	0	0	3	0	3	0	0	1	0	0	1	0	3	0	0	0	0	0	0	0	0	0	0	0	0	0	0	0	0	0	4	0	0	0	2	0	1	1	0	0	0	0	0
OTUNew.ReferenceOTU251	4	2	0	0	0	19	0	13	72	2	21	0	7	1	0	5	2	0	0	1	2	0	9	5	1	0	0	2	0	3	0	3	0	0	0	2	0	3	0	0	0	0	2	7	0	0	0	0	0
OTUNew.CleanUp.ReferenceOTU223	1	0	3	2	0	2	30	8	5	0	0	0	0	0	0	0	2	0	4	0	0	32	0	8	0	0	1	2	13	0	3	0	5	6	41	3	10	0	1	0	1	0	4	0	1	0	0	2	8
OTUNew.CleanUp.ReferenceOTU654	2	0	0	0	1	0	0	0	1	0	4	2	16	0	2	0	1	0	0	0	0	2	0	1	0	0	7	0	0	0	0	0	1	0	0	0	5	0	2	0	3	0	3	1	0	1	9	0	3
OTU4459003	0	4	0	1	0	0	0	0	0	0	0	0	0	0	0	0	0	0	0	0	0	0	0	0	0	0	0	0	0	0	0	0	0	0	0	0	0	0	0	0	0	0	0	0	0	0	0	0	0
OTU732542	5	1	0	0	1	1	0	12	0	0	0	0	0	0	0	0	0	1	0	1	1	4	0	0	0	1	1	0	0	0	0	0	0	2	2	0	1	7	3	11	0	1	1	12	0	4	3	0	4
OTU671732	3	0	0	0	0	6	0	2	0	0	0	0	0	0	1	9	0	1	0	0	51	34	5	1	13	0	0	3	2	0	0	0	0	34	6	42	2	1	0	0	0	0	0	1	1	0	0	3	0
OTUNew.ReferenceOTU327	65	1	0	3	0	3	1	51	0	0	0	0	0	5	34	28	1	0	0	1	1	10	0	0	0	0	0	1	0	0	0	0	0	5	5	1	1	0	0	0	0	0	0	0	0	0	0	3	0
OTUNew.ReferenceOTU351	3	23	1	0	0	0	0	15	0	15	0	1	0	1	66	9	0	4	0	3	8	4	3	0	0	3	0	0	0	0	0	0	0	9	0	50	1	1	0	0	0	0	0	0	0	0	0	0	0
OTUNew.CleanUp.ReferenceOTU710	0	8	0	4	0	5	0	17	1	0	0	15	0	0	0	1	0	8	0	7	2	0	6	0	8	5	0	0	0	11	0	10	0	3	4	6	0	8	0	5	0	4	0	3	0	11	0	0	0
OTU4323589	0	1	0	9	0	0	0	2	0	0	0	31	0	0	0	5	0	26	0	98	0	0	1	0	8	20	0	0	0	0	0	0	0	0	0	0	0	0	0	4	0	0	0	0	0	0	0	0	0
OTU326326	13	5	3	1	5	0	4	73	0	12	0	0	0	3	11	32	0	3	0	1	4	4	6	0	0	6	0	1	0	0	0	7	0	3	3	3	7	0	1	0	0	0	1	0	0	0	0	0	0
OTUNew.CleanUp.ReferenceOTU177	0	0	0	0	0	0	0	0	0	0	0	0	0	0	0	0	1	0	0	0	0	0	0	0	0	0	0	6	1	0	0	0	3	0	0	0	6	0	1	0	0	0	0	1	0	0	0	0	0
OTU230145	0	2	0	6	0	0	0	32	2	0	0	0	0	1	0	0	1	0	0	1	2	3	0	1	1	2	0	0	2	3	0	0	0	0	0	0	0	10	0	1	0	0	0	4	0	3	3	0	1
OTUNew.ReferenceOTU425	0	0	2	0	20	2	13	0	0	0	0	0	0	0	0	0	0	0	2	0	0	0	0	0	0	0	9	0	1	0	2	0	3	0	0	0	4	0	14	0	147	0	0	0	0	0	0	0	0
OTUNew.ReferenceOTU500	0	0	6	0	5	0	0	0	5	0	0	0	0	0	0	0	0	0	1	0	0	0	0	1	0	0	3	0	0	0	0	0	12	0	1	0	4	0	1	0	7	0	3	0	0	0	13	0	2
OTUNew.CleanUp.ReferenceOTU153	0	0	0	0	0	0	0	1	0	0	0	0	0	0	0	0	0	0	0	0	0	0	0	0	0	0	0	0	0	0	0	0	0	0	0	0	0	0	0	0	0	0	0	1	0	0	0	0	0
OTU764684	3	0	2	0	2	1	0	2	0	1	0	1	0	0	0	0	0	1	0	2	0	7	3	0	0	1	0	0	1	0	0	2	1	1	2	0	8	1	0	21	0	0	1	10	0	4	5	5	2
OTUNew.ReferenceOTU497	0	0	0	0	2	1	0	0	20	0	3	0	16	0	0	0	0	0	0	0	0	3	0	0	0	0	13	0	6	0	0	0	1	0	0	0	2	0	0	0	1	0	4	2	0	1	5	0	1
OTUNew.CleanUp.ReferenceOTU295	0	0	0	0	0	0	2	0	0	0	2	0	0	1	0	0	0	0	0	0	0	0	0	2	0	0	0	0	0	0	0	0	0	0	0	0	0	0	0	0	0	0	0	0	0	1	70	0	0
OTUNew.CleanUp.ReferenceOTU4874	0	0	0	0	0	3	2	1	25	0	33	0	55	4	0	1	9	1	0	0	0	0	0	0	0	0	0	0	0	0	0	0	0	1	0	0	0	0	0	0	0	0	0	1	2	0	3	1	0
OTU587874	0	1	0	3	0	0	0	3	0	0	0	1	0	0	2	10	0	7	0	4	0	0	0	0	7	6	0	0	0	3	0	0	0	0	2	1	0	3	0	15	0	0	0	6	0	10	0	0	0
OTU4409513	0	19	0	5	0	2	0	6	1	6	0	1	0	0	3	21	0	23	0	8	0	0	2	0	3	16	0	0	0	0	0	0	0	0	1	0	0	8	0	4	0	0	0	2	0	4	0	0	0
OTU684859	1	0	1	0	7	8	4	0	7	0	13	1	11	5	0	0	4	6	4	0	1	17	2	3	1	0	2	3	5	1	6	2	4	0	21	0	5	1	12	6	7	0	1	16	0	0	1	0	1
OTU1110730	4	2	0	0	0	0	0	14	0	0	0	0	0	0	1	5	0	0	0	1	7	0	0	0	10	2	0	2	0	0	0	7	0	1	0	0	0	14	0	8	0	3	0	6	0	2	1	0	0
OTUNew.CleanUp.ReferenceOTU161	0	0	7	0	22	5	37	1	0	0	0	0	0	5	0	0	1	0	1	0	1	4	0	0	0	0	9	1	2	0	5	0	4	0	0	0	0	0	23	0	87	0	0	0	0	0	0	0	0
OTU2345806	0	0	0	0	0	9	0	5	4	0	0	0	0	14	3	18	12	1	1	1	0	4	0	0	3	17	2	7	2	1	0	16	0	0	4	0	2	9	1	5	0	0	0	1	1	7	0	4	1
OTU325906	2	0	0	2	0	0	0	0	0	0	0	0	0	0	0	0	0	0	0	0	0	0	0	5	0	0	0	4	10	0	1	0	3	0	2	0	27	0	7	0	0	0	0	0	0	0	0	2	4
OTU231758	0	0	0	0	0	0	0	0	2	0	0	0	2	3	0	0	2	2	0	2	0	4	4	0	2	0	0	0	0	9	0	0	0	3	0	0	0	3	0	3	0	1	0	0	0	4	1	2	0
OTUNew.CleanUp.ReferenceOTU314	0	0	0	0	0	0	0	0	9	0	4	0	16	0	0	0	1	1	0	0	0	0	0	0	0	0	0	0	0	0	0	0	0	0	0	0	0	0	0	1	0	0	0	0	1	0	3	0	0
OTU990269	0	0	0	0	0	0	0	8	0	0	0	0	0	0	0	0	0	0	0	0	0	1	0	0	0	0	0	0	4	0	0	0	0	0	0	0	0	0	3	0	0	0	0	0	0	0	18	0	0
OTU3641986	0	0	0	0	0	0	0	0	0	0	0	0	0	0	0	22	0	150	34	5	0	0	0	0	2	0	0	0	0	0	0	0	0	0	0	0	0	0	0	2	0	0	0	0	0	0	0	0	0
OTU3774734	1	4	0	0	0	2	0	4	1	1	0	0	0	1	3	0	0	0	0	0	75	2	3	1	0	0	0	3	2	0	0	0	0	20	1	71	3	3	0	0	0	0	0	2	0	0	0	9	0
OTUNew.CleanUp.ReferenceOTU523	0	12	0	8	0	0	0	0	0	9	0	1	0	0	0	23	0	2	0	0	0	0	19	0	10	4	0	3	0	11	0	2	0	2	0	0	0	5	0	4	0	0	0	1	0	2	0	0	0
OTU4396740	0	0	0	0	0	0	0	2	0	0	0	0	0	0	0	0	0	5	0	12	0	0	0	0	0	5	0	0	0	3	0	0	0	0	0	0	0	6	0	55	0	0	0	0	0	14	0	0	0
OTU92835	0	0	0	0	6	0	0	0	0	0	0	0	0	0	0	0	0	1	9	0	0	0	0	21	0	0	48	0	0	0	1	0	0	0	0	0	0	0	0	0	0	0	1	0	0	0	12	0	0
OTUNew.ReferenceOTU531	15	0	0	0	0	0	0	9	0	0	0	0	0	0	0	7	0	9	0	0	13	2	14	0	13	10	0	5	0	20	0	17	0	0	7	0	0	10	0	1	0	0	0	0	0	6	0	0	0
OTUNew.CleanUp.ReferenceOTU1295	1	1	31	0	32	5	4	0	1	3	0	0	0	1	0	0	1	0	1	0	0	10	0	0	0	0	19	2	0	0	2	0	23	0	0	1	35	0	9	0	21	0	3	0	0	0	0	0	0
OTUNew.CleanUp.ReferenceOTU175	0	0	0	0	0	0	0	0	0	0	0	0	0	0	0	0	0	0	0	0	0	0	0	0	0	0	0	0	0	0	0	0	0	0	0	0	0	0	0	0	0	0	0	0	0	0	0	0	0
OTU335459	3	0	0	0	0	0	0	0	0	0	0	0	0	0	15	0	0	0	0	0	106	0	3	0	0	0	0	0	0	0	0	0	0	57	15	13	1	0	0	0	0	0	0	0	0	0	0	0	0
OTU822969	0	12	0	16	0	0	0	0	0	5	0	72	0	0	0	0	0	30	0	41	0	0	0	0	0	12	0	0	0	0	0	1	0	0	0	0	0	0	0	25	0	0	0	0	0	0	0	0	0
OTUNew.CleanUp.ReferenceOTU312	9	12	0	12	0	4	0	18	0	2	0	9	0	3	0	17	1	24	0	3	3	15	2	0	0	14	0	1	0	0	0	0	0	3	10	0	0	0	0	0	0	0	0	1	0	0	0	39	1
OTU810303	0	0	0	0	0	7	0	0	55	0	17	0	11	1	0	0	0	0	0	0	0	0	0	0	0	0	0	2	0	0	0	0	0	0	0	0	0	0	0	0	0	0	0	0	1	0	0	0	0
OTUNew.CleanUp.ReferenceOTU193	2	42	0	5	0	0	0	0	0	30	0	23	1	0	0	30	0	6	0	14	1	0	11	0	4	2	0	1	0	6	0	0	0	3	0	8	0	3	0	1	0	0	0	0	0	0	0	0	0
OTUNew.CleanUp.ReferenceOTU198	0	15	0	50	0	0	0	1	0	13	0	68	0	0	0	2	0	15	0	32	0	0	0	0	0	4	0	0	0	0	0	7	0	0	0	0	0	0	0	6	0	0	0	0	0	0	0	0	0
OTUNew.CleanUp.ReferenceOTU260	1	2	0	0	0	0	0	0	0	0	0	0	0	0	5	5	0	7	0	1	64	2	15	0	26	1	0	13	0	1	0	3	0	16	1	31	0	4	0	1	0	0	0	1	0	0	0	1	0
OTU1105317	2	3	0	3	0	0	0	2	0	0	0	0	0	0	6	6	0	12	0	21	1	0	6	0	0	7	0	0	0	8	0	24	0	2	1	0	0	2	0	16	0	0	2	0	0	18	0	0	0
OTU228608	0	6	1	0	0	21	0	6	0	0	0	0	0	1	0	0	0	7	0	0	0	0	1	3	0	1	0	0	0	3	0	0	0	0	0	0	0	0	0	1	0	13	0	6	0	6	2	0	0
OTUNew.CleanUp.ReferenceOTU283	2	0	0	0	3	8	1	2	12	0	0	0	4	0	1	0	0	2	0	0	0	1	0	0	0	0	3	0	2	0	0	0	2	0	0	0	4	0	0	0	3	1	1	0	0	0	13	0	0
OTU4375703	0	0	0	3	0	0	0	0	0	0	0	0	0	0	0	0	0	0	0	0	0	0	0	0	0	0	0	3	8	0	0	0	0	0	0	0	13	0	15	0	0	0	2	0	0	0	0	0	1
OTUNew.CleanUp.ReferenceOTU273	1	0	11	6	8	0	4	2	0	5	0	6	0	2	0	5	2	2	9	0	9	4	7	8	3	1	29	1	6	1	5	0	14	0	0	16	6	4	9	0	21	0	1	0	0	0	0	3	0
OTUNew.CleanUp.ReferenceOTU144	0	0	0	0	0	4	10	11	1	3	0	0	1	3	0	0	10	0	0	0	3	28	3	58	1	0	3	0	58	0	0	0	10	0	1	0	0	0	0	0	0	0	0	0	0	0	0	0	0
OTU2894059	0	0	0	0	2	3	9	0	0	0	0	0	0	0	0	0	0	0	0	0	0	0	0	2	0	0	0	3	27	0	0	0	0	2	3	0	11	0	24	0	1	0	4	0	1	0	0	0	0
OTUNew.CleanUp.ReferenceOTU190	0	5	0	0	0	0	0	0	0	0	0	0	0	0	0	0	0	0	0	1	0	0	0	0	0	3	0	0	0	0	0	7	0	0	0	0	0	0	0	27	0	0	0	0	0	9	0	0	0
OTU551042	0	0	2	1	9	1	8	0	0	0	0	0	0	0	0	0	2	0	5	0	0	2	0	3	0	0	14	0	1	0	14	5	5	0	0	1	10	0	22	0	89	0	0	0	0	0	0	0	0
OTU2027409	21	11	0	3	0	10	0	18	1	0	2	0	1	9	5	0	0	1	1	0	10	1	0	0	5	1	0	1	6	0	0	0	0	2	0	97	1	0	0	0	0	0	0	0	0	0	0	0	0
OTUNew.CleanUp.ReferenceOTU180	2	14	0	3	0	0	0	1	0	1	0	0	0	0	20	13	0	1	0	6	1	1	6	0	6	7	0	3	0	25	0	27	0	3	0	3	0	14	0	6	0	2	0	2	0	5	0	0	0
OTU583651	0	0	0	0	0	15	1	0	0	0	12	0	2	4	0	0	5	0	0	0	0	0	0	8	0	0	0	0	2	0	0	0	0	0	0	0	0	0	0	0	2	0	0	0	0	0	2	0	0
OTU4410004	0	0	0	0	0	0	0	0	0	0	0	0	0	0	0	0	0	0	0	0	0	0	0	0	0	0	0	0	0	0	0	0	0	0	0	0	1	0	0	0	0	0	0	0	0	0	0	0	0
OTU553766	0	0	25	0	22	1	16	1	0	0	0	11	5	2	0	4	2	0	1	0	0	1	0	1	0	1	31	0	2	0	4	0	8	0	0	0	1	0	2	0	67	0	0	0	0	0	0	0	0
OTU826084	0	2	0	39	0	0	0	6	0	7	0	7	0	0	0	1	0	54	0	8	0	0	5	0	2	16	0	1	0	2	0	7	0	0	0	0	0	3	0	11	0	0	0	0	0	6	0	0	0
OTUNew.CleanUp.ReferenceOTU191	1	2	0	11	0	1	1	4	39	5	13	0	29	0	0	18	0	7	0	0	2	0	6	0	9	3	0	1	0	2	0	33	0	0	0	0	0	5	0	0	0	0	0	3	0	0	0	0	0
OTU837317	0	5	0	50	0	0	0	0	0	25	0	99	0	0	0	0	0	7	0	16	0	0	0	1	0	3	0	0	0	0	0	0	0	0	0	0	0	0	1	0	0	0	0	0	0	0	0	0	0
OTU234196	0	0	0	0	0	2	1	0	0	0	0	0	0	0	0	0	0	0	0	0	0	0	0	0	0	0	0	0	0	0	0	0	0	0	0	0	1	0	0	0	2	0	1	4	0	0	2	0	0
OTUNew.ReferenceOTU416	4	1	0	0	0	31	3	14	18	14	12	2	6	7	1	1	1	0	2	0	0	0	4	0	6	0	0	9	2	2	0	0	0	0	0	1	0	0	0	0	0	0	0	4	3	0	3	0	0
OTUNew.ReferenceOTU196	0	0	0	0	0	0	0	0	1	0	0	0	0	0	0	0	0	0	0	1	0	0	6	0	1	3	0	1	2	0	0	5	0	0	0	0	5	1	0	4	0	0	1	0	0	0	38	2	1
OTUNew.CleanUp.ReferenceOTU169	0	0	0	0	0	0	0	0	0	0	0	0	0	0	0	0	0	0	0	0	0	0	0	4	0	0	3	0	0	0	0	0	0	0	0	0	0	0	0	0	0	1	6	0	0	0	3	3	3
OTUNew.CleanUp.ReferenceOTU221	0	0	0	0	0	0	0	0	0	0	0	0	9	0	0	0	0	0	0	0	0	0	0	0	0	0	0	13	0	0	0	0	0	0	0	0	0	0	0	0	0	5	2	10	0	0	0	1	0
OTUNew.CleanUp.ReferenceOTU204	4	27	0	10	0	6	9	14	0	0	0	0	0	4	2	13	0	2	0	2	0	1	4	0	7	0	0	1	0	2	0	0	0	4	0	0	3	7	0	0	0	1	2	5	0	0	0	2	2
OTUNew.CleanUp.ReferenceOTU377	2	0	0	0	3	0	0	24	0	4	0	0	0	0	1	1	1	4	7	2	0	21	5	1	4	0	3	3	4	2	0	5	0	0	0	0	3	2	0	0	0	1	3	2	0	0	1	0	0
OTUNew.ReferenceOTU150	0	0	0	0	0	0	0	0	0	0	0	0	0	0	0	0	0	0	0	0	0	0	1	0	0	0	0	0	0	0	0	0	0	0	0	0	0	0	0	0	0	0	0	0	0	0	0	0	0
OTUNew.CleanUp.ReferenceOTU962	1	0	0	0	3	0	0	0	29	0	35	0	46	1	0	1	1	0	0	0	0	0	0	0	0	0	3	0	1	0	1	0	2	0	1	2	1	0	0	0	1	0	12	1	0	0	2	1	7
OTUNew.ReferenceOTU162	0	0	0	0	0	0	0	4	0	0	0	0	0	0	0	0	0	0	0	0	0	0	0	0	2	0	0	2	0	17	0	0	0	0	0	0	0	0	0	1	0	4	0	11	0	1	0	0	0
OTUNew.CleanUp.ReferenceOTU278	0	0	0	0	0	0	0	0	0	0	0	0	0	0	0	0	0	0	0	0	0	0	0	0	0	0	1	6	0	0	0	0	0	0	0	0	0	1	0	0	0	6	17	1	0	0	8	3	2
OTUNew.CleanUp.ReferenceOTU227	1	0	0	0	0	2	0	2	0	0	8	0	0	8	1	8	9	0	2	1	3	3	2	3	0	0	2	4	0	0	1	0	0	0	0	0	7	1	0	0	0	0	8	0	3	0	0	2	2
OTU243160	3	0	2	0	3	1	0	0	3	2	3	0	7	5	0	0	3	0	1	0	1	6	0	2	2	0	3	0	1	0	3	0	1	1	2	0	5	1	0	0	1	0	2	0	0	0	21	5	3
OTU590041	0	1	0	1	1	0	0	0	0	0	0	0	0	6	0	0	0	0	0	0	1	0	0	31	0	0	1	6	0	0	1	0	0	0	0	0	0	0	0	2	0	7	1	12	0	0	0	0	0
OTUNew.ReferenceOTU574	12	11	7	2	2	43	5	18	40	3	16	3	14	5	5	1	1	2	0	0	2	0	0	0	0	2	0	2	0	0	0	0	0	4	0	0	0	0	0	0	0	0	0	0	0	0	0	0	0
OTUNew.CleanUp.ReferenceOTU168	0	1	0	0	0	0	0	0	0	0	0	0	0	0	0	42	0	7	0	3	8	0	29	0	24	4	0	2	0	6	0	25	0	0	2	0	0	3	0	6	0	0	0	0	0	2	0	0	0
OTU359953	7	0	0	0	0	6	0	18	42	4	3	2	23	0	6	1	0	1	0	0	1	2	3	6	2	6	1	6	0	5	0	6	0	0	3	19	1	3	0	0	0	0	0	0	1	0	0	5	0
OTUNew.ReferenceOTU604	0	0	0	0	0	0	1	0	0	0	0	0	0	2	0	0	38	0	1	0	0	29	0	1	0	0	0	4	0	0	0	0	0	0	4	1	9	0	8	0	0	1	54	0	1	0	0	0	27
OTUNew.CleanUp.ReferenceOTU299	0	2	0	4	0	0	0	0	0	2	0	0	0	0	0	44	0	15	0	6	0	0	11	0	2	1	0	2	0	19	0	15	0	0	0	0	0	2	0	2	0	0	0	0	0	3	0	0	0
OTUNew.CleanUp.ReferenceOTU189	0	23	0	12	0	0	0	0	0	19	0	65	0	0	0	3	0	1	0	30	0	0	4	0	8	2	0	2	0	2	0	3	0	0	0	0	0	0	0	10	0	0	0	0	0	3	0	0	0
OTU4382994	0	11	0	0	0	0	0	8	0	1	0	0	0	0	0	0	0	6	0	3	0	0	2	0	4	3	0	1	0	11	0	1	0	0	0	0	0	4	0	32	0	3	0	6	0	6	0	0	0
OTU112308	0	0	0	2	0	0	0	0	2	1	0	0	0	0	0	13	0	23	0	23	0	0	0	0	14	10	0	3	0	15	0	14	0	0	0	3	0	5	0	1	0	0	0	2	0	2	0	3	0
OTUNew.CleanUp.ReferenceOTU566	0	0	0	0	2	0	0	0	14	0	8	0	26	0	0	0	0	0	1	0	1	0	0	1	0	0	18	0	1	0	0	0	5	0	0	4	4	0	3	0	0	2	5	3	0	0	1	0	0
OTUNew.CleanUp.ReferenceOTU726	0	0	1	0	5	0	0	0	0	0	2	0	5	0	0	0	0	0	0	0	2	0	0	1	1	0	7	1	0	0	0	0	5	0	2	1	12	5	6	1	7	1	4	6	0	1	9	1	0
OTUNew.CleanUp.ReferenceOTU3896	43	0	0	0	0	19	0	7	0	0	0	0	0	2	18	0	0	0	0	0	0	13	0	0	0	0	0	4	0	0	0	0	0	8	3	9	12	2	0	0	0	0	1	4	0	0	0	36	0
OTUNew.CleanUp.ReferenceOTU6276	0	0	0	0	0	0	4	0	1	0	0	0	0	8	1	0	14	0	1	1	0	5	0	7	0	0	0	4	16	0	0	0	0	0	62	0	1	0	2	0	0	0	8	0	1	0	0	0	26
OTUNew.CleanUp.ReferenceOTU178	0	0	0	0	0	18	0	10	71	0	46	0	21	20	1	3	7	0	0	0	1	2	0	0	0	0	0	0	0	0	0	0	0	0	0	0	0	0	0	0	0	0	0	0	0	0	0	0	0
OTU30150	0	0	0	0	0	0	9	0	0	0	0	0	0	8	1	0	140	0	0	0	0	41	0	0	0	0	0	0	0	0	0	0	0	0	0	0	0	0	0	0	0	0	0	0	0	0	0	0	0
OTU258367	4	1	34	0	58	4	14	5	4	2	1	0	0	11	2	4	1	0	2	0	0	9	2	4	0	0	6	0	1	0	0	0	4	0	1	0	1	0	1	0	0	0	0	0	0	0	0	0	0
OTU553843	8	5	0	0	0	0	0	23	0	0	0	0	0	0	30	0	0	0	0	0	30	4	0	0	0	0	0	1	0	0	0	0	0	43	5	49	0	0	0	0	0	0	0	0	0	0	0	1	0
OTUNew.CleanUp.ReferenceOTU531	0	0	0	0	1	0	2	0	6	0	2	0	7	6	0	0	4	2	9	0	0	1	0	3	0	0	0	0	0	0	0	0	0	0	0	0	0	0	0	0	0	1	1	10	0	0	2	2	0
OTUNew.CleanUp.ReferenceOTU815	0	0	38	0	46	0	2	0	0	0	0	0	0	0	0	0	1	0	2	0	0	0	0	0	0	0	27	0	3	0	5	0	11	0	1	1	6	0	13	0	10	0	0	0	0	0	0	0	0
OTUNew.CleanUp.ReferenceOTU5058	2	2	0	0	1	21	0	1	25	0	4	0	1	4	4	11	2	3	0	0	2	0	3	0	0	0	0	4	0	2	0	0	0	0	0	1	0	0	0	0	0	1	4	4	5	0	3	1	0
OTU554390	0	0	24	0	10	0	10	0	0	0	0	0	0	5	0	0	17	0	6	0	0	5	0	0	0	0	68	0	1	0	17	0	22	0	0	0	0	0	2	0	0	0	0	0	0	0	0	0	0
OTU148729	0	23	0	48	0	0	0	0	0	1	0	57	0	0	0	2	0	5	0	47	0	0	0	0	0	12	0	0	1	0	0	0	0	0	0	0	0	0	0	0	0	0	0	0	0	0	0	0	0
OTU833193	0	39	0	13	0	0	0	0	0	17	0	101	0	0	0	0	0	6	0	20	0	0	0	0	0	2	0	0	0	0	0	0	0	0	0	0	0	0	0	0	0	0	0	0	0	0	0	0	0
OTU2824905	9	0	23	0	22	0	8	9	0	0	4	0	0	0	0	2	0	0	1	0	1	4	0	0	0	1	8	0	4	0	7	0	8	0	0	1	4	0	18	0	13	0	1	0	1	0	0	0	1
OTU589152	0	0	0	0	0	0	0	0	0	0	0	0	0	0	0	0	0	10	0	0	1	0	7	0	1	12	0	7	0	5	0	65	1	0	0	3	0	16	0	5	0	0	0	0	0	1	0	0	0
OTU2261036	0	0	0	0	0	0	0	0	0	0	0	0	0	3	0	1	0	0	0	0	0	0	0	0	0	0	0	0	0	0	0	0	0	0	0	0	0	3	0	0	0	0	0	4	0	0	0	17	1
OTUNew.CleanUp.ReferenceOTU2863	4	6	0	3	0	1	0	4	0	0	0	5	0	0	0	5	2	4	0	4	5	3	2	0	1	3	0	2	0	9	0	1	1	0	2	19	0	7	0	6	0	4	0	25	0	2	0	3	0
OTUNew.CleanUp.ReferenceOTU1144	0	0	0	0	1	3	0	0	83	0	11	0	48	0	0	0	0	0	1	0	0	0	0	0	0	0	2	0	0	0	0	0	1	0	0	0	0	0	0	0	0	0	3	0	0	0	1	0	2
OTU2641600	0	7	0	0	0	0	3	0	0	0	0	0	0	0	0	0	0	0	0	0	0	5	0	0	0	0	0	0	0	0	0	0	0	0	0	0	1	0	0	0	0	0	0	0	0	0	0	0	2
OTUNew.CleanUp.ReferenceOTU215	0	0	0	0	0	0	0	0	0	0	0	0	0	3	0	2	4	0	0	0	0	30	0	31	0	0	0	10	0	0	0	0	0	0	3	0	3	4	0	0	0	2	30	5	2	0	0	3	25
OTUNew.CleanUp.ReferenceOTU201	0	2	0	0	0	0	0	177	0	0	0	0	1	0	2	0	0	2	0	0	0	0	0	0	2	0	0	1	0	0	1	0	0	0	0	0	0	0	0	4	0	0	0	0	0	0	0	0	0
OTU219551	1	0	0	0	0	0	0	0	0	0	0	0	0	0	0	0	0	0	0	0	0	0	0	0	0	0	0	0	0	0	0	0	0	0	0	0	0	0	0	0	0	0	0	0	0	0	0	0	0
OTU324039	0	0	0	0	0	10	6	2	3	0	0	0	0	0	0	0	0	0	0	0	2	92	0	0	0	0	0	9	16	0	0	0	0	0	5	0	4	0	6	0	1	0	10	0	0	0	0	0	25
OTU583037	0	0	0	0	0	0	0	6	0	0	0	0	0	0	0	0	0	5	0	0	0	0	4	0	3	0	0	2	0	0	0	0	0	5	0	0	0	0	0	10	0	5	0	9	0	9	0	0	0
OTUNew.CleanUp.ReferenceOTU956	9	2	0	0	0	0	0	16	0	1	0	2	0	0	0	2	0	1	0	0	1	3	0	0	2	0	0	0	0	1	0	2	1	0	0	5	0	12	0	5	0	5	0	20	0	3	0	0	1
OTUNew.CleanUp.ReferenceOTU1294	4	1	20	0	17	2	9	3	0	0	0	0	7	1	0	0	3	0	0	0	1	6	0	1	0	0	24	0	1	0	1	0	17	0	0	2	9	0	14	0	25	0	3	0	0	0	0	0	0
OTU150157	2	43	0	2	0	0	0	4	0	22	0	4	0	0	0	5	0	5	0	2	0	1	9	0	5	17	0	2	0	0	0	48	0	0	0	9	0	0	0	1	0	0	0	0	0	1	0	0	0
OTUNew.CleanUp.ReferenceOTU392	0	0	0	0	0	0	0	0	0	0	2	0	0	27	2	0	70	2	0	1	1	10	0	0	3	2	0	1	0	1	0	0	0	0	0	0	0	0	0	0	0	0	0	0	0	0	0	2	0
OTUNew.CleanUp.ReferenceOTU937	1	10	0	3	0	0	0	6	11	0	3	1	6	9	7	1	5	3	0	8	0	0	0	0	1	2	0	0	0	4	0	4	0	0	0	0	0	13	0	6	0	0	0	0	0	7	0	0	0
OTUNew.CleanUp.ReferenceOTU246	0	0	1	0	0	7	47	0	0	0	0	0	0	0	0	0	0	0	0	0	1	4	0	0	0	0	0	0	0	0	0	0	0	0	0	0	0	0	5	0	0	0	1	0	1	0	0	0	0
OTUNew.CleanUp.ReferenceOTU445	0	0	0	0	0	0	0	0	0	3	0	0	0	0	0	0	0	0	0	0	0	4	0	0	0	0	3	0	0	0	0	0	0	0	0	0	0	0	0	0	1	0	16	0	0	0	6	4	2
OTUNew.CleanUp.ReferenceOTU1081	6	3	10	0	6	0	0	5	2	0	0	0	0	1	0	0	0	0	2	0	4	11	2	2	0	1	15	6	4	1	0	0	7	4	12	6	40	0	9	2	10	0	7	0	0	0	0	0	4
OTUNew.CleanUp.ReferenceOTU183	0	0	3	2	0	26	58	0	2	0	0	0	1	0	0	0	0	0	0	0	0	89	0	0	5	0	0	0	0	0	0	0	0	0	0	0	0	0	0	0	0	0	0	0	1	0	0	0	0
OTU1105269	0	2	0	0	0	0	0	2	2	0	2	0	0	4	0	10	4	10	1	11	5	6	13	1	54	11	1	8	0	6	0	7	0	0	0	2	2	4	0	2	0	0	0	0	0	1	0	1	0
OTU4337083	0	0	0	1	0	11	0	15	24	3	15	0	29	1	0	1	2	0	1	5	2	0	5	2	6	2	0	1	2	3	0	3	0	3	7	0	2	3	1	7	0	1	0	0	0	0	0	1	0
OTUNew.CleanUp.ReferenceOTU287	0	0	0	0	0	8	10	2	4	0	2	0	4	4	0	0	24	0	5	0	0	5	0	24	0	0	0	2	11	2	0	3	0	0	0	1	0	0	0	0	0	0	21	0	1	0	3	0	4
OTUNew.CleanUp.ReferenceOTU208	0	0	0	1	0	0	0	0	0	0	0	0	0	0	0	0	0	0	0	0	0	0	0	0	0	2	0	0	0	0	0	10	0	0	0	0	0	0	0	2	0	0	0	0	0	32	0	0	0
OTU1132781	3	0	3	0	5	8	37	1	0	2	0	0	0	0	0	0	2	0	3	0	2	24	1	5	0	0	4	2	1	0	0	0	4	0	0	1	12	0	14	0	3	0	4	4	0	0	0	0	1
OTU3180137	3	1	0	2	0	2	0	18	0	4	0	0	0	0	0	0	0	0	0	0	46	2	1	1	1	1	1	4	0	0	0	2	2	8	5	74	1	1	0	0	0	0	0	3	0	0	0	1	0
OTUNew.ReferenceOTU184	0	16	0	39	0	0	0	0	0	26	0	66	0	0	0	2	0	0	0	41	0	0	0	0	0	0	0	0	0	0	0	0	0	0	0	0	0	0	0	0	0	0	0	0	0	0	0	0	0
OTUNew.ReferenceOTU55	3	2	0	0	0	0	0	6	0	0	0	0	0	0	0	4	0	5	0	4	0	0	16	0	11	1	0	0	0	5	0	0	0	0	0	0	0	0	0	1	0	0	0	0	0	1	0	0	0
OTUNew.CleanUp.ReferenceOTU1556	0	0	0	0	0	0	0	0	0	0	0	0	0	0	0	1	0	0	0	0	0	1	2	0	3	0	0	0	0	1	0	0	0	0	0	2	0	9	0	1	0	0	0	3	0	0	0	1	0
OTUNew.CleanUp.ReferenceOTU4460	0	0	0	0	0	0	0	0	0	0	0	0	0	0	0	0	0	0	0	0	0	0	0	0	0	0	0	0	0	0	0	0	0	0	0	0	0	0	0	0	0	0	0	0	0	0	0	0	0
OTU349934	0	1	0	0	0	0	1	0	0	0	0	0	0	0	0	0	0	0	0	0	0	3	0	0	0	0	0	0	6	0	0	0	2	0	0	0	6	0	2	0	0	0	2	0	0	0	0	0	1
OTU3394221	0	0	0	0	0	0	3	0	0	0	0	1	0	0	0	0	0	0	0	0	0	5	0	1	0	0	0	2	0	0	2	0	0	0	3	0	6	0	1	0	0	0	0	3	0	0	0	0	2
OTUNew.ReferenceOTU378	0	0	0	0	0	0	0	0	0	0	0	0	0	0	0	0	0	0	0	0	80	5	0	0	0	0	0	0	0	0	0	0	0	51	4	49	0	0	0	0	0	0	0	0	0	0	0	0	0
OTUNew.ReferenceOTU536	0	5	0	12	0	0	0	0	0	0	0	0	0	0	0	5	0	3	0	3	1	0	19	0	3	8	0	1	0	4	0	13	0	1	1	1	0	4	0	15	0	0	0	0	0	13	0	0	0
OTUNew.CleanUp.ReferenceOTU456	0	0	0	2	0	0	0	5	0	2	0	2	0	0	0	10	0	7	0	2	0	0	0	0	0	3	0	2	0	8	0	3	0	0	0	2	0	3	0	8	0	0	0	0	0	3	0	3	0
OTU4408390	0	0	57	0	56	0	7	0	4	0	0	0	0	0	0	0	0	0	2	0	0	0	0	0	0	0	5	0	16	0	3	0	5	0	0	0	0	0	0	0	1	0	0	0	0	0	0	0	0
OTUNew.CleanUp.ReferenceOTU1223	2	3	0	0	0	1	0	14	0	2	0	0	0	4	1	1	0	5	0	2	4	2	4	0	3	4	0	2	0	3	0	1	0	1	0	1	0	5	0	7	0	1	0	4	0	5	0	2	0
OTUNew.CleanUp.ReferenceOTU508	0	0	0	0	0	0	0	0	2	0	0	0	0	0	0	4	2	0	0	0	0	0	2	2	5	0	0	1	1	5	0	0	0	0	0	0	0	4	0	0	0	0	3	0	0	1	1	0	1
OTUNew.CleanUp.ReferenceOTU288	0	0	4	0	2	0	0	2	0	0	0	0	1	0	0	0	0	0	0	0	0	7	0	2	2	0	6	0	3	0	1	0	2	0	6	0	75	0	11	0	6	0	18	0	0	0	0	0	2
OTU247661	4	4	0	1	0	1	0	15	1	1	0	2	0	2	8	1	0	9	0	7	11	3	7	0	4	5	0	0	0	3	0	5	0	4	2	11	1	2	0	5	0	3	0	4	0	0	3	5	0
OTUNew.CleanUp.ReferenceOTU488	0	0	0	0	0	0	0	0	0	0	6	0	0	0	0	0	0	0	0	0	0	0	0	0	2	0	0	0	0	0	0	0	0	0	0	0	0	0	0	1	0	0	0	0	0	1	59	0	1
OTUNew.CleanUp.ReferenceOTU247	0	2	21	0	32	0	1	1	0	3	0	0	10	4	0	0	2	1	9	0	0	1	10	1	4	2	30	0	10	0	20	0	2	0	0	4	8	0	0	0	1	0	0	0	0	0	0	0	0
OTUNew.CleanUp.ReferenceOTU1026	0	0	0	0	0	0	0	4	0	0	0	0	0	0	0	0	0	2	0	0	0	0	0	0	0	0	0	0	0	0	0	0	0	0	0	0	0	10	2	0	0	1	0	1	0	0	4	6	0
OTUNew.CleanUp.ReferenceOTU188	2	11	0	9	0	0	0	1	0	10	0	0	0	0	4	7	0	6	0	2	2	3	34	0	21	9	0	0	0	6	0	28	0	0	0	2	0	15	0	10	0	0	0	0	0	0	0	0	0
OTUNew.CleanUp.ReferenceOTU182	0	26	0	0	0	0	0	7	0	22	0	3	0	0	12	9	0	0	0	0	19	0	9	0	21	0	0	0	0	0	0	0	0	3	28	11	4	1	0	1	0	0	0	1	0	0	0	1	0
OTU4458998	0	0	0	0	0	3	1	2	0	0	0	3	0	0	0	1	0	0	0	0	0	1	0	0	0	0	0	53	4	0	0	0	0	0	0	0	4	0	2	0	2	0	4	1	2	0	0	0	0
OTU590493	3	2	0	0	0	2	0	47	18	36	1	0	2	0	8	26	0	2	0	0	0	0	5	0	3	0	0	0	0	0	0	8	0	0	0	0	0	0	0	0	0	0	0	0	0	0	0	0	0
OTUNew.CleanUp.ReferenceOTU249	1	4	0	3	0	0	0	10	0	0	0	3	0	0	10	2	0	15	0	21	17	6	8	0	16	15	0	3	0	16	0	3	0	1	4	13	0	2	0	5	0	0	0	2	0	0	0	0	0
OTUNew.CleanUp.ReferenceOTU232	0	0	4	0	5	6	1	2	3	0	0	0	1	1	0	0	7	0	0	0	0	0	0	21	0	0	3	0	7	0	1	0	5	2	6	0	10	0	11	0	0	0	8	2	0	0	0	1	1
OTUNew.CleanUp.ReferenceOTU224	0	0	26	0	24	5	58	2	0	0	0	0	0	0	2	0	4	0	0	0	3	23	1	0	0	0	3	0	0	0	16	0	1	0	0	0	0	0	5	0	2	0	0	0	0	0	0	0	0
OTU564099	0	0	0	0	0	0	0	2	0	0	0	0	0	0	0	0	4	0	0	0	0	13	0	1	0	0	0	0	0	0	0	0	0	0	15	0	0	0	1	0	0	1	0	0	0	0	0	1	0
OTU1060517	0	0	0	0	0	0	0	0	0	0	0	0	0	0	0	0	0	0	0	0	0	0	0	0	0	0	0	9	0	0	0	0	0	0	0	0	0	0	0	0	0	0	0	0	0	0	23	6	0
OTUNew.CleanUp.ReferenceOTU1815	13	0	14	0	8	2	5	2	3	1	0	0	2	1	0	2	1	0	6	0	5	4	0	4	0	0	15	2	4	0	0	0	5	1	10	3	15	2	18	0	12	1	3	0	0	0	0	0	4
OTU3038080	0	1	0	0	0	0	0	0	0	0	0	0	0	0	0	0	0	0	0	0	0	0	0	0	0	0	0	1	0	0	0	0	0	0	0	0	7	0	0	0	0	0	0	0	0	0	0	0	0
OTU3931106	1	23	0	20	0	0	0	8	0	15	0	7	0	0	4	32	1	2	0	0	0	0	11	0	6	11	0	3	0	9	0	7	0	1	0	0	0	3	0	1	0	0	0	0	0	2	0	0	0
OTU160388	0	45	0	7	0	0	0	39	0	15	0	18	0	0	0	8	0	8	0	6	0	0	2	0	0	6	0	0	0	0	0	26	0	1	2	0	0	0	0	0	0	0	0	0	0	0	0	0	0
OTU4363754	0	0	2	0	4	54	61	3	28	0	1	0	0	0	0	0	4	0	2	0	2	10	0	0	0	0	0	1	0	0	0	0	1	0	0	3	0	0	0	0	3	0	0	0	0	0	0	0	0
OTU4350714	2	40	0	14	0	1	0	15	0	24	0	23	0	0	2	2	0	9	0	10	2	0	3	0	5	3	0	1	0	0	0	0	0	1	1	5	0	3	0	1	0	0	0	0	0	0	2	0	0
OTUNew.CleanUp.ReferenceOTU286	0	0	4	0	7	5	4	3	0	0	4	0	0	20	1	0	36	0	0	0	0	10	0	6	0	0	1	0	8	0	2	0	3	0	8	0	3	0	0	0	1	0	2	0	1	0	6	0	1
OTU68986	0	0	0	0	0	0	0	0	0	0	0	0	0	0	0	0	0	0	0	4	0	0	0	0	0	1	1	0	1	0	0	0	0	0	0	0	1	0	0	7	0	1	0	0	0	2	0	0	0
OTUNew.ReferenceOTU442	0	0	1	0	3	16	0	1	3	0	6	0	13	0	0	0	0	2	10	0	0	0	0	22	0	0	0	6	23	0	0	0	7	0	0	0	14	0	10	0	8	0	19	0	0	0	0	0	6
OTUNew.CleanUp.ReferenceOTU1204	3	0	3	0	18	1	2	0	0	0	3	0	1	1	0	0	0	0	0	0	1	6	0	0	0	0	12	1	0	2	2	0	16	2	3	1	21	2	24	0	20	0	4	0	0	1	2	0	1
OTUNew.CleanUp.ReferenceOTU209	9	45	0	10	0	0	0	46	0	13	0	0	0	0	13	17	0	0	0	19	0	0	9	0	0	1	0	0	0	0	0	0	0	0	0	0	0	0	0	0	0	0	0	0	0	0	0	0	0
OTUNew.CleanUp.ReferenceOTU205	0	0	0	0	0	12	7	0	13	0	14	0	4	45	4	0	63	0	3	0	2	8	0	0	0	0	0	0	0	0	0	0	0	3	4	0	0	0	0	0	0	0	0	0	0	0	0	0	0
OTUNew.CleanUp.ReferenceOTU239	0	0	0	0	0	1	0	0	0	0	2	0	0	9	0	0	8	7	11	0	1	0	0	5	0	0	0	0	0	0	0	0	0	0	0	0	18	2	0	0	2	0	7	0	0	0	9	1	0
OTUNew.CleanUp.ReferenceOTU300	0	1	0	0	0	4	44	2	0	0	0	0	0	0	0	0	0	2	0	0	22	18	9	6	1	0	0	1	12	2	1	8	0	1	41	0	0	0	3	0	0	0	1	0	1	0	0	0	1
OTUNew.CleanUp.ReferenceOTU1629	6	4	0	2	1	6	0	29	3	3	14	7	12	0	0	0	0	0	0	1	8	4	2	0	2	1	0	5	0	0	0	0	0	4	6	22	5	8	2	2	0	1	1	1	0	0	0	1	3
OTU74504	0	0	0	2	0	0	0	0	0	0	0	0	0	0	0	0	0	3	0	2	0	1	0	0	0	12	0	0	0	3	0	0	0	0	0	0	0	6	0	2	0	1	0	0	0	3	0	0	0
OTU11180	9	1	0	1	0	0	0	2	0	0	0	1	0	0	7	6	0	0	0	0	48	0	0	0	0	1	0	0	0	1	0	0	0	8	0	79	0	5	0	0	0	0	0	6	0	0	0	2	0
OTU565484	0	0	0	0	0	0	0	1	0	6	0	0	0	0	0	9	0	6	0	10	1	0	2	0	0	24	0	0	0	1	0	13	0	0	0	1	0	4	0	22	0	0	0	0	0	6	1	0	0
OTU4356685	0	0	0	0	0	0	0	0	1	0	0	0	6	0	0	0	1	0	2	0	0	0	0	6	0	1	4	0	3	0	2	0	4	0	1	0	0	0	0	0	3	0	4	1	0	0	3	0	0
OTUNew.CleanUp.ReferenceOTU3759	0	2	10	0	24	0	2	0	0	0	0	0	0	7	2	0	0	1	10	0	0	0	0	5	0	1	34	0	41	0	13	0	13	0	0	0	0	0	0	0	4	0	0	0	0	0	0	0	0
OTU357791	11	18	0	9	0	5	2	25	0	13	0	0	0	2	7	1	0	3	0	0	4	0	5	0	7	3	0	10	4	0	0	0	0	0	1	5	4	2	4	0	0	0	2	4	3	0	0	1	0
OTU4439135	0	1	0	17	0	0	0	3	0	2	0	35	0	0	7	9	0	4	0	9	7	7	4	1	8	6	0	2	0	2	0	2	0	10	9	11	0	3	2	0	0	0	0	0	0	0	0	0	0
OTUNew.ReferenceOTU450	0	0	20	0	19	0	10	0	0	0	0	0	0	0	0	0	1	4	6	0	0	0	0	1	0	0	5	0	0	0	3	0	4	0	0	0	12	0	13	0	79	0	2	0	0	0	0	0	0
OTUNew.CleanUp.ReferenceOTU206	0	0	0	0	0	0	0	0	0	0	0	0	0	0	0	0	0	0	0	0	0	0	0	0	0	0	0	2	0	0	0	0	0	0	0	0	1	0	0	0	0	0	1	0	0	0	0	0	0
OTUNew.CleanUp.ReferenceOTU268	0	3	0	11	0	0	0	38	7	0	3	1	0	2	8	0	0	8	0	0	0	0	0	0	4	2	0	1	0	8	0	4	0	0	0	0	0	6	0	0	0	0	2	0	0	0	0	0	0
OTU4045626	26	12	0	7	0	7	0	10	13	4	0	5	9	0	0	3	0	11	0	13	2	0	0	0	6	6	0	1	0	0	0	0	0	0	0	1	0	2	0	2	0	1	0	0	0	1	0	0	0
OTU312590	0	7	0	14	0	1	0	0	0	9	0	44	0	0	0	4	0	33	0	25	1	0	0	0	0	38	0	0	0	0	0	0	0	0	0	0	0	0	0	2	0	0	0	0	0	0	0	0	0
OTU4456435	10	8	0	34	0	2	0	12	0	0	0	0	0	2	8	0	9	0	0	0	12	1	4	0	4	0	0	0	0	5	0	9	0	5	1	5	3	7	0	0	0	0	0	2	0	0	0	0	0
OTU555043	0	0	0	0	0	8	0	0	2	0	12	0	4	34	18	3	65	0	0	0	0	5	0	13	0	0	0	0	0	2	0	0	0	0	4	0	0	0	0	0	0	0	0	0	0	0	0	0	0
OTUNew.ReferenceOTU468	7	10	0	9	0	0	0	22	2	11	0	2	1	0	0	13	0	14	0	11	4	0	3	0	6	6	2	2	0	8	0	13	0	0	0	0	0	5	0	0	0	0	1	0	0	0	1	0	0
OTUNew.CleanUp.ReferenceOTU755	6	1	2	0	7	5	1	4	0	0	0	0	0	3	0	0	0	0	0	0	0	8	0	1	1	1	0	2	4	0	0	0	3	0	2	0	38	0	5	3	5	4	3	7	0	0	1	0	5
OTUNew.CleanUp.ReferenceOTU346	0	0	15	0	54	0	7	0	0	0	0	0	0	1	0	0	0	0	1	0	0	3	0	0	0	0	19	0	0	0	0	0	8	0	2	0	21	0	7	0	25	0	1	0	0	0	0	0	0
OTU356532	0	0	4	0	5	11	0	0	15	0	1	0	0	6	0	0	4	0	0	0	0	4	0	0	0	0	1	0	0	0	0	0	1	0	0	0	0	0	0	0	0	0	2	0	0	1	8	0	0
OTU838203	0	0	0	3	0	9	0	1	0	3	0	2	0	1	6	1	0	0	0	1	4	0	1	0	0	4	0	0	2	0	0	0	0	0	0	0	0	3	0	0	0	2	2	1	0	1	5	0	0
OTU822201	0	0	0	0	0	0	0	0	0	0	0	0	0	0	0	0	0	0	0	1	2	0	2	2	12	0	2	1	0	4	0	12	0	0	0	0	0	3	0	3	0	0	0	0	0	0	0	0	0
OTUNew.ReferenceOTU107	1	0	7	0	19	24	59	12	1	0	0	1	0	2	3	1	2	0	1	0	3	13	4	0	1	0	1	3	0	0	0	0	1	0	1	0	1	0	7	0	7	0	1	0	1	0	0	0	0
OTU917498	4	20	0	12	0	0	0	12	0	6	0	0	0	0	1	1	0	0	0	0	0	0	25	0	16	0	0	1	0	0	0	18	0	0	0	0	0	1	0	3	0	0	0	9	0	0	0	4	0
OTU841316	0	4	0	19	0	0	0	0	1	5	0	53	0	0	0	0	0	12	0	33	0	0	0	0	0	22	1	0	0	1	0	2	0	0	0	0	0	0	0	12	0	1	0	0	0	2	0	0	0
OTUNew.CleanUp.ReferenceOTU2851	6	12	0	14	0	0	0	4	0	7	0	19	0	0	1	12	0	7	0	4	4	0	4	0	1	5	0	0	0	1	0	11	0	2	1	26	0	7	0	19	0	2	0	0	0	2	0	0	0
OTU548586	0	0	0	0	0	0	0	0	0	0	0	0	0	0	0	14	0	5	0	0	7	1	0	0	14	1	0	4	0	3	0	0	0	1	2	0	0	3	0	15	0	0	0	0	0	4	0	7	0
OTUNew.ReferenceOTU151	0	0	0	0	0	0	0	0	0	0	0	0	0	0	0	0	0	0	0	0	11	2	0	0	0	0	1	0	0	0	0	0	0	0	0	2	0	0	0	0	0	0	0	0	0	0	3	0	0
OTU818395	2	18	0	5	0	1	0	2	0	9	0	1	0	0	0	6	0	5	0	1	4	1	24	0	7	0	0	1	0	3	0	10	0	0	0	2	0	4	0	2	0	1	0	0	0	0	0	2	0
OTU547615	0	52	0	18	0	0	0	4	0	13	0	35	0	0	0	5	0	9	0	22	0	0	0	0	0	3	0	0	0	8	0	0	0	0	0	0	0	1	0	1	0	0	0	0	0	1	0	0	0
OTUNew.ReferenceOTU454	0	0	24	0	56	2	3	0	0	0	0	0	1	0	0	0	2	0	4	0	0	4	0	0	0	0	9	0	1	0	1	0	14	0	0	0	14	0	5	0	24	0	0	0	0	0	0	0	0
OTUNew.CleanUp.ReferenceOTU218	1	1	0	0	0	0	0	0	0	1	0	0	0	0	0	0	0	3	0	6	0	0	0	0	0	8	0	0	0	13	0	2	0	0	0	0	0	1	0	14	0	1	4	2	0	0	7	2	0
OTUNew.CleanUp.ReferenceOTU210	0	0	0	0	0	11	8	2	0	1	0	0	0	18	29	16	3	0	1	0	7	8	0	5	0	0	2	5	0	0	1	0	2	4	17	1	11	0	15	0	0	0	2	0	0	0	2	0	2
OTU680081	6	6	0	0	3	3	0	19	20	1	2	0	15	0	0	2	1	4	0	0	4	2	8	3	2	0	2	3	5	0	0	1	0	0	2	5	17	4	2	2	3	0	1	6	0	0	0	3	2
OTUNew.CleanUp.ReferenceOTU398	1	8	0	19	0	0	0	8	3	0	0	1	1	0	0	10	0	12	0	5	0	0	5	0	2	8	0	2	0	4	0	12	0	0	0	0	0	2	0	10	0	2	0	2	0	1	0	0	0
OTUNew.CleanUp.ReferenceOTU219	0	6	0	0	0	6	0	14	0	2	0	1	0	1	16	0	0	0	0	0	10	11	0	0	0	0	0	0	0	0	0	0	0	21	17	47	2	6	0	0	0	0	0	0	0	0	0	9	0
OTUNew.CleanUp.ReferenceOTU337	0	0	7	0	15	0	0	0	3	0	0	0	0	0	0	0	0	0	3	0	0	4	0	5	0	0	14	3	8	0	0	0	21	0	5	0	11	0	15	0	17	0	3	0	0	0	6	0	2
OTUNew.CleanUp.ReferenceOTU7678	1	0	12	0	2	1	5	1	1	0	1	1	7	5	0	2	8	3	33	0	3	6	0	12	3	1	15	0	11	0	2	0	1	0	7	3	11	1	4	0	2	0	2	0	0	0	0	1	0
OTU931098	6	0	7	0	6	3	0	0	0	0	0	0	0	0	0	0	6	0	0	0	1	6	0	6	1	0	28	1	8	0	14	0	17	0	0	2	5	0	7	0	7	0	1	0	0	0	13	0	1
OTU227947	0	21	0	43	0	0	0	3	0	22	0	28	0	0	0	2	0	5	0	14	0	0	0	0	0	5	0	0	0	0	0	0	0	0	0	0	0	1	0	3	0	0	0	0	0	1	0	0	0
OTU622842	0	8	0	14	0	0	0	0	0	1	0	13	0	0	0	12	0	11	0	25	0	0	0	0	0	33	0	0	0	0	0	22	0	0	0	0	0	3	0	9	0	0	0	0	0	0	0	0	0
OTU543416	1	1	5	0	2	0	3	0	0	0	0	0	0	1	0	0	0	1	0	0	0	2	0	0	0	0	2	0	0	0	8	0	4	0	0	0	28	0	8	0	19	0	0	0	0	0	0	0	1
OTU4254478	0	0	0	1	0	0	0	1	0	0	0	0	0	0	0	0	0	0	0	0	0	0	0	0	0	0	0	0	0	0	0	0	0	0	0	0	0	0	0	0	0	0	0	0	0	0	0	0	0
OTUNew.CleanUp.ReferenceOTU478	0	0	19	0	47	0	2	0	0	0	0	0	0	0	1	0	0	0	2	0	0	6	0	3	0	0	15	0	2	0	0	0	8	0	3	0	15	0	12	0	19	1	2	0	0	0	0	0	1
OTUNew.CleanUp.ReferenceOTU1120	3	12	0	0	0	1	0	7	50	3	1	1	7	0	2	3	0	1	0	0	3	2	8	0	6	3	0	2	0	0	0	0	0	1	0	4	0	2	0	0	0	2	0	0	0	0	0	1	0
OTUNew.CleanUp.ReferenceOTU306	0	0	0	0	0	0	0	0	0	0	0	0	0	0	0	0	0	0	0	0	0	0	0	0	0	0	0	0	0	0	0	0	0	0	0	0	0	0	0	0	0	0	0	0	0	0	0	0	0
OTUNew.CleanUp.ReferenceOTU1911	2	2	1	0	12	1	7	0	14	1	0	0	15	0	2	0	0	0	2	0	0	2	0	2	1	0	4	0	0	0	0	0	5	0	1	5	4	0	1	0	2	0	1	4	0	0	5	0	0
OTU820287	0	3	0	4	0	3	0	0	0	0	0	0	0	0	0	0	0	8	0	5	1	0	4	0	5	9	0	0	0	1	0	11	0	0	0	0	0	3	0	33	0	0	0	0	0	6	0	0	0
OTUNew.CleanUp.ReferenceOTU633	0	0	0	0	0	0	0	0	0	0	0	0	0	1	0	0	4	0	0	0	0	8	0	0	0	0	0	0	0	0	0	0	0	12	25	1	8	0	0	0	0	1	0	3	0	0	0	6	0
OTUNew.CleanUp.ReferenceOTU793	0	0	0	0	2	1	0	0	60	0	29	0	37	0	1	0	0	0	0	0	0	0	0	0	0	1	1	1	0	0	0	2	0	0	0	0	0	0	3	0	0	0	1	1	0	0	3	0	0
OTUNew.CleanUp.ReferenceOTU1819	0	0	2	0	6	2	2	1	25	0	8	0	3	0	0	0	0	0	1	0	0	2	1	0	0	0	9	0	1	0	0	0	7	0	2	0	6	1	2	1	0	0	4	0	0	0	0	0	0
OTU4341509	3	12	0	6	0	0	0	3	0	0	0	1	0	0	7	4	0	7	0	0	4	3	17	0	3	8	0	1	0	8	0	0	0	13	0	27	0	3	0	11	0	0	0	9	0	1	0	0	0
OTU4304614	0	12	0	46	0	0	0	0	0	7	1	55	0	0	0	0	0	5	0	28	0	0	1	0	0	8	0	0	0	2	0	0	0	0	0	0	0	0	0	1	0	0	0	1	0	0	0	0	0
OTUNew.ReferenceOTU368	0	6	0	5	0	0	0	0	0	0	0	6	0	1	0	23	0	14	0	15	2	0	12	0	21	21	2	1	0	2	0	8	0	0	1	1	0	1	0	0	0	0	0	0	0	1	0	0	0
OTUNew.CleanUp.ReferenceOTU199	0	0	0	0	0	0	0	1	0	0	0	0	0	0	0	0	0	0	0	0	0	1	0	0	0	0	0	0	0	1	0	0	0	0	3	0	0	10	0	0	0	2	0	0	0	0	2	12	0
OTUNew.CleanUp.ReferenceOTU322	3	30	0	5	0	0	0	3	0	9	0	0	0	1	0	17	0	17	0	0	1	0	24	0	3	3	0	0	0	0	0	13	0	0	0	8	0	0	0	9	0	0	0	2	0	1	0	0	0
OTU4370348	0	0	0	0	0	0	0	0	0	0	0	0	0	0	0	0	0	0	1	0	0	0	0	0	0	0	0	1	0	0	0	0	0	0	0	0	2	0	2	0	0	0	0	0	0	0	0	0	0
OTU319778	0	0	0	1	0	0	0	0	0	0	0	0	0	0	0	16	0	16	0	30	0	0	2	0	0	7	0	2	0	7	0	2	0	0	0	0	0	4	0	12	0	1	0	0	0	6	0	0	0
OTU1140018	1	20	0	4	0	2	0	7	0	0	0	40	0	0	2	3	0	9	0	5	0	0	2	0	1	2	0	0	0	0	0	0	0	2	0	3	0	6	0	27	0	0	0	1	0	3	0	0	0
OTUNew.ReferenceOTU300	0	5	0	5	0	0	0	4	0	10	0	1	0	0	0	0	0	32	0	22	4	0	4	0	2	11	0	2	0	0	0	22	0	0	0	0	0	5	0	34	0	0	0	1	0	1	0	0	0
OTUNew.CleanUp.ReferenceOTU251	0	4	0	4	0	0	0	0	0	0	0	0	0	0	0	0	0	20	0	15	0	0	6	0	9	12	0	7	0	10	0	8	0	0	0	0	0	12	0	12	0	0	0	0	0	5	0	0	0
OTUNew.CleanUp.ReferenceOTU1397	10	8	0	0	0	0	0	27	0	7	0	3	0	0	0	0	0	3	0	4	0	0	6	0	6	0	0	0	0	1	0	0	0	1	0	6	0	14	0	13	0	2	0	12	0	1	0	1	0
OTUNew.CleanUp.ReferenceOTU2151	0	0	7	0	5	0	1	0	1	0	0	0	6	2	0	0	0	0	1	0	0	0	0	0	0	0	9	0	0	0	0	0	5	0	1	0	5	0	9	0	6	0	5	0	0	0	3	0	1
OTU545101	0	0	0	0	0	0	0	0	0	0	0	2	1	0	13	5	0	0	0	0	63	11	0	0	6	1	0	0	1	0	0	0	0	23	11	18	3	0	1	0	0	0	0	0	1	0	0	5	0
OTU346656	0	0	0	0	0	0	3	0	0	0	0	0	0	0	0	0	0	0	0	1	0	0	0	0	0	0	0	0	0	0	0	0	0	0	0	0	0	0	0	0	0	0	0	0	0	0	0	0	0
OTU806708	0	0	0	0	0	0	2	0	10	0	18	0	57	59	2	0	8	1	2	7	0	1	0	0	0	0	0	0	0	0	0	0	0	0	0	0	0	0	0	0	0	0	0	0	0	0	0	0	0
OTU832623	0	19	0	4	0	0	0	1	0	1	0	0	0	0	0	6	0	4	0	11	0	0	0	0	0	14	0	0	0	10	0	13	0	0	0	0	0	22	0	11	0	1	0	4	0	12	0	0	0
OTUNew.CleanUp.ReferenceOTU7091	4	2	0	0	0	1	0	73	0	1	0	0	0	3	0	1	0	3	0	3	4	4	4	0	4	2	0	11	0	6	0	0	0	3	0	3	0	3	0	2	0	1	0	1	0	0	0	3	0
OTUNew.CleanUp.ReferenceOTU203	1	4	0	0	3	9	15	0	0	0	0	0	0	2	0	0	6	0	3	0	0	20	0	6	0	0	0	14	14	0	0	0	2	0	21	0	7	0	5	0	0	0	17	0	0	0	0	0	10
OTUNew.CleanUp.ReferenceOTU1269	1	1	12	0	21	3	4	0	2	2	2	0	0	1	2	0	7	0	1	0	0	21	0	18	0	0	5	0	1	0	4	0	12	0	0	5	5	0	6	1	8	0	3	0	0	0	0	0	0
OTU349369	1	2	0	0	0	0	0	4	0	1	0	0	0	0	2	0	0	0	0	0	58	0	0	0	3	1	0	4	0	0	0	0	0	14	6	44	0	8	0	0	0	0	0	4	0	0	0	0	0
OTU3883044	2	23	0	1	3	0	0	10	3	28	2	15	0	4	0	14	0	4	0	0	0	2	14	0	6	6	0	3	1	0	0	0	1	1	4	0	0	0	0	0	0	0	1	0	0	0	0	0	0
OTU2443007	0	17	0	0	0	0	0	1	0	8	0	0	0	0	0	40	0	7	0	3	0	0	8	0	0	11	0	0	0	3	0	28	0	0	0	0	0	0	0	6	0	0	0	2	0	0	0	0	0
OTU832898	0	24	0	19	0	0	0	0	0	26	0	43	0	0	0	0	0	30	0	21	0	0	0	0	0	1	0	0	0	0	0	1	0	0	0	0	0	0	0	0	0	0	0	0	0	0	0	0	0
OTUNew.CleanUp.ReferenceOTU2200	1	0	0	0	0	3	0	0	5	0	1	0	2	0	0	0	0	0	0	0	0	0	0	0	1	0	0	0	0	0	0	0	0	0	3	4	0	0	1	0	0	4	0	30	0	0	4	0	2
OTUNew.CleanUp.ReferenceOTU254	0	2	0	0	0	68	9	4	53	1	8	0	5	3	5	0	1	1	0	0	0	0	0	0	0	0	0	0	0	0	0	0	0	0	0	0	0	0	0	0	0	0	0	0	0	0	0	0	0
OTUNew.CleanUp.ReferenceOTU196	0	0	0	0	2	28	134	0	0	0	0	0	0	0	0	0	1	0	0	0	0	0	0	0	0	0	0	0	0	0	0	0	0	0	0	0	0	0	0	0	0	0	1	0	0	0	0	0	0
OTUNew.CleanUp.ReferenceOTU202	0	0	0	6	0	0	0	0	0	0	0	0	0	0	0	0	0	0	0	0	0	0	0	0	0	0	0	0	0	0	0	0	0	0	0	0	1	0	0	0	0	0	0	0	0	0	0	0	0
OTU849585	2	1	2	6	0	8	9	1	13	0	0	0	0	0	0	0	0	0	0	0	2	3	0	0	0	0	0	36	2	0	0	0	0	0	0	2	3	0	0	0	0	0	1	2	5	0	0	0	0
OTUNew.CleanUp.ReferenceOTU636	1	6	0	6	0	0	0	2	0	4	0	0	0	0	1	5	0	1	0	4	6	4	21	0	28	2	0	1	0	7	0	10	0	5	4	7	0	11	0	5	0	0	0	0	0	0	0	1	0
OTU4314531	0	0	7	0	31	0	1	0	0	0	0	0	0	0	0	0	0	0	0	0	2	7	0	0	0	0	10	1	0	0	0	0	15	0	1	0	21	0	35	1	24	0	1	0	0	0	0	0	0
OTU4320373	1	84	0	1	0	0	0	24	0	0	0	0	0	4	50	0	0	0	0	0	0	0	0	0	0	0	0	0	0	0	0	0	0	0	0	0	0	0	0	0	0	0	0	0	0	0	0	0	0
OTU555568	0	0	14	0	23	1	1	6	1	0	0	0	0	1	0	0	0	0	0	0	0	9	2	2	0	1	4	0	1	0	6	0	11	0	1	1	11	0	29	0	15	0	0	0	0	0	0	0	0
OTUNew.CleanUp.ReferenceOTU767	0	6	0	3	0	0	0	0	0	0	0	2	0	0	0	2	0	2	0	3	0	0	3	1	2	0	0	0	0	0	0	0	0	0	0	0	0	0	0	0	0	0	0	0	0	0	4	0	0
OTUNew.CleanUp.ReferenceOTU518	1	0	4	0	8	1	6	3	1	0	3	0	3	3	2	0	5	0	1	0	0	10	4	1	1	0	20	0	6	0	0	1	5	1	1	0	8	0	6	2	1	0	6	0	0	0	5	0	0
OTUNew.CleanUp.ReferenceOTU1080	0	0	3	0	5	0	0	0	0	0	0	0	0	1	0	0	0	0	2	0	0	11	0	0	0	0	8	1	5	0	0	0	2	0	6	0	59	0	9	0	2	0	8	0	0	0	0	0	3
OTUNew.CleanUp.ReferenceOTU5618	0	0	33	1	45	5	14	0	3	0	0	0	0	0	0	0	0	0	0	0	0	1	0	0	0	0	13	0	1	0	0	0	4	0	1	0	2	0	11	0	3	0	0	0	0	0	0	0	0
OTUNew.CleanUp.ReferenceOTU338	0	4	0	0	0	0	0	0	0	0	1	0	0	55	26	6	40	0	0	0	0	6	0	0	0	2	0	0	0	0	0	7	0	0	0	1	0	0	0	0	0	0	0	0	0	0	0	5	0
OTUNew.CleanUp.ReferenceOTU583	0	0	0	0	0	0	0	0	0	0	0	0	0	0	0	0	0	1	0	0	0	0	0	0	0	0	0	0	0	0	0	0	0	0	0	0	0	0	0	0	0	1	1	1	0	1	5	2	1
OTU765193	0	0	0	0	0	0	0	3	2	0	0	0	0	0	0	0	0	0	0	0	0	0	0	1	2	1	0	0	0	0	1	0	0	0	0	0	0	2	0	3	0	0	1	6	0	0	2	1	0
OTUNew.ReferenceOTU516	0	0	71	0	77	0	2	0	0	0	0	0	0	0	0	0	0	0	0	0	0	0	0	0	0	0	0	0	0	0	0	0	0	0	0	0	0	0	0	0	0	0	0	0	0	0	0	0	0
OTUNew.ReferenceOTU611	0	0	0	0	0	0	0	0	0	0	0	0	0	0	0	0	0	5	0	0	0	0	0	0	0	0	0	0	0	6	0	9	0	0	0	0	0	0	0	24	0	2	0	0	0	47	0	0	0
OTUNew.ReferenceOTU463	1	0	0	0	0	0	0	11	0	6	0	0	0	0	0	0	0	2	0	0	38	6	0	0	0	0	0	0	0	1	0	0	0	6	6	74	0	0	0	0	0	0	0	0	0	0	0	3	0
OTUNew.CleanUp.ReferenceOTU820	5	2	0	1	0	4	0	14	1	0	0	1	2	0	1	0	5	1	0	1	6	6	1	0	0	2	1	0	3	1	0	1	0	2	2	11	11	10	3	6	0	2	2	11	0	0	3	0	5
OTUNew.CleanUp.ReferenceOTU785	2	0	0	0	0	3	0	0	96	1	19	0	23	0	0	0	0	0	0	0	0	0	0	0	0	0	1	0	0	0	0	1	0	0	0	1	0	0	0	1	0	0	0	2	0	0	0	0	0
OTUNew.CleanUp.ReferenceOTU236	2	0	0	9	0	0	0	2	0	0	0	0	0	0	0	0	0	13	0	1	0	0	0	0	5	9	0	0	0	0	0	10	0	0	0	0	0	3	0	5	0	0	0	0	0	8	0	0	0
OTU809056	0	1	0	3	0	0	0	0	0	0	0	0	0	0	0	36	0	5	0	10	0	1	0	0	32	3	0	5	0	5	0	9	0	0	0	2	0	6	0	3	0	0	0	0	0	2	0	0	0
OTU1110303	0	0	9	0	27	1	5	3	2	0	0	0	0	5	0	0	4	0	0	0	0	6	0	0	0	0	5	2	7	0	5	0	10	0	1	0	12	0	8	0	4	0	6	0	0	0	0	0	3
OTUNew.CleanUp.ReferenceOTU944	5	0	1	0	3	5	1	7	68	0	9	0	25	5	0	0	1	0	2	0	7	14	0	0	0	1	0	2	1	0	0	0	0	2	1	1	0	0	0	0	0	0	0	0	0	0	0	0	0
OTUNew.CleanUp.ReferenceOTU6240	2	3	0	5	0	0	0	7	0	0	1	1	0	0	0	0	1	7	0	6	1	0	3	0	2	5	0	0	0	5	0	4	0	1	0	7	0	3	0	5	0	0	0	12	0	1	1	4	1
OTUNew.CleanUp.ReferenceOTU321	0	1	0	8	0	0	0	0	2	0	0	2	0	0	0	0	0	20	0	15	1	0	0	0	6	16	0	0	0	1	0	0	0	0	0	0	0	0	0	0	0	0	0	0	0	0	0	0	0
OTU1139892	1	1	0	2	0	5	0	7	4	0	6	7	27	0	0	0	2	5	0	5	2	0	1	0	3	1	0	4	0	0	0	3	0	3	1	0	0	0	0	12	0	0	0	0	0	1	0	0	0
OTU351106	0	8	0	0	0	0	2	1	1	0	0	0	0	0	0	1	16	0	1	0	2	1	1	0	0	0	0	1	2	2	0	0	0	0	3	0	2	0	0	0	0	1	2	0	0	0	10	0	0
OTU155521	4	8	0	4	3	0	2	0	14	1	3	8	4	4	0	0	0	3	0	14	3	2	0	0	0	1	0	0	0	3	0	0	0	0	4	3	0	3	0	18	0	0	1	0	0	2	0	0	0
OTU281206	0	0	0	0	0	2	1	0	0	0	0	0	0	0	0	0	3	0	0	0	2	4	0	0	0	0	0	0	0	0	0	0	0	0	0	0	32	0	0	0	4	0	36	0	0	0	17	41	14
OTUNew.ReferenceOTU259	1	7	0	4	0	0	0	6	10	10	0	0	2	0	0	27	3	3	0	2	11	4	12	0	12	1	0	0	0	4	0	16	0	1	0	5	0	5	0	0	0	1	0	9	0	0	0	0	0
OTUNew.CleanUp.ReferenceOTU225	0	0	0	0	0	0	13	0	0	0	0	0	0	0	0	0	0	0	0	0	0	0	0	0	0	0	0	0	0	0	0	0	0	0	0	0	23	0	0	0	0	0	0	0	0	0	0	0	0
OTUNew.CleanUp.ReferenceOTU509	0	0	0	0	0	2	0	0	6	0	7	0	8	2	3	0	0	0	0	0	0	5	0	0	0	0	0	1	2	0	0	0	0	0	1	0	0	0	0	0	0	0	0	1	0	0	10	0	0
OTU2427666	0	1	0	4	0	0	0	2	0	0	0	0	0	0	0	0	0	9	0	23	0	0	0	0	5	10	0	0	0	10	0	18	0	0	0	0	0	1	0	20	0	0	0	0	0	8	0	0	0
OTU1054	4	19	0	7	0	0	0	7	0	13	0	5	0	0	0	16	0	2	0	5	0	0	2	0	10	9	0	1	0	2	0	10	0	3	0	4	0	4	0	8	0	1	0	5	0	4	0	0	0
OTU588419	0	46	0	5	0	0	0	0	0	7	0	0	0	0	0	8	0	21	0	47	0	0	0	0	7	18	0	0	0	0	0	0	0	0	0	0	0	0	0	0	0	0	0	0	0	0	0	0	0
OTU4363694	0	0	6	0	13	3	27	0	0	0	0	0	0	0	0	0	3	0	1	0	1	40	0	0	0	0	17	2	3	0	2	0	5	0	0	0	7	0	8	0	0	0	14	0	0	0	0	0	2
OTU695976	0	1	0	7	0	2	0	3	20	5	4	0	0	0	0	0	0	0	0	1	0	0	0	0	19	0	0	1	0	2	0	0	0	0	0	0	0	1	0	0	0	0	0	0	0	0	0	0	0
OTUNew.ReferenceOTU498	1	0	5	0	0	0	6	0	0	0	0	0	0	0	0	0	0	0	1	0	1	8	0	2	0	0	7	0	6	1	1	0	1	0	8	0	34	0	4	0	2	0	17	0	0	0	0	0	3
OTUNew.CleanUp.ReferenceOTU1064	0	0	4	0	5	3	1	1	25	0	4	0	14	4	0	0	1	2	0	0	0	0	0	2	0	0	6	3	0	0	0	0	5	0	0	0	2	0	0	1	1	0	0	0	0	0	1	0	1
OTU141105	0	1	0	0	0	0	0	0	0	0	0	0	0	0	0	0	0	0	0	0	0	0	0	0	0	0	0	0	0	0	0	0	0	0	0	0	0	0	0	0	0	0	0	0	0	0	0	0	0
OTU4481307	0	0	9	0	2	2	23	0	0	0	0	0	0	0	0	1	1	0	1	0	0	16	0	0	0	0	0	0	1	0	0	0	1	0	0	0	0	0	2	0	0	0	0	0	0	0	0	0	0
OTU350845	0	1	0	23	0	0	0	0	0	0	0	6	0	0	0	3	0	3	0	4	0	0	0	0	0	6	1	0	0	4	0	20	0	0	0	0	0	0	0	31	0	0	0	0	0	2	0	0	0
OTUNew.CleanUp.ReferenceOTU216	0	0	0	2	0	0	0	0	0	0	0	0	0	0	1	0	0	18	0	49	0	0	0	0	6	19	0	1	0	0	0	4	1	2	0	2	0	0	0	16	0	1	0	0	0	4	0	0	0
OTUNew.CleanUp.ReferenceOTU2554	0	0	0	0	2	0	0	0	14	1	19	0	78	0	0	0	0	0	2	0	0	0	0	1	0	0	4	7	1	0	2	0	1	0	0	0	0	0	1	0	3	0	1	1	0	0	5	0	1
OTUNew.CleanUp.ReferenceOTU429	4	2	0	1	0	0	0	0	1	0	1	0	0	0	7	3	0	4	0	7	33	2	5	3	8	4	0	4	0	2	0	2	0	17	16	17	0	10	0	1	0	0	0	0	0	0	0	0	0
OTUNew.CleanUp.ReferenceOTU1276	2	0	0	0	5	1	0	11	1	0	0	3	0	1	0	1	1	5	0	0	0	3	3	3	0	5	0	0	2	0	0	0	0	4	8	16	8	5	1	4	0	2	0	17	0	1	0	0	1
OTUNew.CleanUp.ReferenceOTU378	0	0	0	0	0	0	0	0	0	0	0	0	0	0	0	0	0	0	0	0	0	0	0	0	0	0	0	1	2	0	0	0	0	0	0	0	0	4	0	0	0	0	0	0	0	0	0	0	0
OTUNew.CleanUp.ReferenceOTU969	1	1	1	0	0	2	0	0	0	0	1	0	12	0	0	0	0	0	0	0	1	0	0	0	0	0	2	0	2	0	0	0	0	1	0	0	6	4	0	0	0	2	0	3	0	0	10	0	1
OTU548109	14	15	0	2	0	2	0	6	0	2	0	2	0	0	4	7	0	10	0	5	4	1	13	0	4	11	0	0	0	7	0	10	0	1	0	5	1	3	0	11	0	0	0	1	0	1	0	1	0
OTU230842	1	0	0	0	0	0	0	1	0	0	0	0	0	0	0	0	0	0	0	0	0	0	2	0	0	0	0	0	0	0	0	2	1	0	0	0	1	0	0	1	0	3	0	2	0	0	5	0	0
OTU141607	10	20	0	8	0	0	0	3	12	0	1	16	14	0	3	0	0	10	0	12	0	1	0	0	0	3	0	3	0	1	0	0	0	0	0	0	0	1	0	3	0	0	0	0	0	2	0	0	0
OTUNew.CleanUp.ReferenceOTU291	7	4	0	24	0	0	0	48	0	1	0	20	0	0	0	0	0	3	0	21	0	0	2	0	0	7	0	0	0	1	0	7	0	0	0	1	0	0	0	2	0	0	0	0	0	1	0	0	0
OTU724030	0	1	0	0	4	2	0	2	3	0	0	0	3	0	1	0	0	0	0	0	0	0	0	0	0	3	0	0	0	0	0	0	0	0	0	0	4	0	0	0	0	0	1	7	0	1	11	0	0
OTU812095	0	0	0	0	0	0	0	0	0	0	0	0	0	0	0	0	0	1	0	0	4	0	4	11	45	9	1	7	0	14	0	39	0	1	0	0	0	0	0	9	0	0	5	0	0	0	0	0	0
OTU684320	0	24	0	8	0	0	0	4	0	17	0	1	0	0	0	13	0	2	0	0	0	0	15	0	15	10	0	1	0	2	0	4	0	0	0	0	0	0	0	1	0	0	0	0	0	1	0	0	0
OTU834910	0	2	0	31	0	0	0	1	0	8	0	50	0	0	0	0	0	12	0	44	0	0	1	0	0	7	0	0	0	0	0	0	0	0	0	0	0	0	0	0	0	0	0	0	0	0	0	0	0
OTU4431649	1	0	0	0	13	0	0	0	39	0	9	0	16	0	0	0	0	0	0	0	0	0	0	0	0	0	1	7	0	0	0	0	0	0	3	1	1	0	0	0	1	0	0	5	0	0	0	0	1
OTUNew.ReferenceOTU204	0	0	6	0	22	6	24	0	0	0	0	0	0	0	0	0	10	0	0	0	0	32	0	1	0	0	0	0	0	0	0	0	0	0	0	1	3	0	0	0	5	0	0	0	0	0	0	0	0
OTUNew.CleanUp.ReferenceOTU277	0	16	0	23	0	0	0	0	0	9	0	58	0	0	0	1	0	3	0	33	0	0	0	0	0	11	0	0	0	0	0	0	0	0	0	0	0	0	0	2	0	0	0	0	0	0	0	0	0
OTUNew.CleanUp.ReferenceOTU2800	3	1	3	0	7	0	0	0	0	0	0	0	0	0	0	0	0	0	0	0	4	4	8	0	0	0	4	0	4	0	1	0	25	0	2	6	29	0	18	2	22	0	1	0	0	0	0	0	0
OTU8204	0	0	0	0	0	0	0	0	0	0	0	0	0	0	0	0	0	0	0	0	0	0	0	0	0	0	0	0	0	0	0	0	0	0	0	0	0	0	0	0	0	0	0	0	0	0	0	0	0
OTUNew.CleanUp.ReferenceOTU250	12	2	9	1	0	0	2	0	3	1	6	0	2	34	3	0	20	0	1	1	2	1	0	1	0	1	1	0	0	0	2	0	1	0	0	0	0	0	0	0	0	0	0	0	0	0	3	0	0
OTUNew.CleanUp.ReferenceOTU197	0	0	4	0	0	6	41	0	0	0	0	0	0	20	1	0	15	0	0	0	3	47	0	0	0	0	0	0	0	0	0	0	1	0	5	0	6	0	2	0	0	0	3	0	0	0	0	0	0
OTU838102	0	13	0	15	0	0	0	0	0	5	0	7	0	0	0	5	0	2	0	19	0	0	7	0	4	9	0	1	0	1	0	3	0	0	0	4	0	2	0	4	0	0	0	1	0	1	0	0	0
OTU132656	0	0	0	0	0	0	0	0	0	0	0	0	0	0	0	0	0	0	0	0	0	0	0	1	32	10	4	4	0	31	0	34	0	0	0	0	0	5	0	6	0	0	2	0	0	0	0	0	0
OTUNew.ReferenceOTU163	0	0	0	0	0	3	29	0	0	0	0	0	0	0	0	0	0	0	3	0	0	52	0	24	0	0	0	0	7	0	1	0	0	0	32	0	0	0	1	0	0	0	1	0	0	0	0	0	1
OTUNew.CleanUp.ReferenceOTU2731	1	7	0	4	1	2	0	3	1	5	0	12	0	3	5	4	0	16	0	18	1	0	2	0	1	15	0	0	0	1	0	14	0	0	0	1	0	3	0	11	0	0	0	0	0	4	0	0	0
OTUNew.CleanUp.ReferenceOTU281	0	0	0	0	0	0	0	0	0	0	0	0	0	0	0	0	0	0	0	0	0	0	0	0	0	0	0	0	0	0	0	0	0	0	0	0	0	0	0	4	0	0	0	0	0	8	0	0	0
OTUNew.CleanUp.ReferenceOTU237	0	0	0	0	0	0	0	0	0	0	0	0	0	0	0	0	0	2	0	7	0	0	0	0	6	2	0	0	0	1	0	17	0	0	0	0	0	0	0	7	0	0	0	0	0	0	0	0	0
OTU816157	6	0	0	0	0	4	0	23	0	0	0	0	0	2	1	0	0	0	0	0	1	0	0	0	4	0	0	0	0	0	0	0	0	0	0	0	0	0	0	0	0	0	1	0	0	1	10	1	0
OTUNew.ReferenceOTU487	4	1	3	8	13	6	6	20	2	7	3	5	1	4	1	5	0	3	2	0	3	6	2	0	2	2	3	1	3	1	1	3	0	1	0	2	5	1	4	0	3	0	0	2	0	0	0	2	0
OTUNew.CleanUp.ReferenceOTU1743	0	0	1	0	1	0	0	0	0	0	3	0	0	0	0	0	1	0	2	0	0	0	0	0	0	0	3	0	3	0	0	0	1	0	2	0	13	0	6	0	0	0	3	1	0	0	30	1	3
OTUNew.CleanUp.ReferenceOTU1372	0	28	0	5	0	0	0	2	0	11	0	39	0	0	1	5	0	4	0	5	0	0	5	0	0	4	0	0	0	7	0	4	0	0	0	3	0	3	0	25	0	0	0	0	0	1	0	0	0
OTUNew.CleanUp.ReferenceOTU979	5	3	0	0	0	0	0	1	0	0	0	0	0	0	0	27	0	4	0	0	0	0	0	0	1	1	0	2	0	1	0	0	0	0	0	0	0	13	0	0	0	5	1	0	0	0	0	0	0
OTUNew.CleanUp.ReferenceOTU4443	27	3	0	0	0	1	0	67	0	0	0	0	0	0	3	0	0	0	0	0	0	1	2	0	0	0	0	0	0	3	0	8	0	1	2	6	0	4	0	5	0	0	0	5	0	3	0	3	0
OTUNew.CleanUp.ReferenceOTU1487	0	0	1	0	0	0	1	2	25	0	2	0	0	3	1	0	2	0	0	1	1	1	0	0	0	0	0	4	0	0	0	0	1	0	0	1	3	2	0	12	0	4	0	5	0	3	3	0	2
OTUNew.CleanUp.ReferenceOTU420	0	6	0	0	0	0	0	0	0	5	0	5	0	0	41	0	0	0	0	0	30	3	2	0	13	0	0	0	0	0	0	0	0	4	0	28	0	2	0	0	0	0	0	9	0	0	0	0	0
OTUNew.CleanUp.ReferenceOTU284	0	0	0	0	0	0	0	0	0	0	0	0	0	0	0	0	0	0	0	0	0	0	0	0	0	0	0	0	0	0	0	0	0	0	0	0	0	0	0	0	0	0	0	0	0	0	0	0	0
OTU4343390	6	16	0	17	0	12	0	15	0	3	0	21	0	0	3	0	0	5	0	9	5	0	10	0	2	4	0	2	0	0	0	2	0	1	0	3	0	1	0	3	0	0	0	0	0	3	0	0	0
OTU237232	6	1	2	1	0	5	1	11	3	1	0	0	0	1	7	8	6	11	6	1	5	8	3	2	4	2	5	1	0	8	3	0	5	0	3	2	8	0	9	3	9	0	0	0	0	0	0	0	0
OTU529782	0	0	0	0	0	0	0	0	0	0	0	0	0	0	0	0	0	0	0	0	0	0	0	0	0	0	0	0	0	0	0	0	0	0	0	0	0	0	0	0	0	0	0	0	0	0	0	0	0
OTU154130	3	6	7	0	11	0	7	0	12	3	0	1	0	2	3	2	8	2	2	10	1	1	3	0	13	1	13	2	5	0	1	1	2	0	0	1	9	2	3	0	4	0	0	2	0	1	0	0	0
OTU246587	2	10	0	2	0	0	0	4	0	4	0	0	0	0	2	12	0	1	0	0	49	2	1	0	5	9	0	2	0	0	0	6	0	15	5	1	0	0	0	0	0	0	0	3	0	0	0	2	0
OTU607760	0	20	0	10	0	0	0	1	0	28	0	1	0	0	3	29	0	0	0	1	0	0	20	0	5	6	0	0	0	0	0	2	0	0	0	0	0	0	0	1	0	0	0	0	0	1	0	0	0
OTUNew.ReferenceOTU130	0	16	0	1	0	0	0	31	0	14	0	24	0	0	1	11	0	2	0	0	0	0	18	0	2	30	0	0	0	0	0	0	0	0	0	0	0	0	0	0	0	0	0	0	0	0	0	0	0
OTUNew.ReferenceOTU348	0	0	14	0	18	0	4	0	0	0	0	0	0	0	0	0	1	0	0	0	0	5	0	2	0	0	11	3	3	0	10	1	17	0	0	0	16	0	13	0	25	0	0	0	0	0	0	0	1
OTUNew.CleanUp.ReferenceOTU430	1	0	0	0	0	1	0	4	5	1	0	0	2	0	0	4	0	4	0	7	0	0	5	0	1	11	0	6	0	13	0	0	0	0	0	1	0	0	0	19	0	0	0	0	0	6	0	1	0
OTU2781721	0	0	0	45	1	0	0	0	38	0	2	13	1	0	0	0	0	0	0	5	0	0	2	0	2	0	0	7	0	0	0	0	0	0	0	0	0	0	0	0	0	2	0	12	0	0	0	0	0
OTU3769781	0	3	0	6	0	0	0	0	0	0	0	22	0	0	0	0	0	14	0	26	0	0	0	0	3	7	0	0	0	20	0	18	0	0	0	0	0	6	0	18	0	0	0	0	0	1	0	0	0
OTU135990	2	0	11	0	10	2	8	0	0	0	5	0	0	17	0	0	54	0	0	0	0	8	0	0	1	0	0	0	0	0	0	0	0	1	0	0	0	0	0	0	0	0	0	0	0	0	0	0	0
OTUNew.ReferenceOTU553	0	0	0	0	0	2	0	0	0	0	0	0	0	24	15	25	6	2	0	4	0	8	2	0	0	0	0	0	0	0	0	0	0	0	0	0	0	0	0	0	0	0	0	0	0	0	0	1	1
OTUNew.CleanUp.ReferenceOTU475	0	0	0	0	0	0	0	0	0	2	0	0	0	0	0	0	0	0	0	0	111	2	1	0	2	2	0	0	0	0	0	0	0	12	0	0	0	0	0	2	0	0	0	0	0	0	0	1	0
OTUNew.CleanUp.ReferenceOTU1517	1	12	0	0	0	0	0	5	0	17	0	0	0	4	0	19	0	8	0	0	1	0	13	0	0	2	0	1	0	2	0	19	0	1	5	0	0	0	0	7	0	0	0	0	0	1	0	0	0
OTUNew.CleanUp.ReferenceOTU835	6	0	4	0	10	3	1	2	2	0	5	1	23	0	1	0	0	2	0	0	3	6	5	2	0	0	8	3	1	0	0	0	2	0	4	3	9	0	4	1	4	0	5	6	0	0	0	0	0
OTUNew.CleanUp.ReferenceOTU450	3	12	0	6	0	0	0	1	0	3	0	4	0	0	0	13	0	2	0	0	0	0	30	0	10	10	0	0	0	4	0	19	0	0	0	0	0	1	0	2	0	0	0	0	0	2	0	0	0
OTU755686	4	3	0	0	0	5	0	3	0	12	0	1	0	0	2	4	0	0	0	1	0	1	0	0	6	2	0	0	0	4	0	0	0	10	2	25	0	21	0	0	0	1	0	5	0	0	0	6	0
OTU822548	0	4	0	18	0	0	0	0	0	6	0	42	0	0	0	0	0	8	0	60	0	0	0	0	0	10	0	0	0	0	0	0	0	0	0	0	0	0	0	1	0	0	0	0	0	0	0	0	0
OTU207957	0	0	0	0	0	0	0	0	0	0	0	0	0	0	1	0	0	0	0	0	0	0	0	0	0	0	0	0	0	0	0	0	0	0	0	0	0	0	1	0	1	0	0	0	0	0	0	0	0
OTU4419486	0	0	0	0	0	0	0	1	0	0	0	0	0	0	0	0	0	1	0	0	129	0	0	0	0	2	0	0	0	0	0	0	0	7	0	6	0	1	0	0	1	0	0	0	0	0	0	0	0
OTUNew.CleanUp.ReferenceOTU397	0	0	0	0	0	0	0	0	0	0	0	0	0	0	2	0	0	0	0	0	0	0	0	0	0	0	0	0	0	0	0	1	0	3	0	4	0	1	0	4	0	2	0	5	0	0	3	0	0
OTUNew.CleanUp.ReferenceOTU417	0	0	0	0	0	0	7	0	0	0	5	0	1	30	2	0	65	0	0	0	1	38	0	0	0	0	0	0	0	0	0	0	0	0	0	0	0	0	0	0	0	0	0	0	0	0	0	0	0
OTUNew.CleanUp.ReferenceOTU591	0	0	0	0	0	0	0	0	0	0	0	0	0	0	0	0	0	0	0	0	0	0	0	0	0	0	0	0	0	0	0	0	0	0	0	0	0	0	0	0	0	0	0	0	0	0	1	0	0
OTU343807	0	1	0	0	0	0	0	2	2	0	0	0	0	0	7	0	0	1	0	2	0	0	0	0	0	0	0	0	0	0	0	0	0	0	0	0	0	1	0	0	0	2	0	7	0	2	0	0	0
OTU229051	0	9	3	0	12	0	28	0	0	0	0	0	0	0	0	0	0	0	4	0	0	4	0	0	0	0	18	0	4	0	5	0	0	0	0	0	0	0	2	0	42	0	0	0	0	0	0	0	0
OTU4419990	5	3	6	10	23	0	2	16	6	1	0	2	3	6	19	6	0	7	0	0	2	0	0	0	0	11	7	0	0	2	2	0	1	0	0	3	2	0	0	0	2	0	0	0	0	0	0	0	0
OTU101670	0	13	0	42	0	0	0	0	0	34	0	38	0	0	0	0	0	0	0	13	0	0	0	0	0	7	0	0	0	0	0	0	1	0	0	0	0	0	0	0	0	0	0	0	0	0	0	0	0
OTU814752	0	25	0	21	0	0	1	0	0	3	0	76	0	0	0	0	0	6	0	9	0	0	0	0	0	7	0	0	0	0	0	0	0	0	0	0	0	0	0	0	0	0	0	0	0	0	0	0	0
OTUNew.CleanUp.ReferenceOTU494	3	3	0	0	0	0	0	0	0	1	0	0	0	0	0	0	0	0	0	0	0	0	1	0	11	4	0	4	0	0	0	5	0	2	0	0	0	5	0	4	0	0	0	0	0	0	0	2	0
OTUNew.CleanUp.ReferenceOTU903	3	0	0	0	0	0	0	0	0	0	0	1	0	0	0	0	0	0	0	0	1	0	1	0	0	2	0	0	0	0	0	0	0	0	4	12	2	2	0	1	0	6	2	18	0	2	2	1	0
OTU4475292	3	2	0	0	0	0	1	0	0	0	0	0	2	0	0	0	1	0	0	0	0	2	1	3	0	0	3	8	8	0	1	0	3	0	3	8	43	0	24	2	2	0	14	0	0	0	0	0	6
OTUNew.CleanUp.ReferenceOTU7799	2	3	0	0	0	0	0	4	0	1	0	0	0	1	50	0	0	0	0	0	15	6	4	0	0	0	0	0	0	0	0	0	0	41	4	12	4	0	0	0	0	0	0	0	0	0	0	0	0
OTUNew.CleanUp.ReferenceOTU230	1	2	3	2	7	20	40	1	0	6	0	3	0	8	0	1	0	0	1	0	2	5	2	0	6	0	0	0	0	0	0	0	0	1	1	0	0	0	17	0	1	0	0	0	1	0	0	0	0
OTUNew.CleanUp.ReferenceOTU453	0	0	0	0	0	0	0	0	0	0	0	0	0	0	0	0	0	0	0	0	0	0	0	0	0	0	0	0	0	0	0	0	0	0	0	0	0	0	0	0	0	0	0	0	0	0	0	0	0
OTUNew.ReferenceOTU423	6	0	0	0	0	4	0	7	43	0	7	0	14	0	0	1	0	0	0	2	1	1	5	1	0	0	0	1	0	3	0	0	0	0	0	10	0	3	0	3	0	0	2	3	1	2	0	0	1
OTUNew.CleanUp.ReferenceOTU543	0	0	0	0	0	0	0	0	0	0	0	0	0	0	0	0	0	7	0	0	1	0	6	0	2	1	0	0	1	6	0	0	0	3	0	6	2	12	0	0	0	4	3	0	0	2	4	6	1
OTUNew.CleanUp.ReferenceOTU255	5	1	0	0	0	0	0	97	0	0	0	0	0	0	1	0	0	0	0	0	1	0	0	0	0	1	0	0	0	0	0	0	0	1	0	39	0	0	0	0	0	0	0	0	0	0	0	0	0
OTUNew.CleanUp.ReferenceOTU642	10	25	0	1	0	0	0	6	0	9	0	4	0	0	18	1	0	2	0	3	29	1	18	0	0	1	0	0	0	0	0	0	0	11	0	0	0	0	0	0	0	1	0	0	0	0	0	4	0
OTUNew.CleanUp.ReferenceOTU348	0	0	0	0	0	0	0	0	0	0	0	0	0	0	0	0	0	0	0	0	0	0	0	0	0	0	0	0	0	0	0	0	0	0	0	0	0	0	0	0	0	0	0	0	0	0	0	0	0
OTU172264	0	1	0	2	0	0	0	18	0	0	0	0	0	0	7	34	0	1	0	8	1	2	20	0	4	4	0	0	0	4	0	13	0	2	0	1	0	5	0	4	0	1	1	0	0	0	0	0	0
OTU1107973	0	0	0	0	0	0	0	1	0	0	0	0	0	0	0	0	0	0	0	0	0	0	0	0	0	0	0	0	0	2	0	0	0	0	0	0	0	0	0	0	0	1	0	10	0	3	0	0	0
OTUNew.CleanUp.ReferenceOTU1289	3	0	1	0	7	5	3	2	36	0	12	0	28	7	0	1	0	2	1	0	9	17	0	0	0	0	0	2	1	0	0	0	0	0	3	0	1	0	0	0	1	0	0	0	0	0	0	0	0
OTUNew.CleanUp.ReferenceOTU243	1	0	26	0	20	3	28	0	0	7	0	0	0	6	0	0	0	0	0	0	0	3	0	0	0	0	0	0	1	0	0	0	0	0	0	0	0	0	5	0	14	0	0	0	0	0	0	0	0
OTUNew.CleanUp.ReferenceOTU308	0	0	0	3	0	0	0	2	0	0	0	3	0	0	0	0	0	1	0	3	0	0	0	0	1	0	0	0	0	8	0	15	0	0	0	0	0	3	0	0	0	1	0	5	0	0	0	0	0
OTU260281	0	2	29	0	32	1	24	2	0	1	0	0	0	4	0	0	0	0	3	0	0	5	1	0	1	0	9	0	0	0	0	0	3	0	0	0	4	0	2	0	9	0	0	0	0	0	0	0	0
OTUNew.CleanUp.ReferenceOTU927	0	0	5	0	13	2	0	0	0	0	1	0	0	0	0	0	2	0	1	0	0	3	0	3	0	0	13	0	0	0	1	0	15	0	0	2	11	0	5	0	12	0	8	0	0	0	0	0	4
OTUNew.CleanUp.ReferenceOTU253	0	0	0	0	0	0	0	0	0	0	0	0	0	0	0	0	0	0	0	0	0	0	0	0	0	0	0	0	0	0	0	0	0	0	0	0	0	0	0	0	0	1	0	0	0	0	0	0	0
OTUNew.CleanUp.ReferenceOTU238	0	0	0	0	0	0	0	0	0	0	0	0	0	0	0	0	0	1	0	0	1	2	1	0	6	0	0	0	0	17	0	5	0	0	0	6	0	62	0	13	0	0	0	5	0	3	0	1	0
OTUNew.CleanUp.ReferenceOTU6070	3	2	0	3	0	0	0	5	0	1	0	1	0	0	3	3	0	7	0	8	3	1	1	0	0	3	0	1	0	3	0	0	0	1	0	2	0	10	0	10	0	0	0	6	0	4	0	2	0
OTU370251	0	11	0	11	0	0	0	2	1	2	0	22	0	0	0	4	0	5	0	3	1	0	4	0	4	0	0	10	0	2	0	1	0	0	0	2	0	4	0	8	0	0	0	0	0	0	0	0	0
OTU553746	1	13	0	9	0	0	0	0	0	15	0	4	0	0	1	14	0	5	0	2	0	0	3	0	4	20	0	0	0	0	0	16	0	0	0	0	0	2	0	16	0	0	0	1	0	4	0	0	0
OTU225408	2	23	0	0	0	4	0	6	0	0	0	41	0	7	0	1	0	0	0	0	0	0	13	0	2	1	0	4	0	2	0	3	0	0	6	2	0	0	0	0	0	0	1	0	0	0	0	0	0
OTU313493	0	0	0	0	0	4	8	0	0	0	0	0	0	0	0	0	0	0	0	0	0	7	0	0	0	0	0	11	13	0	2	0	0	0	1	0	11	0	14	0	0	0	10	0	0	0	0	0	4
OTUNew.ReferenceOTU255	2	7	0	1	0	0	0	0	0	4	0	1	0	0	0	1	0	1	0	3	2	0	0	0	1	1	0	0	0	3	0	0	0	3	0	16	1	3	0	3	0	2	0	26	0	1	0	1	1
OTUNew.ReferenceOTU476	0	0	0	0	0	0	0	0	0	0	0	0	0	0	0	0	0	4	0	0	0	0	2	0	6	8	0	1	0	3	0	93	0	0	0	0	0	15	0	5	0	0	0	1	0	0	0	0	0
OTUNew.ReferenceOTU573	1	0	1	0	6	0	4	1	17	0	1	0	0	0	0	0	0	0	0	0	0	19	0	0	0	0	3	6	2	0	0	0	9	0	5	1	31	0	13	0	13	0	2	1	0	0	0	0	2
OTUNew.CleanUp.ReferenceOTU313	0	0	0	0	0	0	1	0	0	0	0	0	0	0	0	0	0	0	0	0	0	0	0	0	0	0	0	0	0	0	0	0	0	0	7	0	1	0	1	0	0	0	0	0	0	0	0	0	0
OTUNew.CleanUp.ReferenceOTU1207	5	0	2	1	1	5	1	5	4	0	0	0	0	0	0	0	1	0	2	0	2	11	3	0	0	0	7	0	3	0	0	0	10	6	4	3	20	2	6	1	5	0	9	0	0	0	0	0	8
OTUNew.CleanUp.ReferenceOTU3161	0	1	0	1	0	0	0	1	0	0	0	0	0	0	0	0	0	5	0	0	0	0	5	0	4	11	0	2	0	9	0	27	0	0	0	1	1	9	1	13	0	0	1	0	0	2	0	1	0
OTUNew.CleanUp.ReferenceOTU2386	0	0	0	0	2	11	1	3	31	0	8	0	39	4	0	0	0	0	0	0	1	3	0	0	0	0	0	4	0	0	0	0	0	1	2	0	3	0	0	0	0	0	0	0	0	0	3	0	0
OTUNew.CleanUp.ReferenceOTU1006	1	0	0	0	0	0	0	3	0	0	0	0	0	0	0	0	0	1	0	0	2	0	2	0	0	1	0	0	0	1	0	0	0	2	0	6	2	2	0	3	0	4	0	30	0	0	4	1	2
OTU172515	0	0	0	0	0	3	10	0	0	0	0	0	0	0	0	0	0	0	1	0	1	13	0	15	0	0	0	3	33	0	9	0	3	0	27	0	5	0	6	0	0	0	6	1	0	0	0	0	5
OTU563900	3	0	0	0	0	10	0	17	13	0	39	0	12	0	1	1	0	1	0	0	1	2	1	3	6	3	2	1	4	1	0	0	0	1	0	1	1	4	1	2	0	0	0	1	0	0	0	1	0
OTUNew.CleanUp.ReferenceOTU3350	0	0	4	0	5	2	16	0	0	0	0	0	0	0	0	0	0	0	6	0	0	7	0	1	0	0	15	2	3	0	23	0	14	0	2	0	9	0	19	0	1	0	13	0	0	0	0	0	0
OTUNew.CleanUp.ReferenceOTU263	0	0	0	0	0	11	0	8	0	0	0	0	0	0	0	0	1	8	0	0	0	0	13	0	44	0	0	8	0	2	0	0	0	1	0	0	0	3	0	2	0	0	0	1	0	0	0	0	0
OTUNew.CleanUp.ReferenceOTU267	0	0	0	3	0	0	0	0	0	0	0	0	0	0	57	0	0	0	0	0	42	0	2	0	0	0	0	0	0	0	0	0	0	0	0	30	0	0	0	0	0	0	0	0	0	0	0	3	0
OTUNew.CleanUp.ReferenceOTU4803	5	0	1	0	2	1	2	1	1	0	0	0	0	2	0	0	2	1	1	0	0	5	1	0	0	0	2	1	7	0	0	0	1	1	12	1	12	0	3	0	0	0	0	9	0	0	1	1	1
OTU818188	0	0	0	0	3	18	82	0	1	0	0	0	0	0	0	0	0	0	3	0	2	3	0	0	0	0	4	0	0	0	0	0	2	0	0	0	7	0	7	0	0	1	6	0	1	0	0	0	1
OTU578477	0	0	0	0	0	1	10	0	0	0	0	0	0	0	0	0	0	0	0	0	0	2	0	0	0	0	0	0	7	0	47	0	15	0	0	0	1	0	19	0	8	0	1	0	0	0	0	0	0
OTU534327	0	5	0	0	0	1	0	0	0	0	0	0	0	0	3	0	0	13	0	2	11	0	11	0	10	6	0	4	0	1	0	0	0	0	3	6	0	0	0	2	0	2	0	0	0	1	0	0	0
OTU838452	0	14	0	18	0	0	0	2	0	5	0	27	0	0	0	18	0	11	0	30	0	0	2	0	0	10	0	0	0	1	0	3	0	0	0	0	0	0	0	0	0	0	0	0	0	0	0	0	0
OTUNew.CleanUp.ReferenceOTU226	0	9	0	2	0	0	0	27	0	5	0	4	0	0	0	7	0	1	0	5	1	0	30	0	21	6	0	0	0	1	0	7	0	0	0	0	0	0	0	5	0	0	0	0	0	0	0	0	0
OTU559623	2	2	0	0	0	1	0	3	2	0	0	12	2	0	0	0	0	0	1	1	2	0	0	0	0	4	0	0	0	0	1	0	0	0	0	0	0	2	0	2	0	1	8	1	0	0	1	0	1
OTU146168	0	3	0	2	0	0	0	1	0	10	0	1	0	0	0	11	0	4	0	5	0	0	7	0	22	0	0	2	0	13	0	0	0	0	0	0	0	8	0	1	0	0	0	0	0	2	0	0	0
OTU1140434	0	0	0	0	0	0	0	0	0	0	0	0	0	0	0	0	0	0	0	0	0	0	0	0	0	0	0	2	0	0	0	0	0	0	0	0	0	0	0	0	0	0	0	0	0	0	9	0	0
OTU318462	0	6	0	0	0	0	0	5	0	8	0	0	0	0	4	0	0	0	0	2	22	0	17	0	6	0	0	0	0	0	0	3	0	12	0	12	0	16	0	1	0	0	0	1	0	0	0	1	0
OTU694372	0	0	0	0	0	0	0	0	0	0	0	0	0	0	0	0	0	1	0	0	0	0	1	0	0	0	0	0	0	0	0	0	0	0	0	0	0	0	0	0	0	0	1	3	0	0	24	0	0
OTUNew.CleanUp.ReferenceOTU881	1	0	2	0	11	1	1	0	9	0	7	0	8	0	0	1	2	0	3	0	0	5	0	6	1	0	9	3	1	0	0	0	8	1	1	0	12	0	6	1	11	0	0	2	0	0	2	0	0
OTUNew.CleanUp.ReferenceOTU11211	3	4	0	2	0	1	0	5	0	0	0	1	0	3	0	1	0	6	0	1	1	0	2	0	4	1	0	0	0	1	0	3	0	0	3	6	0	1	0	7	1	2	0	8	0	3	2	7	0
OTUNew.CleanUp.ReferenceOTU349	0	0	0	0	0	0	0	0	0	0	0	0	0	0	0	0	0	0	0	0	0	0	0	0	0	0	0	0	0	0	0	0	0	0	0	0	0	0	0	1	0	0	0	1	0	0	5	0	0
OTU593437	1	3	1	1	0	0	0	10	0	1	0	0	0	1	6	1	0	0	0	1	14	7	3	1	3	0	0	0	1	2	0	2	0	16	3	33	7	2	2	3	1	0	1	2	0	0	0	2	0
OTU1104738	0	0	0	0	0	1	0	6	39	0	3	1	19	1	0	9	0	8	0	0	5	0	4	0	11	0	0	3	0	5	0	3	0	4	0	1	0	0	0	3	0	0	2	5	0	0	0	0	0
OTUNew.CleanUp.ReferenceOTU552	3	14	0	0	0	3	0	0	7	3	0	21	0	0	0	3	0	1	0	16	0	0	5	0	16	1	0	0	0	2	0	0	0	0	0	1	2	0	0	1	0	1	0	0	1	1	1	0	1
OTUNew.CleanUp.ReferenceOTU2469	0	0	0	0	2	2	0	0	86	0	5	0	26	0	0	0	0	0	0	0	0	1	0	0	0	0	0	0	0	0	0	0	0	0	1	0	0	0	0	0	0	0	0	0	0	0	0	0	2
OTUNew.CleanUp.ReferenceOTU331	0	0	0	0	0	2	5	0	0	0	0	0	0	0	1	0	0	0	0	0	0	3	0	2	0	0	2	13	3	0	0	0	0	0	27	0	6	0	16	0	0	0	47	0	1	0	0	1	9
OTU127630	0	0	0	1	0	0	0	0	0	0	0	0	0	0	0	0	0	1	0	2	0	0	1	0	0	1	5	0	0	0	0	0	0	0	0	0	0	3	0	0	0	0	0	4	0	1	0	4	0
OTU345362	0	0	0	0	0	0	0	0	3	0	0	0	1	3	0	0	0	0	0	0	0	0	1	0	6	0	0	0	0	0	0	0	0	0	0	0	0	0	0	0	0	0	0	0	0	0	0	0	0
OTU547808	5	0	0	0	0	0	0	0	0	0	0	1	0	0	4	0	0	0	0	0	1	0	8	0	0	0	0	0	0	0	0	0	0	1	0	63	0	16	0	5	0	0	0	5	0	0	0	6	0
OTU156530	0	0	0	1	0	0	0	0	0	0	0	0	0	0	0	0	0	1	0	0	4	0	3	0	3	0	0	0	0	3	0	0	0	0	0	0	0	4	0	6	0	2	0	0	0	4	0	0	0
OTUNew.ReferenceOTU234	14	0	0	0	1	0	0	6	6	0	0	0	1	0	1	0	0	2	0	0	2	0	2	0	2	0	0	3	0	1	0	0	0	0	0	0	0	2	0	5	0	1	0	39	1	1	0	0	0
OTUNew.CleanUp.ReferenceOTU1969	1	1	0	0	0	0	0	0	2	0	0	0	4	0	0	0	0	0	0	0	0	1	0	0	0	0	1	0	0	0	0	0	0	0	0	0	0	0	0	1	0	0	1	1	0	0	13	0	1
OTUNew.CleanUp.ReferenceOTU1904	0	3	0	0	0	0	0	0	0	0	0	0	0	0	8	1	0	2	0	0	9	1	5	0	31	3	0	8	0	22	0	0	0	4	5	9	0	3	0	0	0	0	0	0	0	0	0	0	0
OTUNew.CleanUp.ReferenceOTU925	6	0	3	0	5	0	0	1	0	1	0	0	0	0	0	0	0	0	0	0	5	0	0	0	2	0	1	0	0	0	0	0	1	1	3	9	37	0	16	0	8	0	0	5	0	0	0	0	0
OTU4018589	0	0	0	0	0	0	0	0	0	0	0	0	0	0	0	0	0	0	0	0	0	0	0	0	0	0	0	0	0	0	0	0	0	0	0	0	1	0	0	0	0	0	0	0	0	0	0	0	0
OTU343908	0	0	0	0	0	0	0	0	0	0	0	0	0	0	0	0	0	1	0	0	11	1	3	0	5	0	0	0	0	1	0	0	0	30	0	82	0	0	0	0	0	0	0	0	0	0	0	0	0
OTU246635	2	0	0	0	0	0	0	2	0	0	0	0	0	0	0	0	1	0	0	0	1	0	6	0	15	4	0	1	0	0	0	0	0	0	0	0	0	3	0	3	0	0	0	0	0	1	0	0	0
OTU2999126	1	2	0	1	1	1	0	3	1	3	3	1	5	1	1	0	0	5	0	1	2	5	3	0	2	4	6	0	2	1	1	0	1	0	0	3	0	12	1	6	1	1	0	9	0	1	1	1	0
OTUNew.CleanUp.ReferenceOTU449	0	10	0	0	0	0	0	0	0	0	0	0	0	0	0	5	0	0	0	0	0	0	0	0	4	0	0	0	0	0	0	1	0	0	0	0	0	6	0	0	0	1	0	0	0	0	0	0	0
OTUNew.CleanUp.ReferenceOTU1292	1	0	1	0	15	0	2	0	0	0	0	0	0	1	0	0	1	0	0	0	0	5	0	0	1	0	4	0	2	0	0	0	15	0	5	0	28	0	27	0	17	0	1	0	0	0	0	0	2
OTU549760	1	5	0	1	0	0	0	8	0	1	0	0	0	0	36	3	0	0	0	0	19	7	0	0	0	0	0	0	0	0	0	0	0	44	3	7	1	0	0	0	0	0	0	0	0	0	0	0	0
OTU824164	0	7	0	33	1	0	0	0	2	10	0	31	0	0	0	0	1	6	0	19	0	0	0	0	1	6	0	0	0	0	0	2	0	0	0	0	0	0	0	11	0	0	0	0	0	0	0	0	0
OTUNew.ReferenceOTU512	1	0	0	0	3	10	2	2	34	0	10	0	33	5	0	0	2	0	0	0	2	8	1	0	0	0	2	0	0	0	0	0	0	0	1	0	3	0	1	0	0	0	0	0	0	0	0	0	0
OTUNew.CleanUp.ReferenceOTU6268	1	21	0	17	0	0	0	2	0	15	0	20	0	0	0	4	0	16	0	30	0	0	1	0	0	9	0	0	0	0	0	0	0	0	0	0	0	0	0	0	0	0	0	0	0	0	0	0	0
OTUNew.CleanUp.ReferenceOTU515	0	0	0	0	0	0	0	0	0	0	0	0	0	0	0	0	0	2	0	0	0	0	0	0	1	6	0	0	0	0	0	5	0	0	0	1	0	15	0	7	0	0	0	0	0	0	1	0	0
OTUNew.CleanUp.ReferenceOTU441	0	0	0	0	0	0	0	0	0	0	0	0	0	0	0	0	0	0	0	0	0	0	0	0	0	0	0	0	0	0	0	0	0	0	0	0	0	4	0	0	0	0	0	0	0	0	1	0	0
OTUNew.CleanUp.ReferenceOTU329	0	21	0	27	0	0	0	1	0	34	0	14	0	0	0	1	0	10	0	22	0	0	0	0	0	5	0	0	0	0	0	0	0	0	0	0	0	0	0	1	0	0	0	0	0	0	0	0	0
OTUNew.CleanUp.ReferenceOTU858	0	40	0	0	0	0	0	0	0	14	0	5	0	0	0	11	0	7	0	0	0	0	4	0	5	4	0	0	0	2	0	7	0	0	0	0	0	0	0	5	0	0	0	3	0	0	0	0	0
OTUNew.CleanUp.ReferenceOTU716	0	0	0	0	0	0	0	2	0	0	0	0	0	0	0	0	0	1	0	2	3	0	1	0	0	0	0	0	0	1	0	0	0	0	0	2	0	2	0	0	0	1	0	0	0	1	3	0	0
OTU179639	1	1	0	4	0	0	0	0	0	0	0	0	0	0	0	0	0	0	0	0	4	0	2	0	1	0	0	4	0	0	0	1	0	6	0	2	0	0	0	0	0	1	0	0	0	0	0	0	0
OTUNew.CleanUp.ReferenceOTU293	0	0	0	0	2	39	22	4	16	0	0	0	0	24	0	3	6	0	0	0	2	11	0	0	0	0	0	1	0	0	0	0	0	3	0	0	0	0	0	0	0	0	0	0	1	0	0	0	0
OTUNew.CleanUp.ReferenceOTU704	0	0	0	0	2	0	0	0	4	0	0	0	0	0	0	0	0	0	0	0	0	0	0	0	0	0	0	0	0	0	0	0	0	0	0	0	1	2	0	0	0	1	1	3	0	0	3	0	1
OTUNew.CleanUp.ReferenceOTU602	0	0	0	1	0	0	0	0	0	0	0	0	0	0	0	0	0	5	0	12	0	0	0	0	0	0	0	0	0	0	0	5	0	0	0	0	0	0	0	15	0	2	0	0	0	0	0	0	0
OTUNew.CleanUp.ReferenceOTU469	0	0	0	0	1	25	33	22	35	0	0	0	3	2	0	0	0	0	0	0	0	0	0	0	0	0	0	0	0	0	0	0	0	0	0	0	0	0	0	0	0	0	1	0	0	0	0	0	0
OTU291770	6	2	14	0	17	5	19	2	4	1	0	0	0	3	1	2	1	2	5	0	0	1	4	12	0	0	11	0	0	1	0	0	2	0	0	1	1	0	0	0	1	0	1	0	0	0	0	0	1
OTU747101	0	0	0	0	0	0	0	0	0	0	1	0	0	0	0	5	0	0	0	2	2	1	0	1	1	0	0	2	1	2	0	1	1	0	0	0	0	0	0	0	0	0	0	0	0	1	9	0	1
OTU251292	2	11	0	4	0	0	0	6	0	4	0	40	0	0	0	1	0	1	0	5	0	0	0	0	8	0	0	1	0	0	0	2	0	4	0	0	0	7	0	4	0	2	0	0	0	0	0	0	0
OTU335943	0	0	0	0	0	0	4	0	1	0	0	0	0	6	0	0	4	0	1	0	0	3	1	1	0	0	3	0	3	0	0	0	2	0	2	0	0	0	0	0	0	0	4	0	0	0	17	0	0
OTUNew.CleanUp.ReferenceOTU248	0	0	0	0	0	0	0	0	0	0	0	0	0	2	0	0	15	0	0	0	2	25	0	3	0	0	0	2	0	0	0	0	0	2	22	0	1	0	0	0	0	0	1	0	0	0	0	59	0
OTUNew.CleanUp.ReferenceOTU2412	0	0	0	0	0	0	0	0	17	0	24	0	65	0	0	0	1	0	2	0	0	0	0	0	0	0	0	0	0	0	0	0	0	0	0	0	0	0	0	0	0	0	1	0	1	0	1	1	0
OTUNew.ReferenceOTU147	0	0	0	0	0	0	0	0	0	0	0	0	0	0	0	0	0	0	0	0	0	0	0	0	0	0	0	0	0	0	0	0	0	0	0	0	0	0	0	3	0	0	0	0	0	0	0	0	1
OTUNew.CleanUp.ReferenceOTU301	0	0	0	0	3	0	1	0	1	0	0	0	0	0	2	0	0	0	3	0	0	1	0	1	0	0	3	0	6	0	3	0	5	0	0	0	10	0	25	0	0	0	0	1	0	0	0	0	0
OTUNew.CleanUp.ReferenceOTU896	0	31	0	8	0	0	0	3	0	6	0	64	0	0	0	7	0	0	0	12	0	0	0	0	0	0	0	0	0	1	0	0	0	0	0	0	0	0	0	0	0	0	0	0	0	0	0	0	0
OTUNew.CleanUp.ReferenceOTU1358	1	3	0	0	0	0	0	5	0	0	0	1	0	0	0	1	0	12	0	1	2	0	0	0	0	3	0	2	0	3	0	0	0	0	2	11	0	6	0	16	0	3	0	16	0	5	0	0	0
OTU810334	0	0	0	0	0	0	0	1	3	0	0	0	0	0	0	3	0	0	0	0	0	0	2	0	1	2	0	0	0	0	0	0	0	0	0	0	0	1	0	14	0	0	0	0	0	17	0	0	0
OTU338265	1	0	0	0	0	1	0	2	0	0	0	0	0	0	0	0	0	1	0	0	0	0	0	0	0	0	0	0	0	0	0	0	0	0	0	0	0	0	0	2	0	3	0	12	0	0	4	2	1
OTU243374	10	41	0	0	0	3	0	10	1	22	0	0	0	0	0	7	0	3	0	1	0	0	6	0	0	3	0	0	0	0	0	3	0	0	0	4	0	0	0	2	0	0	0	0	0	0	0	0	0
OTU550871	1	1	12	0	15	3	9	1	0	0	0	0	0	8	2	0	18	0	5	0	0	13	0	9	0	0	3	0	3	0	0	0	5	1	6	0	5	0	3	0	0	0	0	0	0	0	0	0	0
OTU292058	4	3	0	0	0	0	0	11	0	5	0	0	0	0	7	4	0	7	0	2	0	0	3	0	1	2	0	1	0	9	0	7	0	1	0	6	0	6	0	15	0	0	0	0	0	2	0	0	0
OTU4339358	0	29	0	29	0	0	0	0	1	0	0	0	0	5	4	1	0	3	0	0	1	0	0	0	0	2	1	0	0	1	0	12	4	0	0	0	2	0	0	0	0	0	0	0	0	0	0	0	1
OTU3423659	3	2	0	0	0	0	0	2	11	0	0	0	0	5	3	2	0	0	0	0	2	2	13	0	20	4	0	10	0	1	0	0	0	4	8	11	0	0	0	1	0	0	1	0	0	0	0	5	1
OTUNew.CleanUp.ReferenceOTU4224	5	7	2	0	2	0	0	0	0	2	1	1	0	0	0	0	0	3	3	0	1	1	1	1	0	0	12	0	1	0	4	0	11	0	1	2	5	2	6	0	39	0	0	0	0	0	0	0	0
OTU584301	13	10	0	6	0	2	0	7	0	0	0	1	0	0	0	6	0	1	0	6	0	0	17	0	9	0	0	1	0	8	0	0	0	9	0	0	0	0	0	4	0	0	0	4	0	0	0	0	0
OTUNew.CleanUp.ReferenceOTU408	0	6	0	26	0	0	0	0	0	2	0	38	0	0	0	0	0	4	0	33	0	0	0	0	0	6	0	0	0	1	0	0	0	0	0	0	0	0	0	5	0	0	0	0	0	1	0	0	0
OTUNew.CleanUp.ReferenceOTU1585	0	0	2	2	3	0	0	0	0	0	0	0	0	0	0	0	0	0	0	0	0	3	0	0	0	0	2	0	2	0	0	0	0	0	0	2	1	1	0	0	0	0	1	0	0	2	6	0	1
OTUNew.CleanUp.ReferenceOTU257	0	0	0	0	0	0	3	0	0	0	3	0	0	0	0	0	9	0	0	0	0	3	0	0	0	0	0	0	4	0	6	0	6	0	2	0	1	0	12	0	0	0	0	0	0	0	5	0	0
OTU1562631	0	0	1	0	1	2	0	4	0	0	0	0	2	1	46	0	0	1	0	3	8	1	8	0	7	0	0	1	0	2	0	0	0	0	0	0	0	2	0	8	0	0	0	1	0	0	2	0	0
OTU834389	0	16	0	2	0	25	0	0	0	0	0	0	0	0	0	11	7	20	0	5	2	10	1	0	4	3	0	0	0	6	0	0	0	3	0	0	0	0	0	0	0	1	0	5	0	0	0	0	0
OTU546165	0	0	1	0	6	0	2	0	7	0	2	0	2	2	1	0	4	0	0	0	0	11	0	7	0	0	3	5	1	0	3	0	4	0	15	0	5	0	8	0	1	0	1	0	0	0	0	1	1
OTU333373	0	2	0	1	0	0	0	0	0	0	0	0	0	5	0	2	2	21	0	7	0	0	3	0	4	6	0	1	0	12	0	12	0	0	0	0	0	3	0	8	0	0	0	0	0	0	0	0	0
OTUNew.CleanUp.ReferenceOTU911	0	0	0	0	0	0	0	0	0	0	1	0	0	0	0	0	0	0	0	0	0	0	0	0	0	0	0	0	0	0	0	0	0	0	0	0	0	0	0	0	0	6	0	4	0	0	1	0	1
OTUNew.CleanUp.ReferenceOTU1473	0	0	17	0	29	4	15	2	0	0	0	0	0	2	0	2	1	0	2	0	1	2	0	0	0	0	7	0	2	0	1	0	13	0	0	0	0	0	2	0	3	0	0	0	0	0	0	0	0
OTUNew.CleanUp.ReferenceOTU347	0	0	0	0	0	2	0	1	3	0	1	0	0	0	0	6	0	0	0	0	0	0	0	0	0	0	0	20	6	0	6	0	0	1	0	0	1	0	0	0	0	0	3	0	6	0	0	0	0
OTU582149	0	0	0	0	0	0	0	0	0	0	0	0	0	0	0	0	0	0	0	0	0	0	0	0	0	0	0	0	0	0	0	0	0	0	0	0	0	0	0	0	0	0	0	0	0	0	0	0	0
OTU573270	0	0	0	0	0	0	1	0	0	0	0	0	0	0	0	0	0	0	0	0	0	0	0	0	0	0	0	0	0	0	0	0	0	0	0	0	1	0	0	0	0	0	0	0	0	0	0	0	0
[truncated: 6,961 more rows]
[truncated: 50 more columns]

## Sheet: Tables D-E
Table D. P-values (B-H corrected) for Spearman's correlation coefficients (ρ) for Y14 surface and bottom samples.
	Depth (m)	DO (mg/L)	NH4 (μM)	NO2+NO3 (μM)	PO4 (μM)	Salinity (ppt)	Temperature (°C)	Chlorophyll a (μg/L)	qPCR Thaumarchaeota (copy/L)	qPCR amoA (copy/L)	G oligotype (CSS normalized)	A oligotype (CSS normalized)	Thaumarchaeota; N. maritimus OTU4369009	Synechococcus; CC9902 OTU557211	Synechococcus; Cyanobium PCC-6307 OTU404788	Synechococcus; Cyanobium PCC-6307 OTU1141722	Alphaproteobacteria; AEGEAN-169 OTU592269	Synechococcus; Cyanobium PCC-6307 OTU4	Synechococcus; CC9902 OTU427495	Flavobacteriaceae OTU779927	Alphaproteobacteria; Rhodobacteraceae; HIMB11 OTU346431	Flavobacteriaceae; NS5 OTU4414717	Alphaproteobacteria; Rhodobacteraceae OTU678713	Flavobacteriaceae; NS5 OTU4404499	Alphaproteobacteria; AEGEAN-169 OTU3156804	Gammaproteobacteria; SUP05 OTU819670	Gammaproteobacteria; HOC36 OTU60638	Thaumarchaeota; Ca. Nitrosopelagicus OTU1584736	Unassigned Bacteria OTU0
Depth (m)	0	2.39714e-16	0.105821	0.000145716	4.97508e-07	1.26785e-36	7.04203e-25	0.00022643	4.06475e-05	0.000574478	8.29296e-08	4.09849e-19	1.50608e-14	0.271846	1.45787e-16	4.05975e-05	7.5093e-07	2.80846e-06	8.9171e-11	1.8536e-17	2.23589e-13	8.13046e-08	4.91858e-15	1.47596e-07	1.47601e-13	1.39833e-21	2.59621e-23	3.91498e-10	2.29622e-06
DO (mg/L)		0	0.000628887	4.48053e-07	2.33502e-15	9.51437e-17	3.5104e-16	0.0764416	4.34662e-13	3.81063e-10	3.23072e-18	3.80648e-20	2.36216e-20	0.055113	4.66081e-07	0.0358899	1.73238e-06	0.0163327	3.50568e-05	1.65933e-09	4.00286e-08	0.000520227	1.05303e-10	6.53634e-06	1.61249e-10	6.16013e-12	4.03137e-19	8.84437e-11	0.0015665
NH4 (μM)			0	0.230378	0.000525524	0.324445	0.893305	0.805296	0.0593655	0.124662	0.485324	0.393561	0.188353	0.345823	0.014571	0.000435093	0.659317	0.000352131	0.0038204	0.182372	0.320452	0.21704	0.0222175	0.00357189	0.0167293	0.5057	0.0732758	0.381808	9.01911e-05
NO2+NO3 (μM)				0	5.53256e-17	0.0015665	6.04537e-07	0.0194347	3.26004e-09	4.08923e-07	1.11842e-12	4.24544e-08	3.00816e-12	8.50342e-17	0.464531	0.000156558	3.31325e-11	0.00164892	2.28934e-08	0.0124563	1.90461e-07	1.13892e-11	3.36217e-05	0.254176	0.492037	2.40748e-05	4.37112e-05	2.1873e-10	0.0015665
PO4 (μM)					0	4.02991e-09	9.99942e-11	0.821269	2.03966e-10	3.13073e-08	7.95071e-15	5.93203e-14	3.11195e-16	2.60709e-06	0.000197497	0.945989	2.39465e-11	0.674205	6.05738e-08	5.86631e-07	1.58178e-09	2.87715e-09	1.23276e-09	0.0562205	4.2369e-05	6.04225e-11	1.13892e-11	4.60241e-13	0.838144
Salinity (ppt)						0	3.96916e-28	3.26911e-05	5.28333e-05	0.000602641	1.46758e-09	6.41426e-24	2.33502e-15	0.390429	1.21626e-18	7.4472e-05	1.44345e-08	5.16683e-06	3.47992e-08	1.40167e-22	1.07064e-15	2.69214e-10	4.24465e-18	1.21702e-07	1.22406e-17	6.44829e-28	1.2586e-23	2.74711e-14	4.58285e-05
Temperature (°C)							0	0.0964584	5.41797e-08	4.78121e-06	3.92603e-14	2.49466e-26	1.95964e-19	0.000551939	3.73506e-11	0.0988739	2.07865e-12	0.0294849	7.20846e-09	4.47618e-14	1.4478e-13	7.47343e-12	2.35201e-12	0.000146847	2.97128e-10	4.46524e-26	2.90749e-22	1.44335e-19	0.0374291
Chlorophyll a (μg/L)								0	0.040928	0.0420985	0.74605	0.117586	0.888324	0.000495732	7.36865e-05	7.09738e-07	0.565896	9.78476e-06	0.516086	0.000676194	0.113279	0.753187	0.000390524	0.0727021	0.00353551	0.329313	0.144407	0.938671	0.00346547
qPCR Thaumarchaeota (copy/L)									0	5.15125e-64	1.22004e-15	3.37919e-11	7.40811e-21	1.56854e-06	0.265073	0.163224	0.0001776	0.213765	2.66285e-06	0.0104573	0.00254916	0.000498405	0.00355312	0.00926959	0.000214537	5.56727e-07	2.09731e-11	1.49726e-09	0.70732
qPCR amoA (copy/L)										0	1.29959e-12	5.59735e-09	3.39511e-16	1.20766e-05	0.494408	0.134818	0.00201461	0.178707	4.22375e-05	0.0321714	0.015681	0.00271121	0.0236052	0.0189458	0.000781781	1.39758e-05	5.83835e-09	9.04478e-08	0.788439
G oligotype (CSS normalized)											0	5.89263e-27	2.99883e-26	1.0033e-08	0.0584346	0.0503661	1.92435e-09	0.0965288	1.92802e-05	9.0757e-05	8.76505e-06	4.19848e-07	1.5543e-05	0.14223	9.47051e-05	1.73851e-09	3.44024e-12	2.33502e-15	0.315608
A oligotype (CSS normalized)												0	9.97541e-29	0.000124002	3.64262e-08	0.486585	6.04225e-11	0.214914	9.69385e-09	2.07865e-12	1.54667e-11	3.53848e-11	2.24677e-11	0.00017192	2.09731e-11	1.6294e-23	4.76833e-24	4.53544e-22	0.12482
Thaumarchaeota; N. maritimus OTU4369009													0	1.53777e-07	0.000452172	0.462306	1.04072e-10	0.725532	1.51792e-09	1.11646e-06	6.68537e-08	1.45477e-08	4.35274e-08	0.00119812	2.85147e-07	9.37696e-20	1.58819e-27	3.31363e-24	0.306888
Synechococcus; CC9902 OTU557211														0	0.277227	2.19451e-13	6.40729e-13	8.59267e-12	9.42463e-08	0.788439	0.000915168	1.04535e-09	0.0131745	4.34231e-06	0.0139204	0.0310202	0.0993893	7.31288e-09	1.70332e-11
Synechococcus; Cyanobium PCC-6307 OTU404788															0	2.30198e-15	0.000135152	2.4164e-19	3.71202e-10	2.25491e-24	1.66298e-17	2.87338e-05	1.17667e-19	4.24544e-08	4.73097e-14	2.76244e-12	3.2457e-10	4.55251e-05	9.58099e-11
Synechococcus; Cyanobium PCC-6307 OTU1141722																0	0.0445797	4.45129e-58	0.21704	3.62491e-08	0.00648794	0.238625	0.000358012	6.56304e-13	1.40641e-10	0.0227649	0.0041536	0.196051	1.39555e-27
Alphaproteobacteria; AEGEAN-169 OTU592269																	0	0.157446	4.57503e-09	1.06228e-06	8.08018e-13	2.72855e-15	3.8128e-13	0.0440655	0.462306	4.61943e-10	8.51176e-06	4.57207e-17	0.0296899
Synechococcus; Cyanobium PCC-6307 OTU4																		0	0.0742588	7.30278e-10	0.000615081	0.649358	5.68755e-05	5.54578e-14	4.57776e-12	0.00225328	0.00108725	0.450187	1.03239e-28
Synechococcus; CC9902 OTU427495																			0	5.31281e-08	8.08793e-12	2.25276e-09	2.6854e-13	0.181832	0.00120524	5.37913e-08	2.22132e-08	8.02547e-09	0.24062
Flavobacteriaceae OTU779927																				0	8.02446e-28	7.44268e-14	4.56553e-21	6.24017e-06	1.08965e-14	3.80205e-15	1.13892e-11	9.65761e-08	2.65451e-05
Alphaproteobacteria; Rhodobacteraceae; HIMB11 OTU346431																					0	3.22286e-21	7.94934e-31	0.0845432	2.22777e-06	2.31532e-13	1.18611e-09	2.57388e-11	0.107364
Flavobacteriaceae; NS5 OTU4414717																						0	1.06764e-10	0.838144	0.00272521	2.65309e-12	1.04039e-06	1.08965e-14	0.0566469
Alphaproteobacteria; Rhodobacteraceae OTU678713																							0	0.105217	1.87044e-05	3.31325e-11	5.56036e-10	3.62147e-10	0.0124603
Flavobacteriaceae; NS5 OTU4404499																								0	9.25078e-28	2.05511e-07	1.38014e-12	0.150652	1.1765e-21
Alphaproteobacteria; AEGEAN-169 OTU3156804																									0	3.70334e-14	1.53129e-18	9.84089e-05	1.93668e-11
Gammaproteobacteria; SUP05 OTU819670																										0	6.76586e-27	2.78069e-19	0.000551939
Gammaproteobacteria; HOC36 OTU60638																											0	1.3959e-15	3.23354e-06
Thaumarchaeota; Ca. Nitrosopelagicus OTU1584736																												0	0.732635
Unassigned Bacteria OTU0																													0
Table E. Spearman's Correlation coefficients (ρ) for Y14 surface and bottom samples.
	Depth (m)	DO (mg/L)	NH4 (μM)	NO2+NO3 (μM)	PO4 (μM)	Salinity (ppt)	Temperature (°C)	Chlorophyll a (μg/L)	qPCR Thaumarchaeota (copy/L)	qPCR amoA (copy/L)	G oligotype (CSS normalized)	A oligotype (CSS normalized)	Thaumarchaeota; N. maritimus OTU4369009	Synechococcus; CC9902 OTU557211	Synechococcus; Cyanobium PCC-6307 OTU404788	Synechococcus; Cyanobium PCC-6307 OTU1141722	Alphaproteobacteria; AEGEAN-169 OTU592269	Synechococcus; Cyanobium PCC-6307 OTU4	Synechococcus; CC9902 OTU427495	Flavobacteriaceae OTU779927	Alphaproteobacteria; Rhodobacteraceae; HIMB11 OTU346431	Flavobacteriaceae; NS5 OTU4414717	Alphaproteobacteria; Rhodobacteraceae OTU678713	Flavobacteriaceae; NS5 OTU4404499	Alphaproteobacteria; AEGEAN-169 OTU3156804	Gammaproteobacteria; SUP05 OTU819670	Gammaproteobacteria; HOC36 OTU60638	Thaumarchaeota; Ca. Nitrosopelagicus OTU1584736	Unassigned Bacteria OTU0
Depth (m)	1	-0.722146	0.171899	0.382941	0.490976	0.909492	-0.82909	-0.372566	0.410904	0.34973	0.518554	0.763036	0.690263	-0.117751	-0.725608	-0.411012	-0.484155	-0.46178	-0.606706	-0.739554	-0.667197	-0.51891	-0.699192	0.509898	0.670889	0.794261	0.813079	0.589328	0.465413
DO (mg/L)		1	-0.347256	-0.492745	-0.705078	-0.728557	0.719192	0.187656	-0.661107	-0.589708	-0.750726	-0.777009	-0.779635	0.202653	0.492061	0.220632	0.47026	0.250503	0.414007	0.571799	0.529452	0.352485	0.604618	-0.446623	-0.599806	-0.635504	-0.76326	-0.606876	-0.323335
NH4 (μM)			1	0.12837	0.352152	0.105804	-0.0142193	0.0269181	0.199045	0.16347	0.0756687	0.0919337	0.140584	0.101272	-0.254614	-0.357113	0.0485324	-0.362354	-0.2974	-0.142484	-0.106778	0.131957	-0.23926	0.299441	0.249566	0.0716777	0.189774	-0.0944035	0.393732
NO2+NO3 (μM)				1	0.732342	0.323174	-0.487717	0.244123	0.563267	0.494302	0.652295	0.528493	0.642522	-0.729418	-0.0791841	0.3812	-0.617547	0.321716	-0.537379	-0.260302	-0.50601	-0.6292	-0.414914	-0.122125	0.0742115	0.421751	0.409202	0.596329	-0.323174
PO4 (μM)					1	0.560584	-0.60533	0.0245848	0.597173	0.533102	0.695474	0.678688	0.720252	-0.463197	-0.375805	0.0068961	-0.621081	-0.0462662	-0.523197	-0.488263	-0.572445	-0.564869	-0.575699	0.201701	0.409909	0.610951	0.629094	0.660514	0.021868
Salinity (ppt)						1	-0.858521	-0.41555	0.405128	0.348476	0.573566	0.819477	0.705145	-0.092675	-0.756714	-0.397824	-0.543694	-0.45094	-0.531591	-0.805536	-0.711299	-0.593967	-0.748968	0.512769	0.74239	0.85656	0.816495	0.685463	0.408086
Temperature (°C)							1	0.176907	-0.524825	-0.452379	-0.682419	-0.84214	-0.767665	0.350823	0.616076	0.175488	0.646336	0.228563	0.553005	0.681265	0.671151	0.633565	0.645074	-0.382687	-0.592796	-0.839611	-0.802072	-0.769474	-0.218889
Chlorophyll a (μg/L)								1	0.215278	0.214044	0.0356856	-0.166452	-0.0151402	-0.353823	0.398129	0.485122	-0.0621977	0.439114	0.0698727	0.345385	0.168386	-0.0344952	0.359754	-0.190248	-0.299931	-0.104663	-0.155573	-0.00812801	-0.300603
qPCR Thaumarchaeota (copy/L)									1	0.976682	0.710253	0.617263	0.785667	-0.471975	-0.119446	0.148824	-0.378251	0.13327	-0.462761	-0.266142	-0.309567	-0.353604	-0.29969	0.270129	0.373866	0.489155	0.622579	0.573251	0.0415627
qPCR amoA (copy/L)										1	0.650852	0.556345	0.719538	-0.435172	-0.0736388	0.159317	-0.316228	0.143878	-0.410054	-0.224928	-0.252009	-0.307751	-0.236849	0.245131	0.341698	0.432382	0.555739	0.517247	0.0295048
G oligotype (CSS normalized)											1	0.847656	0.841256	-0.548482	-0.199835	0.206477	-0.569878	0.176736	-0.426083	-0.393516	-0.441194	-0.49382	-0.430314	0.156487	0.392533	0.571168	0.641182	0.70501	-0.107929
A oligotype (CSS normalized)												1	0.863815	-0.38661	-0.530816	-0.0752695	-0.610965	-0.13281	-0.549	-0.646302	-0.625951	-0.61671	-0.621805	0.379055	0.622603	0.815231	0.820881	0.799865	0.163267
Thaumarchaeota; N. maritimus OTU4369009													1	-0.509224	-0.356109	0.0799084	-0.604824	0.0388936	-0.573011	-0.47759	-0.521742	-0.543515	-0.528074	0.330573	0.499848	0.772091	0.85232	0.822555	0.109886
Synechococcus; CC9902 OTU557211														1	-0.116388	-0.667455	0.657526	-0.632042	0.516586	0.0293701	0.33765	0.577785	0.258219	0.454137	0.256265	-0.226423	-0.175109	-0.552747	0.624909
Synechococcus; Cyanobium PCC-6307 OTU404788															1	0.705452	0.384663	0.766375	0.59008	0.824305	0.740359	0.418158	0.770724	-0.528522	-0.680717	-0.643404	-0.591736	-0.408302	-0.605865
Synechococcus; Cyanobium PCC-6307 OTU1141722																1	-0.211523	0.968521	0.131939	0.530959	0.281404	-0.126169	0.361879	-0.657219	-0.601362	-0.238271	-0.294865	0.13824	-0.853031
Alphaproteobacteria; AEGEAN-169 OTU592269																	1	-0.150849	0.558936	0.478469	0.655288	0.703763	0.662338	0.212109	-0.0797403	-0.587389	-0.441806	-0.733697	0.228185
Synechococcus; Cyanobium PCC-6307 OTU4																		1	0.18906	0.582016	0.347888	-0.0501317	0.403544	-0.679334	-0.63841	-0.313073	-0.333169	0.082104	-0.863159
Synechococcus; CC9902 OTU427495																			1	0.525248	0.632715	0.567909	0.665442	-0.142795	-0.330328	-0.525	-0.537858	-0.55149	-0.125522
Flavobacteriaceae OTU779927																				1	0.855481	0.676743	0.788219	-0.447528	-0.69286	-0.701213	-0.629041	-0.516163	-0.419781
Alphaproteobacteria; Rhodobacteraceae; HIMB11 OTU346431																					1	0.79008	0.878194	-0.183043	-0.465999	-0.666802	-0.57623	-0.62027	-0.171077
Flavobacteriaceae; NS5 OTU4414717																						1	0.604391	0.0220601	-0.307511	-0.64387	-0.478881	-0.692924	0.201259
Alphaproteobacteria; Rhodobacteraceae OTU678713																							1	-0.172307	-0.426741	-0.617548	-0.58521	-0.590435	-0.260182
Flavobacteriaceae; NS5 OTU4404499																								1	0.854682	0.504811	0.650215	0.153269	0.795243
Alphaproteobacteria; AEGEAN-169 OTU3156804																									1	0.68299	0.755248	0.391636	0.623547
Gammaproteobacteria; SUP05 OTU819670																										1	0.84693	0.765462	0.350789
Gammaproteobacteria; HOC36 OTU60638																											1	0.709175	0.459301
Thaumarchaeota; Ca. Nitrosopelagicus OTU1584736																												1	-0.0377063
Unassigned Bacteria OTU0																													1

## Sheet: Tables F-G
Table F. P-values (B-H corrected) for Spearman's correlation coefficients for Y14 bottom samples only.
	Depth (m)	DO (mg/L)	NH4 (μM)	NO2+NO3 (μM)	PO4 (μM)	Salinity (ppt)	Temperature (°C)	Chlorophyll a (μg/L)	qPCR Thaumarchaeota (copy/L)	qPCR amoA (copy/L)	G oligotype (CSS normalized)	A oligotype (CSS normalized)	Thaumarchaeota; N. maritimus OTU4369009	Synechococcus; Cyanobium PCC-6307 OTU404788	Gammaproteobacteria;SAR86 OTU691149	Verrucomicrobia; Chthoniobacteraceae; LD29 OTU3996107	Euryarchaeota; MG II OTU 3134564	Actinobacteria; PeM15 OTU585063	Synechococcus; Cyanobium PCC-6307 OTU1141722	Gammaproteobacteria; SUP05 OTU819670	Unassigned Bacteria OTU0	Alphaproteobacteria; Rhodobacteraceae OTU347569	Gammaproteobacteria;SAR86 OTU275493	Gammaproteobacteria;SAR86 OTU230774	Unassigned Bacteria OTU3	Gammaproteobacteria;SAR86 OTU257395	Alphaproteobacteria; Rhodobacteraceae OTU152417	Synechococcus; Cyanobium PCC-6307 OTU533688	Cyanobacteria;Oxyphotobacteria OTU833871
Depth (m)	0	0.000156653	4.24171e-06	0.699608	0.087595	6.69499e-16	8.92387e-13	2.13983e-05	0.0462982	0.0610921	0.528701	0.000603952	0.136347	5.95768e-05	0.685988	0.643851	0.0958571	8.34014e-05	0.52265	2.11629e-07	0.760101	0.900099	0.00259305	0.353333	0.174676	2.51985e-07	0.178637	0.510121	0.000139423
DO (mg/L)		0	0.259121	2.42969e-05	2.19124e-05	0.010202	0.0713729	0.698924	6.22145e-06	2.15931e-05	2.81044e-06	0.513486	0.0242094	9.05505e-07	0.000150037	0.000890331	1.49004e-06	0.000279925	0.000114817	0.00216242	0.000986329	0.00125793	0.000137223	0.000412444	1.65077e-05	9.68368e-05	0.00751158	0.0119797	0.000860595
NH4 (μM)			0	0.0958571	0.610182	6.03495e-07	4.97483e-06	0.000467935	0.699538	0.75032	0.515015	0.0027405	0.00842702	0.0653266	0.275202	0.495358	0.619539	0.0416929	0.718262	4.29731e-05	0.385275	0.474766	0.957975	0.243097	0.843914	0.000102636	0.0410153	0.528701	0.0602816
NO2+NO3 (μM)				0	9.43052e-12	0.0450082	0.00804964	0.046776	0.0156404	0.0156491	2.21146e-10	1.72995e-05	7.42267e-07	0.00941908	1.96296e-12	3.5531e-10	2.42154e-06	0.116892	2.65184e-10	0.586696	4.19678e-11	3.53262e-07	0.0314361	9.9313e-12	3.09172e-07	0.732053	1.36556e-10	1.23787e-06	0.187759
PO4 (μM)					0	0.759549	0.346962	0.600944	0.00438944	0.00281363	2.53076e-06	0.0242094	0.00196758	0.00742338	1.10743e-07	2.05921e-07	9.53415e-05	0.0497594	1.74688e-06	0.886742	8.50188e-07	0.00134534	0.0253021	7.20868e-06	0.000166065	0.339653	3.46721e-05	0.000467935	0.088532
Salinity (ppt)						0	6.73017e-24	0.000139466	0.230653	0.330731	0.495358	9.60536e-07	0.00759714	0.00320477	0.0601549	0.23797	0.546738	0.0020742	0.394322	3.5531e-10	0.0486443	0.358579	0.0214218	0.0239633	0.724708	1.28394e-07	0.00701331	0.132143	0.000536943
Temperature (°C)							0	0.00115397	0.433952	0.539738	0.26268	8.8411e-08	0.00392633	0.00158444	0.0104751	0.0936241	0.925914	0.000754565	0.336689	2.07399e-11	0.034942	0.21157	0.0809923	0.00649288	0.948902	1.34599e-08	0.00181481	0.046776	0.00250776
Chlorophyll a (μg/L)								0	0.808911	0.760101	0.0298294	0.000284258	0.00515545	0.696426	0.0150134	0.084309	0.111965	0.685988	0.00831772	0.258882	0.00354415	0.00377939	0.215428	0.000603952	0.0149852	0.470129	0.000890814	0.000462381	0.761411
qPCR Thaumarchaeota (copy/L)									0	9.7102e-36	4.68675e-05	0.088532	0.00205447	0.0132158	0.0233961	0.0312442	2.03114e-05	0.0922351	0.0124066	0.136347	0.0350068	0.136113	0.0936241	0.0174628	0.00435499	0.0365963	0.0672336	0.0235845	0.0318863
qPCR amoA (copy/L)										0	9.31216e-05	0.0825568	0.00202944	0.0236733	0.0220938	0.0350068	3.39609e-05	0.148637	0.015936	0.199384	0.037106	0.145746	0.136347	0.0218028	0.00545926	0.0607111	0.0602814	0.0201411	0.0430275
G oligotype (CSS normalized)											0	1.11535e-05	1.16763e-10	1.93148e-05	1.62737e-08	2.07399e-11	6.65219e-09	0.000402394	2.50084e-14	0.405863	2.52323e-12	3.39204e-07	0.0180179	2.65184e-10	2.91272e-12	0.0721198	8.00994e-09	1.06415e-09	0.00354415
A oligotype (CSS normalized)												0	2.78426e-11	0.886684	5.5299e-05	2.97467e-05	0.00880279	0.623692	0.000198116	0.000378726	0.000551108	0.0158185	0.947035	4.1392e-06	0.0333054	0.00664925	0.000129654	4.17784e-05	0.116764
Thaumarchaeota; N. maritimus OTU4369009													0	0.117031	5.7795e-05	3.9066e-08	7.3016e-05	0.170395	1.35701e-07	0.0538591	1.86536e-05	0.00359304	0.0842826	1.44354e-05	0.000572615	0.346962	6.8291e-05	0.000368578	0.988645
Synechococcus; Cyanobium PCC-6307 OTU404788														0	0.0345821	0.00138984	2.25744e-05	2.91272e-12	9.05505e-07	5.67446e-06	0.000409265	0.00307689	0.00831772	0.00924708	2.0217e-08	5.22138e-09	0.0527743	0.0238573	2.25213e-08
Gammaproteobacteria;SAR86 OTU691149															0	8.0045e-08	1.00838e-05	0.220611	1.11526e-08	0.988645	3.49766e-11	7.97334e-11	0.947035	2.47081e-19	9.05505e-07	0.418515	5.12637e-15	2.56652e-09	0.285609
Verrucomicrobia; Chthoniobacteraceae; LD29 OTU3996107																0	8.57134e-05	0.00105497	5.33347e-18	0.678613	1.22467e-10	1.25813e-05	0.0170906	2.3243e-08	1.10743e-07	0.564356	4.56265e-07	7.06543e-07	0.19771
Euryarchaeota; MG II OTU 3134564																	0	0.0169068	4.20246e-06	0.145746	8.17634e-05	0.00177795	0.0150534	1.55711e-05	3.09083e-07	0.0156491	0.000633591	3.46721e-05	0.000306471
Actinobacteria; PeM15 OTU585063																		0	2.09494e-05	0.000191385	0.00356429	0.10234	0.00725746	0.135243	3.95262e-05	1.41222e-06	0.381139	0.0602816	0.00015378
Synechococcus; Cyanobium PCC-6307 OTU1141722																			0	0.435614	1.08617e-14	3.95787e-08	0.0540232	8.51822e-11	1.5765e-13	0.0602814	1.90423e-08	1.90423e-08	0.0208784
Gammaproteobacteria; SUP05 OTU819670																				0	0.592115	0.142173	0.370286	0.761411	0.0201224	4.42079e-19	0.959065	0.576028	1.61398e-06
Unassigned Bacteria OTU0																					0	7.66512e-10	0.412774	2.50084e-14	9.59997e-13	0.118369	6.96251e-14	8.23908e-10	0.0136826
Alphaproteobacteria; Rhodobacteraceae OTU347569																						0	0.649129	5.3938e-14	3.5531e-10	0.0314978	5.606e-18	1.62737e-08	0.0214615
Gammaproteobacteria;SAR86 OTU275493																							0	0.926105	0.0527743	0.392216	0.926105	0.685988	0.0486443
Gammaproteobacteria;SAR86 OTU230774																								0	1.4073e-09	0.234821	4.38963e-18	4.38147e-12	0.109959
Unassigned Bacteria OTU3																									0	0.000750214	3.47402e-08	2.65184e-10	3.53262e-07
Gammaproteobacteria;SAR86 OTU257395																										0	0.515015	0.266827	5.6582e-08
Alphaproteobacteria; Rhodobacteraceae OTU152417																											0	8.55542e-10	0.174676
Synechococcus; Cyanobium PCC-6307 OTU533688																												0	0.0406906
Cyanobacteria;Oxyphotobacteria OTU833871																													0
Table G. Spearman's Correlation coefficients (ρ) for Y14 bottom samples only.
	Depth (m)	DO (mg/L)	NH4 (μM)	NO2+NO3 (μM)	PO4 (μM)	Salinity (ppt)	Temperature (°C)	Chlorophyll a (μg/L)	qPCR Thaumarchaeota (copy/L)	qPCR amoA (copy/L)	G oligotype (CSS normalized)	A oligotype (CSS normalized)	Thaumarchaeota; N. maritimus OTU4369009	Synechococcus; Cyanobium PCC-6307 OTU404788	Gammaproteobacteria;SAR86 OTU691149	Verrucomicrobia; Chthoniobacteraceae; LD29 OTU3996107	Euryarchaeota; MG II OTU 3134564	Actinobacteria; PeM15 OTU585063	Synechococcus; Cyanobium PCC-6307 OTU1141722	Gammaproteobacteria; SUP05 OTU819670	Unassigned Bacteria OTU0	Alphaproteobacteria; Rhodobacteraceae OTU347569	Gammaproteobacteria;SAR86 OTU275493	Gammaproteobacteria;SAR86 OTU230774	Unassigned Bacteria OTU3	Gammaproteobacteria;SAR86 OTU257395	Alphaproteobacteria; Rhodobacteraceae OTU152417	Synechococcus; Cyanobium PCC-6307 OTU533688	Cyanobacteria;Oxyphotobacteria OTU833871
Depth (m)	1	0.537976	-0.628699	0.0641118	-0.265331	0.885625	-0.8373	-0.59197	-0.306815	-0.288349	-0.104209	0.496698	0.23291	-0.565467	-0.0681922	-0.0777434	-0.258362	-0.556487	-0.106081	0.68658	-0.0503758	-0.0222825	-0.445458	-0.150791	0.213776	0.683603	-0.211732	-0.109924	0.541757
DO (mg/L)		1	-0.180146	-0.588374	-0.591057	0.387721	-0.278797	-0.0649298	-0.620531	-0.591575	-0.637197	-0.108913	-0.343354	-0.659768	0.539474	-0.483885	-0.649923	-0.521562	-0.547317	0.452123	0.480311	0.472003	-0.542355	0.509316	0.598828	0.552007	0.40194	0.38057	0.485125
NH4 (μM)			1	-0.258299	0.0852562	-0.667779	0.625375	0.505212	0.0644696	0.0532613	-0.107986	-0.443329	-0.396349	0.284328	0.174421	-0.113417	-0.0831032	0.312958	-0.0602708	-0.573988	0.14166	0.11841	-0.00893479	0.185805	-0.0335856	-0.550354	0.314015	0.104335	-0.289523
NO2+NO3 (μM)				1	0.815801	0.308521	-0.39878	-0.305864	0.367622	0.367204	0.782588	0.597613	0.663833	0.391222	-0.830464	0.776195	0.6404	0.244568	0.78042	0.0908545	-0.800547	-0.677087	0.329756	-0.815002	-0.679891	-0.0570002	-0.787726	-0.653653	-0.207837
PO4 (μM)					1	0.0512	-0.152715	0.0873943	0.424188	0.442212	0.639372	0.343257	0.45609	0.402605	-0.697422	0.687231	0.552584	0.301929	0.646633	-0.0250847	-0.661285	-0.469641	0.34095	-0.617362	-0.536254	-0.15517	-0.579687	-0.505106	-0.264261
Salinity (ppt)						1	-0.951433	-0.541565	-0.190708	-0.158078	0.113361	0.658333	0.401294	-0.437202	-0.29044	0.187751	-0.0998657	-0.453734	0.1389	0.776466	-0.303357	-0.149172	-0.350976	-0.344132	0.058719	0.694963	-0.405247	-0.235783	0.500883
Temperature (°C)							1	0.474961	0.128426	0.101614	-0.178779	-0.701234	-0.428695	0.463903	0.386426	-0.260185	0.0172439	0.489361	-0.156222	-0.807916	0.323455	0.198136	0.270906	0.408665	-0.0110022	-0.730535	0.459004	0.306019	-0.446814
Chlorophyll a (μg/L)								1	0.0403179	0.0507241	-0.332749	-0.52095	-0.417941	-0.065743	0.369823	-0.267863	-0.247797	-0.0680481	-0.397154	-0.180469	0.433357	0.430283	0.196509	0.49665	0.370104	-0.119721	0.483684	0.505823	-0.0497287
qPCR Thaumarchaeota (copy/L)									1	0.985085	0.571758	0.264269	0.454246	0.375969	-0.346051	0.330259	0.593512	0.261531	0.37888	-0.232718	-0.323097	-0.233342	0.260331	-0.361323	-0.42467	-0.320503	-0.282469	-0.345475	-0.328651
qPCR amoA (copy/L)										1	0.553362	0.269549	0.454851	0.345101	-0.348943	0.322964	0.580403	0.225744	0.366006	-0.202882	-0.319597	-0.227329	0.232565	-0.34976	-0.415566	-0.288905	-0.289914	-0.354227	-0.311103
G oligotype (CSS normalized)											1	0.607971	0.789868	0.594814	-0.727539	0.808069	0.740312	0.510396	0.86325	-0.135846	-0.828091	-0.678175	0.359712	-0.77988	-0.826177	-0.277983	-0.737719	-0.763073	-0.433192
A oligotype (CSS normalized)												1	0.804946	-0.0254982	-0.567635	0.583622	0.394382	-0.0819688	0.531183	0.512317	-0.499928	-0.366531	0.0117647	-0.62958	-0.326273	0.407539	-0.54401	-0.574838	0.244856
Thaumarchaeota; N. maritimus OTU4369009													1	0.244274	-0.566387	0.713929	0.560144	0.215846	0.693899	0.296999	-0.595774	-0.432317	0.268091	-0.602113	-0.498607	0.152845	-0.561969	-0.513277	-0.002353
Synechococcus; Cyanobium PCC-6307 OTU404788														1	-0.324178	0.468396	0.590204	0.82617	0.659567	-0.622569	-0.509724	-0.438848	0.397071	-0.392173	-0.723919	-0.743577	-0.298439	-0.344538	-0.722226
Gammaproteobacteria;SAR86 OTU691149															1	-0.70293	-0.610276	-0.19443	-0.733231	0.00206483	0.802545	0.79419	0.0118607	0.922401	0.659606	0.132293	0.87419	0.752413	0.171049
Verrucomicrobia; Chthoniobacteraceae; LD29 OTU3996107																1	0.55562	0.478002	0.908619	0.0704611	-0.789097	-0.605235	0.362488	-0.721566	-0.69743	-0.0959654	-0.672671	-0.66489	-0.203751
Euryarchaeota; MG II OTU 3134564																	1	0.363169	0.629082	-0.227467	-0.557167	-0.45988	0.369508	-0.600288	-0.680115	-0.367395	-0.49503	-0.579544	-0.518668
Actinobacteria; PeM15 OTU585063																		1	0.592634	-0.532293	-0.432797	-0.253974	0.403697	-0.233998	-0.576321	-0.651092	-0.142953	-0.289508	-0.538644
Synechococcus; Cyanobium PCC-6307 OTU1141722																			1	-0.127759	-0.869309	-0.713517	0.29663	-0.79324	-0.849991	-0.289994	-0.724961	-0.725153	-0.352367
Gammaproteobacteria; SUP05 OTU819670																				1	0.0894598	0.229484	-0.14593	0.0494118	0.354467	0.919424	-0.00830732	0.0933013	0.648275
Unassigned Bacteria OTU0																					1	0.767491	-0.133926	0.863529	0.836311	0.243313	0.855846	0.766435	0.374271
Alphaproteobacteria; Rhodobacteraceae OTU347569																						1	-0.0763986	0.857959	0.776033	0.32946	0.907803	0.727731	0.350693
Gammaproteobacteria;SAR86 OTU275493																							1	-0.0167587	-0.298319	-0.139688	-0.0163745	-0.0687155	-0.303537
Gammaproteobacteria;SAR86 OTU230774																								1	0.759654	0.189052	0.910108	0.822521	0.249178
Unassigned Bacteria OTU3																									1	0.489721	0.715802	0.779971	0.67713
Gammaproteobacteria;SAR86 OTU257395																										1	0.107995	0.177239	0.708204
Alphaproteobacteria; Rhodobacteraceae OTU152417																											1	0.765762	0.213595
Synechococcus; Cyanobium PCC-6307 OTU533688																												1	0.314629
Cyanobacteria;Oxyphotobacteria OTU833871																													1

## Sheet: Table H
Table H. Envfit B-H corrected p-values for NMDS ordinations.
2014 All samples	NMDS1	NMDS2	r2	envfit pvalue	p.adjust B-H correction
Depth (m)	0.30768	-0.95149	0.7592	0.001	0.00109091
Dissolved Oxygen (DO) (mg/L)	-0.52921	0.84849	0.4871	0.001	0.00109091
NH4 (μM)	0.12644	-0.99197	0.0177	0.419	0.419
NO2+NO3 (μM)	-0.93678	-0.34993	0.3317	0.001	0.00109091
PO4 (μM)	-0.69117	-0.72269	0.3304	0.001	0.00109091
Salinity (ppt)	0.76513	-0.64388	0.8436	0.001	0.00109091
Temperature (°C)	-0.21613	0.97636	0.7991	0.001	0.00109091
Chlorophyll a (μg/L)	-0.8923	0.45143	0.4679	0.001	0.00109091
qPCR Thaumarchaeota (copy/L)	-0.18794	-0.98218	0.2641	0.001	0.00109091
qPCR amoA (copy/L)	-0.16653	-0.98604	0.2686	0.001	0.00109091
G oligotype (CSS normalized)	-0.33911	-0.94074	0.2695	0.001	0.00109091
A oligotype (CSS normalized)	0.02537	-0.99968	0.5633	0.001	0.00109091
2014 Bottom only samples	NMDS1	NMDS2	r2	envfit pvalue	p.adjust B-H correction
Depth (m)	-0.18672	-0.98241	0.7988	0.001	0.00133333
Dissolved Oxygen (DO) (mg/L)	0.45361	-0.8912	0.5299	0.001	0.00133333
NH4 (μM)	0.11134	0.99378	0.2319	0.002	0.002
NO2+NO3 (μM)	-0.99882	0.04848	0.7036	0.001	0.00133333
PO4 (μM)	-0.66624	0.74574	0.5107	0.001	0.00133333
Salinity (ppt)	-0.22389	-0.97461	0.6459	0.001	0.00133333
Temperature (°C)	0.37984	0.92505	0.8547	0.001	0.00133333
Chlorophyll a (μg/L)	0.34177	0.93978	0.2271	0.002	0.002
qPCR Thaumarchaeota (copy/L)	-0.62135	0.78353	0.3196	0.001	0.00133333
qPCR amoA (copy/L)	-0.63465	0.7728	0.2916	0.002	0.002
G oligotype (CSS normalized)	-0.87864	0.47749	0.4286	0.001	0.00133333
A oligotype (CSS normalized)	-0.71721	-0.69686	0.5482	0.001	0.00133333
Y13 Y14 same samples	NMDS1	NMDS2	r2	envfit pvalue	p.adjust B-H correction
Depth (m)	0.38357	0.92351	0.2004	0.002	0.00236364
Dissolved Oxygen (DO) (mg/L)	0.94895	-0.31541	0.1847	0.003	0.00325
NH4 (μM)	-0.58382	-0.81188	0.3201	0.001	0.0013
NO2+NO3 (μM)	-0.47225	0.88146	0.3428	0.001	0.0013
PO4 (μM)	-0.40379	0.91485	0.2902	0.001	0.0013
Salinity (ppt)	0.24593	0.96929	0.3969	0.001	0.0013
Temperature (°C)	-0.20247	-0.97929	0.5117	0.001	0.0013
Chlorophyll a (μg/L)	0.30468	-0.95245	0.1116	0.026	0.026
qPCR Thaumarchaeota (copy/L)	-0.24451	0.96965	0.3112	0.001	0.0013
qPCR amoA (copy/L)	-0.19218	0.98136	0.2487	0.001	0.0013
G oligotype (CSS normalized)	-0.99837	-0.05715	0.4594	0.001	0.0013
A oligotype (CSS normalized)	-0.32444	0.9459	0.2032	0.001	0.0013

## Sheet: Tables I-J
Table I. P-values (B-H corrected) for Spearman's correlation coefficients for Y13 same samples only.
	Depth (m)	DO (mg/L)	NH4 (μM)	NO2+NO3 (μM)	PO4 (μM)	Salinity (ppt)	Temperature (°C)	Chlorophyll a (μg/L)	qPCR Thaumarchaeota (copy/L)	qPCR amoA (copy/L)	G oligotype (CSS normalized)	A oligotype (CSS normalized)	Thaumarchaeota; N. maritimus OTU4369009	Alphaproteobacteria; AEGEAN-169 OTU3156804	Actinobacteria; Ca. Actinomarina OTU639502	Gammaproteobacteria; SUP05 OTU819670	Unassigned Bacteria OTU0	Gammaproteobacteria; HOC36 OTU60638	Thaumarchaeota; Ca. Nitrosopelagicus OTU1584736	Euryarchaeota; MG II OTU104364	Gammaproteobacteria; UBA10353 OTU266046	Alphaproteobacteria; AEGEAN-169 OTU592269	Euryarchaeota; MG II OTU 3134564	Deltaproteobacteria; SAR324 OTU837775	Actinobacteria; PeM15 OTU585063	Alphaproteobacteria; AEGEAN-169 OTU3624	Actinobacteria; Ca. Actinomarina OTU1104793	Synechococcus; CC9902 OTU427495	Thaumarchaeota; Ca. Nitrosopelagicus OTU4073697
Depth (m)	0	0.777612	0.363492	0.331781	0.582552	0.000204762	0.000133172	0.0675467	0.769266	0.769266	0.567699	0.0857053	0.757954	0.00350568	0.915115	4.92546e-05	0.581332	0.000888257	4.92546e-05	0.099291	0.822179	0.263335	0.200357	0.56374	0.0114076	0.794494	0.645654	0.722593	0.000888257
DO (mg/L)		0	0.767242	0.582552	9.65811e-05	0.181878	0.00350568	0.748201	0.00593272	0.00854942	7.89002e-05	0.822391	0.000133172	0.343635	0.89751	0.579599	0.924236	0.89751	0.713987	0.524792	0.00147541	0.0536715	0.0216159	0.276658	0.748201	3.21499e-08	0.134526	0.69209	0.682076
NH4 (μM)			0	0.075744	0.917995	0.717283	0.380243	0.0229944	0.715541	0.980981	0.709287	0.0559503	0.28823	0.303248	0.807285	0.0491922	0.542523	0.132374	0.0664101	0.689504	0.974767	0.812048	0.0858696	0.306552	0.915115	0.764977	0.930381	0.28823	0.118251
NO2+NO3 (μM)				0	0.037154	0.178271	0.303248	0.000189116	0.047064	0.0795527	0.0567401	0.00105141	0.0210388	0.188928	0.6593	0.220394	0.142074	0.0857053	0.00488638	0.77619	0.380243	0.709287	0.000888257	0.728166	0.9362	0.748201	0.988879	0.769266	0.000133172
PO4 (μM)					0	0.767242	0.303248	0.56374	0.00180762	0.00718786	3.64059e-07	0.988879	5.44101e-06	0.408418	0.391428	0.74269	0.113803	0.371769	0.682076	0.075744	0.0168802	0.166172	0.0764681	0.128737	0.380243	0.000134835	0.717283	0.915115	0.418446
Salinity (ppt)						0	7.81633e-08	0.0795527	0.972303	0.926183	0.808604	0.0750229	0.582552	0.0252416	0.757954	1.11635e-05	0.924236	7.89002e-05	8.33092e-06	0.719588	0.59742	0.00079963	0.0508552	0.643796	0.000845673	0.565644	0.522041	0.645654	4.92546e-05
Temperature (°C)							0	0.19561	0.271404	0.29417	0.331781	0.434755	0.0900759	0.317893	0.658887	0.000128587	0.528432	0.00488638	0.000128587	0.812048	0.191147	0.000676587	0.036927	0.391428	0.0652488	0.0767502	0.4351	0.645654	0.00113672
Chlorophyll a (μg/L)								0	0.682752	0.794494	0.785817	0.00408089	0.434755	0.00318459	0.832976	0.0165115	0.579599	0.013204	3.02894e-05	0.69209	0.715541	0.556977	0.03226	0.770684	0.230744	0.682076	0.717283	0.915115	1.64672e-06
qPCR Thaumarchaeota (copy/L)									0	5.118e-11	0.000814553	0.645654	8.47354e-06	0.97703	0.314143	0.822179	0.924236	0.950266	0.6374	0.709287	0.0132059	0.903609	0.0462987	0.0613001	0.0622113	0.0130413	0.141584	0.764977	0.391678
qPCR amoA (copy/L)										0	0.00718786	0.592682	0.000267824	0.926183	0.229682	0.861175	0.769266	0.94197	0.777612	0.486113	0.00952992	0.958424	0.075744	0.0165115	0.118409	0.0235599	0.137046	0.972303	0.594707
G oligotype (CSS normalized)											0	0.792229	5.13943e-09	0.391678	0.886647	0.817142	0.178271	0.652895	0.915115	0.141584	0.00511368	0.13596	0.0191124	0.191147	0.325922	1.11221e-07	0.401133	0.627716	0.623035
A oligotype (CSS normalized)												0	0.389227	0.00180762	0.889378	0.0205735	0.220394	0.0553682	0.00350568	0.0553682	0.972303	0.822179	0.0514269	0.915115	0.172583	0.650558	0.752077	0.0130413	0.00144044
Thaumarchaeota; N. maritimus OTU4369009													0	0.972303	0.915115	0.65524	0.247284	0.974767	0.314098	0.812048	0.00149969	0.259535	0.00183979	0.0622113	0.331781	2.58882e-05	0.11245	0.682076	0.137046
Alphaproteobacteria; AEGEAN-169 OTU3156804														0	0.389227	0.000134835	0.89751	0.000112113	0.000642141	0.000845673	0.916986	0.972303	0.124107	0.389058	0.105143	0.331781	0.0462987	0.808604	0.00132562
Actinobacteria; Ca. Actinomarina OTU639502															0	0.590564	0.122126	0.13596	0.56374	0.00352019	0.0940794	0.0435184	0.211244	0.54291	0.0580996	0.926183	0.00398427	0.817142	0.682076
Gammaproteobacteria; SUP05 OTU819670																0	0.361485	3.2765e-06	1.11635e-05	0.0295834	0.535664	0.111411	0.00314199	0.94197	0.0451693	0.909828	0.0936919	0.200357	0.000133172
Unassigned Bacteria OTU0																	0	0.147001	0.769266	0.419721	0.743282	0.915115	0.643796	0.653558	0.974767	0.812048	0.915115	0.69209	0.391428
Gammaproteobacteria; HOC36 OTU60638																		0	0.00048268	0.0180202	0.810629	0.188928	0.037154	0.718461	0.0533203	0.816658	0.26143	0.667031	0.00112017
Thaumarchaeota; Ca. Nitrosopelagicus OTU1584736																			0	0.389227	0.861175	0.0276806	0.013204	0.550695	0.013204	0.917995	0.812048	0.748201	3.33854e-14
Euryarchaeota; MG II OTU104364																				0	0.303248	0.174026	0.178413	0.570539	0.921447	0.331781	0.00413929	0.642444	0.581332
Gammaproteobacteria; UBA10353 OTU266046																					0	0.916986	0.00181248	0.0483624	0.0587118	0.00485599	0.000171216	0.802648	0.915115
Alphaproteobacteria; AEGEAN-169 OTU592269																						0	0.410347	0.708518	0.00718786	0.0347521	0.812048	0.582552	0.0433544
Euryarchaeota; MG II OTU 3134564																							0	0.861175	0.960144	0.0608195	0.0567401	0.652895	0.00350568
Deltaproteobacteria; SAR324 OTU837775																								0	0.582552	0.144667	0.0493885	0.104155	0.526796
Actinobacteria; PeM15 OTU585063																									0	0.748201	0.3166	0.665856	0.0303497
Alphaproteobacteria; AEGEAN-169 OTU3624																										0	0.143394	0.764977	0.926183
Actinobacteria; Ca. Actinomarina OTU1104793																											0	0.915115	0.886647
Synechococcus; CC9902 OTU427495																												0	0.748201
Thaumarchaeota; Ca. Nitrosopelagicus OTU4073697																													0
Table J. Spearman's Correlation coefficients (ρ) for Y13 same samples only.
	Depth (m)	DO (mg/L)	NH4 (μM)	NO2+NO3 (μM)	PO4 (μM)	Salinity (ppt)	Temperature (°C)	Chlorophyll a (μg/L)	qPCR Thaumarchaeota (copy/L)	qPCR amoA (copy/L)	G oligotype (CSS normalized)	A oligotype (CSS normalized)	Thaumarchaeota; N. maritimus OTU4369009	Alphaproteobacteria; AEGEAN-169 OTU3156804	Actinobacteria; Ca. Actinomarina OTU639502	Gammaproteobacteria; SUP05 OTU819670	Unassigned Bacteria OTU0	Gammaproteobacteria; HOC36 OTU60638	Thaumarchaeota; Ca. Nitrosopelagicus OTU1584736	Euryarchaeota; MG II OTU104364	Gammaproteobacteria; UBA10353 OTU266046	Alphaproteobacteria; AEGEAN-169 OTU592269	Euryarchaeota; MG II OTU 3134564	Deltaproteobacteria; SAR324 OTU837775	Actinobacteria; PeM15 OTU585063	Alphaproteobacteria; AEGEAN-169 OTU3624	Actinobacteria; Ca. Actinomarina OTU1104793	Synechococcus; CC9902 OTU427495	Thaumarchaeota; Ca. Nitrosopelagicus OTU4073697
Depth (m)	1	-0.0879846	-0.237903	0.24819	-0.164803	0.682064	-0.698139	-0.405059	0.0931427	0.0922852	-0.171921	0.38563	0.0989736	0.577713	0.0359238	0.730572	0.166553	0.634164	0.728439	0.373534	0.0685484	-0.278592	0.305718	0.173754	-0.522361	-0.082478	0.144062	-0.11217	0.633798
DO (mg/L)		1	-0.0945834	-0.164986	-0.710423	-0.31659	0.577833	-0.102649	-0.552673	-0.535688	-0.715975	0.0676382	-0.696545	0.244341	0.0465585	-0.167904	0.0301547	0.047475	-0.117874	0.187151	-0.614059	0.425442	-0.485565	-0.273302	-0.102465	-0.85895	-0.346989	0.124828	-0.130144
NH4 (μM)			1	-0.396114	0.0333639	-0.11493	0.231552	0.482038	-0.116612	-0.00550408	-0.120235	-0.421554	-0.268695	-0.262097	-0.0788123	-0.432918	-0.181294	-0.348607	-0.406562	-0.126833	0.00879765	0.0751466	-0.384897	0.260264	-0.0392229	0.0964076	0.0256598	0.268695	-0.358871
NO2+NO3 (μM)				1	0.452379	0.319065	-0.262835	-0.684813	0.436417	0.39156	0.41976	0.62799	0.487398	0.313079	0.137476	0.296948	-0.339838	0.385483	0.56132	0.0892677	0.231693	-0.119329	0.634222	0.110531	-0.0238292	0.103015	-0.00256622	-0.0922005	0.696911
PO4 (μM)					1	0.0946008	-0.262217	-0.173969	0.605538	0.543353	0.825115	-0.00274977	0.780935	-0.219065	-0.225481	-0.107058	-0.361985	-0.235197	0.129343	-0.396517	0.499908	-0.326306	0.39505	0.351054	0.231531	0.695325	0.115307	0.036297	0.215582
Salinity (ppt)						1	-0.847268	-0.391165	0.0106354	0.0277064	0.0775364	0.39813	0.164055	0.4764	-0.0989827	0.764183	0.0306333	0.715975	0.772227	0.11328	0.158739	-0.641188	0.430025	0.146091	-0.637338	0.172853	0.18825	-0.144625	0.728256
Temperature (°C)							1	0.308553	-0.27547	-0.266379	-0.249152	-0.210102	-0.381337	-0.255019	0.138051	-0.700889	-0.185366	-0.561371	-0.701503	-0.0746173	-0.310936	0.646805	-0.453754	-0.225869	0.408103	-0.394353	-0.209552	0.143735	-0.624255
Chlorophyll a (μg/L)								1	-0.128713	-0.0825613	-0.0857771	-0.570381	-0.210411	-0.583578	0.0648827	-0.501466	0.168276	-0.513196	-0.741637	-0.125733	0.116569	0.176686	-0.461877	-0.0909091	0.291789	0.130865	0.114736	0.0388563	-0.802786
qPCR Thaumarchaeota (copy/L)									1	0.914564	0.639897	0.144481	0.770444	0.00696736	0.257059	0.0685735	-0.0296842	-0.0190686	0.148895	0.119545	0.512651	-0.0447378	0.437844	0.413275	0.411441	0.515952	0.340667	-0.096443	0.224789
qPCR amoA (copy/L)										1	0.54362	0.160719	0.674434	0.027337	0.292634	0.0576094	-0.0916969	-0.0214659	0.0880734	0.196863	0.530594	0.0166957	0.396661	0.501973	0.358316	0.480323	0.343822	-0.0111916	0.159802
G oligotype (CSS normalized)											1	0.0839443	0.878666	-0.22434	-0.0509531	-0.0711144	-0.319323	-0.141129	0.0384933	-0.340543	0.559018	-0.345308	0.493035	0.31085	0.252199	0.841276	0.221408	-0.151393	0.152859
A oligotype (CSS normalized)												1	0.227639	0.605572	0.0498534	0.489003	-0.296542	0.422654	0.579232	0.423021	-0.0117302	-0.0681818	0.428886	-0.0388563	-0.322947	-0.142229	0.101173	-0.515396	0.615469
Thaumarchaeota; N. maritimus OTU4369009													1	0.0102639	0.0377566	0.139296	-0.285438	-0.00806452	0.257538	-0.0736804	0.612903	-0.280792	0.603739	0.411657	0.248534	0.745968	0.36327	-0.129765	0.344208
Alphaproteobacteria; AEGEAN-169 OTU3156804														1	0.228006	0.694648	-0.046903	0.706012	0.64907	0.637463	0.0344575	-0.0102639	0.354106	0.228739	-0.368768	-0.2489	0.43805	-0.0777126	0.618768
Actinobacteria; Ca. Actinomarina OTU639502															1	0.161657	0.355697	0.345674	-0.174136	0.576979	0.377566	0.442815	0.300953	0.180718	0.417889	-0.0271261	0.571848	0.0707478	-0.130499
Gammaproteobacteria; SUP05 OTU819670																1	0.238918	0.790689	0.7629	0.467375	0.183284	-0.36437	0.584677	0.0219941	-0.440249	0.0428886	0.378299	-0.306085	0.696848
Unassigned Bacteria OTU0																	1	0.335979	-0.0920914	0.214797	-0.106441	-0.038671	-0.146261	-0.140135	0.00804051	-0.0746619	0.0367566	-0.125011	-0.225326
Gammaproteobacteria; HOC36 OTU60638																		1	0.657868	0.496334	0.0766129	-0.312683	0.452713	0.114003	-0.42632	-0.0718475	0.279692	-0.134897	0.625367
Thaumarchaeota; Ca. Nitrosopelagicus OTU1584736																			1	0.227294	0.0573733	-0.471268	0.51416	0.178535	-0.51361	-0.0331775	0.0733205	-0.103382	0.950784
Euryarchaeota; MG II OTU104364																				1	0.26173	0.321848	0.318548	0.170821	0.0318915	-0.25	0.569282	-0.147361	0.166789
Gammaproteobacteria; UBA10353 OTU266046																					1	-0.034824	0.604839	0.434384	0.416789	0.562683	0.68805	0.0802786	0.03739
Alphaproteobacteria; AEGEAN-169 OTU592269																						1	-0.218109	-0.120968	0.543988	-0.457478	0.0736804	0.163856	-0.443548
Euryarchaeota; MG II OTU 3134564																							1	0.0579179	0.0157625	0.414223	0.420088	-0.140762	0.578812
Deltaproteobacteria; SAR324 OTU837775																								1	0.164223	0.33761	0.432185	0.369868	0.186217
Actinobacteria; PeM15 OTU585063																									1	0.103739	0.255865	0.13563	-0.465543
Alphaproteobacteria; AEGEAN-169 OTU3624																										1	0.33871	-0.0960411	0.0274927
Actinobacteria; Ca. Actinomarina OTU1104793																											1	-0.0384897	0.0513196
Synechococcus; CC9902 OTU427495																												1	-0.102639
Thaumarchaeota; Ca. Nitrosopelagicus OTU4073697																													1

## Sheet: Tables K-L
Table K. P-values (B-H corrected) for Spearman's correlation coefficients for Y14 same samples only.
	Depth (m)	DO (mg/L)	NH4 (μM)	NO2+NO3 (μM)	PO4 (μM)	Salinity (ppt)	Temperature (°C)	Chlorophyll a (μg/L)	qPCR Thaumarchaeota (copy/L)	qPCR amoA (copy/L)	G oligotype (CSS normalized)	A oligotype (CSS normalized)	Thaumarchaeota; N. maritimus OTU4369009	Alphaproteobacteria; AEGEAN-169 OTU3156804	Actinobacteria; Ca. Actinomarina OTU639502	Gammaproteobacteria; SUP05 OTU819670	Unassigned Bacteria OTU0	Gammaproteobacteria; HOC36 OTU60638	Thaumarchaeota; Ca. Nitrosopelagicus OTU1584736	Euryarchaeota; MG II OTU104364	Gammaproteobacteria; UBA10353 OTU266046	Alphaproteobacteria; AEGEAN-169 OTU592269	Euryarchaeota; MG II OTU 3134564	Deltaproteobacteria; SAR324 OTU837775	Actinobacteria; PeM15 OTU585063	Alphaproteobacteria; AEGEAN-169 OTU3624	Actinobacteria; Ca. Actinomarina OTU1104793	Synechococcus; CC9902 OTU427495	Thaumarchaeota; Ca. Nitrosopelagicus OTU4073697
Depth (m)	0	0.00126621	0.0248362	0.630894	0.097732	1.78792e-08	2.86453e-08	0.0800374	0.270072	0.174588	0.874631	0.0168813	0.713615	0.395494	0.0945891	0.00547151	0.759666	0.0222901	0.0465628	0.0168813	0.99285	0.0706033	0.0412034	0.950387	0.0119516	0.107886	0.0820972	7.70931e-06	0.0236122
DO (mg/L)		0	0.468086	0.000494672	0.00145845	0.0279184	0.0158648	0.304664	0.0255657	0.0465628	0.00666296	0.874631	0.0644574	0.00332982	0.458839	0.000494672	0.00247095	0.0266012	0.812544	0.12462	0.113016	0.339153	0.000302744	0.230552	0.00190987	0.0289326	0.49455	0.0794027	0.759666
NH4 (μM)			0	0.553471	0.658298	0.0175366	0.0298706	0.270072	0.885767	0.940368	0.645444	0.310636	0.34563	0.541805	0.195705	0.0849554	0.967416	0.0399361	0.0176503	0.068859	0.759666	0.103819	0.921226	0.960154	0.10662	0.395494	0.138145	0.104908	0.0115959
NO2+NO3 (μM)				0	1.93965e-08	0.367228	0.542354	0.132338	0.0119516	0.0675063	3.26757e-07	0.00266015	3.12695e-05	0.0168813	0.00813372	0.166085	2.61172e-07	0.917929	0.00139849	0.90699	0.00139925	7.84836e-05	0.000506202	0.0273446	0.0289326	0.0215494	0.967416	0.551135	0.000876193
PO4 (μM)					0	0.945945	0.880464	0.925364	0.0108312	0.0575289	7.84836e-05	0.0448274	0.00131378	0.113016	0.0706033	0.230552	7.84836e-05	0.821617	0.0302371	0.633997	0.00050588	0.00813372	0.000798578	0.100893	0.0195736	0.00941289	0.675885	0.960112	0.0448274
Salinity (ppt)						0	1.952e-16	0.175237	0.757033	0.634292	0.230552	6.44897e-05	0.085685	0.542354	0.0219666	0.000777879	0.481343	0.00139849	0.000740214	0.0119516	0.310636	0.00139925	0.370342	0.450851	0.0481888	0.448186	0.068859	2.55394e-06	0.000143673
Temperature (°C)							0	0.284236	0.467657	0.435489	0.448186	0.000543815	0.243741	0.460688	0.0248362	0.000398784	0.701324	0.00386044	0.00101411	0.0692934	0.634292	0.0070288	0.300054	0.878868	0.0167988	0.190314	0.0222901	8.55013e-06	0.000312973
Chlorophyll a (μg/L)								0	0.128238	0.321717	0.013436	0.0337219	0.100412	0.0706033	0.0266012	0.165312	0.0058934	0.45714	0.08759	0.306992	0.243741	0.0143446	0.166494	0.175274	0.110626	0.610421	0.917929	0.0108312	0.0203062
qPCR Thaumarchaeota (copy/L)									0	2.03261e-10	0.000194708	0.102541	0.000413614	0.105838	0.0414833	0.0688219	0.00309184	0.310636	0.177942	0.783537	0.129556	0.150652	0.000398784	0.220343	0.0108312	0.00329336	0.869921	0.563386	0.237305
qPCR amoA (copy/L)										0	0.00139849	0.18097	0.000453989	0.366813	0.195541	0.17233	0.0460327	0.458839	0.354163	0.610421	0.512555	0.506947	0.0002433	0.237305	0.0808542	0.00451654	0.954483	0.781593	0.362173
G oligotype (CSS normalized)											0	9.52125e-05	8.26667e-10	0.0244543	0.0128365	0.187589	8.97226e-09	0.892018	0.00151686	0.385434	0.000213027	0.000274906	8.71526e-05	0.000974082	0.00373634	0.00151452	0.542109	0.118185	0.000494672
A oligotype (CSS normalized)												0	3.9468e-06	0.515513	0.0167988	0.295019	0.0110588	0.0393832	7.70931e-06	0.0129369	0.00470166	0.000195986	0.184373	0.00373634	0.672791	0.541805	0.6034	0.000416109	1.22006e-06
Thaumarchaeota; N. maritimus OTU4369009													0	0.274043	0.038609	0.757033	0.000394803	0.353893	0.00142957	0.093625	0.000740214	0.00192365	0.00133332	0.000180684	0.112367	0.00386044	0.703588	0.0506068	0.00129888
Alphaproteobacteria; AEGEAN-169 OTU3156804														0	0.00360978	0.00275361	0.000290799	0.000383592	0.950387	0.0394035	0.214595	0.0189437	0.108996	0.353893	0.0166375	0.237305	0.534276	0.968251	0.669303
Actinobacteria; Ca. Actinomarina OTU639502															0	0.642874	0.00354615	0.448186	0.0189437	0.777639	0.366813	0.000290799	0.239452	0.99285	0.953672	0.541805	0.00192365	0.0128365	0.00713296
Gammaproteobacteria; SUP05 OTU819670																0	0.0189437	0.000213027	0.464995	0.139992	0.868084	0.928148	0.00874548	0.542109	0.00373634	0.132731	0.136631	0.0841652	0.504213
Unassigned Bacteria OTU0																	0	0.306992	0.0203062	0.975442	0.00133332	3.13116e-05	0.00332982	0.0115959	0.00183843	0.0083208	0.423558	0.205039	0.00777067
Gammaproteobacteria; HOC36 OTU60638																		0	0.0266012	7.64465e-05	0.624252	0.761771	0.411932	0.581234	0.0277508	0.870436	0.928148	0.103819	0.0288847
Thaumarchaeota; Ca. Nitrosopelagicus OTU1584736																			0	0.0176503	0.257836	0.00144077	0.113016	0.329347	0.83956	0.377377	0.254379	0.00692352	1.952e-16
Euryarchaeota; MG II OTU104364																				0	0.981006	0.645444	0.781593	0.237305	0.34563	0.751128	0.541805	0.0393832	0.00947745
Gammaproteobacteria; UBA10353 OTU266046																					0	0.00338402	0.0706033	0.000173651	0.00338402	0.0308857	0.0639228	0.296102	0.213858
Alphaproteobacteria; AEGEAN-169 OTU592269																						0	0.13865	0.0101322	0.395494	0.271862	0.600568	0.00543459	0.000167716
Euryarchaeota; MG II OTU 3134564																							0	0.165312	0.0139774	0.00231218	0.634292	0.600568	0.106306
Deltaproteobacteria; SAR324 OTU837775																								0	0.0120572	0.0405804	0.0070411	0.245262	0.219247
Actinobacteria; PeM15 OTU585063																									0	0.00557161	0.00846169	0.243741	0.888519
Alphaproteobacteria; AEGEAN-169 OTU3624																										0	0.15744	0.41849	0.442514
Actinobacteria; Ca. Actinomarina OTU1104793																											0	0.411932	0.22472
Synechococcus; CC9902 OTU427495																												0	0.00232818
Thaumarchaeota; Ca. Nitrosopelagicus OTU4073697																													0
Table L. Spearman's Correlation coefficients (ρ) for Y14 same samples only.
	Depth (m)	DO (mg/L)	NH4 (μM)	NO2+NO3 (μM)	PO4 (μM)	Salinity (ppt)	Temperature (°C)	Chlorophyll a (μg/L)	qPCR Thaumarchaeota (copy/L)	qPCR amoA (copy/L)	G oligotype (CSS normalized)	A oligotype (CSS normalized)	Thaumarchaeota; N. maritimus OTU4369009	Alphaproteobacteria; AEGEAN-169 OTU3156804	Actinobacteria; Ca. Actinomarina OTU639502	Gammaproteobacteria; SUP05 OTU819670	Unassigned Bacteria OTU0	Gammaproteobacteria; HOC36 OTU60638	Thaumarchaeota; Ca. Nitrosopelagicus OTU1584736	Euryarchaeota; MG II OTU104364	Gammaproteobacteria; UBA10353 OTU266046	Alphaproteobacteria; AEGEAN-169 OTU592269	Euryarchaeota; MG II OTU 3134564	Deltaproteobacteria; SAR324 OTU837775	Actinobacteria; PeM15 OTU585063	Alphaproteobacteria; AEGEAN-169 OTU3624	Actinobacteria; Ca. Actinomarina OTU1104793	Synechococcus; CC9902 OTU427495	Thaumarchaeota; Ca. Nitrosopelagicus OTU4073697
Depth (m)	1	0.613749	-0.451202	-0.113107	-0.349271	0.860762	-0.853003	-0.366269	-0.242346	-0.292656	-0.0430758	0.477133	0.0878013	0.191183	-0.351938	0.542205	0.0755201	0.45862	0.406416	0.477133	-0.00164971	-0.376134	-0.415727	0.0175969	-0.498579	-0.338702	-0.363853	-0.768216	0.454911
DO (mg/L)		1	-0.164282	-0.649496	-0.603102	0.442517	-0.482164	0.227681	-0.449313	-0.406711	-0.532857	-0.0427092	-0.384383	0.567317	0.168637	0.648886	0.580698	0.446155	-0.059945	0.325176	-0.333242	0.213546	-0.66905	-0.261937	-0.592063	-0.439616	-0.156539	-0.367152	-0.0746209
NH4 (μM)			1	-0.135571	0.103223	-0.474704	0.43746	0.242249	0.0387085	0.0212864	-0.10676	-0.223975	-0.210951	-0.141246	0.27974	-0.360818	0.0102724	-0.418234	-0.473675	-0.378795	0.0746584	0.343208	0.0276988	-0.0130239	0.339907	-0.19095	0.315143	0.342108	-0.501157
NO2+NO3 (μM)				1	0.858402	0.201555	-0.139202	-0.319523	0.498808	0.38104	0.821923	0.577582	0.739804	-0.47695	-0.521675	-0.297865	-0.826139	-0.0293282	0.607333	0.0324443	0.606177	-0.715791	0.646687	0.444322	0.439556	0.461075	-0.0106315	-0.136559	0.627
PO4 (μM)					1	0.0194958	0.0403966	-0.0262458	0.506103	0.392326	0.714444	0.4098	0.611489	-0.333823	-0.375482	-0.261883	-0.714077	-0.0574418	0.436451	-0.111947	0.647275	-0.521564	0.630391	0.346302	0.467059	0.513594	0.0978162	0.0135805	0.409706
Salinity (ppt)						1	-0.964473	-0.291996	-0.0769675	-0.11059	0.262071	0.722542	0.359887	0.139156	-0.459732	0.63174	-0.16038	0.607747	0.634197	0.499043	0.223868	-0.605902	-0.200245	0.171638	-0.403996	-0.172847	-0.378712	-0.79009	0.697339
Temperature (°C)							1	0.23613	0.164787	0.177766	-0.172749	-0.644049	-0.254355	-0.167431	0.451311	-0.658353	0.0915093	-0.557675	-0.621366	-0.377957	-0.110765	0.5298	0.229598	-0.0412617	0.478269	0.282864	0.45828	0.765267	-0.667473
Chlorophyll a (μg/L)								1	-0.32264	-0.219859	-0.491247	-0.429658	-0.346989	0.375951	0.446339	0.298598	0.538356	0.169554	-0.35802	-0.226377	-0.253872	0.487398	-0.297315	-0.291632	-0.336175	-0.118894	-0.0289616	0.505545	-0.464677
qPCR Thaumarchaeota (copy/L)									1	0.903273	0.686463	0.34479	0.656585	-0.341124	-0.414994	-0.379434	-0.571167	-0.224361	0.290009	0.066905	0.32151	-0.307213	0.658235	0.267437	0.505362	0.568369	0.0452754	-0.13271	0.258133
qPCR amoA (copy/L)										1	0.606894	0.288229	0.652732	-0.202054	-0.280161	-0.294096	-0.407774	-0.168317	0.207023	0.118812	0.150715	-0.152549	0.677668	0.257792	0.365237	0.551122	0.0154015	-0.0678401	0.204204
G oligotype (CSS normalized)											1	0.707845	0.891129	-0.452713	-0.494501	-0.284457	-0.869135	0.0362903	0.600862	0.195015	0.681818	-0.673754	0.710777	0.623167	0.560484	0.601372	0.140029	-0.329545	0.648498
A oligotype (CSS normalized)												1	0.781891	-0.14956	-0.478372	0.232038	-0.504032	0.419721	0.769132	0.493402	0.54912	-0.685484	0.28629	0.559751	0.0989736	0.140919	-0.121334	-0.655792	0.802516
Thaumarchaeota; N. maritimus OTU4369009													1	-0.240103	-0.421554	-0.0766129	-0.659824	0.207845	0.604711	0.353006	0.633798	-0.590909	0.609971	0.68915	0.334677	0.557879	0.0905425	-0.40066	0.612388
Alphaproteobacteria; AEGEAN-169 OTU3156804														1	0.562317	0.57588	0.671188	0.66129	-0.0174136	0.419355	-0.270528	0.469575	-0.33761	-0.207478	-0.479472	-0.258062	0.144428	-0.00953079	-0.100222
Actinobacteria; Ca. Actinomarina OTU639502															1	0.108138	0.563416	0.173021	-0.469068	0.0696481	-0.202346	0.670821	-0.256598	0.00183284	0.016129	-0.140919	0.590909	0.494135	-0.528378
Gammaproteobacteria; SUP05 OTU819670																1	0.469208	0.682185	0.165888	0.313416	-0.0461877	0.0249267	-0.517229	-0.140029	-0.559751	-0.318953	-0.316349	-0.361804	0.15365
Unassigned Bacteria OTU0																	1	0.226173	-0.464485	0.00733138	-0.609971	0.738636	-0.567082	-0.5011	-0.593842	-0.520184	-0.181452	0.275293	-0.524325
Gammaproteobacteria; HOC36 OTU60638																		1	0.446522	0.717742	0.115103	-0.0736804	-0.185484	0.127933	-0.443182	-0.0446535	0.0245601	-0.343475	0.440315
Thaumarchaeota; Ca. Nitrosopelagicus OTU1584736																			1	0.474017	0.247457	-0.603978	0.333425	0.217029	-0.0529741	0.197769	-0.249106	-0.53084	0.963624
Euryarchaeota; MG II OTU104364																				1	0.00549853	-0.106672	-0.0678152	0.258431	-0.210777	0.0788685	0.141862	-0.419721	0.512903
Gammaproteobacteria; UBA10353 OTU266046																					1	-0.565982	0.375367	0.690982	0.565616	0.434936	0.385264	-0.231305	0.27119
Alphaproteobacteria; AEGEAN-169 OTU592269																						1	-0.314516	-0.509531	-0.191349	-0.241245	0.122801	0.542889	-0.692714
Euryarchaeota; MG II OTU 3134564																							1	0.298754	0.489003	0.583975	0.110704	0.122434	0.340461
Deltaproteobacteria; SAR324 OTU837775																								1	0.497801	0.416959	0.529326	-0.252933	0.268242
Actinobacteria; PeM15 OTU585063																									1	0.541061	0.519062	0.254032	-0.0375834
Alphaproteobacteria; AEGEAN-169 OTU3624																										1	0.303296	0.183253	0.175457
Actinobacteria; Ca. Actinomarina OTU1104793																											1	0.18585	-0.265295
Synechococcus; CC9902 OTU427495																												1	-0.58328
Thaumarchaeota; Ca. Nitrosopelagicus OTU4073697																													1
